# Supplementary material for: Succession of physiological stages hallmarks the transcriptomic response of fungus Aspergillus niger to lignocellulose
Source: bioRxiv preprint, doi:10.1101/806356, version 1 (2019-10-17)
Supplement: Supplemental Table 4 [file 806356_file08.xlsx]

## Sheet: all_pca_loadings
	PC1	PC2	PC3	PC4	PC5	PC6	PC7	PC8	PC9	PC10
Aspni5_57211	-3.5493e-05	0.001164	0.0029435	0.002268	0.0033757	-0.0067153	-0.0024933	0.0038021	0.0012819	7.3616e-05
Aspni5_56930	0.0006075	0.0059413	-0.0035651	0.00034386	-0.014137	-0.0074214	0.0074034	-0.0041	0.0051906	0.0048208
Aspni5_56861	0.0041531	-0.00021802	-0.002542	-0.0061755	-0.0029382	0.0023893	-0.0059899	-0.0012143	0.0051507	-0.0054464
Aspni5_56745	-0.002104	-0.0033383	0.0030364	-0.00078236	0.00098965	-0.002557	-0.0045069	-0.0018154	0.00030419	0.0034635
Aspni5_56472	0.0063784	-0.0032239	-0.0013873	-0.001465	0.002718	-0.0019807	-0.0099667	0.0038253	0.0029981	-0.0022616
Aspni5_56429	-0.0022389	-0.0028996	-0.0016043	0.00081727	0.0020167	-0.0030307	-0.0054269	0.00073245	-0.0023783	0.0037097
Aspni5_56338	-0.008563	0.0074214	-0.018034	0.00060577	-0.028673	0.0044705	0.0011165	0.0010865	0.022832	-0.0012682
Aspni5_56296	0.0041384	0.0013452	0.0024438	0.002622	-0.00031751	-0.0029215	-0.0014213	0.0016562	0.0033104	-0.0011811
Aspni5_56154	0.0038168	-0.0025097	0.0039046	0.0012586	-0.0043067	0.00055064	-0.0019793	-0.00235	-0.00469	-0.0017897
Aspni5_56064	0.00025198	-0.004904	0.0019029	-0.00061512	-0.0045039	0.001848	-0.0030563	0.00060681	-0.0032679	-0.0031077
Aspni5_55758	-0.0027833	-0.001901	-0.0034291	0.0015372	0.0069275	0.0027086	0.0063899	-0.001775	0.0015555	0.0049617
Aspni5_55645	0.0010992	0.0031166	-0.00079636	0.00013943	0.0056701	0.0014527	-6.4459e-05	0.0020946	0.0051891	-0.0027344
Aspni5_55567	-0.00079774	0.014002	0.0050883	-0.0019582	0.0036588	-0.0033499	0.0027045	-0.0017507	0.015622	0.0064788
Aspni5_55543	0.0023223	0.0010712	0.0036857	-0.00012958	-0.00074224	-0.0001784	-0.0071662	-0.0010347	-0.0087061	0.0018917
Aspni5_55495	0.0014807	0.00076345	0.00062051	-0.00030424	0.0035525	-0.0040286	0.001898	0.0043092	0.0038231	0.0017987
Aspni5_55209	-0.0087136	-0.0058082	0.0071187	0.0067861	-0.022011	-0.0083955	0.0039349	-0.022633	0.0082697	0.02728
Aspni5_55153	-0.0031568	-0.011001	0.014071	0.0019285	0.0036541	-0.013461	0.026719	-0.00257	0.017219	-0.0051508
Aspni5_55148	0.0066785	-0.00020411	0.0045722	-0.0109	-0.0040439	-0.0055178	0.0062307	0.00029265	-0.0074074	-0.0034275
Aspni5_55058	-0.010928	-0.00042375	0.0049996	-0.0031044	-0.0029076	0.0034947	0.0088976	0.0023122	0.011859	0.0068307
Aspni5_54922	0.0042346	-0.0021631	-0.0056981	0.0013008	0.010806	-0.0037492	0.0083178	-0.0079563	0.0068424	0.00060581
Aspni5_54869	0.030238	-0.014631	-0.0085177	-0.0033044	0.012677	0.0098395	0.0019989	-0.0042428	0.028092	-0.02237
Aspni5_54867	-0.020769	-0.021877	0.0093646	-0.0012029	-0.00085177	0.0069067	-0.0071171	-0.0027877	-0.011911	0.001736
Aspni5_54865	0.019982	0.019658	-0.041093	-0.0018536	-0.033147	0.018	-0.0027418	0.011552	0.023187	-0.015042
Aspni5_54844	0.0075274	-0.022562	-0.0073507	0.00080185	-0.0053927	-0.007918	-0.012315	-0.00083566	-0.0077352	-0.014667
Aspni5_54765	-0.00088224	-0.0015692	0.0034611	-0.0014454	-0.0030662	-0.0030039	-0.0058313	-0.001315	0.0013052	-0.0024005
Aspni5_54678	0.0063367	0.0019563	-0.0046952	-0.0063666	0.0016282	-0.0038237	-0.010743	0.0048514	0.0068278	-0.0053507
Aspni5_54575	0.00042356	-0.0033357	0.0035975	-0.00025077	-0.00096057	-0.0024142	-0.0051102	-0.0025675	-0.0011914	0.00072499
Aspni5_54440	-0.0040643	-0.0065885	-0.0028242	-0.0055716	0.0034639	0.013784	0.0068253	-0.0032359	0.007432	0.0060808
Aspni5_54433	0.002802	-0.00067393	-0.0041443	0.001865	0.0052561	-0.0039377	-0.00378	0.0020666	0.0028416	0.0055706
Aspni5_54391	-0.0020461	-0.0035388	0.0025678	0.00029713	-0.0058524	0.0026511	-0.0012935	-0.00082618	0.0017089	0.0033615
Aspni5_54374	0.00014822	0.0014146	-0.0023712	-0.0048462	0.010924	0.0013041	0.02506	0.0069785	0.021362	0.004985
Aspni5_54287	0.0019627	-0.0030901	0.0028954	0.0021898	0.0014561	-0.0047415	-0.0015009	0.0002143	0.0035225	-0.0014726
Aspni5_54270	0.004546	-0.00408	0.00234	0.0019991	-0.0076326	1.3629e-05	-0.0065452	-0.0015781	-0.00637	-0.004739
Aspni5_54235	-0.0010695	-0.006006	-0.0040005	0.0043024	0.0039112	-0.0034099	0.0033507	0.003531	0.0022218	0.0070151
Aspni5_53982	0.0040022	0.001151	0.0071702	0.014174	0.0023337	0.017691	-0.0072488	0.01448	0.019036	-0.01175
Aspni5_53980	0.005189	0.0024626	0.0063864	-0.0019182	-0.018361	0.0016339	-0.0058869	-0.013314	-0.0012573	-0.012259
Aspni5_53947	-0.0027187	-0.00011234	-0.0023166	0.0030845	0.0080777	0.0066868	0.0016985	-0.0065491	-0.0010602	0.0094234
Aspni5_53927	9.4367e-05	-0.0033093	-0.0026049	0.0034927	0.0026645	-0.0023548	-0.003833	-0.00062849	-0.0031961	0.0038093
Aspni5_53845	0.018625	0.016517	0.00020726	-0.0020854	0.0068693	0.016119	0.00012227	0.01189	-0.0061178	0.017791
Aspni5_53706	-0.012539	-0.0017013	-0.0054943	-0.0032258	0.00028153	0.0013983	0.0059345	0.003084	0.013044	0.0020016
Aspni5_53668	0.0087114	0.0035067	0.0038906	0.00072722	0.0019785	-0.006243	-0.0028722	0.0024902	0.0037585	-0.0019191
Aspni5_53663	0.0035029	-0.0028112	-0.0026655	0.001037	-0.0044067	-0.00098689	-0.0043398	0.0054855	0.0076401	-0.0086487
Aspni5_53657	0.00049477	-0.0050179	0.00079497	0.0019054	-0.0053142	0.00013376	-5.2574e-05	-0.0019289	0.0036839	-0.0013149
Aspni5_53656	0.011406	-0.011912	-0.011961	-0.0098697	-0.02461	0.0032723	0.00081446	0.003666	0.0079079	-0.0047358
Aspni5_53655	0.0014461	-0.002069	0.002124	-0.0026942	-0.0067935	0.0013991	-0.0020024	0.0019021	0.0041198	-0.0011702
Aspni5_53574	-0.0031437	-0.0035413	-0.0019562	0.010792	0.0034253	-0.0031243	0.0017102	-0.0045915	0.0084016	0.0060568
Aspni5_53555	-0.011116	-0.0045325	-0.010855	-0.0040418	0.014871	0.0034707	0.0017113	-0.0001896	0.0061492	-0.0025475
Aspni5_53364	0.0021614	-0.0001765	-0.0041291	-0.001089	0.0061932	-0.0033379	-0.0010058	0.0029788	-0.0032354	0.0016302
Aspni5_53357	-0.0051692	0.00062799	0.0070674	-0.0004461	-0.0092453	0.0024381	0.00046712	-0.0012183	0.0038391	0.0011675
Aspni5_53348	-0.00081569	0.0013171	0.0016129	-0.0075849	0.0016795	-0.0029694	0.00097659	0.011078	0.0018809	0.0065181
Aspni5_53188	-0.010659	-0.0022111	-0.0042414	-0.009191	0.012309	0.00061495	0.0051812	-0.0023104	0.0040831	0.010108
Aspni5_53152	0.0050551	0.0060475	-0.0024034	-0.0035773	-0.019877	-0.005195	0.010206	0.002817	0.010513	-0.0033325
Aspni5_53146	-0.0020375	0.0018116	0.0032036	0.0015076	0.0064662	0.001162	0.003766	0.0031722	0.0025111	0.0075762
Aspni5_53140	-0.0021511	-0.0016259	0.00061337	0.0073078	-0.0063041	-0.00029426	-0.0061276	0.0011191	0.0017086	0.003822
Aspni5_53116	0.004037	0.0006534	0.0019355	0.0012064	-0.001923	-0.0032762	-0.0073907	0.0028722	-0.0027915	-0.0016718
Aspni5_53115	0.0042357	-0.00047979	0.0010413	0.00029225	0.00045951	-0.0055585	-0.0035817	0.0032665	0.0030659	-0.00073551
Aspni5_53033	-0.004043	-0.0024817	0.0030541	-0.00028253	-0.0064445	-0.0056675	0.0080748	-0.01026	0.0119	-0.0021387
Aspni5_53015	0.0069	-0.0015886	-0.0079574	-0.0016458	-0.0030573	-0.0055848	-0.014249	0.0095716	-0.0073308	-0.0070471
Aspni5_52903	0.00846	0.0037854	-0.0021468	0.0004846	-0.0043334	-0.0014097	-0.0041596	0.0072406	-0.0066124	-0.008288
Aspni5_52853	0.0069861	0.0011497	0.0003238	0.0026295	0.0020007	-0.0056229	-0.0026858	-0.0057464	-0.0032035	0.00092489
Aspni5_52848	-0.006326	-0.021422	0.012031	-0.022163	-0.01455	-0.028383	0.0074604	0.0077958	-0.015597	-0.012857
Aspni5_52774	-0.0056732	-0.0020146	0.0042406	0.0042922	0.013893	-0.016135	-0.0048476	0.0023183	0.010401	0.011518
Aspni5_52498	1.0676e-05	-0.0031851	-0.0011254	0.0017381	-0.010015	0.0018138	-0.0094878	0.0033215	0.0034869	-0.0017664
Aspni5_52344	0.0071066	0.012904	0.00204	-0.0078981	-0.0068982	-0.0007495	-0.00099497	0.0021677	-0.00093904	-0.0019576
Aspni5_52103	0.015683	0.013052	-0.021525	-0.017855	-0.026536	0.0068086	0.015024	0.024366	0.0086685	0.0079381
Aspni5_52066	0.0063088	0.0013577	-0.0012423	-0.0088734	0.0040017	-0.0031364	-0.010613	-0.0002906	-0.0016261	-0.0024665
Aspni5_52063	-0.0016663	-0.0065393	0.0046986	-0.0053521	-0.0058769	-0.0058097	-0.0011834	-0.0049758	0.0045942	-0.0068983
Aspni5_52026	0.00048848	-0.0034969	0.00051087	0.0025434	-0.0018839	-0.0014349	-0.0061835	-0.0015079	-0.0047471	-0.00049622
Aspni5_52015	-0.0011382	-0.0037701	-0.0003119	7.6954e-05	-0.00047412	-0.00039175	-0.0048298	0.00039547	-0.0047294	0.00231
Aspni5_51987	0.0030099	0.00081301	0.00088495	0.0005811	0.0040566	-0.0036958	0.0012696	-0.0018676	0.0036285	-0.0010701
Aspni5_51917	0.004802	0.0042352	-0.0051839	0.00097216	0.0097686	0.0036826	0.0050525	0.00079928	0.00014845	0.0083152
Aspni5_51718	0.0014155	0.00045044	0.0090263	-0.0030512	-0.0033527	-0.0011267	0.00037783	-0.0028155	0.0056398	0.0056169
Aspni5_51629	0.0039963	0.00089837	0.0044047	0.00057326	-0.0025798	-0.0010939	-0.0026756	0.00050156	0.00042408	-0.0020127
Aspni5_51523	-0.0077022	-0.0024446	0.014257	-0.012967	-0.016545	0.011832	-0.004325	-0.015661	0.0029603	0.0053341
Aspni5_51412	0.0034835	-0.00047622	-0.0030315	-0.0042853	0.00033169	-0.0042679	-0.010382	0.0042564	-0.0048652	0.00061386
Aspni5_50982	0.0041836	-0.00047228	-0.0031445	0.0038602	0.00067092	-0.0023745	0.0029675	-0.0082602	3.0165e-06	0.001556
Aspni5_50981	0.007223	0.018402	0.0066987	-0.0060391	-0.010241	0.0088683	-0.0027852	-0.0026678	-0.0010479	-0.0030663
Aspni5_50980	-0.0082395	-0.010689	-0.0029404	0.0001657	-0.025738	0.037088	0.0068081	0.026188	-0.0024527	0.00080284
Aspni5_50979	-0.020654	0.0033884	-0.018145	0.011945	-0.034558	-0.010523	-0.0076955	0.0034134	0.020136	0.012954
Aspni5_50977	0.0022938	0.013947	0.022562	0.0074014	-0.0071702	0.0099072	-0.0042381	0.013069	-0.0019829	0.0021971
Aspni5_50976	0.013579	0.014044	0.01888	-0.0082177	-0.0013922	0.015955	-0.0092182	0.0027791	-0.0018656	0.005846
Aspni5_50936	-0.013203	0.011813	-0.0028882	-0.0068059	0.0037743	-0.012679	-0.0014349	0.048116	-0.0022605	0.023189
Aspni5_50930	0.006091	0.0013649	0.0039862	-0.0056445	0.0022735	0.010985	-0.011183	-0.003979	-0.0066365	0.002242
Aspni5_50777	0.0036157	0.00093601	0.00090193	0.00091011	0.0047188	-0.0040856	-0.001125	0.0051502	0.00012611	-0.00043782
Aspni5_50495	0.00092234	-0.00087837	-0.011422	0.0043126	-0.015157	0.012495	-0.0054617	0.011685	0.0023687	0.0014461
Aspni5_50237	-0.0088258	0.019105	0.029444	0.008278	0.019439	0.0089246	-0.027291	0.0052182	-0.01475	0.011925
Aspni5_49900	-0.0018688	0.004295	0.012956	-0.0045824	-0.0098382	-0.0033377	0.0076885	-0.007612	-0.002777	-0.003466
Aspni5_49696	0.0030718	-0.00051282	0.0055108	-0.0031817	-0.0040427	0.00061338	-0.0059708	-0.0012664	-0.0066819	-0.00075814
Aspni5_49603	0.012145	0.0014742	0.0010135	0.0077829	0.0095044	0.0068178	-0.0036222	-0.0029186	0.01588	0.0015216
Aspni5_49598	0.0078187	-0.029711	0.0027523	-0.0097837	-0.020271	0.0094515	0.016305	0.011096	0.0019656	-0.0073133
Aspni5_49499	0.0070228	-0.0098503	0.00299	0.011478	-0.0017175	0.0034449	0.00053724	-0.017631	0.0089149	-0.0086018
Aspni5_49473	0.0028049	-0.0041304	0.0011109	-0.0012039	-0.0026155	-0.0018113	-0.0039516	-0.0020554	-0.0041474	-0.0044369
Aspni5_49317	0.00083458	0.0090544	-0.0011188	-0.0052507	-0.0067358	0.011523	-0.0059463	-0.0041511	-0.0055702	-0.0055711
Aspni5_49311	0.00063292	0.0046859	0.004083	-0.0056366	-0.010022	0.0021297	0.0014562	0.0038114	-0.0066398	0.0030809
Aspni5_49276	0.0044722	-0.00013114	0.00022861	-0.0023974	0.00121	-0.0030621	-0.0034344	0.0050484	-0.0043886	0.00012277
Aspni5_49100	0.0001275	-0.0049042	0.0084601	0.0011229	-0.0021399	-0.0046475	-0.00092728	-0.0045974	0.0008081	-0.0096031
Aspni5_49092	0.0079264	8.4764e-05	0.0069981	0.00050543	0.00051874	-0.0022837	-0.0035417	0.0027732	0.004779	-0.005895
Aspni5_48902	0.011237	0.011483	0.0058172	-0.0033363	-0.0060798	-0.0043207	-0.0025765	0.0059302	0.0062819	-0.0063107
Aspni5_48025	-0.001439	0.0038664	-0.019673	-0.012963	-0.027514	-0.01869	0.01105	0.01225	0.0074484	-0.016714
Aspni5_47986	-0.00095473	0.00069999	-0.0031433	0.00060685	-0.0035598	-0.006372	-0.0097937	0.0025777	-0.0046615	-0.0015707
Aspni5_47971	-0.0029755	-0.0029891	0.0058345	0.001195	-0.0013204	0.0034419	-0.01274	-0.0031846	-0.0021615	0.0068495
Aspni5_47911	-0.015016	0.012057	0.00094606	-0.0080151	-0.022167	-0.0072948	0.003645	0.016954	0.014105	0.0077778
Aspni5_47870	0.0060019	0.0051609	0.0082462	0.0043884	0.001222	-0.0015731	0.0037888	-0.0019908	0.0025942	0.003182
Aspni5_47867	2.17e-05	-0.001794	0.0042129	-0.0019672	-0.0022917	-0.002558	-0.0093557	-0.00027834	-0.00040351	0.0028302
Aspni5_47818	-0.0043689	0.0023428	-0.0063185	0.02258	-0.01746	0.01427	-0.0079437	-0.0071833	0.015058	0.010125
Aspni5_47772	0.0056204	0.022054	0.0026801	-0.025503	-0.013264	-0.0051567	-0.0033826	-0.0027385	0.017433	-0.0025339
Aspni5_47664	0.00091767	0.0042237	0.0013001	0.011523	0.0013935	-0.0010213	-0.00040156	-0.0025187	0.00017319	0.0057092
Aspni5_47491	0.0030757	-0.0025521	-0.0022392	-0.0046523	0.008934	0.0021013	-0.0065732	0.0052698	0.00048603	-0.00093206
Aspni5_47240	-0.016311	-0.0022864	0.0059719	-0.0084714	-0.0014919	-0.016512	0.0010551	0.033342	0.022692	-0.022502
Aspni5_47218	-0.0032353	0.0018286	0.00017467	-0.0014112	0.0017841	0.00033745	-0.0029192	0.0028176	-0.0032362	0.0074104
Aspni5_46889	0.004991	0.00035532	-0.00025126	-0.0047841	-0.010246	-0.0035115	-0.0049746	0.00016316	-0.0033785	-0.0033296
Aspni5_46852	0.0054747	0.0044531	0.001654	-0.0058422	-0.0043903	-0.0075268	-0.0039072	0.0021474	0.0045634	-0.003109
Aspni5_46836	0.0037498	0.00028832	0.008227	-0.010682	0.013443	0.015624	-0.0035264	-0.0025968	-0.0046012	0.0040612
Aspni5_46835	-0.0022776	-0.0009103	-0.00060503	0.0062182	-0.0069621	-0.0054644	-0.0080918	-0.00072526	0.0017692	-0.0050871
Aspni5_46834	-0.0095115	0.0093417	-0.0088408	-0.00084876	-0.0096154	-0.013756	-0.019164	0.0068739	-0.012899	0.0019299
Aspni5_46832	1.6503e-05	-0.0026886	0.0050937	0.00052979	-0.010536	-0.0055952	-0.012327	-0.0043482	-0.004953	0.0029776
Aspni5_46226	-0.002098	0.00044158	0.0013425	0.0028442	0.0046402	-0.0024302	0.0046237	-0.006251	0.0074395	0.0048191
Aspni5_46170	0.0013182	-0.003909	-0.0093257	-0.0018487	0.011641	0.0014427	0.0018718	0.0056706	0.0040306	0.0063928
Aspni5_46166	0.012481	-0.0035638	0.01351	0.0090814	0.0088976	0.0029402	-0.0022583	-0.00337	0.014472	-0.0032757
Aspni5_46165	-0.0010174	-0.0060082	0.00014118	8.5592e-05	0.0049208	0.0016362	-0.0084553	0.0088317	0.0051864	-0.0012518
Aspni5_46158	-0.0117	-0.010317	-0.01596	-0.015093	0.019273	0.0078584	-0.0036012	-0.0056988	0.0062467	0.00040559
Aspni5_46156	0.0078281	-0.0032286	0.022683	-0.0088071	-0.010346	-0.007527	-0.0074665	-0.0016054	-0.0032306	-0.0097998
Aspni5_46155	0.0061741	-0.00037489	0.0028533	-0.00059712	-0.001529	-0.0034646	-0.0054373	0.0017753	0.0033881	-0.0030212
Aspni5_46152	-0.012931	-0.0068402	0.0028163	-0.0023239	-0.00037299	0.0045959	-0.0026624	0.0053726	0.0059717	-0.0082677
Aspni5_46151	-0.023051	-0.0080765	0.01028	0.0057682	-0.0011143	0.011104	-0.003786	-0.0024688	0.0031514	0.0013516
Aspni5_46150	0.0045868	-0.0061153	-0.014929	0.0037551	-0.0052826	0.007015	0.0025066	0.012495	0.013696	0.0017452
Aspni5_46149	0.0085619	-0.0059257	-0.014838	0.002047	-0.022539	0.0074112	0.0032299	0.020225	0.0071042	0.00096644
Aspni5_46147	0.00056327	-0.00030042	0.00074123	-0.0016668	-0.0016639	-0.00070665	-0.003149	0.0035527	-0.0015868	-0.0019532
Aspni5_46121	-0.0048345	-0.013392	0.020977	-0.0061527	0.0022206	-0.014512	-0.001978	0.0019118	0.0014625	0.0038132
Aspni5_46108	-0.0057912	0.0025419	-0.0028835	-0.0016628	0.0022663	-0.0054823	0.014582	0.013189	0.002281	-0.0016414
Aspni5_46107	0.0038255	-0.00052064	0.0067679	0.0019868	-0.0068667	0.0070578	-0.0065625	-0.0048371	0.0056544	0.010968
Aspni5_46105	0.0022834	-0.0030193	0.00026393	0.0011828	0.0050748	-0.0022388	-0.005934	0.00093485	0.0032493	0.0082744
Aspni5_46101	-0.0025963	-0.018664	0.010192	0.006252	-0.023928	-0.00072053	-0.0071105	-0.039174	0.017521	0.013829
Aspni5_46100	-0.001245	-0.0063232	0.0071822	0.0035204	-0.0097329	0.0028784	-0.0029157	-0.018195	0.0023143	0.008547
Aspni5_46099	-0.0059429	-0.011708	0.0026616	0.0058146	-0.019929	-0.008657	0.0093885	-0.022799	0.011311	0.027536
Aspni5_46070	0.0024769	-0.0050149	-0.0011309	0.00091965	0.0022493	-0.0098013	-0.0047038	-0.011028	0.0018906	-0.0045359
Aspni5_46066	-6.1718e-05	-0.0048485	0.0036505	0.0053999	-0.0080343	0.0034497	-0.0094702	-0.0057051	0.0096368	-0.007326
Aspni5_46053	-0.0089893	0.0027234	-0.0026849	-0.010745	-0.0073791	-0.012297	-0.012932	0.018139	-0.0035094	0.0071241
Aspni5_46035	3.8686e-05	-0.00011018	-0.0022548	0.0008761	0.00090675	-0.0007461	-0.0002686	-0.0018658	0.0017037	0.0011331
Aspni5_46024	0.01448	-0.00073638	-0.0095024	-0.0041367	0.00079414	-0.0029064	-0.003558	0.0020338	-0.0026581	-0.0049175
Aspni5_45996	0.0057809	-0.0041182	0.00093436	0.0029466	0.00086034	-0.0014999	-0.0076201	-0.013325	0.0063148	0.0071544
Aspni5_45974	0.015955	-0.0033386	-0.012636	0.0051715	-0.0013162	0.0038472	-0.0035934	-0.012893	0.0023907	0.0021584
Aspni5_45936	-0.017853	0.0025645	-0.0039214	-0.011139	0.011203	0.00067639	-0.011774	-0.012908	-0.012689	0.027442
Aspni5_45864	0.0026343	-0.0057948	-0.0039819	-0.0016848	0.0021915	-0.0047158	-0.0036347	-0.0040046	0.00052737	0.0033847
Aspni5_45859	0.0025518	-0.0046613	0.0057504	-0.0043553	-0.0043454	-0.0046275	-0.0058108	-0.008039	-0.00043956	-0.0031393
Aspni5_45843	-0.0091687	-0.0043093	0.005621	-0.0010527	-0.0018231	-0.010982	0.0045974	-0.0022823	0.011261	-0.0035066
Aspni5_45840	-0.0012348	-0.011135	0.013072	-0.001555	0.0057183	-0.0055576	0.017424	-0.0151	0.0087797	-0.0052707
Aspni5_45837	0.00659	0.00065307	0.0075376	-6.496e-05	-0.0023981	-0.00603	-0.0026508	0.001774	0.0019854	-0.0030546
Aspni5_45833	0.0060816	0.0061939	0.0037036	-0.011182	-0.011936	-0.0048357	-0.0092709	0.0040877	0.018293	-0.010741
Aspni5_45672	-0.003944	-0.001278	0.0022592	-0.0016319	-0.004805	0.0069099	-0.0033923	0.0019103	0.014089	0.0075122
Aspni5_45633	0.0039166	0.00065893	0.011521	-0.0083209	0.0016667	-0.0055019	-0.013524	0.0034792	0.0032924	-0.0014134
Aspni5_45623	-0.00057065	-0.0069455	0.011883	0.01276	-0.0094372	-0.017904	0.016894	0.041867	0.0092465	0.0094506
Aspni5_45622	0.0050299	-0.0031573	0.016518	0.0052165	-0.0068303	-0.019901	0.013647	0.021912	0.008436	0.0011833
Aspni5_45611	0.0024377	-0.0056212	-0.0058845	-0.0011346	0.0045476	-0.0065817	0.00015676	-0.0022713	-0.0016274	0.0011631
Aspni5_45547	0.0043682	0.0030887	0.0052545	0.0029872	0.0014783	-0.0054925	-0.0031171	0.0023457	0.0033109	0.00040045
Aspni5_45519	-0.0020939	0.0020014	0.00058955	-0.0083853	-0.0008686	0.0069285	-0.0021497	0.0039835	0.0082642	0.010528
Aspni5_45491	0.0045696	0.0018235	0.0012666	0.0013945	0.00046268	-0.0044757	-0.0060483	0.0051702	-0.00075142	-0.0070294
Aspni5_45472	0.002388	0.0019826	-1.7449e-05	-0.003919	0.0010756	-0.0029587	-0.0030174	0.0034402	0.0019004	0.00037269
Aspni5_45464	0.0063252	-0.014419	-0.016676	-0.015621	0.013698	0.0079901	-0.014639	-0.0074598	0.010167	0.00039566
Aspni5_45444	0.0020298	-0.0024393	0.0034607	0.0032462	-0.0029141	-0.001456	-0.0021906	-0.0020584	-0.0027309	0.0012835
Aspni5_45443	-0.00010594	0.00065886	-0.0027322	0.0018133	0.0017558	-0.0031364	-0.0011931	0.0027854	-0.0025638	0.0041816
Aspni5_45371	0.0044709	-0.0010128	-0.00042521	-0.0075882	0.0091105	0.0068911	0.0043491	0.00033205	-0.0012898	-0.0021829
Aspni5_45331	-0.00072743	-0.00067527	-0.0073	-0.01415	0.015366	-0.001059	-0.00077034	0.012256	0.017254	0.002403
Aspni5_45302	-0.016701	-0.011586	-0.00095308	-0.0080519	0.0048709	-0.0081622	-0.012429	0.015381	-0.0077732	0.011194
Aspni5_45301	0.0046129	0.0068435	-0.001025	0.0068727	0.0086155	0.0055271	-0.0052252	-0.00043199	-0.0024078	-0.0021475
Aspni5_45263	0.0013282	-0.0012242	0.00066216	0.0031294	-0.0087779	-0.0040884	-0.006655	0.0028523	-0.0014933	-0.0019506
Aspni5_45201	0.002603	-0.0035608	-0.0023228	-0.013221	0.0035015	-0.0030514	-0.010604	-0.0012043	0.0060283	-0.0099074
Aspni5_45191	0.00085303	0.00047477	-0.0041832	-0.0050975	0.0065624	-0.008863	-0.012683	-0.014374	0.020549	0.0043
Aspni5_45189	-0.0021113	0.0077926	0.00091752	-0.00702	-0.0032489	-0.024283	-0.012647	-0.0044909	-0.013432	-0.0056824
Aspni5_45173	-0.0022042	-0.0023235	-0.0074469	-0.012749	0.0082313	0.0071264	-0.0082007	-0.0059355	0.002423	0.0058734
Aspni5_45060	-0.0042526	-0.0087184	0.014868	0.0043289	0.011316	-0.003104	-0.010585	0.015533	0.017098	-0.0081869
Aspni5_45057	-0.00046338	-0.0011258	0.0057914	0.0028533	-0.0036298	-0.0011471	-0.0034942	-0.0017103	-0.0030947	0.00062678
Aspni5_45051	9.1253e-05	-0.0011332	-0.0018694	0.0029989	-0.0077234	0.0028906	0.00087979	0.00032479	0.0041569	-0.0010493
Aspni5_45045	0.025477	-0.025771	0.014049	-0.011336	-0.00025465	0.024012	0.0042063	0.01376	-0.01724	0.0099608
Aspni5_45042	0.018826	0.016873	-0.013916	0.0046384	-0.010474	0.015216	-0.0045197	0.0059585	0.026056	-0.0073883
Aspni5_45041	0.01823	0.011048	0.011824	0.011046	-0.014222	-0.0039619	0.01006	0.0081703	0.033568	-0.0020463
Aspni5_45038	0.008948	-0.0012782	-0.011446	-0.011841	-0.0017473	-0.0025739	-0.0093076	0.01054	-0.0091163	0.013551
Aspni5_45037	0.0053854	-0.00026626	0.0045602	0.0034031	-0.0027117	-0.0038772	-0.0012343	-0.0016808	0.0020489	-0.0034305
Aspni5_45023	-0.016612	-0.011451	0.0068674	-0.030129	-0.023095	-0.007871	-0.0080674	-0.015164	0.0010409	-0.0034232
Aspni5_45003	0.0011047	-0.00032206	-0.00057492	0.0005009	-0.0018108	-0.0050177	0.0023778	-0.00042234	-0.0025434	0.0010663
Aspni5_44987	0.00023456	-0.0033198	-0.0092846	-0.0082547	0.010974	-0.012498	0.0018983	-0.0027795	0.0057999	0.023944
Aspni5_44973	-0.0028792	-0.043771	0.0025802	-0.035114	-0.0099041	0.010122	0.0026375	-0.012963	-0.025706	-0.027728
Aspni5_44972	-0.015046	-0.021515	-6.9591e-05	-0.017532	-0.0093164	-0.024359	-0.019621	-0.011895	-0.017959	-0.012795
Aspni5_44964	-0.0023278	-0.028198	-0.013724	-0.011366	-0.0057639	0.004134	-0.0035881	-0.0018996	-0.014101	-0.014664
Aspni5_44959	-0.010639	0.0097473	-0.0029533	0.0082054	0.0052889	-0.02831	-0.025113	0.042796	-0.0082845	0.0044408
Aspni5_44958	-0.0039128	0.0068558	-0.0015144	-0.0015821	0.005388	-0.013942	-0.00094261	0.016597	-0.0027632	0.020421
Aspni5_44955	0.0019895	-0.0051401	0.0096464	-0.0063546	0.0013098	0.02136	-0.0080943	-0.010416	0.0012979	0.0013026
Aspni5_44952	0.0068214	-0.01572	0.016931	-0.027633	-0.023962	-0.01214	0.0023113	-0.006685	0.0038173	0.007507
Aspni5_44951	0.0039402	-0.0071017	0.020287	-0.014371	-0.021784	-0.015745	0.014456	-0.00038587	0.010326	0.0027443
Aspni5_44938	0.0029473	-0.0032115	0.0068026	-0.001921	-0.005656	0.0036103	0.00060085	-0.0036367	0.0068981	-0.0022535
Aspni5_44933	0.012075	-0.0078131	0.007969	0.0039377	0.004759	0.0059034	-0.0095867	-0.0022494	-0.0014455	0.012141
Aspni5_44930	0.0098874	-0.0035769	-0.0080217	0.0024768	-0.010491	-0.01636	-0.0172	0.0043677	-0.0055604	0.0024262
Aspni5_44913	-0.020183	0.015741	0.014983	-0.0035391	-0.01863	0.021663	-0.0099975	-0.00059588	-0.0016177	-0.013295
Aspni5_44892	-0.0073996	0.0031414	0.022383	-0.0014277	0.0090104	0.0062913	0.018877	0.013838	0.01888	-0.0048216
Aspni5_44834	-0.00063343	0.0015229	0.002232	-0.00045132	0.0010734	0.00037501	-0.00040299	0.00038844	-0.00029893	0.0053574
Aspni5_44802	-0.012925	-0.0082284	0.013666	0.0023714	-0.010107	0.0094175	-0.0059402	0.0043027	0.016958	-0.00062087
Aspni5_44770	-1.7486e-05	-0.0085068	-0.00022249	-0.0021555	-0.003014	0.0038091	-0.0075184	0.00090956	0.00081865	0.010203
Aspni5_44750	0.0081576	-0.0076528	0.0081235	-0.0015806	0.0051538	0.0098118	0.0020613	0.0025354	-0.0063202	0.010328
Aspni5_44688	0.0013021	-0.0021718	0.0041602	0.004224	-0.002069	-0.0034488	-0.0027457	-0.0061669	-0.0019511	0.00074339
Aspni5_44668	-0.0063565	-0.002567	0.0057598	-0.0053077	0.0023089	-0.0020214	0.00057239	0.0043397	0.015917	-0.0063049
Aspni5_44636	0.0060455	-0.0026352	0.0041386	-0.00088733	0.0039581	0.0076853	-0.0060971	0.0078034	0.0068277	-0.0030282
Aspni5_44635	0.011647	0.00060435	0.0011341	-0.0007095	0.0049454	-0.0035935	0.00055351	0.0015092	0.0099189	-0.0056473
Aspni5_44632	0.00062287	0.0052142	0.0031828	0.00086069	0.0087283	-0.002175	0.0030028	-0.00018423	0.0052674	0.0063141
Aspni5_44614	0.0050735	0.003406	0.0068198	-0.0034282	0.0051707	-0.0019217	0.0018818	0.00091127	0.0073784	0.002706
Aspni5_44600	0.0086233	0.0036784	0.0080048	-0.00066394	0.0020072	-0.017228	-0.015099	0.0066062	-0.0019405	-0.022438
Aspni5_44589	0.0053266	-0.014268	0.00043486	0.0099441	-0.023099	0.026691	0.00037973	0.022434	-0.022269	-0.0051496
Aspni5_44558	0.015675	0.028047	-0.0028558	-0.0024863	-0.025261	0.0289	-0.0062959	0.013419	-0.00539	-0.0094907
Aspni5_44483	0.0038224	-0.002051	0.0058332	-0.0052656	0.006938	-0.0032415	-0.0033862	0.0041101	0.0010648	-0.0095041
Aspni5_44476	-0.0015414	-0.0050816	-0.013807	0.014235	0.0071676	-0.0029722	-0.0070729	-0.00058869	0.029671	0.017765
Aspni5_44465	0.0007886	-1.6886e-05	0.0043868	-0.00088494	0.0011528	-0.0013049	-0.0057009	0.004263	-0.0031131	-0.0018438
Aspni5_44445	0.015858	-0.011834	0.016874	0.012321	0.0037552	0.0089677	0.00066459	-0.015164	0.0097386	0.013481
Aspni5_44366	0.0026224	0.00021788	0.0043133	-0.0083721	0.00307	0.0037483	-0.0051924	-0.0011675	0.0053048	-0.0048713
Aspni5_44365	0.00092526	0.00044199	0.0036679	4.3517e-05	-0.0012958	-0.00022738	-0.0017706	-0.00094422	-0.0011925	0.0033006
Aspni5_44359	0.004309	-0.0013821	-0.0054933	-0.00017003	0.0032766	-0.0073021	-0.0069675	0.0015219	0.0021747	0.0010531
Aspni5_44332	0.010366	-0.0052942	-0.00016335	-0.012094	-0.00029208	-0.0013567	0.0046706	0.0024948	0.022565	-0.0079758
Aspni5_44295	0.0080429	-0.016928	-0.0063019	0.0076507	0.0097161	0.01679	-0.012	-0.0040786	0.0006592	0.0096295
Aspni5_44277	0.0077718	0.010634	0.0027804	0.0091963	0.0062783	-0.00015535	-0.013777	0.0022068	0.0056419	0.014114
Aspni5_44205	-1.6567e-05	-0.0036922	-0.00053402	0.0031516	-0.00095572	-0.0037388	-0.0042782	-0.001373	0.0028611	0.010763
Aspni5_44135	0.0096548	-0.00312	0.0052995	-0.0016901	0.0081326	0.0039167	0.00050793	0.0079193	0.011795	0.00080276
Aspni5_44117	-0.0022162	-0.0031838	-0.0082763	0.0037284	-0.0053296	-0.016041	-0.016443	0.0023073	0.0018982	-2.0705e-05
Aspni5_44100	-9.2116e-05	0.0030881	0.0052103	-0.0047678	-0.012519	0.0073062	-0.0045735	0.0051036	0.0054452	0.00029119
Aspni5_44014	0.008936	0.0021041	0.012673	-0.0071951	0.0013368	0.00062308	-0.0076932	0.00058263	0.0032417	-0.011236
Aspni5_44012	0.00424	0.00082203	-0.0012904	-0.0070741	0.0042907	0.00099236	0.016627	0.0018649	0.006933	0.0074696
Aspni5_43969	-0.010141	-0.0078442	-0.0013403	-0.008639	-5.8493e-05	0.020305	0.015586	0.029042	-0.0016015	0.0033192
Aspni5_43968	0.0032722	-0.00019865	0.0026409	-0.0021202	0.0013739	0.0004838	-0.0044396	0.0036656	-0.0017651	-0.0035279
Aspni5_43966	0.0053308	0.0037439	-0.0001452	0.010548	-0.013074	-0.0036415	-0.0006462	0.0058242	0.009039	0.0035545
Aspni5_43936	0.011643	-0.0074622	-0.00019239	0.0017467	0.005144	0.0011988	-0.00081323	-0.010921	-0.0031445	0.007949
Aspni5_43933	0.0033806	0.0077897	-0.0063165	-0.0080943	-0.014575	-0.027683	0.020721	-0.012392	0.012212	0.027965
Aspni5_43851	0.0072021	0.0046401	-0.011204	-0.0068586	0.0040584	-0.010228	-0.0098486	0.015389	-0.0057189	-0.0066846
Aspni5_43825	-0.0046335	-0.00091158	-0.0047407	-0.00024656	-0.0026013	-0.0093466	-0.0015051	0.017799	0.0090727	-0.01383
Aspni5_43792	-0.0036282	-0.003674	0.0029869	-0.0031708	0.0021391	-0.0043364	-0.0016918	0.0017614	0.010868	-0.0069803
Aspni5_43783	-0.00022315	0.0031767	-0.0014613	0.0047234	-0.00058504	-0.0035087	-0.00082644	0.00017311	0.00025333	0.0046375
Aspni5_43753	-0.0040067	-0.0076682	-0.0050731	0.0027359	0.0071397	0.001339	-0.0014582	-0.0051468	0.00068001	0.0039837
Aspni5_43625	0.0015214	0.0036375	0.0065731	-0.0048324	0.00031994	0.003739	-0.003133	-0.0025136	0.0018423	0.005348
Aspni5_43538	-0.013248	0.030808	0.010549	-0.023792	-0.009543	0.019146	-0.0081336	0.024241	-0.018592	0.028712
Aspni5_43507	0.00040064	0.00050766	-0.0022921	-0.0016516	-0.0033469	0.0035281	-0.0036611	-0.0099387	0.0072174	0.0057414
Aspni5_43495	-2.6751e-05	0.0026687	-0.0089853	-0.0030819	-0.0056598	-0.0046068	-0.0095839	0.011044	-0.013147	0.0047104
Aspni5_43482	0.0017672	-0.0013276	0.00012275	-0.00045432	-0.0030506	0.00080137	0.0040525	-0.00049373	-0.0027543	0.0038139
Aspni5_43408	-0.003257	-0.0083519	0.014014	-0.0052496	-0.02484	-0.006127	0.0014951	0.0069911	-0.01671	0.026064
Aspni5_43386	0.015673	-0.003027	-0.0043366	-0.009406	-0.0036555	0.015433	-0.020789	-0.01482	0.0047555	-0.010719
Aspni5_43335	0.00075654	-0.0034653	-0.0093916	-0.0046945	0.013794	0.0059557	-0.0095132	-0.009335	0.0205	0.0082377
Aspni5_43317	-0.0041192	-0.0036322	0.0053312	-0.014997	-0.0050678	-0.00089776	0.012767	-0.0041773	0.010631	0.007961
Aspni5_43258	0.00098455	0.0062311	0.0068308	0.00064594	0.0061374	-0.0044552	-0.00094608	0.002793	0.012809	0.0018668
Aspni5_43257	-0.0028837	0.001192	-0.00010822	0.0012911	0.0067941	-0.0074146	0.004541	0.0020916	0.0081909	0.0028875
Aspni5_43156	0.0032599	-0.0023966	-0.0015961	0.00017057	0.0023526	-0.0037511	0.0018269	6.9074e-07	-0.001827	0.0046423
Aspni5_43114	-0.0042384	-0.0045881	0.0087241	-0.00047279	-0.004774	0.0059338	0.015612	-0.0082095	0.022663	0.019997
Aspni5_43109	0.003271	-0.0067275	0.0078842	-0.014932	0.00088892	-0.0025097	-0.018756	-0.003493	0.011134	-0.015849
Aspni5_43088	-0.0052495	0.00094843	-0.008113	-0.0086858	0.0137	0.0053884	-0.0022271	0.0050588	-0.00059494	0.0094845
Aspni5_43069	0.0051533	-0.004361	-0.0027356	-0.0038902	0.0041835	-0.0049886	-0.011063	0.0027745	0.009061	-0.0026696
Aspni5_43065	0.0046577	-0.0010629	0.0017499	-0.00071254	-0.0027425	-0.0052528	-0.01199	-0.0017147	-0.00026613	0.00040354
Aspni5_43064	0.002466	-0.0011716	0.0046271	0.004564	-0.0028985	-0.0037689	-0.0038897	0.00053016	0.0030131	0.00052172
Aspni5_43031	-0.00080221	-0.00048469	0.0097836	-0.0034361	-0.0066073	-0.0032656	0.00017646	-0.0004243	0.00096836	0.0021758
Aspni5_43007	-0.002838	0.0020074	0.0031706	0.0028726	0.0034541	-0.0049515	0.0046606	-0.0022504	0.0086441	0.0042367
Aspni5_42924	0.00085785	0.00070742	-0.00052323	-0.00088207	-0.00087429	-0.0011824	-0.0027161	0.0016902	-0.00073489	-0.004867
Aspni5_42895	0.010468	-0.011744	-0.016814	-0.019265	-0.0089529	0.0037271	-0.014653	0.0078913	-0.0042662	0.011563
Aspni5_42884	0.0024347	-0.011759	-0.0068919	-0.0084594	0.0069948	0.00026077	0.0054183	0.0058398	0.011044	-0.0005247
Aspni5_42868	0.00048795	-0.00044227	0.002871	-1.8557e-05	0.0064836	-0.0045843	-0.0028452	0.0017453	-0.0026198	0.004744
Aspni5_42843	0.002631	0.0021376	0.0076372	0.0040046	-0.0048246	-0.0026516	7.5851e-05	0.0015417	0.0050399	0.0019165
Aspni5_42818	0.0057379	-0.002782	0.0044594	-0.013946	0.038056	0.0027075	0.0023924	0.0078394	0.016321	-0.00044691
Aspni5_42810	-0.0043137	0.005441	0.0027949	-0.0023175	0.00092639	-0.0028173	-0.0080336	0.0052404	0.0065706	-0.004316
Aspni5_42763	0.025573	-0.0016401	-0.0085639	-0.0069084	-0.00016442	-0.010335	0.0051708	0.0026987	0.0097325	-0.009058
Aspni5_42743	-0.013595	-0.011236	0.0094596	-0.013777	-0.0036673	-0.031364	0.0051005	-0.00097941	0.0066899	-0.010027
Aspni5_42739	0.00043663	0.00025433	-0.00041793	0.00078332	-0.0016512	-0.0018668	0.00062071	-0.00058492	0.0020769	0.0012983
Aspni5_42719	0.0024073	0.0022959	0.0044535	3.3114e-05	0.0005747	1.5137e-05	0.0051125	-0.0022531	0.0024975	0.00011649
Aspni5_42717	0.0098968	-0.00080867	0.0023761	0.0062386	0.0011021	0.00086533	-0.011287	0.0033494	0.00014415	-0.0066438
Aspni5_42668	0.023032	-0.0040986	-0.007672	-0.01391	0.00014051	-0.0087677	0.012215	0.0039482	-0.0044451	-0.0060557
Aspni5_42652	0.0047396	-0.0017273	0.01963	0.0031492	-0.0023269	-0.0058851	-0.0096604	-0.00066863	0.0045825	0.0059857
Aspni5_42531	-0.004558	0.0012879	0.0092608	0.0068443	-0.0031837	0.0024371	0.0056357	-0.0064558	0.0099811	0.0037671
Aspni5_42527	-0.00052017	0.00012848	0.012122	0.0092938	0.011985	-0.0028493	-0.0036958	0.00089666	0.017159	-0.0058286
Aspni5_42525	-0.0010051	-0.0084688	0.0066859	0.0038136	-0.0088004	-0.0029604	-0.012672	0.0014424	0.007628	0.001534
Aspni5_42523	-0.0030247	-0.008193	0.012755	0.0085451	-0.016218	0.0083382	-0.0072866	-0.0097017	0.0083205	0.0056223
Aspni5_42513	-0.00093848	0.00091231	-0.0034681	0.0010499	-5.8242e-05	-0.0070824	-0.010316	0.0043961	0.00072347	-0.00051854
Aspni5_42490	0.009419	-0.01225	-0.01672	0.0024923	0.0013028	-0.0011459	-0.012258	0.0012619	-0.0083976	-0.0053688
Aspni5_42463	0.0018525	-0.0077652	0.00099536	-0.0004709	0.0020593	0.0034849	-0.0045328	-0.001819	-0.0018735	0.0074731
Aspni5_42462	0.0074556	-0.0046384	0.0090962	-0.0021334	0.0037412	0.00064644	-0.024737	0.011024	-0.0038543	-0.0035872
Aspni5_42452	-0.0064797	-0.0031324	0.00085332	0.00086654	0.00028755	-0.00049254	-0.0029153	-0.0032596	0.010463	0.019104
Aspni5_42414	0.0077314	-0.0041523	0.0049774	-0.0075169	-0.0023969	0.00026737	-0.0046376	-0.0017057	0.0010923	-0.0072684
Aspni5_42411	0.0083337	-0.0091083	-0.0041583	0.00056253	0.0018768	-0.004767	-0.0173	-0.003731	0.0076579	0.0025381
Aspni5_42365	-0.000628	0.00014766	0.0027746	-0.0001828	-0.0019202	0.0046352	0.011273	0.00073506	0.00086675	0.0084921
Aspni5_42340	0.0082023	-0.0012653	-0.0034491	-0.0002679	-0.0026921	-0.0052986	0.0027389	-0.011114	0.014077	0.019622
Aspni5_42320	0.018077	-0.004954	0.0045682	-0.015284	-0.0072195	0.0018931	0.0073915	0.016793	-0.0020762	0.01821
Aspni5_42319	0.014688	-0.010418	-0.0060412	-0.0092048	-0.01092	0.000171	0.0029454	-0.0072114	-0.0071065	-0.0087494
Aspni5_42318	0.0026042	-0.0031287	-0.0070537	0.0063437	-0.0027695	-0.010693	-0.011784	-0.0026869	0.01192	-0.0064508
Aspni5_42306	0.0027452	-0.01469	0.0046086	-0.0013859	0.0017176	-0.020573	0.015575	-0.011159	0.0094387	-0.016212
Aspni5_42282	-0.013131	0.0020383	0.014848	-0.011899	-0.017718	-0.0064082	0.0039455	-0.0052563	-0.0027391	0.0049439
Aspni5_42253	0.0020137	0.047149	0.029024	-0.0012648	-0.012853	0.03096	-0.0075165	0.017648	0.013083	-0.0001153
Aspni5_42251	-0.0062906	-0.0060134	-0.0038856	-0.0063359	0.0038822	0.0014164	-0.00064278	0.0054583	0.0055984	0.005358
Aspni5_42250	-0.0030693	0.0024431	-0.0017964	-0.0026469	0.0014286	0.0013781	-0.00079867	0.00092158	0.0068061	0.0014244
Aspni5_42246	0.0022375	-0.0039448	0.0015788	0.001249	0.0021268	0.0065996	-0.00088185	-0.0010252	-0.0008349	0.0023146
Aspni5_42244	0.0075864	-0.0017984	-0.0056571	-0.0033698	0.011086	-0.0046146	0.010612	0.0027387	0.010952	0.0087487
Aspni5_42243	-0.0031735	-0.0029925	0.0088506	0.010493	-0.0043054	0.0051573	-0.0090364	0.0045549	0.0057253	0.0010411
Aspni5_42242	0.0086536	0.010786	-0.0054696	0.020266	-0.012217	0.011234	-0.013695	-0.0010317	0.0065892	-0.0032388
Aspni5_42240	-0.011247	0.00090461	-0.0068084	-0.014772	0.0015532	0.0092217	0.00038214	0.015113	0.0063346	-0.0044807
Aspni5_42238	-0.0053114	-0.0034916	-0.030465	0.0081242	-0.018167	-0.0083951	-0.011196	-0.015073	-0.008484	0.0028597
Aspni5_42235	0.0041247	-0.0023124	0.00055583	-0.01245	-0.0057102	0.00039701	0.00093106	-0.004657	0.0089283	-0.0038091
Aspni5_42234	0.0083841	-0.0067092	0.0034999	-0.0015105	0.0039087	0.0075021	-0.0043198	0.0054453	-0.0035703	0.00020833
Aspni5_42232	-0.0011644	-0.005438	0.0080363	-0.021278	-0.020145	-0.007318	0.0047221	0.0093022	-0.0068166	0.026595
Aspni5_42231	4.7784e-05	-0.001089	-0.00098617	-0.00028143	0.0019425	0.0029146	0.00022441	0.0024189	0.0016406	0.0025818
Aspni5_42227	0.0048061	0.0027828	8.5734e-06	0.0077529	0.0003184	-0.0073231	-0.011578	0.0042953	-0.0033886	0.0010166
Aspni5_42206	0.0027097	0.0051476	0.007663	-0.0030898	0.0088732	0.0034833	-0.010925	0.0010736	0.0029122	0.0054453
Aspni5_42198	0.0032347	-0.002519	-0.00061434	-0.0035853	-0.0039733	-0.0082677	-0.012905	-0.0013143	-0.0026629	-0.0042974
Aspni5_42197	0.029242	-0.025234	0.0013597	-0.00084709	-0.0046984	0.011783	0.0061692	0.0057554	-0.021785	0.013832
Aspni5_42118	0.00052743	-0.00094834	0.0001427	-0.00047801	-0.0036067	-0.0016661	-0.0096356	0.0019172	-0.011318	-0.00094515
Aspni5_42073	0.0027424	-0.02029	0.0044256	-0.00015565	0.013366	0.0042476	-0.0014231	0.018754	0.0091589	0.0085568
Aspni5_42068	0.0069626	-5.9558e-05	0.00052163	-0.0064188	-0.0020162	-0.00085343	-0.0026098	7.7637e-05	0.0030327	1.2122e-05
Aspni5_42051	0.0043847	0.0048369	-0.0011323	-0.020187	-0.011396	0.0052314	-0.0022939	-0.015147	-0.0099017	-0.00084299
Aspni5_42045	0.0013593	-0.00025382	0.00029417	0.0025091	0.0029312	-0.0056684	-0.0015148	-0.0010029	0.0022902	-0.0086385
Aspni5_42044	0.0053817	-0.00098646	-0.0027294	-0.01464	0.0018551	-0.0051397	-0.0044159	-0.0022637	-0.0039337	0.0024013
Aspni5_42037	0.0015147	-0.0037977	-0.0053903	-0.0038669	0.0057398	0.0014165	-0.0038656	0.00046974	0.0026038	-0.00068143
Aspni5_42026	-0.0035841	-0.0077087	-0.00080134	0.0062024	0.00026614	0.0060373	-0.0042784	-0.010511	0.005643	0.0091255
Aspni5_41975	-0.0062017	-0.0041886	-0.0070741	-0.0135	0.0044179	0.001133	-0.005483	0.0050696	0.0012279	-0.0018094
Aspni5_41964	-0.010108	0.0018687	-0.0086976	-0.028336	0.010181	0.0015393	-0.011731	-0.0031154	0.0073864	0.018217
Aspni5_41901	0.00057836	-0.00026002	0.00069118	0.000701	0.0003772	0.0014308	0.0015807	0.0011728	0.00020442	-0.0014323
Aspni5_41899	-5.9718e-05	0.0019	0.0056087	-0.0026226	0.0016902	0.0034332	-0.0008104	0.0045075	0.0053004	0.0011594
Aspni5_41792	2.8211e-07	-0.0009565	0.0044732	-0.0020969	-0.0050148	0.0018669	-0.0066451	-0.0034262	-0.0020707	-0.00095475
Aspni5_41769	0.005586	-0.00048403	0.0018888	-0.0066615	0.0037335	-0.0033097	0.0010259	0.011752	-0.0048654	0.001664
Aspni5_41724	0.0020184	-0.0022987	-0.00035004	-0.022642	-0.0049766	-0.0093079	0.00050998	0.0053256	-0.01638	0.0025163
Aspni5_41688	0.010095	-0.0010936	-0.0070527	0.0044076	-0.0023117	-0.0019623	0.00068638	-0.00018072	0.0010496	-0.0031704
Aspni5_41618	0.0054689	-0.012674	-0.0011278	-0.0067592	0.010467	-0.0026059	-0.0055506	-0.00097096	-0.00033473	-0.0050212
Aspni5_41616	0.0026578	0.0013374	2.7795e-05	-0.0011807	0.0053863	-0.00021832	-0.003019	0.012215	0.00048861	-0.0017416
Aspni5_41606	0.0024932	0.0014851	-0.030689	0.013253	-0.029077	0.018755	-0.013347	0.0042677	0.012073	0.0055537
Aspni5_41547	-0.00047496	-0.0052364	-0.0047699	0.0028994	0.0096214	-0.011273	-0.00371	0.0064103	-0.0031173	0.0052882
Aspni5_41521	0.00065725	-0.0041555	0.00065549	-0.0043622	-0.0027388	0.0013228	0.0026108	0.0031967	0.0048536	-0.004264
Aspni5_41497	0.0055223	0.00049566	0.0020368	0.00083131	-0.0017848	-0.0020188	-0.0017339	0.0019226	0.0060168	-0.0048729
Aspni5_41449	-0.0044643	0.0012904	-0.0051996	-0.0074066	0.0086054	0.0045831	-0.0018068	-0.0018115	0.0043642	0.00034335
Aspni5_41442	0.002432	-0.0022257	-0.0011886	0.0037397	-0.0037521	-0.0016873	-0.011025	-0.0026854	-0.0036152	-0.0039325
Aspni5_41375	0.005708	-0.00053258	-0.0012823	0.0022844	0.019556	-0.0070774	-0.019402	-0.013351	0.014458	-0.0037123
Aspni5_41359	-0.0013281	0.0037102	0.0093287	-0.0085253	0.0046912	-0.00078524	0.0087641	0.0065153	0.018346	0.023239
Aspni5_41272	0.0049773	-0.0025236	0.0034158	-0.00060446	-0.0018277	-0.0011285	-0.0039905	0.0024175	0.0011705	-0.006885
Aspni5_41270	0.0088527	-0.017603	-0.0057457	-0.001287	0.0039068	-0.011969	0.00049938	-0.0043196	0.0054331	0.0029475
Aspni5_41269	0.011967	-0.0071909	0.015862	0.00022489	0.0023766	0.0061413	0.016329	0.008999	0.027602	0.0065392
Aspni5_41268	-0.0066858	0.0054974	-0.00081757	-0.0017158	-0.012214	-0.019894	-0.01984	0.026891	-0.0046546	0.0099993
Aspni5_41251	0.0074227	0.0016453	0.0015884	-0.0063596	-0.00071843	-0.0048825	0.0023152	-0.0027889	-0.00092691	-0.0067933
Aspni5_41250	-0.0020835	-0.0039827	0.011135	-0.0089393	-0.0077027	-0.0019714	-0.003414	-0.0026541	0.012199	0.0040302
Aspni5_41247	-0.0035862	-0.00066054	-0.0053026	-0.0018425	-0.0011389	-0.010307	-0.007725	0.0053071	0.0010587	0.0037311
Aspni5_41246	-0.0065816	-0.0058195	0.0095954	-0.0018169	-0.0070999	0.0052938	-0.011005	-0.0030699	0.012289	-0.0033025
Aspni5_41245	-0.0019789	0.00065635	-0.009613	-0.010849	0.011318	0.0084938	0.0097228	-0.013373	-0.0061371	0.012852
Aspni5_41242	-0.003344	-0.0043519	-0.00080572	-0.00046038	0.0032082	-0.014537	-0.016523	-0.0078458	-0.0074531	-0.0045386
Aspni5_41240	-0.00054078	8.3712e-05	0.00039629	-0.0015389	0.0012409	-0.0027759	0.0028447	-0.0018124	0.00096082	0.0021247
Aspni5_41237	-0.0020915	-0.00057406	-0.0011821	-0.0002537	0.0055059	0.0017798	0.0013838	0.00059187	-0.0037827	0.005463
Aspni5_41234	-0.0010889	0.00044514	0.00075576	-4.3607e-06	0.00035791	-0.0027764	-0.0071145	-0.0018693	-0.0040126	-0.0026017
Aspni5_41231	-4.4774e-05	-0.00081393	0.00023649	-0.0024097	0.0019968	0.00061735	-0.0013202	0.0033174	-0.00038718	0.002798
Aspni5_41227	-0.0010446	-0.0010999	-0.0021318	-0.00030945	0.0026556	0.0047256	-0.0018265	0.0054421	0.0036285	0.004488
Aspni5_41225	-0.011864	-0.0075857	-0.0012625	-0.0056501	-0.003161	0.014746	-0.004161	-0.0072388	-0.0045254	0.0019211
Aspni5_41224	0.0071299	0.0014548	-0.001736	-0.0069624	0.005776	-0.0017073	-0.0050315	0.0087914	0.011699	-0.0095833
Aspni5_41218	0.0024211	-0.0016733	-0.0053223	-0.0054585	-0.00030803	0.0059586	-0.014589	-0.0067231	0.0049443	-0.0071449
Aspni5_41216	-0.0016435	-0.0039611	-0.0012157	-0.0031809	0.001121	-0.0013625	0.00052111	0.002845	0.0024405	0.0023468
Aspni5_41214	0.0040448	-0.002085	0.0019023	-0.0061882	0.0011141	-0.003299	-0.0051821	0.0030502	0.00031136	-0.0046582
Aspni5_41210	0.0082474	0.0063007	-0.013563	0.0036905	0.0052457	-0.037751	-0.022931	0.0009576	0.016131	0.015515
Aspni5_41209	0.0043256	0.00092862	-0.0082697	0.0111	-0.0093443	-0.013192	-0.01819	0.0098018	-0.0031097	0.0045127
Aspni5_41205	-0.0078412	-0.02314	-0.0024693	-0.0017104	-0.014669	0.016994	-0.0057767	0.016455	0.010736	-0.0063653
Aspni5_41080	-0.0027812	0.0040764	0.00026172	-0.007681	0.0052717	0.0050181	-0.011373	0.0012157	-0.010391	0.013584
Aspni5_41078	-0.0014685	0.00063357	0.0034897	-0.0031787	0.00012324	-0.0054025	0.0024591	-0.0080098	0.010558	0.019531
Aspni5_41050	0.0057758	-0.0061262	0.00575	0.0022499	0.0091146	-0.014081	-0.0015324	0.010946	-0.0031903	0.025892
Aspni5_40936	0.0059485	0.0036574	0.0065848	-0.0015804	0.0017314	-0.0081115	-0.0059734	0.0023823	0.0069569	0.0024621
Aspni5_40909	0.013782	-0.0039081	0.0020232	0.003585	0.0003469	0.0021924	-0.00022766	-0.0017291	0.0014679	-0.0077044
Aspni5_40895	-0.00049165	-0.013948	-0.010383	0.0007451	-0.02717	-0.0048551	0.010703	-0.02333	0.039745	0.020449
Aspni5_40891	0.0018004	0.0070606	-0.020004	-0.02759	0.019253	0.0077508	-0.0054932	-0.018681	0.0023533	-0.0081784
Aspni5_40890	-0.002556	0.02003	0.016109	-0.011236	0.0027371	0.017123	-0.013836	0.0057034	0.021165	-0.0024153
Aspni5_40889	-0.020196	-0.0049432	-0.017238	-0.03994	-0.029213	0.0015466	-0.014561	-0.0075325	-0.054209	-0.0080357
Aspni5_40885	0.0097034	0.0061971	0.011039	0.0023941	-0.0072756	-0.0031389	0.00090457	-0.00091691	-0.002068	0.0033874
Aspni5_40883	0.011846	-0.00057242	-0.007192	0.0062746	0.0022504	0.013543	-0.012274	-0.0079939	-0.017964	0.016589
Aspni5_40868	0.0075739	-0.0065277	0.0022751	-0.0011931	-0.0054859	-0.0089915	-0.0084242	0.003191	-0.0074737	-0.0082057
Aspni5_40820	0.00071525	-0.015973	-0.0025008	-0.0095538	0.0050744	-0.02277	0.0011087	-0.0094949	-0.00054228	-0.0078243
Aspni5_40812	0.0084114	-0.011283	0.016359	-0.0078091	0.0038653	0.003609	-0.019871	-0.010106	0.010699	-0.0014637
Aspni5_40768	0.0054238	-0.0083456	-0.008289	-0.0022997	-0.0027536	-0.0016623	-0.0079651	0.0038344	-0.00074688	-0.0044433
Aspni5_40697	0.0092255	0.005884	0.00069155	0.0018821	0.0012641	-0.0019814	0.0074863	-0.0013466	0.0036397	-0.0087642
Aspni5_40665	-0.0023189	0.0043091	-0.0058925	-0.010415	0.0062281	0.002103	-0.017411	-0.0022312	0.0056935	0.011399
Aspni5_40652	-0.0023701	-0.01421	0.014786	0.0037341	0.0099637	0.015561	0.0067971	0.01639	0.025692	-0.0022256
Aspni5_40586	0.028362	-0.031749	0.016012	-0.00064785	-0.0055018	-0.00044514	0.001564	-0.011286	-0.010835	0.017433
Aspni5_40532	0.0042783	0.0013546	-0.00064225	0.0028106	0.0013942	0.005117	0.010399	0.0016541	0.0054873	0.0059209
Aspni5_40518	-0.00032561	0.0059881	0.0042912	0.0073801	0.0024778	-3.2307e-05	0.0031094	-8.6688e-05	0.0088272	0.0053895
Aspni5_40432	-0.016961	-0.015126	0.017249	-0.0026474	-0.0054472	-0.00013691	-0.015142	0.0037076	0.035489	0.012038
Aspni5_40388	-0.004021	0.0047069	-0.0052737	0.0011145	0.011421	0.0029168	-0.00044709	0.00015646	0.009812	0.0023565
Aspni5_40385	0.009876	-0.0014878	0.0036801	-0.0085025	0.010707	0.0059353	-0.022441	-0.014504	0.01258	0.0095533
Aspni5_40384	-0.0013847	-0.011046	0.016454	-0.014554	0.0056619	0.012967	-0.012484	-0.0031589	-0.011886	0.023282
Aspni5_40336	0.0019461	0.0034222	0.0078527	0.0024021	-0.0045148	-0.0056566	-0.0089764	0.00011366	0.0068967	0.0023797
Aspni5_40301	-0.0045568	-0.0027088	-0.0073066	-0.024417	0.010136	0.0055735	-0.0081114	-0.0035123	-0.0067222	0.0041369
Aspni5_40281	0.023982	0.0015894	-0.036193	0.0042258	-0.015376	0.012847	0.017846	-0.0077197	-0.012242	0.0081338
Aspni5_40280	0.025062	-0.027116	0.022435	0.0071802	-0.0027101	0.026481	0.009834	-0.0010688	-0.0069084	0.02477
Aspni5_40256	-0.017472	0.004738	-0.0071161	-0.023829	-0.0047722	0.0069722	-0.0018608	0.012888	-0.015072	0.016359
Aspni5_40240	-0.010934	-0.01919	0.0087325	0.018629	0.0058227	-0.010228	0.0067669	-0.0019581	-0.0028657	-0.010224
Aspni5_40229	0.0099694	0.0031195	-0.0025116	0.006641	-0.012355	-0.0015983	-0.0013744	0.0022747	0.0089317	-0.017564
Aspni5_40201	-0.0036029	-0.0032462	0.002362	-0.0057607	0.0064249	-0.0035799	0.0046602	0.0057042	-0.0025615	-7.8999e-05
Aspni5_40198	-0.0061299	-0.016994	0.0047606	-0.023937	-0.015455	-0.016472	0.023906	0.0031827	0.030474	-0.0014957
Aspni5_40197	-0.0063438	-0.035438	0.00084305	-0.0075813	-0.00023123	-0.036877	0.0035844	0.0054182	0.025803	-0.017895
Aspni5_40196	-5.8645e-05	0.00013935	-3.0585e-05	-0.00039561	-7.2007e-05	0.00025445	-7.2089e-05	-0.00014789	0.00051138	-0.00056276
Aspni5_40161	-0.0018356	-0.0063613	-0.0027667	-0.017866	-0.035221	-0.0094686	0.0080404	0.00031407	0.0035292	-0.0099558
Aspni5_40157	0.0065412	-0.0040508	-0.0093609	-0.00962	-0.0037124	0.0062614	-0.0017725	0.017452	-0.010581	-0.0019968
Aspni5_40151	-0.0026026	0.0016914	-0.0039984	-0.0073514	0.0044195	-0.0045192	0.0085208	0.0059172	0.0029996	0.009833
Aspni5_40148	0.0093569	-0.00045271	0.012619	-0.0053375	-0.002985	0.0031467	0.0017092	-0.013175	0.0024787	-0.0080175
Aspni5_40114	0.027946	0.017122	-0.0071861	-0.01711	0.0043235	-0.0043043	0.0073982	0.0002893	-0.0013432	-0.018236
Aspni5_40113	-0.0006155	0.0054382	0.0016907	0.014575	0.0059129	-0.0037213	0.014166	-0.016576	0.013381	0.0064898
Aspni5_40112	-0.00077153	-0.0017703	0.012168	-0.0071778	0.003523	0.012074	-0.0008596	0.0093979	0.012881	0.00082102
Aspni5_40111	0.0021123	-0.0049001	0.0085903	0.0012282	-0.0027252	0.0028661	-0.0069785	0.0060901	0.014526	0.012475
Aspni5_40075	-0.0060839	0.0049234	-0.0097793	-0.0036871	0.0046518	0.0076456	-0.0062021	0.00018538	0.0050938	0.0062076
Aspni5_40053	0.010748	0.0034212	-0.0044665	-0.0011516	0.0066901	0.0029512	-0.0063177	0.00949	0.0028272	-0.0028803
Aspni5_40040	-0.0030357	-0.0029412	-0.0013638	0.0023821	6.3465e-05	0.0013068	-0.010475	0.0046052	-0.002435	0.00046004
Aspni5_40039	0.0032306	-0.00083413	0.0073579	-0.0040886	-0.0086298	-0.010345	-0.0043649	-0.0040522	-0.0074884	-0.006878
Aspni5_39908	-0.012426	0.020758	0.012798	-0.018291	0.0062844	0.026594	0.012974	0.0040852	0.017642	0.0003474
Aspni5_39888	-0.0021039	0.003077	-0.010814	-0.0066244	0.0028086	0.00018816	-0.0068915	0.004157	0.00059461	0.0014825
Aspni5_39831	0.00086495	0.0050721	-0.0054158	-0.0010656	0.0014097	0.0068444	0.006808	-0.0021588	0.011029	0.0081584
Aspni5_39725	-0.002087	0.00021231	-0.00089284	0.00021858	-0.0054208	-0.013259	-0.018076	-0.00098523	-0.010184	0.013625
Aspni5_39638	0.00063193	-0.004285	0.0038922	0.008233	-0.0049386	-0.0001566	-0.0045129	0.002998	-0.0017348	-0.00046054
Aspni5_39517	-0.0050858	0.00042424	-0.012197	-0.024634	0.011797	0.017914	0.00072561	-0.014404	0.007569	-0.0034663
Aspni5_39408	-0.0038386	-0.0039454	-0.00057563	-0.0069776	-0.0017109	-0.0083808	-0.0077065	0.0022802	0.0017524	-0.0039956
Aspni5_39407	0.00039585	-0.0028445	-0.0060177	-0.013896	0.0036039	-0.0097399	-0.0098342	0.0043444	-0.0011958	-0.00059515
Aspni5_39387	0.0015773	0.0044062	0.0079116	0.0030582	0.0016213	-0.00060046	0.0020542	-0.0024656	0.0056956	0.0024187
Aspni5_39385	-0.00098571	-0.0027318	0.0028293	0.0031224	-0.002481	-0.0060465	-0.0025591	0.0070358	-0.0032399	-0.0025222
Aspni5_39382	0.003165	0.007181	0.0019997	0.0017891	0.00074858	-0.00030261	-0.0024143	-0.0085145	0.0088759	0.0060201
Aspni5_39381	0.0063471	-0.02184	0.0036829	-0.017697	0.015741	-0.00048194	0.0043758	0.0066767	-0.00039034	0.0047738
Aspni5_39348	-0.0020367	-0.0041939	-0.0037736	0.00029533	-0.002916	0.0064228	-0.0065807	-0.00086584	-0.0065518	-0.0041098
Aspni5_39347	0.00070437	-0.0019127	0.0031756	-0.0017248	-0.0051915	-0.00077616	0.0055791	-0.00139	0.0023141	0.0063868
Aspni5_39346	0.0072848	0.0042345	0.0083752	-0.00082133	-0.0014704	-0.003869	-0.0045189	0.0020027	0.0022929	-0.0082328
Aspni5_39335	0.003175	-0.018632	-0.0025004	-0.0011219	0.010538	-0.01209	0.0075231	0.013608	0.018262	-0.0054827
Aspni5_39334	0.0061951	-0.0021669	0.0048661	-0.0071675	-0.0030624	0.0072535	-0.01159	0.025141	0.0043487	-0.0016219
Aspni5_39333	0.0039275	0.0020907	2.9323e-05	-0.0059361	-0.0010878	-0.0053861	-0.0048805	0.007402	0.0061815	-0.011128
Aspni5_39322	0.00010746	-7.5844e-05	0.00078176	0.00023995	-3.2158e-05	0.00069591	0.00079459	0.0007296	0.00043973	0.0011456
Aspni5_39321	-0.011036	-0.021495	-0.004469	0.0069644	-0.0033576	-0.0067125	0.0067548	0.0047352	0.010077	-0.014868
Aspni5_39320	-0.0016417	-0.0014589	-0.0015407	0.00036057	0.0035473	-0.0043185	0.0057829	0.0031139	0.0022077	0.001893
Aspni5_39319	0.0076574	-0.0067997	0.0078251	-0.012168	-0.01461	-0.0022922	-0.0042702	-0.014774	0.00097332	0.00057357
Aspni5_39317	0.00067291	0.00050026	-0.00073578	0.0002917	0.0022041	0.00017615	0.0025977	0.00036181	-0.0045666	0.00039493
Aspni5_39253	0.0067712	-0.0037532	0.01326	0.005167	-0.005792	0.011443	0.016307	-0.0026338	0.0091667	0.026469
Aspni5_39238	0.0037648	-0.00073888	-0.023003	-0.014772	-0.033019	-0.0093776	0.021761	0.011374	0.02577	-0.017184
Aspni5_39194	0.0030091	0.00070163	0.0030581	-0.00035805	-0.0070657	-0.0026712	-0.00038566	-0.00051614	0.0027517	-0.00011975
Aspni5_39193	0.0078603	-0.00047862	-0.019759	-0.020254	-0.029846	-0.012256	0.019917	0.0098832	0.019077	-0.013395
Aspni5_39182	0.005229	-0.0072547	0.0065895	0.0030193	0.0033931	-0.0042888	0.015683	-0.0011365	0.017971	-0.007377
Aspni5_39151	0.013705	-0.019356	-0.02544	-0.015353	-0.026763	0.0097113	0.0071452	0.039528	-0.013966	0.024507
Aspni5_39143	-0.004062	-0.024773	-0.0089674	-0.012372	0.0039015	0.02488	-0.0027146	0.010415	-0.0036311	0.0058633
Aspni5_39134	0.0024925	0.0030278	0.00016989	-0.0043401	-0.0020873	-0.011809	-0.01001	-0.0042904	-0.0027582	0.011379
Aspni5_39105	0.0066467	-0.0015124	-0.00080249	-0.0060419	-0.007977	-0.00048965	-0.0042596	0.005278	-0.0092038	-0.0067728
Aspni5_39104	0.0087529	-0.0027972	0.0014711	-0.0032664	0.0038992	-0.0010688	-0.0015886	0.012698	0.0016902	-0.0014362
Aspni5_39103	0.00022759	-0.016982	0.0024694	0.00077606	-0.0013119	-0.0054259	-0.018981	0.0045019	0.0095896	-0.0025455
Aspni5_39016	0.018561	0.0057459	0.0010053	-0.0087475	0.0036758	-0.0051107	-0.006333	0.017735	-0.0069214	0.010584
Aspni5_39005	0.0045454	0.00087838	0.0039746	0.0088421	0.0066751	-0.0053294	0.021067	-0.0013046	0.0026808	0.010635
Aspni5_39004	-0.00043602	0.015602	0.0052871	-0.0032075	0.015865	0.0022822	0.0057858	0.0093076	0.0050057	0.01058
Aspni5_39002	-0.0014276	0.00038004	0.0048521	0.0025485	0.013204	-0.002615	-0.0018145	-6.2988e-05	0.0056899	0.0030777
Aspni5_38997	0.018973	-0.0031546	0.0034478	-0.0082522	0.017001	0.0098355	0.0070838	-0.011843	0.01169	-0.010605
Aspni5_38996	0.039697	-0.0087797	0.00051705	-0.012762	0.011516	0.012045	0.016638	0.017117	0.0037385	-0.0015446
Aspni5_38988	0.019475	0.0076411	0.0061455	0.006647	0.003059	0.00198	0.016273	-0.0027203	0.0054998	-0.0090769
Aspni5_38987	-0.0060186	-0.004729	0.010304	-0.0075975	-0.017435	0.0059384	-0.0014197	-0.015343	0.012278	0.024594
Aspni5_38974	0.0025392	-0.0017284	0.0031264	0.00041489	0.0014432	-0.00047719	-0.003755	0.0093	0.006752	-0.0052641
Aspni5_38962	0.0096438	0.0052539	-0.0034483	-0.0045896	-0.010326	-0.0034885	-0.0028858	0.0020297	0.0011625	-0.0072982
Aspni5_38893	0.0008185	-0.00049304	-0.00031066	-0.0016499	3.3918e-05	0.00011026	-0.0016017	-0.0017191	-0.00039612	0.0023942
Aspni5_38881	0.015965	0.0071327	0.017322	-0.0042724	0.007132	0.01254	-0.013806	-0.014878	0.0043802	-0.0090614
Aspni5_38842	0.01123	-0.015287	-0.012098	-0.005233	0.0078206	0.0010489	-0.0025537	-0.001194	0.0087627	0.0023659
Aspni5_38796	0.0088208	-0.001833	0.0011019	-0.0029665	0.0050308	-0.0055518	-0.0022191	0.010231	-0.0080064	-0.021053
Aspni5_38689	-0.0048945	-0.02432	0.024211	-0.0166	-0.016934	-0.049003	0.0096756	0.0066009	-0.012806	0.00043225
Aspni5_38687	-0.00053877	0.024706	0.0065056	-0.0177	-0.0077812	0.0071907	0.015083	0.01218	0.0065679	0.0036138
Aspni5_38686	0.009155	0.0058024	0.0066415	0.012476	-0.00017217	-0.004011	0.0079927	0.0058774	0.0070634	-0.0040796
Aspni5_38683	0.0073688	-0.00037144	-0.0013096	0.004458	-0.003655	0.0006693	-0.005345	0.0061001	0.0054101	0.00012918
Aspni5_38681	0.0018906	-0.0035748	7.5568e-05	0.0022256	-0.00050529	0.00066968	-0.0046786	-0.00057371	-0.0039669	-0.0017924
Aspni5_38680	-0.0068213	-0.019258	0.013669	-0.019876	-0.0012412	-0.014523	0.00049485	0.015889	-0.0028095	-0.0090767
Aspni5_38598	-0.00045975	-0.0065315	-0.005293	-0.0055624	-0.0036542	-0.0017259	-0.0084774	0.012883	0.002186	0.010837
Aspni5_38538	0.0027048	0.0030141	0.0065446	-0.0044958	-0.0026466	0.0016497	-0.0013107	0.0003859	-0.0045737	-0.001106
Aspni5_38486	0.0062138	-0.0077218	-0.0047084	-0.033472	0.0028054	-0.0024675	-0.033964	0.00082562	0.016997	-0.0010232
Aspni5_38420	-0.0024353	-0.010282	-0.016974	-0.01442	-0.00033772	-0.014966	-0.0124	0.014772	0.00032199	0.0029861
Aspni5_38411	-0.0023608	-0.0076013	0.0051059	-0.0012279	-0.010008	-0.0013837	-0.0045264	0.0011492	0.0001651	-0.0088334
Aspni5_38391	0.0084626	0.018389	0.010254	-0.0062018	0.0089952	0.015219	-0.0045172	-0.0035067	-0.01247	0.0115
Aspni5_38379	0.0016519	-0.00026545	-0.0055211	-0.011379	0.01086	0.020256	-0.037901	-0.0013251	0.033301	-0.014304
Aspni5_38301	0.0070081	-0.0070423	-0.0010121	-0.025909	-0.0035279	0.00017379	-0.0075209	0.01711	0.0026391	0.0081325
Aspni5_38201	-0.011849	-0.0059157	-0.003589	-0.019133	0.0092237	0.0055553	-0.0073658	-0.0097383	0.0039221	0.0013115
Aspni5_38197	-0.0054	0.0029932	-0.0087755	-0.0079962	0.0045444	-0.011644	-0.020806	-0.0098285	0.022412	0.015245
Aspni5_38196	0.0013436	0.0028454	0.00124	-0.0065514	0.0025549	-0.00059256	0.0058517	-0.0050061	0.0040949	0.0023393
Aspni5_38064	0.013947	0.0012214	0.0047809	-0.012525	0.0048191	0.00034673	0.0069473	-0.0068996	-0.0062792	-0.0029929
Aspni5_38060	0.0063929	-0.024027	0.0017006	-0.0030335	-0.020956	0.0082964	0.004137	-0.017881	0.006464	0.011927
Aspni5_38056	-0.0025059	0.0046216	0.0052695	-0.0091636	0.0076603	0.0023656	-0.0032096	0.017328	0.0057394	0.035855
Aspni5_38025	0.0085871	-0.0053397	0.0017235	-0.0012032	-0.0012262	0.002496	-0.0073554	0.0073533	-0.012352	-0.0075209
Aspni5_37969	-0.0020008	0.0032317	0.005111	-0.0052829	-0.0020655	0.009898	-0.0032478	-0.00028982	-0.011095	0.00582
Aspni5_37946	0.0052192	0.001118	-0.0028456	-0.0031149	0.012223	0.00025362	0.0071345	0.0029608	-0.00077441	0.0032731
Aspni5_37926	0.0050277	0.0014652	0.0085803	-0.0033092	-0.0017829	-0.0024785	-0.0074629	-0.00040192	0.0048536	-0.0021006
Aspni5_37922	0.0019571	0.0031505	-0.0084286	-0.0024361	0.0062853	-0.0086604	-0.02032	0.005493	0.0033025	-0.0048075
Aspni5_37920	0.011016	-0.0028675	0.0022438	-0.0024972	-0.0091515	-0.012927	0.0013647	-0.014842	0.026899	0.0048818
Aspni5_37877	-0.017425	-0.0081273	-0.0082064	-0.026725	0.00038554	0.013224	-0.0044274	-0.00092552	-0.015109	0.0078043
Aspni5_37807	0.0093782	-0.0064852	-0.013145	0.0017572	-0.0055987	-0.0007171	-0.010792	0.0015578	-0.0053539	0.011135
Aspni5_37801	0.0061205	-0.010801	0.0014546	0.004252	-0.027983	0.00040306	0.0072266	-0.0078676	-0.0056631	0.014465
Aspni5_37799	0.024701	-0.032568	-0.0033121	-0.00071551	-0.035933	0.0098674	0.0083613	-0.025093	-0.0094058	0.028383
Aspni5_37784	-0.0030657	-0.0050838	0.006028	-0.010674	0.0014331	0.0051947	-0.004646	0.0033416	0.018724	-0.0021916
Aspni5_37737	-0.0038405	-0.0029394	0.008763	-0.0072981	-0.013413	-0.019521	-0.00011256	0.0089871	-0.0069568	0.0080724
Aspni5_37713	-0.00031881	0.0028533	0.0026291	0.00073881	-0.0042697	-0.0068979	-0.0018383	-0.00066914	0.0068311	0.0098804
Aspni5_37664	0.0020008	-0.011493	-0.0069371	0.001769	-0.0065637	0.010161	-0.012736	0.018541	-0.0088495	-0.002305
Aspni5_37610	-0.015434	-0.0084967	0.0060028	-0.010795	-0.010283	0.0094423	0.0036501	0.019314	0.01053	-0.015333
Aspni5_37605	0.00010982	-0.0010602	0.00025763	0.0024709	-4.7298e-05	0.0015813	0.00051893	-0.0045977	-0.00054013	0.0017782
Aspni5_37590	0.0071004	0.00019415	-0.0081236	-0.00066178	0.014451	0.0056252	0.009387	-0.007676	0.0092327	0.011275
Aspni5_37548	0.03233	-0.027212	0.011199	-0.0044469	0.0018789	0.025767	0.0078068	-0.027603	-0.015779	0.012801
Aspni5_37547	0.0019509	-0.0019588	0.0084766	0.0078972	-0.0084274	-0.00082036	0.0012002	-0.0050371	0.0020739	-0.0032831
Aspni5_37535	-0.0019472	-0.007854	-0.0098673	-0.0098448	0.0037722	-0.0016807	0.0038614	0.0016938	-0.0046395	-0.00041139
Aspni5_37534	0.0011066	-0.0034583	0.00053075	-0.0013444	-0.0028955	-0.0033448	0.0019108	-0.0035243	0.0032033	0.0035085
Aspni5_37529	0.0046654	-0.0014958	0.0045564	-0.002977	-0.0020343	-0.0061363	-0.003594	-0.012743	-0.0095248	-0.0024939
Aspni5_37507	0.011316	-0.015266	0.0020151	0.002889	-0.0058401	0.00075697	-0.013822	-0.0057426	-0.010924	-0.020922
Aspni5_37494	0.012904	-0.0020303	0.0074765	0.0099706	0.0070873	0.0020581	-0.0022101	0.00041789	0.0112	0.00094266
Aspni5_37488	0.014401	-0.0033753	0.0074902	-0.0068016	0.017351	-0.0064913	-0.0027028	0.0093822	-0.00359	0.0093346
Aspni5_37425	0.0015725	-0.0051502	0.0033242	0.0023569	-0.0014979	-0.0026754	-0.0028915	-0.0050383	-0.0026383	-0.0028782
Aspni5_37420	-0.00037468	-0.0058915	0.0031275	0.0053621	0.0011866	-0.0034398	-0.0039224	-0.0023579	0.0015625	0.002538
Aspni5_37356	0.004355	-0.00065047	-0.0025822	0.003334	-0.00021146	0.002236	-0.0029925	0.0065996	0.0020156	-0.0043537
Aspni5_37349	0.0013903	-4.2369e-06	0.0032846	0.00077245	0.0041864	-0.0040839	-0.004025	0.0061497	-0.00075294	0.0028642
Aspni5_37346	0.0025112	-0.0021655	0.0036058	0.0069328	0.0072812	-0.0092863	-0.0069591	0.0073655	4.1997e-05	0.0049191
Aspni5_37302	0.0091831	-0.0013621	-0.00058349	-0.0015329	0.0023628	-0.003803	-0.0056406	0.0058321	-0.0027384	-0.002482
Aspni5_37300	0.015789	0.0055764	-0.0071314	0.0027276	-0.00053886	-0.00028125	0.0014095	0.0027147	-0.0095579	0.0032664
Aspni5_37299	0.0071555	-6.1699e-05	-0.0053212	-0.00061578	0.0016762	-0.0060334	-0.010246	0.0013711	-0.0042051	0.0035161
Aspni5_37289	0.0099092	0.0044216	-0.0014248	-0.0058247	0.0060346	0.0043386	-0.0054842	0.0023848	-0.0077253	0.00021012
Aspni5_37250	0.0025085	0.0028705	0.0025665	0.0022431	-0.00027588	-0.0032843	0.0022094	0.00033898	0.0095913	0.011164
Aspni5_37234	-0.0023603	-0.0075873	-0.0051033	-0.0005089	0.0043259	0.0074595	0.0047014	-0.00049921	0.015001	0.0013612
Aspni5_37229	-0.0060991	-0.008231	-0.0026539	-0.01305	0.0096972	-0.001089	-0.018012	0.010137	0.019879	-0.0077192
Aspni5_37221	0.010186	0.0027646	-0.0094831	0.0036519	0.010272	-0.0028699	-0.0089527	-0.0024534	0.0010586	-0.00021115
Aspni5_37205	0.012016	0.0014897	-0.0021989	-0.0042581	-0.002929	-0.006275	-0.0056359	0.001677	-0.0011265	-0.0091178
Aspni5_37201	0.0078416	-0.0078747	-0.0032854	-0.0011168	1.1458e-05	-0.0037324	8.5896e-05	0.0029608	0.0010614	-0.007834
Aspni5_37191	0.0077347	-0.001325	0.0084837	-0.002811	0.0030823	0.00059469	-0.0081099	-0.0022387	-0.0053973	-0.0030715
Aspni5_37185	0.012562	-0.00087644	-0.0092456	-0.0046274	0.020597	-0.0014588	-0.0047151	0.017509	0.00022115	0.00020942
Aspni5_37171	-0.0078728	-0.013667	-0.0050819	0.0021544	-0.011153	0.0098127	-0.017751	0.003816	0.015162	-0.0082518
Aspni5_37167	0.0031181	-0.0015003	-0.01131	-0.019087	0.012583	0.012113	-0.01118	0.010681	-0.0047348	-0.0066819
Aspni5_37151	-0.00024764	0.00093062	-7.0786e-05	-0.01153	-0.002776	-0.0014016	0.0095666	0.0037109	-0.0078045	0.013531
Aspni5_37149	-0.0086045	-0.0098854	0.001813	0.0086707	0.0047601	0.00927	-0.0022419	-0.00035891	-0.0041375	5.0822e-05
Aspni5_37122	0.0014095	-0.0049396	0.010015	0.0012284	-0.0059213	-0.00021473	-0.0059054	-0.0033531	-0.0034126	-0.0032702
Aspni5_37117	0.012636	-0.013657	-0.0015956	-0.0017032	-0.0022134	0.001547	-0.005648	-0.0049043	-0.010666	0.0002975
Aspni5_37104	0.0019522	-0.017074	-0.0050492	-0.020976	-0.004902	0.005928	-0.010506	0.012913	-0.01652	0.004343
Aspni5_37071	-0.0043247	-0.0051124	-0.01027	-0.0098787	0.011703	0.015222	-0.002077	0.00016419	0.0014118	0.000117
Aspni5_37058	-0.0012194	-0.0077966	-0.026318	-0.008609	-0.00092769	-0.018245	-0.023688	-0.0041566	-0.0092256	0.010866
Aspni5_37026	-0.0011124	-0.003168	-0.010693	-0.016622	0.015942	-0.00072552	-0.0077623	0.010275	-0.021864	0.024585
Aspni5_37016	-0.0039078	-0.00045437	-0.0057686	-0.0063812	-0.0093949	0.0039015	-0.018542	-0.022447	0.02879	0.020057
Aspni5_37000	-0.010948	-0.011078	0.0017278	0.00014798	0.0016029	0.0063501	-0.0043064	0.0055397	0.010817	-0.00021594
Aspni5_36979	0.0018887	0.0038129	-0.014949	-0.0085405	0.0083179	-0.0016772	-0.024397	-0.0033824	0.012081	0.0065031
Aspni5_36953	0.0092815	0.011205	0.0085753	-0.0064778	-0.0065574	-0.0012627	-0.025888	-0.0012333	0.0068529	-0.00027505
Aspni5_36932	0.0023835	-0.0052938	-0.0038295	-0.0125	0.0092041	-0.0087702	-0.010226	0.030048	0.011182	-0.00098614
Aspni5_36846	-0.0060801	-0.0077653	-0.010113	-0.022538	0.00024488	-0.0026239	-0.017926	-0.016393	0.0078144	0.0013388
Aspni5_36802	-0.0030123	-0.011587	-0.00039788	0.0010871	0.0092245	-0.0067002	0.00027368	0.0055177	0.012887	-0.0038803
Aspni5_36797	0.0013347	0.0058948	-0.0027938	-0.014768	-0.0022428	-0.00099971	-0.02514	0.0098226	-0.015949	0.012961
Aspni5_36796	0.0035784	-0.0016589	-0.0094471	-0.035093	0.0050506	0.010742	-0.011728	-0.0048385	0.020758	0.0031867
Aspni5_36768	-0.0018326	0.01068	-0.0034254	-0.0025433	0.01031	-0.0015825	0.0065478	-0.0036362	-0.0073782	0.026544
Aspni5_36751	0.016642	0.0072632	0.015325	0.0057897	0.0048403	-0.023157	-0.0081884	0.0071438	0.032508	-0.0090564
Aspni5_36723	0.0033062	-0.0043548	-0.0068891	0.0011422	0.0041169	0.0021695	-0.0086811	0.0012001	-0.0010773	-0.0021078
Aspni5_36692	0.006505	-0.0093072	-0.005283	-0.012787	0.010816	-0.022798	-0.024247	-0.0035587	0.027047	0.009965
Aspni5_36675	0.0029779	0.0031508	0.011035	0.0042972	-0.0027584	-0.0013481	-0.0019451	-0.00093794	-0.0032458	0.0014333
Aspni5_36588	0.01187	0.0032166	-0.00053783	-0.0070079	-0.0027916	0.0074651	0.016198	-0.015311	0.011272	-0.0055492
Aspni5_36584	0.015468	-0.0077656	-0.00341	0.0029434	-0.0026265	0.00052753	0.014314	0.012043	0.0026714	-0.0085623
Aspni5_36577	-0.00032012	-0.00076494	0.0050382	0.00010379	-0.00025089	-0.00040978	-0.00020705	-0.0044516	0.0012382	-0.00091416
Aspni5_36576	0.0015264	0.00092153	-0.0014312	-0.00302	-0.006539	-0.0077283	-0.0080575	0.0069034	0.0050649	0.001994
Aspni5_36575	0.0058531	0.0052792	0.0063345	0.014561	-0.0040037	-0.0070131	0.0025171	0.00366	0.020467	-0.012286
Aspni5_36574	-0.00017629	-0.0020664	-0.00075972	-0.0035054	-0.00089801	-0.0020017	0.0010227	-0.00046273	-0.0022506	-0.0021264
Aspni5_36573	-0.0027524	-0.00037823	0.0062457	-0.012335	-0.0078191	0.0044451	-0.020711	0.0043072	-0.004466	0.0015719
Aspni5_36572	0.014572	0.0039758	0.010533	-0.0048526	-0.0030864	-0.0045884	0.0061201	0.0050723	0.0096715	0.021137
Aspni5_36571	0.0046354	0.00021984	-0.00060618	0.0012678	0.0032199	-0.0020296	-0.0061231	0.0012487	0.0019951	-0.00089843
Aspni5_36569	0.0040891	-0.0019395	0.0056215	0.00022727	0.0051579	-0.0014261	-0.0085202	0.002991	0.0013856	0.00050484
Aspni5_36567	0.0038659	0.00065526	0.0011862	0.00051012	0.00095837	-0.0057367	-0.0049519	0.0037387	0.0036345	-0.00080848
Aspni5_36544	0.0076459	-0.0023009	-0.00064433	-0.0071146	0.0031372	-0.00072448	-0.0087932	0.0050916	0.0066689	-0.0039459
Aspni5_36536	0.0056083	-0.0055533	-0.00069082	-0.0030508	-0.012638	0.0058792	-0.015751	0.0065923	0.012454	0.0064875
Aspni5_36528	-0.012001	-0.014867	-0.010364	0.010171	-0.011544	0.025376	-0.013354	0.0052979	0.037736	-0.012552
Aspni5_36524	-5.786e-05	-0.00086175	-0.0036989	-0.0018001	0.0035641	-6.2554e-05	-0.0028053	0.0015838	-0.001069	0.0062437
Aspni5_36517	0.0054187	0.00027437	0.0023217	-0.00155	-0.0049178	-0.0020995	-0.002979	0.0027921	-0.0026801	-0.0054561
Aspni5_36462	0.0067704	-0.001196	0.0022387	-0.0023245	-0.00096327	-0.0048785	-0.0061069	-0.00043652	-0.0030792	0.00071547
Aspni5_36457	-0.0017781	-0.00067008	-0.0060648	-0.012165	0.0065019	-0.00094859	-0.0080045	0.001671	0.0031548	-0.0005738
Aspni5_36452	0.0036121	0.0029335	-0.0043556	0.004291	0.0040941	-0.0037122	-0.001031	0.0079596	-0.0027154	0.0012081
Aspni5_36448	-0.0015595	-0.011511	0.0024765	-0.0057519	-0.0086163	0.0013148	-0.0049674	-0.0070192	-0.00072311	-0.0042574
Aspni5_36446	0.0030551	0.00096175	0.0014169	0.00098534	0.0036695	-0.0029614	0.00099852	0.002881	0.0011673	-0.00089869
Aspni5_36440	-0.00024318	0.0015165	0.0046119	-0.0034995	0.006034	0.008739	-0.0029775	0.0057644	0.0020946	0.0012497
Aspni5_36438	0.011189	0.013037	-0.022043	-0.001017	-0.010298	0.033785	-0.01529	0.0054168	0.017026	-0.019667
Aspni5_36429	0.0018551	0.0017088	-0.0016334	-0.0028021	0.0084783	0.0014926	-0.0049282	0.0039473	0.0057662	0.0084092
Aspni5_36416	0.0013483	-0.0014927	-0.006365	-0.00098139	-0.012405	0.0029617	-0.0028327	0.0080845	0.016026	0.0013652
Aspni5_36411	0.020476	0.0065113	-0.0038121	0.010392	-0.0082336	-0.013532	-0.0022342	0.016048	0.0047302	-0.0013171
Aspni5_36406	0.0065223	-0.011291	0.0054409	-0.0028423	-0.0059623	0.0014721	0.0066751	-0.0012983	0.0055143	-0.00040055
Aspni5_36397	0.011284	0.0021874	0.0029451	-0.0041658	0.0010229	-0.0050533	-0.0035923	0.00053619	-0.0057469	-0.0051787
Aspni5_36391	0.0046058	-0.0055103	-0.0018471	-0.0034439	0.0028772	0.009578	-0.018615	0.012937	0.0043292	-0.013892
Aspni5_36389	0.0067605	-0.0065435	8.3371e-05	0.013027	0.0077347	-0.018388	-0.00060419	0.020937	0.011874	-0.0028557
Aspni5_36382	0.013877	-0.00092281	-0.010925	0.02084	-0.0026037	0.012422	-0.0088286	0.020253	0.031683	-0.011413
Aspni5_36381	0.0021998	-0.0040271	-0.042171	-0.0010765	-0.050387	0.042244	-0.007332	0.01055	0.045313	-0.025684
Aspni5_36358	0.0016401	0.0012396	-0.00010646	0.00028868	0.0020189	-0.0044528	-0.0048863	-0.0017917	0.0089212	0.0040034
Aspni5_36353	0.0024103	-0.0016218	-0.0049849	-0.0029251	-0.0034291	0.0061882	0.0024835	-0.0021952	0.0049447	-0.0010143
Aspni5_36350	0.025373	-0.017891	-0.0048858	0.007236	-0.0033787	0.014016	-0.0071566	-0.0057581	-0.0072567	-0.011583
Aspni5_36348	0.0087795	0.0024175	0.0090761	0.0023983	-0.0018669	-0.0035031	-0.0041672	-0.0011657	0.00081357	-0.00083475
Aspni5_36297	-0.011273	0.0083259	-0.00028128	0.015174	0.00052526	0.012419	0.015259	-0.01573	0.0294	0.01196
Aspni5_36288	0.000954	-0.0001991	0.0020716	0.0011722	-0.004036	-0.0052426	-0.0090887	0.0037988	0.00067731	-0.0080083
Aspni5_36270	-0.0027547	-0.0003896	-0.0022675	-0.011826	0.010655	-0.0090131	-0.011093	0.0033469	0.018225	-0.0024158
Aspni5_36244	0.0096856	0.010983	0.0045859	0.0002767	0.0048673	-0.0020897	-0.001764	-0.0016573	0.0059559	0.0061972
Aspni5_36208	-0.0049073	-0.0028134	-0.010053	0.00063447	0.0076876	0.0098476	-0.012141	0.0070606	0.0020435	0.0050371
Aspni5_36203	0.0040595	-0.0043273	-0.0072588	-0.0022594	0.010218	0.0094051	-0.0096657	-0.011829	0.013173	0.013797
Aspni5_36195	0.0054206	0.0042116	0.0067666	0.00082703	0.00092925	-0.0023357	0.0032241	0.0030003	0.0062479	-0.0042374
Aspni5_36153	0.004462	-0.014311	0.011739	-0.0078089	0.00069347	-0.023088	-0.026003	0.01186	0.021757	0.013644
Aspni5_36150	0.0021092	-0.0026169	-0.0012022	-0.0061276	-0.0016115	-0.01068	-0.013436	0.0031022	0.0030392	-0.0027957
Aspni5_36119	0.0049666	-0.00036898	0.002707	-4.78e-05	-0.0062468	-0.0030847	-0.010248	0.0041836	-0.0087077	-0.0052716
Aspni5_36045	0.0025184	4.9085e-05	0.0075016	0.0056725	-0.0036164	-0.0014763	-0.0071126	0.0049613	0.0020371	-0.0049608
Aspni5_35999	0.0093355	-0.01961	0.017418	-0.026531	-0.0088923	-0.0026359	0.012399	0.028283	-0.022894	-0.0066064
Aspni5_35913	0.0033231	-0.0022185	-0.0047256	-0.024796	0.0088127	0.010243	0.0052247	-0.015694	0.020776	-0.019031
Aspni5_35911	0.023849	-0.0076456	-0.0078564	-0.0075354	-0.014669	-0.012379	0.00057203	0.015829	-0.0033743	0.036746
Aspni5_35835	0.0023254	-0.01101	0.0069479	0.00096285	0.00018768	0.0043161	-0.012099	-0.0036099	0.015022	-0.0032075
Aspni5_35819	0.0070565	0.0031013	-0.0013278	-0.012818	0.011831	0.0081696	-0.01069	0.011892	0.0020344	0.00053398
Aspni5_35792	0.0024056	0.0051229	0.0029702	-0.017672	0.0038773	-0.0031565	0.0014603	-0.0016165	0.014729	0.0014111
Aspni5_35781	0.010772	0.013833	0.0093278	-0.012924	-0.0049976	-0.0034492	0.0002066	-0.0018993	-0.0030449	-0.01148
Aspni5_35773	0.00018738	0.00118	0.0035153	-0.00061933	0.0078757	0.0092342	-0.013073	0.0055686	0.014587	-0.0018581
Aspni5_35746	0.00063934	-0.0096844	0.010841	0.0034934	0.0042336	0.0017069	-0.0034104	-0.0116	0.024138	0.012105
Aspni5_35737	0.01732	-0.0031236	-0.0027011	0.0010946	0.010033	-0.018512	-0.018526	0.010746	0.00013108	0.0047568
Aspni5_35718	-0.0021074	-0.0058968	0.0096043	-0.00059416	0.0022203	-0.0050169	-0.0084523	0.0056044	0.0091452	-0.0028978
Aspni5_35611	-0.0044889	0.014594	0.0079699	0.005715	-0.0026087	0.018551	0.0056631	-0.026214	0.013568	-0.006274
Aspni5_35600	0.0046479	0.0025107	0.0055002	-0.0069905	-0.0024097	-0.001598	0.0023141	-0.0035952	-0.0011757	-0.0025482
Aspni5_35591	-0.0060482	-0.0039369	0.0039988	-0.0090992	3.7489e-05	0.0067428	0.012126	-0.0082357	0.0078243	0.0082225
Aspni5_35469	0.0073141	-0.00074612	-0.00020044	-0.0052796	0.0072017	-0.00010168	-0.0025503	0.0069237	-0.0080907	-0.0087636
Aspni5_35446	0.0025387	0.0033179	0.0097414	0.0041983	0.0044593	-0.0040422	0.002414	-0.0020593	0.0081748	0.0076893
Aspni5_35424	0.010271	0.0075248	0.0089982	-0.009914	0.0025831	0.013262	-0.014829	0.0055306	0.013701	-0.0013752
Aspni5_35423	0.0036057	-0.0032998	0.0063941	-0.007976	-0.0064881	-0.0073047	-0.0099912	0.0050967	0.00027903	-0.0085029
Aspni5_35401	-0.026965	-0.01519	0.0092698	-0.020282	-0.019849	0.0038987	0.00037238	0.016899	-0.013015	-0.0049412
Aspni5_35382	0.0029468	0.0022264	0.0020185	0.0018977	0.0045037	0.00085421	-0.0027527	-7.227e-05	0.0045631	-0.0021838
Aspni5_35365	0.0439	-0.039809	0.0052209	0.0018295	0.00058935	0.016483	0.0067803	-0.0005308	-0.036256	0.023173
Aspni5_215145	0.0021265	-0.01683	0.025796	-0.027867	-0.017241	-0.0074296	-0.0016513	0.015555	-0.028728	0.018934
Aspni5_215134	0.00017821	0.0012138	0.0036415	0.0025218	0.00083365	0.0047011	-0.0035355	0.0016976	-0.0016836	0.0019892
Aspni5_215132	-0.0045111	-0.0035088	0.0031248	-2.627e-05	0.00071041	-0.0017917	0.00019593	-0.0035817	-0.00020965	0.0013162
Aspni5_215131	0.00572	-0.0047034	0.0083765	0.0020477	0.00074114	0.0059009	-0.0080709	-0.00045853	-0.0018998	-0.0031032
Aspni5_215121	0.015976	0.0051861	-0.0026664	-0.0057751	-0.008356	-0.0040738	0.0083296	0.0090079	-0.0015766	0.019118
Aspni5_215120	-6.2684e-05	0.001163	0.0069705	0.0018545	-0.0024913	-0.0030914	0.0023	-0.0024785	0.0054732	-0.00069781
Aspni5_215118	0.0094693	-0.010734	0.0014244	-0.001463	-0.0099885	-0.0091704	0.0080195	-0.0021445	0.01168	-0.014079
Aspni5_215117	0.0030932	0.0027152	0.00033519	0.0019833	0.0049326	-0.0042574	-0.0050876	0.0024675	0.0011819	-0.0001597
Aspni5_215114	0.0027612	0.0039949	0.0012725	-0.011434	-0.015212	0.0025173	0.00052212	0.0081897	0.0056976	-0.0053263
Aspni5_215113	-0.0023542	-0.0046488	0.0039542	-0.0048498	-0.0026701	-0.00089044	-0.004841	-0.013688	0.0094975	0.0049426
Aspni5_215103	0.00063195	0.0037069	-0.00904	-0.0041705	0.0053426	0.0071437	-0.0055987	0.0046829	-0.0031712	0.0053481
Aspni5_215101	0.00076554	-0.0023197	0.0036054	0.0045264	-0.0021331	-0.0034168	-0.0030111	-0.0017805	0.00021627	0.0035476
Aspni5_215100	0.0021479	0.0019534	0.0027443	0.0096246	0.0025212	0.0035277	0.004125	0.011067	0.0012714	0.0069132
Aspni5_215099	0.0013336	-0.00037059	0.0056519	-0.0041186	0.0012359	-0.0037703	-0.007774	-0.00037019	0.0027678	0.00038621
Aspni5_215096	0.0016699	0.0037916	0.0086534	0.00040919	-0.012131	0.0014101	-0.0078596	-0.011994	0.0038183	-0.0055236
Aspni5_215095	0.0023267	0.0048174	0.0055914	0.0062725	-0.0066652	0.0021849	-0.0011527	-0.0089168	0.0081312	-0.00051239
Aspni5_215094	0.0013054	0.0031084	-0.00057283	0.0026131	-0.0045867	-0.0082606	0.0028134	-0.0036141	0.010111	0.00015693
Aspni5_215093	-0.0017679	0.0030632	0.0048102	0.0030111	0.0049414	-4.0591e-05	0.0052145	-0.002482	0.0086607	0.0063601
Aspni5_215086	0.00046663	0.0028541	0.00015676	0.00095782	-0.0055936	-0.0052994	0.0098849	0.00063041	-0.0024696	0.00061197
Aspni5_215084	0.0015386	-0.0047329	-0.00011095	-0.0033503	-0.00063867	-0.0021108	-0.0084173	-0.0010813	-0.0040836	-0.0012987
Aspni5_215075	0.00065999	0.0039415	-0.001561	0.0047869	0.0027195	-0.0048499	-0.001455	0.0065201	-0.00081295	-0.00073266
Aspni5_215074	0.017096	-0.0097888	-0.0073189	0.0083526	0.010142	-0.011227	-0.016686	0.003033	0.00044156	0.0061001
Aspni5_215073	0.00084387	0.0019519	0.00012647	0.0024323	0.0043652	0.0022756	-0.0008043	0.0017021	0.005303	-0.00043531
Aspni5_215069	0.014	0.00023144	0.00025574	-0.006666	0.0029669	-0.0085257	0.0021603	0.00053664	0.0011125	-0.0069302
Aspni5_215061	0.011556	0.011729	0.0078758	-0.004138	-0.006035	-0.0022001	-0.0037413	0.0028903	0.0053881	-0.0059321
Aspni5_215059	0.0013095	-0.0020537	-0.0049221	-0.0082963	0.0062919	-0.0053702	0.0095709	0.0032668	0.017864	0.0097828
Aspni5_215057	-0.0060444	-0.0023424	-0.0037029	-0.039935	0.003438	-0.029704	0.019716	-0.017774	0.025282	-0.0037304
Aspni5_215052	-0.0050358	-0.0079802	0.0019314	0.0023483	-0.0037128	0.00079348	-0.0020453	0.00074124	-0.0025555	0.0021131
Aspni5_215051	-0.0003341	-0.0003186	0.0040067	0.0018702	-0.0017208	0.00040929	-0.0022007	-0.0039415	-0.0014086	-0.0049345
Aspni5_215050	-0.00039778	0.0028475	-0.028863	0.0095974	-0.021753	-0.011572	0.00488	-0.019196	0.013644	0.01202
Aspni5_215047	-0.00066202	-0.00067933	0.0026264	-0.0027519	-0.0029655	-0.001288	-0.0056555	-2.2667e-05	-0.0016036	0.0010466
Aspni5_215046	0.0075747	0.0027882	0.0022454	-0.0033014	0.00039508	-0.0034891	0.00044571	0.0040758	0.0062324	-0.0061087
Aspni5_215045	0.0022823	0.0029657	-0.0027061	0.0017439	-0.00044958	-0.0085792	0.0049629	0.0044214	0.01107	-0.0053176
Aspni5_215044	0.0042201	0.001256	0.011295	0.0068041	-0.0052339	-0.0016534	-0.00081167	-0.0050966	0.0018577	0.00052536
Aspni5_215042	0.0020313	-0.0030231	0.0070122	0.0013529	-0.0030401	-0.0040898	-0.0045884	0.0030899	-0.0025193	-0.00016783
Aspni5_215025	0.0054604	0.00027052	0.0034772	0.0030698	-0.002388	-0.0055699	-0.0052245	0.00073799	-0.005873	-0.0016007
Aspni5_215024	-0.0051346	-0.0060688	4.8247e-05	-0.0081394	-0.0049408	-0.00036881	0.012724	-0.013367	0.0095324	-0.0034019
Aspni5_215023	0.01275	-0.00284	-0.0046752	0.014376	0.010543	-0.0088327	0.001414	-0.020585	-0.0086823	0.0041159
Aspni5_215015	0.0055745	-0.002916	0.0059902	0.0042374	0.0085702	0.0048054	-0.003042	0.0049529	0.0066094	0.0012385
Aspni5_215013	0.0085487	0.011821	0.0046794	-0.0079432	0.0041746	-0.0037404	-0.0041459	0.0073116	0.0038548	0.0058668
Aspni5_215002	0.011697	-0.012495	0.0041683	-0.015279	-0.011645	-0.0028213	0.012922	0.022678	-0.024071	0.011029
Aspni5_214995	0.00024244	0.00039617	0.0019018	-0.0033978	0.0034503	-0.0035506	-0.0020013	0.0027055	0.00099469	0.002545
Aspni5_214976	0.0040881	-8.7517e-05	0.0058454	0.001989	-0.0010647	-0.0032681	-0.001659	-0.0029229	-0.002734	-0.0030474
Aspni5_214748	-0.0076125	0.0016386	0.0040872	-0.0060424	-0.006786	-0.0069591	-0.0033277	-0.010767	-0.001256	0.0016733
Aspni5_214740	-0.0033715	-0.018984	0.0032404	-0.012256	-0.014752	-0.019637	0.030737	-0.0062398	0.0031114	0.012337
Aspni5_214738	0.0045756	0.0011834	0.0044871	-0.010335	-0.012763	-0.0053864	0.0077599	-0.0067652	0.010066	0.0067378
Aspni5_214735	0.0049317	-0.0083932	0.0058977	-0.012589	-0.00868	-0.011175	0.013167	-0.013607	0.010907	0.011982
Aspni5_214667	0.0081025	0.0096296	-0.0019948	0.0034584	0.0013556	-0.0045213	-0.0028352	-0.0066404	0.001509	0.0012397
Aspni5_214632	0.0057373	0.0046524	0.006607	0.0035137	0.0051086	0.010202	-0.010129	0.0014922	-0.0016703	0.0056949
Aspni5_213915	0.0020129	0.0025199	0.0045169	-0.00022089	0.00048128	-0.0019448	-0.00064557	-0.0014157	-9.602e-06	0.0022671
Aspni5_213914	0.0088845	0.0030687	-0.001306	0.0023206	0.00068186	-0.0076284	0.0016287	0.0012535	0.0026838	-0.0059712
Aspni5_213911	0.0031504	0.0071489	0.024029	-0.0077686	-0.0062561	-0.003164	-0.0019127	-0.006549	0.0054145	0.0015959
Aspni5_213634	0.0028915	-0.001123	0.0028028	-0.00073191	-0.00019701	-0.003878	-0.007142	0.0010543	0.0024378	-0.0027379
Aspni5_213288	0.0054311	0.0077632	0.0028361	-0.0064691	-0.0076631	-0.0061436	-0.0031489	-0.0085186	-0.0052119	-0.0054909
Aspni5_212733	-0.0013415	-0.0033062	0.0020457	0.0029285	-0.0016766	0.0077443	0.0049684	0.0017548	0.00016579	0.004267
Aspni5_212618	0.0040842	0.011715	0.0093862	0.0065323	0.012599	-0.0047702	-0.0088075	0.0075716	0.0073064	-2.4579e-05
Aspni5_212456	-0.0020125	-0.0010916	-0.0056918	-0.00094924	0.010997	0.0013394	0.0019278	0.00072249	0.0030099	0.00086915
Aspni5_212427	0.0087516	-0.0039888	-0.0022423	0.004139	0.0088733	-0.0016122	-0.0026363	0.017942	0.0033445	-0.001493
Aspni5_211885	-0.028123	-0.023857	0.021762	-0.013957	0.0052083	-0.021464	0.0075361	-0.0018872	0.016889	-0.0013971
Aspni5_211877	-0.027445	-0.018132	0.023314	-0.017837	0.00064493	-0.028187	-0.0054712	-0.0062748	0.0039177	0.0040701
Aspni5_211875	-0.0096008	-0.017942	0.013156	-0.01084	0.0089627	-0.033077	-0.0025334	-0.0098091	0.0015216	-0.0054534
Aspni5_211749	0.0055282	0.001064	0.0022097	-0.0013629	0.0010401	-0.0020732	-0.0087722	0.0019368	0.0043424	-0.0029038
Aspni5_211738	0.0045434	0.00010499	0.0029169	-0.0013736	0.00076295	-0.0046697	-0.0068896	0.0030696	0.0037566	-0.003482
Aspni5_211733	0.0040103	-0.00084235	0.0020142	-0.0028896	-0.0002674	-0.0053925	-0.008085	0.00096807	0.0020756	-0.0022958
Aspni5_211700	-0.0034017	0.0021992	-0.012345	-0.0081712	0.017774	0.0011512	0.010432	-0.0052071	0.00025526	0.010062
Aspni5_211509	0.0052884	0.0069485	0.0021518	0.0031742	0.0041773	-0.00058064	-0.0031832	0.0051449	0.0017951	0.0001735
Aspni5_211094	-0.0024002	-0.0012047	0.0019993	0.0092514	-0.00068948	0.0032198	-0.0060939	0.00027665	-0.0008447	0.0079599
Aspni5_211085	0.0024001	-0.002615	0.001499	-0.00083781	-0.00041956	-0.0027783	-0.0012767	-0.00061209	0.0028075	0.00073257
Aspni5_210994	-0.001203	-0.02028	-0.00094615	-0.0054605	0.00020772	-0.0060808	0.0058842	0.0099152	-0.0092915	-0.0041454
Aspni5_210700	-0.026158	-0.011609	0.0047702	0.0044053	-0.013779	0.012064	-0.0041028	0.0087972	0.0079366	-0.0013582
Aspni5_210672	0.013426	0.014437	-0.019696	-0.00048065	-0.023182	0.011715	-0.0024469	0.004788	0.014511	-0.013918
Aspni5_210577	-0.0020572	-0.002096	-0.0089128	0.00033999	0.014571	0.0028024	0.0067215	-0.00056449	-0.00030389	0.008399
Aspni5_210217	-0.0061822	-0.012047	0.015726	0.003173	-0.015845	-0.00060197	0.012956	-0.0069231	0.014302	0.023302
Aspni5_209924	0.0033199	-0.0020195	0.0009603	-0.0013789	-0.0016919	-0.00030524	-0.0046668	-0.000967	-0.0024503	-0.0023799
Aspni5_209921	0.0010636	-0.0054544	-0.0018727	-0.0022343	0.00036595	-0.0029546	-0.0078271	-0.0012159	0.00067268	0.0010741
Aspni5_209919	0.0026764	-0.0014631	0.0020683	-0.0046457	0.00065878	-0.0024091	-0.0086043	6.8374e-05	0.0020001	-0.00036308
Aspni5_209696	-0.0007485	0.0004642	-7.6915e-06	-0.0068173	0.011245	0.0051293	0.0087437	0.0057956	0.0012628	0.0036798
Aspni5_209282	-0.0015332	-0.00061172	-0.00053118	0.0025498	0.00092349	0.004877	-0.0052046	0.00018454	-0.0046741	0.0005899
Aspni5_209279	-0.007958	-0.0090258	-0.0016779	0.0039446	0.0067877	0.0066826	0.0028168	-0.0022657	-0.0041667	0.0076349
Aspni5_209234	0.0017232	-0.0054506	-0.0041058	0.001957	-0.0038917	-0.00010482	-0.0026658	-0.0017794	-0.0047138	-0.0024976
Aspni5_208771	0.0020122	0.00083776	0.0055483	0.00098688	-0.00044035	-0.00075709	-0.005324	-0.00097656	-0.0020952	0.00034435
Aspni5_208562	0.0012908	-0.0055259	0.00089156	-0.0090077	0.0019303	-0.0047654	-2.4814e-05	0.0013208	-0.0015945	-0.0038823
Aspni5_208521	-0.0099507	-0.026024	0.014541	-0.027806	-0.021639	-0.03729	0.015296	0.0021384	-0.017388	-0.0027465
Aspni5_208246	0.0099281	-0.010724	0.010873	0.0018073	0.0076536	0.0080512	0.0019896	0.003904	-0.00066277	-0.00016465
Aspni5_207460	0.0034609	0.0039632	-0.0046835	0.0012231	-0.0045009	-0.0099875	-0.0047114	-0.0036142	-7.466e-05	0.0086627
Aspni5_207353	-0.0022599	-0.0042857	0.00010208	0.001207	0.0057537	-0.00027692	0.0078871	0.0014842	0.010532	0.0049455
Aspni5_207048	0.0030741	0.0017723	0.0048046	-0.0054137	-0.012293	0.00212	-0.00086641	0.00046035	-0.0035697	0.0016205
Aspni5_206422	0.0050597	0.0073539	-0.022116	-0.0027814	-0.029695	0.018558	0.0034038	0.022164	0.00088265	0.013817
Aspni5_206358	-0.0012333	-0.0094941	0.0033594	-0.010078	-0.0046025	-0.010424	-0.0031326	0.015009	0.0087941	-0.013857
Aspni5_205573	0.0059857	0.0087286	0.0080344	-0.0033721	-0.0019817	-0.00068188	0.0005145	0.0081005	-0.0015311	0.0025385
Aspni5_205431	0.0028286	0.0049245	0.00063988	-0.005757	0.0070716	-0.0021968	0.0073326	-0.0019254	0.002816	0.0034611
Aspni5_204582	0.003791	-0.0034845	0.0019512	-0.0041401	-0.001807	0.00037206	-0.0088126	-0.0017939	-0.0025149	-0.0032922
Aspni5_204572	0.0038702	-0.0045988	0.00075126	-0.0027421	-0.0011365	-0.0038611	-0.0071889	0.00027412	-0.0021128	-0.0038102
Aspni5_204514	0.00015934	0.0021839	0.0021577	0.0014642	0.0024226	-0.0014494	-0.00017719	-0.0032283	-0.00029609	0.0018181
Aspni5_204505	0.00072183	-0.0030506	-0.00098598	0.0030948	-0.0021213	-0.00045194	-0.0067502	-0.0026239	-0.0051386	-0.0017696
Aspni5_203823	-0.00068221	-0.00064454	-0.0013144	-0.004746	0.0017817	9.5269e-05	0.0034658	-0.00083456	0.0039516	-0.00169
Aspni5_203785	0.00034711	0.0041603	-0.012452	-0.017844	-0.018747	-0.011971	0.01316	0.013571	0.012214	-0.0097124
Aspni5_203715	-0.0025395	0.00064309	0.0022948	0.0012539	0.0017082	0.00011058	-2.2965e-05	-0.0038889	-0.0022145	0.0035768
Aspni5_202763	0.0053601	-0.002826	-0.0018302	-0.0043288	-0.00094077	-0.0018826	-0.0087637	-0.0021402	-0.0040845	-0.0027434
Aspni5_202668	0.0014162	0.0068646	0.012227	-0.0087788	-0.0082651	-0.00089335	-0.0033688	-0.0083879	-0.00047128	0.00066789
Aspni5_202206	0.0030086	-0.001225	0.0061072	0.0026605	-0.0062172	-0.0017084	-0.0090067	-0.0023969	-0.0006362	-0.0037177
Aspni5_202202	0.0025022	0.00011215	0.0059703	-0.0020748	-0.0017751	-0.0019446	-0.0049227	0.0013463	-0.0028441	0.00015428
Aspni5_201740	-0.00098077	-0.0029194	0.0013428	0.0056232	0.00082184	0.00043484	0.0024312	-0.0022479	0.0027897	0.0019611
Aspni5_201280	-0.019792	-0.0051194	0.010312	0.0038948	-0.0099844	0.0073064	0.00026789	0.0017275	0.010427	-0.010914
Aspni5_200992	0.00028919	0.0021931	0.0096184	-0.0017942	-0.0024509	0.0046148	-0.0019285	0.0021192	-0.0040684	0.0015873
Aspni5_200329	-0.01017	-0.0058148	-0.0017098	-0.0015495	0.0070895	0.008509	-0.002818	-0.005475	-0.0028986	0.0092155
Aspni5_200307	-0.00014529	-0.0016663	0.0040315	-0.010274	0.0097539	0.01244	-0.010958	0.014059	0.013843	0.0019938
Aspni5_199457	0.0042368	-0.00095526	0.00070728	-0.0075245	0.0034676	-0.0083222	-0.0069814	0.012221	0.002741	-0.0073867
Aspni5_199104	0.0037929	-0.0031272	0.00036121	-1.3381e-05	-0.002411	3.5902e-05	-0.0053873	-0.0028015	-0.0041871	-0.0024804
Aspni5_197971	0.0065316	-0.011984	0.00050798	-0.01122	-0.00023347	9.8777e-05	0.0015537	-0.0019326	0.0034007	0.0026144
Aspni5_197915	-0.0052078	-0.0046232	0.0095238	-0.0083451	-0.0065235	0.0041646	0.0075103	0.010932	-0.0032706	0.0097986
Aspni5_197588	0.0096136	0.011826	0.00073876	-0.008359	-0.013054	-0.00089931	-0.00074571	-0.0029553	-0.001018	-0.0066851
Aspni5_195786	0.009521	-0.0097589	0.0035578	-0.011092	0.012026	0.010809	0.0040518	0.0085773	-0.021028	-0.025838
Aspni5_195725	0.013732	-0.028305	0.008994	-0.026783	0.018206	0.018091	0.005381	0.016348	-0.023832	-0.033966
Aspni5_195344	0.0064778	-0.0016886	-0.00060717	-0.0024219	0.0022038	-0.0052342	-0.0092735	0.010622	-0.0030031	0.0086268
Aspni5_195322	0.028393	-0.030454	0.014401	-0.0036411	0.0058523	0.020544	0.0037574	0.0020853	-0.0045356	0.0090513
Aspni5_195271	-0.0035937	0.0034779	0.00559	0.0011117	-0.019677	-0.01003	0.0035386	-0.010628	0.0065089	0.020896
Aspni5_195129	0.00077889	0.0011787	0.0046192	-0.0052623	-0.0043434	0.0036206	-0.0022759	0.0058522	-0.0045985	-0.0018807
Aspni5_195099	0.0073576	-0.0044895	-0.0065643	0.00069461	-0.0068003	-0.025543	-0.0082565	0.0058742	0.0083797	0.0066308
Aspni5_194837	0.001329	-0.0051309	0.0010574	0.00062823	-0.0043867	-0.0025614	-0.0038864	0.00044332	-0.0026743	-0.0002388
Aspni5_194652	0.0015227	-0.0040478	0.00017444	0.002107	-0.00043546	0.002403	0.0023312	0.00099062	-0.0013056	0.0039628
Aspni5_194639	-0.0010074	0.005933	0.0067198	0.0034776	0.0052314	-0.0022738	0.0020739	0.0036557	0.0075338	0.0061458
Aspni5_194594	0.0056722	-0.0012475	0.012	-0.017066	-0.015547	-0.0065096	0.017057	0.00088293	0.0053169	0.014235
Aspni5_194381	0.00027185	-0.0091991	0.003225	-0.018077	-0.01425	-0.011412	0.020619	-0.0072225	0.016132	0.033488
Aspni5_194346	-0.0033777	-0.012731	0.0096418	-0.0054543	-0.013524	-0.0044226	0.01462	-0.0068115	0.0015103	-0.0054733
Aspni5_194286	0.0060707	-0.0012961	0.0037956	-0.00135	-0.010207	-0.0079264	-0.0013239	0.0032336	0.0030503	0.0021161
Aspni5_194247	0.0087206	0.00069927	-0.011938	0.011843	0.013474	-0.021222	-0.014436	-0.019221	0.013655	-0.0024816
Aspni5_194096	0.0038525	-0.0031181	-0.00050848	-0.0070104	-0.012594	-0.0098459	0.01254	0.01624	0.005742	0.0057399
Aspni5_193869	-0.009997	-0.017038	0.015311	0.020605	-0.015957	-0.016514	0.011913	0.05248	0.00016289	0.012108
Aspni5_193686	0.021031	-0.0014859	0.012692	0.011798	0.0027017	-0.010923	-0.00086157	-0.00020706	0.0034585	0.015379
Aspni5_193197	0.0077745	0.006154	0.0060284	0.0039233	-0.003877	-0.0029097	0.0022057	0.00014421	0.010383	-0.0034421
Aspni5_193012	0.00035867	0.0009238	0.0051465	-0.0060461	-0.0042569	0.0026417	-0.005454	0.001376	-0.010889	-0.0017175
Aspni5_192967	0.0072444	-0.0024854	0.0022105	0.011337	0.0042672	-0.0014552	-0.0062418	-0.011685	0.002825	-0.0041507
Aspni5_192726	0.00041713	-0.0057345	-0.0010118	-0.0050843	0.00023475	-0.0041873	-0.0098749	-0.0015539	-0.0029628	0.00030654
Aspni5_192510	0.0086657	0.0051264	0.0016786	-0.016007	-0.0070466	0.0057782	0.0024697	-0.0099915	-0.0078179	0.0066735
Aspni5_192036	0.0056099	0.0005164	0.010823	-0.0026304	0.0055005	-0.0012866	0.0012125	0.0010327	0.0034893	-0.0021188
Aspni5_192033	0.001267	-0.0015263	0.0087832	0.0047294	-0.0010192	-0.00088003	-0.0043009	0.00045293	0.0088127	-0.0040934
Aspni5_191898	0.010537	0.0051622	0.011798	-0.013565	0.011066	0.022416	0.0099703	0.0051856	0.0059222	-0.012003
Aspni5_191865	-0.010189	0.008438	-0.011702	-0.024581	0.008638	0.02655	-0.0011499	-0.031697	0.0036357	0.0012983
Aspni5_191749	0.0039629	0.0019929	0.0016496	-0.00039996	-0.0029696	0.0030423	-0.0027773	0.0078146	-0.0058134	-0.0054168
Aspni5_191702	0.006978	0.0022799	-0.0021177	0.0071391	0.0081186	-0.0025651	0.0010372	0.0093337	0.0042841	-0.0072317
Aspni5_191468	0.0078443	0.017355	-0.0023696	-0.011016	-0.0016094	-0.0059619	0.0043151	0.0021168	-0.00352	0.0013577
Aspni5_191424	0.0095253	-0.010113	0.003501	-0.011745	0.011414	0.010815	0.0043945	0.0083274	-0.022161	-0.02547
Aspni5_191165	0.0047241	-0.0047481	0.00077667	-0.00368	0.0035519	0.01447	-0.0044524	0.0096544	0.00021632	0.016983
Aspni5_191100	0.0076387	-0.016913	0.021735	-0.0055986	0.0013682	0.021084	5.4173e-05	-0.01518	0.010021	-0.01236
Aspni5_191006	0.0096346	0.0032974	0.0047913	-0.0024771	0.0043096	-0.0067207	-0.00087362	0.0029409	0.0044032	-0.0031001
Aspni5_190593	0.021536	-0.0054985	0.0057225	-0.0089352	0.0069207	-0.0047575	-0.01037	0.012222	0.002923	0.022557
Aspni5_190592	-0.0071223	0.010252	-0.0021245	0.001286	0.0090968	-0.018785	-0.0027042	0.024285	-0.0050506	0.0055345
Aspni5_190398	0.0087415	0.00032747	0.0016402	0.0054899	0.011571	-0.0048143	-0.0033376	-0.0025802	0.0037178	-0.0036153
Aspni5_190132	0.0053586	-0.012967	0.010026	0.021778	-0.0093583	-0.0075804	0.00045511	-0.020052	0.038712	0.022785
Aspni5_190128	0.0062362	-0.0063998	-0.0024054	-0.0030363	0.010377	0.01619	0.0044388	0.0065514	-0.0035713	-0.0029494
Aspni5_190051	0.0055934	0.0048153	0.0040018	3.0946e-05	0.0014902	-0.0035575	-0.0019149	0.0030907	-0.0012673	-0.0020831
Aspni5_189925	-0.018556	-0.013202	-0.0020285	-0.0028453	-0.010652	0.0048724	0.018198	0.00085814	0.015198	-0.00078444
Aspni5_189853	0.013597	-0.008683	-0.00092862	0.010429	0.013303	0.0029966	0.0032404	0.018087	0.0074367	0.0024042
Aspni5_189693	0.0050691	0.0033404	0.0058728	-0.00064699	-0.0024505	-0.003246	-0.0076207	0.0031981	0.0021161	-0.0021939
Aspni5_189677	0.0032576	-0.0043388	-0.0055349	-0.0038448	0.014178	0.011746	-0.0016674	0.010228	-0.0012506	-0.003357
Aspni5_189272	-0.0042974	0.0032748	-0.007196	-0.0035442	0.0097369	0.0076833	0.012578	-0.0024589	0.013899	0.0038069
Aspni5_189221	0.016711	-0.0047798	-0.003374	0.0034176	0.0028244	-0.0018564	0.013128	0.0053126	0.0066494	0.0072798
Aspni5_188904	0.0013273	-0.0067161	0.0048385	0.001517	-0.0036987	-0.0032552	-0.005226	-0.0012115	-0.0039475	-0.0027464
Aspni5_188817	-0.0026959	-0.0027867	0.01675	0.00063767	-0.0027415	-0.0034452	-0.0058096	0.00039064	-0.0034303	0.0023902
Aspni5_188804	-0.0013947	0.00055502	0.0044292	-0.0080741	-0.0036251	0.010173	0.00037941	-0.011002	0.0082288	0.0062355
Aspni5_188511	0.0027976	-0.0018576	0.0051609	0.0018544	0.0018745	0.0056389	-0.010158	0.0052441	0.00076181	0.00031938
Aspni5_188343	0.0037063	0.00064151	0.0042915	0.0038891	-0.00037274	-0.0043996	-0.004037	0.0001644	0.0018805	0.0014731
Aspni5_188319	0.0028569	0.00017533	0.0022932	-0.0021826	-0.0024106	-0.0015516	-0.0058245	-0.0028739	-0.0029983	-0.0028498
Aspni5_188310	-0.0066442	-0.00093976	-0.00015888	-0.011596	0.014401	0.014359	0.012469	-0.0060054	0.01034	0.013083
Aspni5_188253	0.00097795	-0.00043793	0.00048706	-0.00091119	-0.00025194	0.00097003	0.00040259	0.0015517	0.002814	0.0033776
Aspni5_188103	0.0051178	0.00059518	0.0019316	-0.0048686	0.0027807	-0.00066201	-0.0092466	0.0018899	0.0021493	-0.0010499
Aspni5_188089	-0.00039149	0.0062171	0.015017	0.0001267	-0.0022078	-0.0015558	-0.0014101	-0.0036325	0.0020256	0.0017954
Aspni5_188037	-0.0011853	-0.0034943	0.0076415	0.0049213	-0.004616	-0.0045809	-0.0025746	-0.0016057	0.001092	0.0044486
Aspni5_187898	0.0038055	0.0032838	0.0046632	-0.0016569	0.00021134	-0.0017606	-0.0036998	-0.0012211	0.000586	0.0015083
Aspni5_187818	-0.00048452	-0.0076418	0.0046866	0.0025958	0.0093921	-0.004255	-0.0078177	-0.0015249	-0.0029423	-0.005408
Aspni5_187743	0.0046409	0.003768	0.0039668	0.0015354	0.0020605	-0.0048831	-0.00015374	0.00041436	0.00232	0.0012685
Aspni5_187422	0.013412	0.011027	-0.0059235	-0.01054	0.0095421	-0.0033686	-0.0048211	-0.0054689	-0.010784	-0.010649
Aspni5_187359	0.00017155	-0.0049313	0.0038165	0.0020303	-0.001019	-0.002136	-0.0028349	-0.0031328	-0.00069383	0.00042134
Aspni5_187334	-0.0059918	-0.005967	0.0056028	0.00022278	0.0012618	0.0018757	-0.0024261	-0.0013615	0.00016009	-0.00042781
Aspni5_187099	0.016532	-0.012688	0.0025073	0.0065777	0.0049268	0.010961	0.011308	-0.016939	0.003685	0.016508
Aspni5_186883	-0.015989	-0.0165	0.007956	0.010539	-0.010872	7.5868e-05	-0.0053797	-0.017795	-0.0030826	-0.0053515
Aspni5_186516	0.015565	-0.016525	0.007208	-0.0010263	0.0036238	0.013205	0.0020638	-0.010439	0.015089	0.023183
Aspni5_186504	-0.0019	0.019829	0.013356	-0.023264	0.016451	-0.012959	-0.0059374	-0.002328	0.0079187	-0.010383
Aspni5_186374	-0.0093837	-0.020527	-0.004191	0.011644	-0.0040542	0.012836	-0.015553	0.00090143	-0.0046413	0.0074034
Aspni5_186323	-0.0044693	0.0016617	0.0070287	-0.0026323	-0.0020049	-0.0089402	-0.0081022	-0.0017582	0.0061218	0.0099985
Aspni5_186317	0.0042687	0.0099188	0.018211	-0.0044714	-0.0033363	-0.0034607	-0.0050199	-0.0038471	0.0013069	0.00065882
Aspni5_186194	0.0046421	0.00098807	0.0010115	-0.002219	-0.00050052	-0.0026431	-0.0072795	0.0021173	0.0012215	-0.0025556
Aspni5_186119	0.0066197	-0.00060722	0.0011591	-0.0045302	-0.0020594	0.0023151	0.0075393	0.00063039	0.008183	-0.00055084
Aspni5_186114	-0.0071647	-0.0042883	0.0061049	0.007559	-0.01492	0.0042331	-0.010636	0.020929	0.019089	-0.0041223
Aspni5_185979	-0.0035652	-0.0035128	0.0018818	-0.0092934	0.00099201	-0.0037708	-0.0079011	0.0056143	-0.0055383	-0.003357
Aspni5_185801	-0.0036646	0.0037733	-0.0026771	-0.015673	0.0018465	-0.033541	0.010245	-0.013577	0.0094916	0.00175
Aspni5_185776	0.0062823	-0.0026141	8.5147e-05	-0.0022832	-0.0050879	-0.0020877	-0.0066806	-0.00050191	-0.0068491	-0.0060028
Aspni5_185766	0.0023425	0.0013461	0.0084319	9.6981e-05	-0.0029164	-0.0019982	-0.00712	-0.00060098	-0.00067221	-0.0031431
Aspni5_185699	0.0069125	-0.0082011	0.010649	-0.0011635	0.0018526	-0.0061354	-0.0028322	0.00024283	-0.0098684	0.0068635
Aspni5_185283	0.0013417	-0.0017658	0.0011126	0.00039476	0.0018261	-0.0032772	-0.0073315	0.004371	-7.7077e-05	0.00053338
Aspni5_185219	0.011549	0.00022281	-0.00065162	-0.0075151	0.001123	0.00064752	-0.0084486	-0.0023736	-0.0063078	-0.0045832
Aspni5_184339	0.0088666	0.0038575	0.0097481	-0.0073895	0.0087097	0.010913	0.0056294	-0.0041479	-0.0060849	0.0016066
Aspni5_184330	-0.0019196	-0.0025748	0.0028648	0.00044224	-0.002047	0.0051233	-0.0014512	-0.0075411	-0.0035591	0.0043828
Aspni5_184254	0.0042271	-0.0042103	0.0013255	-0.0026066	-0.00096928	-0.0021087	-0.0033982	0.0059944	0.003506	-0.00039753
Aspni5_184208	0.010274	0.0076109	-0.025218	0.011548	-0.0040787	-0.0030337	0.001981	-0.025811	-0.016281	0.0048892
Aspni5_184174	-0.00069082	-0.007254	-0.005397	-0.00068059	0.0054114	-0.0054268	0.0084726	-0.0012533	0.0098119	0.032107
Aspni5_184149	-0.00013251	0.0006087	0.00062192	-0.0006212	-0.00073932	0.00078516	-4.4541e-07	0.00019647	0.00084426	-0.00024509
Aspni5_184098	0.011051	-0.0097461	0.0041594	-0.0060467	0.0083592	0.024291	0.010685	0.02235	-0.0035996	-0.0043757
Aspni5_184074	0.0056928	-0.00065167	0.0081074	0.013104	0.0014441	0.00053566	0.0036508	-0.0058844	0.013549	-0.0038788
Aspni5_183754	0.01265	-0.007638	0.00088837	-0.0028084	-0.0031986	-0.0054419	-0.011829	0.018956	-0.010855	-0.0096476
Aspni5_183713	0.0016979	0.0068509	-0.0029432	-0.011105	-0.0089672	-0.026304	-0.01907	0.0063409	-0.0080599	0.0012702
Aspni5_183608	0.00096603	-0.0022866	-0.0012548	0.005434	0.0025254	-0.0012147	0.0019555	-0.0037968	0.0025755	0.0055748
Aspni5_183566	-0.002334	0.014883	0.0078294	0.0052937	0.0057257	-0.0045704	0.0030787	-0.007934	0.0054335	0.0085724
Aspni5_183513	0.0053829	0.00016239	0.00055739	0.00090732	-0.0018148	-0.0017956	0.0021618	0.0053093	-1.8005e-05	-0.011685
Aspni5_183395	-0.011844	-0.001091	0.012234	0.0035335	-0.0023104	0.0017903	-0.0060682	0.00087999	0.013792	-0.012967
Aspni5_183329	0.0047471	-0.0041003	0.0070135	0.00083214	-0.0034316	-0.0016225	-0.0037517	-0.003206	0.0018697	-0.0037697
Aspni5_183284	-0.0023537	0.013993	-0.012609	-0.02695	-0.0029351	0.013902	-0.011595	-0.0045211	-0.016226	-0.0022686
Aspni5_183195	0.0021063	-0.006598	0.0092711	0.0042392	-0.01684	0.011073	-0.02111	-0.0086218	-0.0096802	0.010624
Aspni5_183073	-0.018343	0.0028701	-0.013659	-0.016178	-0.0091614	-0.0035227	0.011682	0.024967	-0.0088732	0.0038919
Aspni5_182943	0.01436	0.0012528	-0.0066437	0.0019183	-0.00023781	-0.00373	-0.0022836	-0.0047955	0.0032811	-0.0086538
Aspni5_182754	0.0034399	-0.00023899	-0.0064522	0.0045286	0.0063087	-0.0087081	-0.0091799	0.0022804	0.0049409	0.0014356
Aspni5_182514	0.0087626	-0.0029261	-0.0054952	0.0014763	0.0029131	-0.0039092	-0.0051613	0.0043892	-0.0032953	-0.012013
Aspni5_182499	0.012447	0.0011683	-0.0058063	0.0066119	0.012758	0.00016602	-0.0061734	-0.010197	-0.0038487	0.00089413
Aspni5_182489	-0.00651	-0.040393	-0.0080751	-0.0021524	-0.0051393	-0.019233	-0.021265	-0.012917	-0.030968	-0.0044281
Aspni5_182341	0.0047251	0.0016231	0.0031489	0.0023406	-0.0044441	-0.00028499	-0.007976	0.0043855	0.0070777	-0.0051413
Aspni5_182255	0.0013735	-0.00024684	-0.0017176	-0.0013	0.0079174	0.00047672	0.0057517	0.0045803	0.0076406	-0.0044513
Aspni5_182097	-0.0013582	0.00067301	0.0066156	0.0092691	-0.0047554	-0.0065652	0.00053365	-0.0024005	0.0034743	-0.0032546
Aspni5_182031	-0.0028995	-0.0060004	0.012177	-0.0062885	0.0065023	-0.0017814	0.0021977	0.009801	0.016494	-0.0032785
Aspni5_181999	0.0034264	-0.018838	-0.0022608	0.01479	0.0027011	-0.010128	-0.017832	0.0058432	0.004907	-0.0021388
Aspni5_181931	0.0063101	0.0056803	0.0019082	0.00071965	-0.0018858	-0.0027667	0.0051446	0.00040992	0.0060767	0.0015948
Aspni5_181915	0.0067171	0.00047053	0.0090217	0.0027527	-0.0031433	-0.0026797	-0.0087198	0.0074324	-0.0013798	-0.0064101
Aspni5_181473	0.027693	-0.012542	-0.02044	-0.0053588	-0.014255	0.017869	0.022872	-0.0044506	2.8228e-05	0.0045708
Aspni5_181398	0.018245	0.012706	-0.0095537	0.0090223	-0.0032082	0.0047974	0.00022124	-0.0036594	-9.5973e-05	0.011749
Aspni5_181397	-0.0073446	0.019464	0.0063762	-0.0049902	0.006908	0.013047	0.011069	-0.0047571	0.0051534	0.010944
Aspni5_181216	0.0038935	0.00090181	0.0027424	-0.0072108	0.001306	-0.0020816	-0.004848	0.0083984	0.0043247	-0.0044543
Aspni5_181152	0.0024761	0.0032885	0.0024379	0.00021141	-0.0087049	0.0018787	0.0030208	0.0032517	0.0050058	-0.0048181
Aspni5_181057	-0.0028513	-0.0078755	0.0099396	-0.0080481	-0.011769	-0.0085502	0.0024037	-0.0076112	-0.0027088	-0.0069116
Aspni5_180862	0.0035991	-0.0051859	0.0018885	-0.011658	-0.020507	-0.0079506	0.0043229	0.00085687	0.0036911	-0.008695
Aspni5_180773	0.0037849	0.0053825	0.0074324	0.0012474	-0.0020937	0.0019872	-0.0021892	-0.00035668	-0.00062371	-0.0026735
Aspni5_180245	0.015499	0.0028723	0.0052967	0.0036599	0.0051098	-0.0043298	-0.00074901	0.0028872	0.010438	-0.005448
Aspni5_179989	-0.0053395	0.014325	-0.0038104	-0.012453	0.0063792	0.025382	0.011266	-0.020539	0.0063896	0.00069735
Aspni5_179925	0.0010779	0.00096658	-0.0024042	-0.0038944	-0.0013063	0.0023384	0.0033024	-0.0015906	-0.004327	0.0028805
Aspni5_179682	0.0078098	0.019403	0.00602	-0.0044589	0.00066333	0.00184	-0.0050063	-7.6218e-05	-0.0044297	0.0013774
Aspni5_179495	0.02142	-0.00045353	0.0071141	-0.0079724	0.019059	0.017173	-0.009465	0.00027097	0.016418	-0.016474
Aspni5_179483	0.0020619	-0.00099003	0.00042806	0.0013141	0.0051387	-0.0095676	0.0036104	0.0051698	-0.0014117	0.0087649
Aspni5_179436	0.0027474	0.00059146	0.010531	0.0021379	-0.0078369	-0.0042744	-0.0047594	-0.0019779	0.0034897	0.0016699
Aspni5_179427	-0.0075736	-0.0047061	-0.01315	-0.00016357	-0.014599	0.012487	-0.011748	0.001453	0.017377	-0.012779
Aspni5_179409	0.003068	-0.0050718	-0.0155	-0.0031593	0.002898	0.028558	-0.023689	0.0028443	0.017203	-0.0041312
Aspni5_179246	0.012862	0.0085965	0.01052	0.0053002	0.021498	-0.0059049	-0.011271	-0.0066848	-0.010508	0.012278
Aspni5_179215	-0.014741	-0.015647	0.027477	-0.032208	-0.018933	-0.033021	0.00078407	0.03056	-0.030493	0.0011043
Aspni5_179208	0.0010492	0.00084826	0.0082687	-0.0036826	-0.0046197	0.0025167	-0.0027241	-0.0031064	-0.0077069	-0.0003387
Aspni5_179172	-0.00084249	-0.008066	-0.0037052	-0.00068314	0.004772	0.006506	-0.0038566	0.010516	0.0028069	0.0024734
Aspni5_179142	0.0041654	-0.0037324	-0.0012128	0.0039458	0.001889	0.0060621	0.0034288	-0.0036125	0.00012686	-0.00044931
Aspni5_179063	0.0045914	0.00033789	0.0028266	0.00039255	-0.00074164	-0.0039786	-0.0080541	0.0020465	0.0013695	-0.0012892
Aspni5_178989	0.017205	0.03796	-0.011978	-0.01611	0.0014885	-0.0047449	0.0051959	0.0019336	0.012893	-0.0062673
Aspni5_178964	0.0056658	-0.0034881	-0.0032387	-0.0038681	-0.0077075	-0.01405	0.0070558	-0.0040746	0.006713	-6.755e-05
Aspni5_178934	0.0039416	-0.034215	0.01378	-0.038211	-0.021692	-0.034676	0.011557	0.020764	-0.0080836	0.0022217
Aspni5_178912	0.0036471	-0.0011242	-0.0019127	-3.4145e-05	-0.002064	0.0021628	-0.0045666	-0.0045653	0.0027445	-0.0027545
Aspni5_178379	-0.010385	0.00077507	0.013145	0.0058464	0.0064074	-0.0033632	0.0080936	0.0052733	0.0041172	0.0075431
Aspni5_178270	-5.7783e-05	-0.00038156	0.0014905	-0.00015822	0.0028091	0.00074936	-0.0013624	0.0063487	-0.004475	0.0074769
Aspni5_178210	0.0074073	-0.00077924	0.0056633	-0.0015025	-0.0014028	-0.0019896	-0.0060927	-0.0010067	0.00041645	-0.0014105
Aspni5_178085	-0.0021868	-0.0035996	0.0060327	-0.0079922	-0.012554	0.0040135	0.0049261	0.016097	-0.013322	0.019799
Aspni5_178043	0.017361	-0.002693	-0.010437	-0.0072144	-0.018877	0.0013736	0.012631	-0.010418	-0.0090939	0.0080134
Aspni5_177970	-0.0011106	-0.0074932	0.0026151	-0.0059121	-0.0010478	0.0018469	-0.0082992	0.00099205	-0.007646	0.00062471
Aspni5_177559	-0.013166	-0.0018861	0.027858	-0.011726	-0.0083115	-0.0095225	-0.024159	0.00090692	0.0055103	0.011281
Aspni5_177466	0.0085949	-0.0052184	0.0089036	-0.0067008	0.0058802	-0.016107	0.0082825	0.0083325	-0.0029329	0.020358
Aspni5_177045	0.010083	-0.0038294	0.012115	-0.0032359	0.0031142	0.0096085	0.0043679	-0.00080578	-0.0068668	0.013428
Aspni5_176918	-0.00196	-0.0090118	0.0022689	0.0031768	-0.0034659	0.00059771	-0.0057691	0.0023807	-0.00013791	-0.007905
Aspni5_176222	0.010965	0.0079016	0.0053336	0.018542	-0.010581	0.016737	-0.018444	0.018104	-0.015418	0.009106
Aspni5_176096	0.0056581	0.00031583	0.0080183	-0.0044645	-0.0045814	0.0034358	-0.0018002	-0.0028621	0.00049835	0.0018688
Aspni5_175712	0.0076335	-0.0023044	0.0023967	-0.0043744	-0.0041505	-0.0099808	0.0022863	0.0070674	0.00791	-0.0029637
Aspni5_175389	0.0026516	-0.00075778	0.0050227	0.0013322	-0.0016099	-0.0027355	-0.0068566	0.0003634	-0.001973	-0.00015411
Aspni5_174930	0.0037048	8.2033e-05	0.011841	-0.0026753	-0.0097196	0.00026397	0.00191	-0.0070654	-0.00016085	-0.00186
Aspni5_174816	0.0092951	-0.0078822	0.0023578	-0.0036686	-0.0067496	-0.010864	0.003942	-0.0010061	-0.0037795	-0.0075538
Aspni5_174574	0.0083931	0.0010427	0.018724	-0.006407	0.012136	0.0040491	0.0056326	0.0080749	-0.0013146	-0.00093803
Aspni5_174067	0.0032333	0.0015506	0.0057274	0.00010607	-0.0022323	0.0015942	-0.0032736	0.0019834	-0.00027558	-0.00099105
Aspni5_174018	0.00092751	-0.0031118	0.0023328	-0.0025149	-0.0036855	-0.0067028	-0.0057898	-0.0015492	-0.0053197	-0.0020784
Aspni5_173968	0.001375	0.00075421	0.0023607	-0.00037583	-6.782e-05	-6.3335e-05	-0.011834	0.0039651	-0.00742	0.0044923
Aspni5_173921	-0.00040082	-0.004556	-0.0039697	-0.0046131	0.0031091	-0.0072183	-0.0087394	-0.0022871	0.0034199	0.0081545
Aspni5_173527	0.023832	0.0018099	-0.02792	0.017555	-0.027471	0.019047	0.0049013	-0.0037732	0.013259	-0.002595
Aspni5_173451	0.021946	-0.0026326	-0.017918	-0.0071641	-0.011755	0.01779	0.013246	-0.021953	-0.0011444	0.0087056
Aspni5_173310	0.00059735	-0.0026305	0.0044596	-0.0059332	-0.0026018	-4.4273e-05	-0.0030438	-0.0038464	-0.0074439	-0.0005016
Aspni5_173096	0.0071821	0.0013206	0.0012885	-0.0073288	-0.0054663	0.012928	0.0040546	0.0011227	0.0013567	0.0020548
Aspni5_173093	0.013156	0.017296	-0.0048991	-0.0022763	-0.012164	-0.014733	-0.0026146	0.0023158	0.0070942	0.00085958
Aspni5_172773	-0.0015966	-0.006587	0.011574	-0.0037571	-0.005244	0.0026186	-0.003161	-0.0082135	-0.0073464	-0.00080964
Aspni5_172579	0.011702	0.024779	0.0099851	-0.011144	-0.0098987	0.0051386	-0.0034125	0.0027485	-0.0053786	0.0011185
Aspni5_172534	0.0036837	-0.0030082	0.0019263	-0.001947	0.00117	-0.00050867	-0.009461	-0.0059789	-0.0037833	0.00077943
Aspni5_171978	-0.0024452	0.0010901	0.0031253	-0.0011372	0.003407	0.00158	-0.0062199	0.0023286	0.0024857	0.0046074
Aspni5_171426	0.0043052	0.00042429	0.012737	-0.0022734	-0.014445	-0.0056853	-0.023997	-0.0028381	-0.016602	0.0038146
Aspni5_171344	0.0028173	-0.0056992	-0.0059109	-0.0011486	0.00074236	-0.0016119	-0.0015415	0.0010766	-0.0054479	0.00011729
Aspni5_171334	-0.0093878	-0.00025941	-0.0089248	-0.015579	0.013703	0.011115	-0.0011936	-0.011414	0.00036181	0.01355
Aspni5_171303	0.0041223	-0.0036085	-0.0019323	0.0016345	0.0030168	-0.0027024	-0.0029281	0.0035578	-0.0011195	9.0375e-05
Aspni5_171186	-0.010801	0.00067473	-0.0060838	0.00092543	-0.0045292	-0.018077	-0.012846	-0.0028338	0.0053111	0.0034373
Aspni5_171163	0.016604	-0.01754	-0.018913	0.0023684	-0.0047037	-0.0065134	-0.0040535	-0.00089623	-0.0088823	0.012637
Aspni5_170954	-0.004474	-0.0088073	0.0081886	-0.023283	0.011401	-0.0046459	-0.0022813	0.0012546	0.0014738	0.0036452
Aspni5_170950	0.0078413	-0.0048522	0.0032594	-0.0030097	-0.015401	-0.0043793	-0.0023405	0.010264	0.0032203	0.0063384
Aspni5_170788	0.020623	-0.010956	-0.01201	0.013056	-0.0007715	0.0021372	-0.011292	-0.020568	0.0080948	-0.0086441
Aspni5_170777	0.0030318	0.016004	0.0054497	-0.0063273	-0.00738	0.0069339	-0.0099118	0.0067677	-0.0069954	0.0086546
Aspni5_170649	-0.0073418	0.0050143	-0.00077615	-0.025588	0.0051217	0.01251	0.0029777	-0.014418	-0.0023619	0.0047653
Aspni5_170612	0.008688	0.00022662	0.010228	-0.005188	-0.011459	-0.0022146	-0.0024257	-0.0062018	-0.0024338	-0.0080141
Aspni5_170177	-0.00020887	-0.018851	-0.037356	-0.0088764	-0.026374	0.014783	-0.020102	0.015364	0.023639	-0.0042491
Aspni5_144265	0.0013277	-0.0030237	0.0015368	0.0028008	0.0056174	-0.0041544	0.00084158	-0.0059926	0.011445	-0.0070375
Aspni5_144168	0.017165	-0.016569	0.0025009	-0.027885	0.013102	0.0063448	0.017694	-0.0053676	-0.048502	-0.049477
Aspni5_144147	0.012512	-0.01214	0.006279	-0.017997	0.0070116	0.010061	0.0064285	0.016291	-0.018091	-0.036709
Aspni5_144129	0.012785	-0.018592	0.0016879	-0.01854	0.010363	0.015772	0.0046233	0.0033433	-0.019978	-0.037525
Aspni5_144115	0.00050445	-0.0014532	0.0010406	0.0016617	-0.00056965	0.0022548	-1.8375e-05	-0.0013768	0.00056683	-0.0021624
Aspni5_143973	-0.0003095	0.00078336	-0.0030853	-0.0035007	0.0077348	-0.0049314	-0.005678	0.0040581	0.0094161	0.0079763
Aspni5_143971	-0.009165	-0.0017667	-0.0087987	0.0021842	0.011729	0.0059247	0.0077465	-0.0054255	0.0031652	0.0083114
Aspni5_143946	-0.01562	0.0014443	-0.0095725	-0.010372	0.0060052	0.0034694	0.0025262	-0.0011496	-8.4203e-05	0.0030467
Aspni5_143825	-0.023769	-0.005901	0.0091327	0.016263	-0.0084822	-0.0062124	-0.019048	0.01336	-0.0048364	0.0016695
Aspni5_143807	3.5389e-05	-0.0013893	0.0033421	0.0021716	-0.0037724	-5.2017e-05	-0.0069895	-0.00043569	-0.0057663	0.0010258
Aspni5_143688	0.0099242	-0.014231	0.002675	-0.022895	0.017914	0.010097	0.0018423	0.0094003	-0.028347	-0.032374
Aspni5_143500	0.00023159	0.00041264	0.0014529	-0.0031396	-0.0018583	-0.0061201	-0.0051484	0.0016345	-0.002873	0.0025698
Aspni5_143465	0.01932	-0.0049288	0.0096949	-0.0078053	-0.0096836	-0.0014789	-0.0029934	-0.01514	0.004739	-0.012996
Aspni5_143462	0.0053722	0.0024196	0.0017473	-0.01095	-0.0035834	-0.0090146	0.016821	0.022519	0.015802	0.0093375
Aspni5_143436	0.0085301	0.01139	0.0045179	-0.017667	-4.2353e-05	0.028747	-0.005141	0.011368	0.010829	-0.012471
Aspni5_143382	0.0095186	0.0014846	-0.00061792	-0.0071982	0.0037637	-0.0063184	-0.0045863	0.009463	0.0021014	-0.0043119
Aspni5_143287	-0.00089718	0.0016736	-0.0015543	0.0027227	-0.0060013	-0.0067489	0.00074875	0.0066786	0.010011	0.003863
Aspni5_143091	0.0077666	-0.0030977	0.00096014	0.0015911	-0.0049902	-0.0067903	-0.0087466	-0.0022905	-0.0028416	-0.0047487
Aspni5_143038	0.0032353	-0.00078929	-1.9885e-05	-0.00085834	-0.017609	-0.0088574	0.014188	-0.0085411	0.0058023	-0.0087929
Aspni5_143018	-0.0059741	-0.0031602	0.0056593	-0.0026748	-0.011864	0.0035359	-0.010056	0.0090578	-0.011689	0.0023236
Aspni5_142713	0.0076208	-0.011393	-0.0014999	-0.0043154	-0.0023393	-0.0029226	-0.0045302	0.0082313	-0.013602	-0.009189
Aspni5_142500	-0.022276	0.00097038	-0.014759	-0.012782	-0.0035355	0.020782	0.0086516	0.030983	-0.0027269	-0.0045788
Aspni5_142342	0.0038915	0.0081274	0.0036023	-0.012449	-0.011576	-0.0051168	0.0028796	-0.00065696	-0.004104	-0.0091287
Aspni5_142179	0.00054496	-0.0030047	-0.0028657	-0.0078664	-0.0017983	-0.0004995	-0.010267	0.0020812	0.0057612	0.0038253
Aspni5_142020	-0.00030619	0.0018645	0.00098463	-0.0069126	0.025292	0.016963	-0.010007	0.0072333	0.013693	0.010516
Aspni5_141890	-0.00058863	-0.024719	0.0023524	-0.016906	-0.017841	-0.016189	0.013405	-0.0029262	-0.013725	0.003317
Aspni5_141246	-0.0041047	0.0021196	0.0067904	-0.0086878	-0.007602	-0.014941	0.0053586	-0.00026056	0.0026916	0.0016373
Aspni5_140924	-0.011023	-0.006722	0.0027472	0.016747	0.0059953	0.011359	-0.012379	0.0014929	0.0026809	0.012128
Aspni5_140911	0.0087391	-0.0033907	-0.0024469	-6.2279e-05	0.0007798	0.0010468	-0.0034437	0.008139	0.00022844	-0.0019614
Aspni5_140908	0.00094637	-0.00091676	-0.016026	-0.0035754	-0.011053	-0.0084836	-0.018974	-0.024242	-0.0039259	-0.00052712
Aspni5_140637	0.0031384	-0.0045906	0.0016855	0.00099249	-0.0033308	-0.0069084	0.00012407	0.0045512	-0.012611	0.0031798
Aspni5_140511	0.0048467	0.0095946	-0.017085	-0.0073272	-0.0090497	0.0093819	-0.0049251	0.0044662	0.0076445	-0.013742
Aspni5_140386	0.019088	0.0029908	0.00824	0.00016467	0.0078719	0.00026946	-0.0014889	0.0099658	0.0047168	0.0062236
Aspni5_140344	-0.0014969	0.0067148	-0.00042906	-0.0023716	0.0028212	-0.00017268	-0.0010446	-0.00053739	-0.002022	0.0025349
Aspni5_139591	-0.0010999	-0.0019252	-0.0012525	-0.00020655	0.0023454	-0.00056047	0.00023051	-0.0053472	-0.0020649	-0.0034548
Aspni5_139400	0.013658	0.0014861	-0.011624	-0.0075986	0.0048063	-0.0044201	-0.0038164	0.012508	0.0078557	-0.011413
Aspni5_138585	-0.00040903	0.00090008	-0.00069851	0.0013538	0.0013039	-0.0017449	-0.0012677	0.0026976	-0.0037603	0.00074154
Aspni5_138531	0.011326	-0.014333	0.002268	-0.021645	0.015402	0.010557	0.0053572	0.0074151	-0.026928	-0.029806
Aspni5_138440	0.01496	-0.019361	-0.0065928	-0.043203	0.031184	0.0089268	0.00041036	0.0041118	-0.024359	-0.040931
Aspni5_138318	-1.664e-05	-0.0033464	-0.0015344	-0.0091219	0.0034052	0.0013532	-0.0059891	-0.002045	0.0011318	-0.0031673
Aspni5_138298	0.0090622	-0.017458	0.0030212	-0.012142	-0.022778	0.00095538	0.0057239	-0.013821	0.017336	0.0068351
Aspni5_138265	-0.0061564	-0.0004587	-0.00077635	-0.0022382	-0.0022409	-0.0044244	0.0070303	0.016542	0.0022362	0.0077651
Aspni5_138231	-0.0023051	-0.0038578	0.00014034	-0.0026162	0.00081791	-0.0019069	-0.0056772	0.0021235	-0.0028762	0.0017283
Aspni5_138151	0.0020574	0.0027945	0.0045645	0.00050635	-0.02074	-0.0038388	0.0083767	-0.014134	0.0064353	0.024267
Aspni5_137960	-0.006213	-0.0010467	0.0093504	-0.0032483	-0.0094571	-0.00040308	-0.023938	-0.011379	0.0088713	0.004477
Aspni5_137850	0.00060316	0.0014244	0.0029406	0.00072309	-0.0029337	-0.0023294	-0.0092558	-0.0023927	0.0023268	0.0012779
Aspni5_137436	0.020851	-0.018041	0.0093771	0.0056966	-0.0064123	0.019192	0.012335	0.00073879	-0.0061268	0.012926
Aspni5_137356	0.00048086	0.00020505	-2.3114e-05	0.00080445	0.00018315	-0.0021841	-0.0013692	-0.00067311	0.00034265	9.7566e-05
Aspni5_137153	-0.00095092	-0.0098302	-0.0015099	-0.0059134	0.0019878	-0.0088407	0.011096	-0.00047995	0.0092662	0.0014536
Aspni5_137079	0.01014	0.03221	-0.0091628	-0.028994	0.0052795	-0.0063609	0.0098292	0.0020098	0.0067777	0.0088412
Aspni5_136920	0.0035467	-0.011066	0.0054089	-0.0032647	0.0067125	-0.0084816	0.014869	0.0057657	0.03725	-0.010456
Aspni5_136791	0.012953	0.00187	-0.00030868	-0.012284	0.0030076	-0.0045371	-0.0060177	-0.0013811	-0.0031854	-0.0041063
Aspni5_136195	-0.011811	-0.00080042	-0.0137	-0.018554	0.012116	0.010099	0.011938	-0.001375	-0.0099236	0.010597
Aspni5_136125	-0.01569	-0.024289	0.016201	-0.002199	-0.010596	-0.0031513	-0.021961	0.0062918	0.011496	0.012705
Aspni5_136103	0.0044615	-0.00072669	0.0047702	-0.001366	-0.0020159	-0.0034671	-0.0063538	-0.0016124	-0.0012794	-0.0020195
Aspni5_135959	0.0059138	-0.0046457	0.010306	-0.0059543	-0.0011966	0.003872	-0.0068976	0.002243	0.0086514	-0.0036779
Aspni5_135884	0.024378	-0.015874	-0.0012225	-0.0033951	0.010432	-0.016238	-0.0034348	0.0022772	0.023135	-0.023898
Aspni5_135685	0.0076021	0.0036385	0.0061977	-0.0021471	-0.0070072	-0.0019217	-0.0046221	-0.0010285	-0.002494	-0.0044513
Aspni5_135561	0.0041714	-0.00038268	0.0083495	0.0043886	0.0022409	-0.0021688	-0.0081547	0.00056911	0.0054001	-0.0059025
Aspni5_135400	0.0093702	0.0073102	0.010873	-0.0051231	-0.0094175	-0.0028558	-0.0078311	-0.001166	-0.0022732	-0.0082806
Aspni5_134885	-0.011195	0.0089199	0.0040357	-0.0048605	-0.026566	0.024639	-0.025084	-0.0057334	-0.0013684	0.00079444
Aspni5_134447	-0.0027957	0.0007384	0.0022897	-0.0047988	0.0020463	0.00062289	0.0010115	0.0063936	0.0053263	0.00036118
Aspni5_134044	0.0017294	0.0021817	0.0069907	0.0017734	-0.0042198	-0.00072146	-0.009383	0.00028157	-0.00039425	0.00079152
Aspni5_133712	0.004818	0.0023324	0.0005974	-0.015135	-0.0022882	0.0019368	-0.0013274	-0.010731	-0.0044938	-0.0077063
Aspni5_133333	0.013305	0.015189	0.0043961	-0.015049	-0.0029541	0.0076081	-0.0082741	0.0084713	0.00014699	0.0070143
Aspni5_133271	0.0076772	0.0016652	0.0011507	0.0020651	0.0042079	-0.0040133	-0.0047452	-0.00069963	0.0063307	0.0022477
Aspni5_133118	-0.017944	-0.023155	0.026008	0.010395	-0.010719	-0.013276	-0.010517	0.016465	-0.00099447	4.0902e-05
Aspni5_132708	0.0016184	0.0033099	0.0098092	-0.0022535	-0.0022149	-0.00398	-0.0023054	0.00045393	0.00071273	-0.0027943
Aspni5_132422	-0.022956	-0.012866	0.0060287	0.00063999	-0.00047475	0.0072939	-0.0027859	0.0023156	0.01066	-0.003888
Aspni5_132412	-0.005027	0.00565	-0.0013641	0.010175	0.01488	0.020359	-0.0018329	-0.0040361	-0.0010553	0.011907
Aspni5_132396	0.0076018	-0.012433	-0.0082173	0.0046273	0.0039461	0.0023193	-0.0087135	-0.00057122	0.02019	-0.019997
Aspni5_132356	0.00074232	0.00047105	-0.0001173	-0.0004662	0.0010213	0.0017532	-0.0019406	-0.00011761	0.00017237	0.0026812
Aspni5_131499	-0.0011843	-0.001722	-0.0035148	-0.0015937	0.008521	0.004256	-0.0032903	-0.0056538	-0.0049645	-0.00045409
Aspni5_131295	0.0038932	0.0036886	0.0048012	0.0024972	0.0022021	-0.0016195	-0.0032759	-0.00084751	-0.0021933	0.0028223
Aspni5_131232	0.0097667	-0.01172	0.016573	-0.013487	0.011727	-0.0037204	0.010532	0.021377	0.019431	-0.033972
Aspni5_130394	0.011302	0.00076829	-0.0060456	0.0036454	0.018808	0.0012597	-0.0072665	0.0050833	0.010616	-0.0027998
Aspni5_129918	0.019307	0.0016345	-0.0066008	-0.009639	0.020339	0.013706	-0.010785	-0.012274	-9.8116e-05	-0.0034084
Aspni5_129799	0.0070922	0.00093795	0.0091569	0.0031471	0.0045494	0.0012434	-0.0073694	0.00048687	0.0023309	-0.0051765
Aspni5_128747	0.0076655	0.0038494	-0.0032641	0.00043882	-0.0098672	-0.0024832	-0.0012046	0.0099416	0.0087121	0.00013603
Aspni5_128601	-0.0034681	0.0046389	0.0083949	0.014407	-0.0093767	-0.0013732	0.011002	0.0095512	0.015297	0.02083
Aspni5_128571	0.0020819	-0.00043902	0.004432	-0.0023302	0.0065211	-0.0047667	-0.0049177	0.00017211	0.0061767	0.0013615
Aspni5_128537	-0.0046423	-0.0016863	-0.002211	-0.0035632	-0.0031232	-0.0032213	-0.00017006	0.00030067	0.00016179	-0.0024258
Aspni5_128523	-0.00060877	-0.0038122	-0.0003466	-0.0014775	-0.001704	-0.0048194	-0.0084206	-0.0014532	0.00025198	0.0014136
Aspni5_128518	0.010634	-0.0076063	0.021536	0.0018059	-0.0069122	-0.0019034	-0.003352	0.018664	0.006163	0.009841
Aspni5_128516	-0.00018703	-0.0038473	0.008146	-0.00048981	-0.007702	0.0020277	0.0047994	0.0020286	0.003142	-0.0023314
Aspni5_128495	-0.0012387	0.0020649	0.00052727	-0.0025058	0.0067556	-0.0023408	0.0026191	0.004879	0.0024536	0.0060266
Aspni5_128478	0.00087131	0.0062127	0.01966	-0.036511	0.014792	0.028846	0.0049737	-0.013531	-0.0099077	0.014714
Aspni5_128411	-0.00043132	0.0017088	-0.0051459	-0.0066916	0.0014388	-0.0096164	0.0050145	-0.0014754	0.01193	0.016231
Aspni5_128325	0.0098084	0.0041917	0.012347	0.0021517	-0.00042847	-0.0019894	-0.0069022	0.0047587	0.0044847	-0.0068277
Aspni5_128321	0.0037864	-2.6733e-05	0.0069361	-0.0046446	-0.0057964	-0.0032546	-0.0089067	-0.0019319	-0.0017188	-0.00232
Aspni5_128111	-0.0066557	-0.00016605	-0.00047596	-0.014597	0.0025775	-0.004576	0.0026026	0.0091945	0.012915	0.012462
Aspni5_128109	0.0048086	-0.0042805	0.0017163	-0.0022386	-0.0025547	-0.0044343	0.0010191	0.0061295	-0.00090302	-0.0020238
Aspni5_128051	0.0094224	-0.00037127	0.0018267	-0.0070706	0.0024781	-0.0067743	-0.0067054	0.0087078	-0.00019016	-0.0023183
Aspni5_128031	0.0023718	-0.0052482	0.0038599	0.00039099	-0.0038352	-0.005455	-0.0052945	-0.00070833	-0.0048873	-0.00064943
Aspni5_127997	0.0067463	-0.0045803	0.00352	-0.0051236	0.0054734	0.013698	0.013267	0.0079115	-0.0076376	0.0064028
Aspni5_127984	0.0016479	0.0034105	-0.018576	-0.022405	-0.002831	0.018037	0.015655	-0.015743	-0.015092	-0.003985
Aspni5_127983	0.0025355	0.0042006	0.006944	0.0032949	-0.0055319	-0.0026732	-0.011903	-8.8302e-07	-0.0044462	-0.0026197
Aspni5_127919	0.00024004	0.0013134	-0.0014693	0.0016833	0.00015466	-0.0036565	0.0012847	0.0014654	-0.0019477	0.0036162
Aspni5_127805	0.00090473	0.0029384	-0.0034113	-0.00040344	0.00066716	-0.003055	0.0029236	-0.001888	-0.0019811	-0.0013343
Aspni5_127766	0.0060171	-0.0019477	-0.0054134	-0.0098892	-0.019191	-0.004973	-0.0082927	0.0095155	-0.0027738	-0.0084336
Aspni5_127671	-0.0031688	-0.0031408	0.0042402	0.0042753	-0.0014261	-0.00040244	-0.0088359	-0.0046304	0.00038091	0.0023199
Aspni5_127650	0.0066412	-0.0034358	0.0059767	-0.0095068	-0.0024887	0.0075796	-0.010369	0.013852	0.00019907	-0.0049609
Aspni5_127602	-0.0077862	0.0029484	0.0076448	-0.0082313	-0.013061	0.0090718	0.00011898	-0.0034403	0.00017544	-0.00073705
Aspni5_127539	0.0015691	-0.01216	0.01611	-0.0016774	0.007672	0.0084227	-0.0064519	0.002398	-0.0042627	-0.0024024
Aspni5_127477	0.013073	-0.0020444	-0.0013857	0.00055509	0.0003107	0.0013035	-0.0058942	0.0044718	0.0017361	0.00013664
Aspni5_127399	0.005986	-0.00076811	0.0039639	0.003388	-0.0027545	0.00050187	-0.0042422	0.0046285	0.0033091	-0.0051096
Aspni5_127221	0.0021838	0.0040068	0.0096132	-0.0081212	0.0023059	-0.002037	-0.0050342	-0.0018497	0.0052394	-0.0039007
Aspni5_127170	0.0053996	-0.0016455	-0.002074	-0.0096779	0.0080636	0.0017018	0.00099201	0.0067819	-0.0038407	0.0039023
Aspni5_127140	0.0014468	-0.00031368	0.00061665	0.0015886	0.0041958	0.0029413	0.00086302	-0.0028278	0.00043801	-0.0038705
Aspni5_127139	-0.0003868	-0.0055983	0.0078577	-0.012821	-0.0016762	0.015129	-0.0090252	-0.0013916	0.018919	0.036113
Aspni5_127124	-0.0061577	-0.0045449	0.0047897	-0.0022856	-0.0057543	0.0014759	-0.00067813	0.0021381	0.010209	0.00099177
Aspni5_126952	0.0058266	-0.014394	0.0061253	-0.030712	0.00050168	-0.010121	-0.0083966	-0.009225	-0.0042548	0.0098089
Aspni5_126938	0.028708	-0.031065	0.0014619	-0.002801	0.0081746	0.025839	0.004475	0.0050663	-0.016517	0.011357
Aspni5_126811	0.021863	-0.0042012	-0.013121	-0.0099581	0.0028382	0.0002143	0.015781	0.013559	0.0037826	-0.0076828
Aspni5_126639	0.0017714	0.0031963	0.0045338	0.00078668	-0.009433	-0.0087393	-0.00011968	-0.0072638	0.0093075	-0.011181
Aspni5_126606	0.0063301	-0.0084792	0.0056691	0.0050145	0.018883	0.018236	-0.0030539	0.034424	0.0052952	-0.0030248
Aspni5_126565	0.0069308	0.0088144	0.012604	-0.0020423	0.0049029	0.0071323	0.001906	0.00017379	0.0035105	-0.00057168
Aspni5_126523	0.0088151	-0.00070756	-0.0058644	-0.006247	0.0034113	-0.0048629	-0.0080997	0.010165	0.00072592	0.003214
Aspni5_126469	0.00087737	0.0049891	0.0025479	-0.0056285	0.0048448	0.002855	-0.0035471	-0.0045554	0.0041926	-0.0030941
Aspni5_126166	-0.00021262	0.011744	0.018849	-0.037802	-0.0010403	0.031719	0.019887	-0.022003	-0.0032347	-0.0042565
Aspni5_126043	0.0063778	0.00041371	0.0052417	-0.0033656	-0.0022995	-7.5167e-05	-0.0031216	0.0014296	-0.002801	-0.00016193
Aspni5_125995	0.0043364	5.4504e-05	0.0063115	-0.003369	-0.0028338	-0.00027942	-0.0073615	0.00063115	-0.0028735	-0.0018988
Aspni5_125961	0.0041086	-0.014713	0.0055579	-0.0030498	-0.0051102	0.009719	0.0050439	0.0035769	0.016022	-0.0082667
Aspni5_125903	-0.0091351	-0.0032116	0.00052398	-0.018996	0.010403	-0.0031624	-0.0049072	0.016279	0.0021937	0.014777
Aspni5_125895	0.0053182	-0.0080213	0.0052888	-0.0059453	-0.0028542	-0.0041895	0.0039478	-0.00038632	-0.0048661	0.0014988
Aspni5_125885	-0.00050476	0.0061434	-0.0045985	-0.007274	-0.015486	0.028726	-0.013819	-0.01426	0.025583	-0.0032764
Aspni5_125862	-0.0017186	-0.0013564	0.0032363	0.011784	-0.00075196	0.0016572	-0.001705	-0.0041578	0.0089709	0.019112
Aspni5_125836	0.0060611	0.0032999	0.0017954	0.0065714	-0.0044261	-0.00052525	6.8028e-05	-0.0012781	0.009093	0.0042115
Aspni5_125804	0.00074255	-0.0025774	0.0061412	0.0017784	-0.0011845	-0.0061064	-0.0049362	0.0025901	0.00010957	-0.0023686
Aspni5_125801	0.0040559	-0.028692	0.015945	-0.034199	-0.020798	-0.037375	0.02047	0.020636	-0.035824	-0.0061504
Aspni5_125795	0.018934	-0.00017043	-0.0042781	0.00067063	-0.0044808	0.0029937	0.011177	0.0064742	0.0039526	-0.018227
Aspni5_125768	6.3735e-05	-0.0024334	-0.00071508	-0.0021189	0.005373	-0.0038605	-0.00068912	0.00090037	-0.00031838	0.001843
Aspni5_125698	0.0035358	0.013961	0.0069956	0.0084629	0.0037997	0.0085746	-0.0055323	0.0016275	0.0047029	0.00144
Aspni5_125592	0.00041116	-0.0054621	0.005324	-0.0072116	-0.0048121	-0.002454	-0.0050513	-0.0081328	-0.0074078	-0.0047712
Aspni5_125440	-0.019717	-0.0018808	-0.024904	-0.022757	-0.0073507	0.0095791	0.0076072	0.034948	-0.010951	0.010304
Aspni5_125309	0.0083573	-0.0053787	0.0028712	-0.00075479	-0.0064144	-0.0028725	0.0031169	-0.0071733	-0.00066739	0.0028456
Aspni5_125264	0.010629	0.002035	-0.013368	-0.0012131	0.0043637	0.0016643	-0.012925	0.016196	-0.013729	-0.0084592
Aspni5_124948	0.0032601	0.0023231	0.0058195	0.00074371	0.003873	0.0002263	-6.6763e-05	0.0047996	0.0034066	-0.0018088
Aspni5_124807	-0.025403	-0.01944	0.029287	-0.011976	-0.00033965	-0.018926	-0.0068367	-0.0078546	0.015191	-0.01063
Aspni5_124716	0.00092471	-0.0016143	0.0047399	-0.0014066	0.00028791	0.00047813	-0.0032912	0.00064595	-0.0058716	-0.003929
Aspni5_124692	0.0093755	0.0073387	-0.0017981	-0.0096604	0.0076467	-0.0074402	0.0005028	0.013265	0.0043858	0.0028151
Aspni5_124569	0.0010121	-0.0017964	-0.00071093	-0.0068863	0.002454	-0.0014561	-0.0040954	0.0058015	0.0010635	0.014204
Aspni5_124357	0.0023606	-0.0035409	0.001512	0.0013772	0.0019727	0.0040629	-0.00042952	0.0015626	0.0067183	0.008163
Aspni5_124352	0.0035908	0.0022866	-0.0015858	-0.0010255	0.0040747	-0.0045518	-0.00064104	-0.0014396	-0.0041199	-0.0037237
Aspni5_124153	0.00123	0.0069928	-0.010199	0.011146	-0.0051083	0.014284	0.00049053	-0.018219	-0.0020964	0.0062378
Aspni5_124037	0.0019593	-0.0087901	-0.00066361	-0.0013453	-0.0003135	-0.010521	-0.011791	0.014857	-0.0063464	-0.0052798
Aspni5_123955	-0.038169	-0.02194	0.024264	-0.00098749	-0.026074	0.021815	0.0025173	0.024375	-0.0025318	0.00089441
Aspni5_123782	-0.017339	-0.016312	0.0032166	-0.016148	-0.018186	-0.019485	0.0057814	0.0020407	0.019719	-0.0035897
Aspni5_123586	0.016763	0.017918	-0.05105	-0.0039479	-0.051473	0.05062	-0.0083865	0.0074713	0.033275	-0.020687
Aspni5_122999	-0.014558	-0.0094834	-0.0034023	-0.0045769	0.0082972	-0.011606	-0.0025279	0.022309	0.0030696	-0.0086822
Aspni5_122948	0.00046348	-0.0021292	0.0014971	0.00098327	0.0033391	-0.00087474	-0.00099072	0.0032554	0.00012745	0.00043202
Aspni5_122658	0.0059219	0.0038083	0.0046883	-0.0056622	-0.0041856	0.0032395	-0.013512	0.00619	0.0052727	-0.00095439
Aspni5_122445	0.00014175	0.0039658	-0.0025313	-0.0010939	0.00016625	-0.004689	-0.01034	0.0051266	-0.0057472	0.0073159
Aspni5_122397	-0.0024143	-0.024408	0.0058828	0.00038849	-0.00064876	-0.02037	0.020538	-0.0063806	0.00017903	0.00090887
Aspni5_121822	-0.0016561	-0.0048829	-0.0054209	-0.0017296	0.0049531	-0.012751	-0.0042479	-0.012794	0.011361	0.0098556
Aspni5_121820	-0.0035735	0.014407	0.0054332	-0.010955	-0.0049981	-0.003979	0.0013227	0.00403	0.011939	0.0169
Aspni5_121777	-0.0027705	-0.0038397	0.0089323	-0.0043249	0.00070761	-0.0070946	-0.0064011	0.0053093	0.0093157	-0.0066415
Aspni5_121272	0.0064409	-0.0056811	-0.0063277	0.00068148	-0.003301	0.0068475	-0.0029701	0.0038638	-0.0033698	-0.00033156
Aspni5_120862	0.0045217	0.00010582	0.0071912	0.0046611	-0.0048033	-0.0015602	-0.0013331	0.0015988	0.0028933	-0.0033465
Aspni5_120556	-7.3024e-05	-0.0011747	0.0079153	0.0057605	0.0051045	-0.0015903	0.012194	-0.0055322	0.008011	0.00063505
Aspni5_120396	0.0024116	0.00051268	-0.0013187	-0.0124	0.0086737	-0.0016978	-0.010434	0.0023097	0.0056579	-0.0038221
Aspni5_119995	-0.0062931	-0.013	-0.00473	0.0067514	-0.0083115	-0.0074528	-0.014918	0.015069	0.0011892	0.0082413
Aspni5_118792	-0.0036955	-0.0069913	-0.0032852	0.0034494	0.001652	-0.0016385	-0.00059957	0.002522	0.010445	0.0017724
Aspni5_118662	0.016991	-0.0067973	-0.0083375	-0.011767	-0.0084768	-0.0036009	0.017204	0.0067562	-0.014297	0.010031
Aspni5_118644	0.00053864	0.00020682	-8.704e-05	0.00074027	0.00017539	-0.00028397	0.00058212	0.00059696	0.00037374	0.00040182
Aspni5_118635	-0.00043311	0.0085707	0.0063436	0.0015008	0.0039993	-0.0026735	0.0021121	0.013508	0.0031694	0.030794
Aspni5_118581	0.01821	-0.017653	0.0099999	0.0086462	0.0035925	0.0067594	0.01516	0.0099824	0.0021781	0.015649
An19g00420.Aspni5_46137	0.0084432	-0.006345	0.0022569	0.0065683	0.0019337	0.0054032	0.0011142	0.00589	-0.010717	0.0071824
An19g00410.Aspni5_195305	0.0096262	-0.0051323	0.0052422	-0.0052827	0.0020499	0.0026923	0.0071691	0.0072814	-0.0089875	0.0010347
An19g00400.Aspni5_46135	-0.0015093	-0.0015333	-0.0023654	0.0016978	0.003064	-0.0026959	0.00082008	0.0053201	-0.0038511	0.0075126
An19g00390	0.011414	0.0056437	0.0018918	-0.0012568	-0.019197	-0.015754	0.00029432	-0.0077483	0.00038025	-0.0073415
An19g00380.Aspni5_46134	0.0075923	0.01576	0.0096106	-0.0077309	-0.013845	-0.0090348	0.0029673	-0.0094256	-0.0031978	0.0044212
An19g00370	-0.00044029	0.00012014	-0.0017877	1.6019e-05	0.0037295	-0.0013555	-0.011605	-0.0074419	-0.00061664	0.0050454
An19g00360.Aspni5_46133	-0.0041433	-0.00248	0.0051715	-0.0036291	-0.0040248	-0.0013009	-0.0028518	-0.0084994	0.0029946	-0.0075463
An19g00350.Aspni5_138839	0.004189	0.00032805	0.0030983	-0.0022236	0.00047875	-0.00098718	-0.0004228	0.0059858	-0.00049523	0.0014537
An19g00340.Aspni5_214891	0.0016003	-0.011164	0.008395	-0.011254	-0.006844	-0.00068066	0.0031109	0.010092	-0.0089123	-0.0056914
An19g00330.Aspni5_55215	0.0021937	-0.010312	0.0082357	-0.0062482	-0.0077767	-0.00071198	0.0020753	0.0080562	-0.013924	-0.0064886
An19g00320	0.0014348	-0.0030936	0.0047516	-0.0039804	0.002	-0.0016642	0.0032902	0.0081443	-0.00082022	0.00068182
An19g00310	-0.0018889	0.003975	-0.0018044	0.0024907	0.0092642	-0.0063549	0.0041416	-0.0033808	0.012744	0.0077177
An19g00300.Aspni5_55214	0.0039331	-0.0088245	0.0098475	-0.0099625	-0.0024918	9.6005e-05	0.0052307	0.0066785	-0.0075602	-0.0077323
An19g00290.Aspni5_214881	0.0063912	0.0040047	-0.00061063	-0.003396	-0.0025942	-0.0030697	-0.00011638	0.003859	-0.0014315	-0.0085797
An19g00280.Aspni5_136048	0.0048734	-0.00076508	0.0033727	-0.007268	-0.025055	-0.0073628	-0.0028059	-0.007504	0.0063992	-0.0057165
An19g00270.Aspni5_55212	0.0051236	0.016835	0.0010072	0.008618	-0.011373	-0.0066576	-0.0076854	-0.013265	0.017194	0.016878
An19g00260	0.0030832	-0.0075889	-0.0028871	-0.0099163	-0.0067587	-0.013488	-0.014606	0.0042858	0.0079516	0.0096558
An19g00250	0.0079649	0.0030639	0.0099887	0.0030299	0.004696	0.0037512	-0.015265	-0.0054731	0.0042831	0.003922
An19g00240	0.0040612	0.0022158	0.0063185	0.0017614	-0.0041742	0.0024779	0.0038508	-2.5195e-05	0.0081673	0.00088907
An19g00230.Aspni5_214877	0.010755	-0.0048067	0.011338	-0.00070333	-0.0039158	0.01137	0.0019078	0.0013289	0.0016104	0.0023565
An19g00220	-0.0040447	-0.0036426	0.0086537	0.00088436	0.00079557	0.0021175	-0.0046664	0.0041736	0.0060298	-0.0026014
An19g00210.Aspni5_214876	0.00096841	-0.0015909	0.0037138	0.0043248	-0.0043167	-0.0029606	-0.01283	-0.0023441	-0.00054278	-0.010321
An19g00200.Aspni5_142324	0.0078054	0.012791	0.0060854	-0.006584	0.0045977	-0.0018047	-0.016383	0.0054434	0.0059788	-0.0042874
An19g00190	0.0085938	0.012617	0.009634	-0.014048	0.0081352	-0.003954	-0.016889	0.0029993	0.018754	0.001832
An19g00180.Aspni5_195235	0.012094	0.0045667	0.0082657	-0.0032535	0.0061833	-0.0033392	-0.014975	0.0048346	0.0097103	-0.0020354
An19g00170.Aspni5_46123	-0.011506	-0.00075323	0.0029137	-0.012889	0.0089719	-0.0067756	0.0066935	0.008089	-0.0059619	0.012932
An19g00160.Aspni5_46122	0.0041431	-0.001626	0.0063735	-0.001956	0.010877	0.00092389	0.0023843	0.0052703	0.012668	-0.0027835
An19g00130.Aspni5_122757	-0.0035382	-0.0063536	0.0035477	-0.0038654	0.0062803	-0.0096239	-0.00013283	0.0014523	0.0059577	0.0017328
An19g00120.Aspni5_195287	0.0066421	-0.0010798	0.0080613	-0.0044059	-0.0094766	-2.0697e-05	0.003768	-0.0020138	0.0034277	0.0061807
An19g00110.Aspni5_46117	-0.0097292	-0.0096344	0.011128	0.0065948	-0.0058419	0.0014511	0.0005606	0.00012964	0.0090616	0.0038334
An19g00100.Aspni5_122923	-0.00068175	-0.018028	-0.0098815	0.028432	-0.03587	0.035933	-0.011768	-0.037008	0.032717	0.040943
An19g00090.Aspni5_46115	0.0038043	-0.0056847	-0.010265	0.017191	-0.0085352	0.012854	-0.012157	-0.01196	0.0048635	0.011415
An19g00080.Aspni5_46114	0.0025586	-0.0066304	0.0020113	0.0041984	0.00011499	-0.0017377	-0.0045875	-0.0025152	0.0089832	-0.0070843
An19g00060.Aspni5_195312	0.0063715	-0.0018186	0.0022758	-0.0017521	0.004343	0.0081039	-0.0028401	-0.0090839	0.007921	-0.0025392
An19g00050.Aspni5_195254	0.014887	0.0097343	0.0042789	-0.0015513	-0.010509	0.0019533	0.0017302	-0.0043022	0.0018186	-0.0041448
An19g00040.Aspni5_195249	0.012834	-0.0023528	-0.0017795	-0.0016784	0.0019867	0.002024	-0.013832	0.0012347	0.0031126	-0.0012113
An19g00030.Aspni5_46109	0.0058113	0.0075196	-0.001986	-0.01115	-0.0099692	0.007791	0.0076695	0.014977	0.0085479	0.01116
An18g06850.Aspni5_143709	0.0031717	-0.0053937	-0.0037414	-0.004219	0.0029418	-0.00070916	-0.0095943	0.0012481	-0.00061461	-0.001198
An18g06820	-0.0001544	-0.00053361	-0.0032347	0.0025607	0.00095378	-0.0081038	-0.006817	-0.00028138	-0.00059795	-0.00035601
An18g06810	0.003389	-0.000389	0.0019723	-0.0034872	-0.0056777	-0.001437	-0.0036904	-0.0026441	-0.0038149	-0.0045296
An18g06800	0.0016244	-0.00053108	0.0040492	0.00072597	-0.0044339	-0.0006021	-0.0065552	-0.00079508	-0.0051872	-0.0014061
An18g06790	0.0039334	0.00092833	-0.0038285	-0.0019653	0.0026258	-0.00040768	-0.0083518	0.0033379	0.0019208	-0.00091761
An18g06780.Aspni5_43055	0.0073218	0.00022457	-0.00038711	0.0014176	-0.0013224	-0.002456	-0.0031536	0.0027195	-0.0034196	-0.0029985
An18g06770.Aspni5_187600	0.00065556	-0.0038461	-0.0016445	-0.0030966	0.022599	0.0028576	0.0098732	0.0099571	0.0096424	-0.0039826
An18g06760.Aspni5_212289	-0.0069306	-0.0033603	0.0034119	-0.0011589	0.0046326	-0.0018753	0.0053703	-0.0030166	0.0037796	0.0019379
An18g06750.Aspni5_56855	0.0052948	-0.0028249	-0.0042961	0.0030228	0.00046511	-0.004035	-0.0021776	0.0018434	-0.0019514	-1.3121e-05
An18g06740.Aspni5_212285	0.0029654	0.0004244	0.0017285	0.00081158	-0.0017703	0.00057282	-0.0029222	-0.00019609	-0.00084867	-0.0034537
An18g06730.Aspni5_187010	0.0029332	0.0017139	0.0042694	-0.0013042	0.00031688	-0.0036667	0.0030136	0.0010247	0.0090125	0.00078483
An18g06720.Aspni5_49989	0.0022437	-0.0028677	0.00039907	-0.00056398	0.0021112	-0.0039269	-0.0012556	0.0045563	0.00045044	0.0029511
An18g06710.Aspni5_56853	0.0035253	-0.0043581	-0.0032843	-0.0015104	-2.6284e-05	-0.0035139	-0.0049051	-0.00068648	-0.0043997	0.00097842
An18g06700.Aspni5_54260	0.0018919	-0.0025669	0.0021182	-0.0016652	-0.0024852	-5.1077e-05	-0.0070149	0.00052796	-0.0056114	-0.0011934
An18g06690.Aspni5_143164	0.0037064	-0.0014383	-0.00065788	-0.002559	0.0024363	-0.0052231	-0.0068918	0.0030896	-0.0005749	-0.0017125
An18g06680.Aspni5_43045	0.0023715	-0.0012717	0.0029329	-0.00161	-0.0038496	-0.0017446	-0.0060932	-0.0021693	-0.0055973	-0.00071877
An18g06670.Aspni5_43044	-0.0040744	0.0062961	0.0076189	-0.01132	-0.00054853	0.0033315	0.0016984	0.0014017	-0.0012039	-0.003405
An18g06660.Aspni5_187681	-0.006882	0.00047221	-0.0033251	-0.016321	0.0099105	0.0048413	-0.0026164	0.0026378	-0.003832	0.0044806
An18g06650.Aspni5_212275	-0.017758	-0.0045805	-0.011158	-0.022086	0.0085989	0.016287	0.019695	0.01224	-0.0089503	0.013502
An18g06640.Aspni5_43042	0.0046981	-0.0050528	-0.0034746	0.0059698	0.00084695	-0.0070246	-0.00047466	-0.0025686	0.0026203	-0.0024651
An18g06630	-0.0012078	-0.0093272	-0.002641	-0.013764	0.0024272	-0.0023129	-0.015475	-0.014551	0.0024416	0.028957
An18g06620	0.0033534	-0.0015802	0.0010119	-0.009773	0.0054046	0.0017537	-0.0055883	0.0032111	-0.0040648	-0.0038735
An18g06610.Aspni5_54258	0.0035248	-0.0012432	0.0024912	-0.0016235	0.00033867	-0.0037032	-0.0051886	8.2155e-05	0.00062773	-0.0049502
An18g06600.Aspni5_126281	0.0015359	-0.0014629	0.00096795	0.0026485	-0.00010802	-0.0031407	-0.0043659	0.0012955	-0.0028509	0.002026
An18g06590.Aspni5_212272	0.0022303	-0.0012423	0.0088317	0.00055039	-0.0058269	0.0013011	-0.0050226	-0.0044856	-0.0030467	-0.002667
An18g06580.Aspni5_187949	0.0086197	0.011674	-0.0024377	0.0035278	0.003465	0.0044139	-0.0034953	0.0016146	-0.0069963	0.0041969
An18g06570.Aspni5_212265	0.00079677	0.0070887	0.0013865	-0.0037744	-0.0030882	-0.0024966	0.0024245	-0.0017163	0.0052141	-0.00073988
An18g06550	0.0019744	-0.0021196	0.0022726	-0.0047323	0.0040491	0.00077335	-0.00056949	-0.009276	0.019208	0.0029443
An18g06540.Aspni5_212262	-0.00114	0.00061976	0.0043046	-0.0047712	0.0015807	-0.0028974	0.0061717	0.0067724	0.0085706	0.0090213
An18g06530	-9.1351e-05	-0.0049975	0.0034669	-0.0070205	-0.0045545	0.0033849	-0.0018938	0.007085	0.003483	0.00086355
An18g06520.Aspni5_43035	0.0034522	0.0036804	0.0084323	-0.0028371	-7.419e-05	-0.0023381	-0.0053385	0.0018727	-0.0023168	-0.00037305
An18g06510.Aspni5_187283	0.0023178	-0.00081165	0.0092188	-0.0044329	0.0025688	-0.0021066	-0.0021372	-7.7949e-05	0.0021883	-0.0024262
An18g06500.Aspni5_132771	0.0023103	-0.0040376	0.0045206	-0.00041172	-0.0085311	0.0014032	-0.0053573	-0.003208	-0.0034797	-0.0021602
An18g06490	0.0017521	0.0027134	-0.0021721	-0.00511	-0.0011135	-0.0052965	-0.011408	0.0086017	-0.0032006	-0.0050243
An18g06485	-0.0018786	-0.00034937	0.010743	-0.0040691	-0.0064145	-0.0022364	0.0011336	-0.0018879	0.0011835	0.0054547
An18g06470.Aspni5_124206	-0.0017111	-0.00080861	0.0024434	0.0050532	-0.010044	-0.0014832	-0.0014485	-0.0057364	0.0022143	-0.00081982
An18g06460	0.0072961	0.0088205	-0.0036152	0.0078675	-0.0087066	-0.0052776	-0.008416	0.0029103	-0.0069919	-0.0043686
An18g06450	-0.0018431	-0.0014525	0.0011853	0.0049511	0.0056647	-0.0037242	-0.006071	0.0016778	0.0020558	0.0029411
An18g06440.Aspni5_188015	0.0013301	0.0030703	0.00057108	0.0039964	-0.004173	-0.003594	-0.0014419	-0.0029081	0.00074135	0.00024082
An18g06430.Aspni5_43028	0.0011832	0.0026371	-0.00057361	0.0029335	-0.0042382	-0.0029118	-0.00040656	-0.0030039	-4.9745e-05	0.0006432
An18g06420	-0.0030936	-0.00024361	-0.00020847	-0.0081151	0.0011687	0.0034784	-0.002686	0.0070607	-0.0032132	-0.0025839
An18g06410.Aspni5_56846	-0.012551	-0.0073707	-0.004366	-0.01061	0.0094867	0.010331	0.00074957	-0.0037418	-0.0014262	0.0042908
An18g06400	3.8503e-06	-0.00048882	0.00091558	-0.0021085	-0.0008218	-0.0026287	-0.0045869	0.00011034	-0.0037522	0.00021273
An18g06390.Aspni5_54250	0.0041891	0.001177	0.002174	-6.5212e-05	0.0080757	0.010533	0.0032062	0.0063515	0.0030131	0.0013432
An18g06380	0.0038863	0.0045823	-0.00084511	-0.0063223	-0.0058129	2.2553e-05	0.0043544	0.0032635	0.0028954	-0.0048909
An18g06370.Aspni5_188030	0.021679	-0.0092025	0.0047608	-0.0017151	-0.0019431	0.0077125	-0.00077656	-0.0026693	-0.0042898	0.0085582
An18g06350.Aspni5_187626	0.0029999	-0.0021542	0.0065546	0.003504	-0.0058232	-0.0025374	-0.0046807	-0.0036055	-0.001233	-0.0024057
An18g06340.Aspni5_188048	0.0041204	-0.0032078	0.0097883	0.0020286	-0.0043972	-0.00063893	-0.0047832	-0.0030077	-0.0021084	-0.001415
An18g06330	0.0014338	-0.0036736	-0.0022571	-0.0057316	-0.0038363	0.0034707	0.006751	0.0090933	0.0012369	0.011389
An18g06320.Aspni5_212247	-0.0015625	-0.0015791	-0.001297	-0.00082785	0.0023348	0.00027073	0.0012769	0.0010781	0.0079339	0.00018197
An18g06310.Aspni5_123018	0.013802	0.016191	-0.022077	-0.0035196	-0.018979	0.018345	0.0027224	0.0095298	0.014753	-0.015995
An18g06300	0.011837	0.0095151	-0.014551	0.00076224	-0.0068051	0.018324	-0.001099	0.0095461	0.015448	-0.016643
An18g06290.Aspni5_202702	-0.0028481	-0.00015967	-0.0033563	-0.0018476	0.0065952	0.0010177	0.0049092	0.0026209	0.00072832	0.0059465
An18g06280	0.00067614	-0.0028793	-0.0042162	-0.0099415	0.004817	0.0019997	-0.0038691	0.0062341	-0.0020369	-0.00097862
An18g06270.Aspni5_202700	0.0011783	0.0012623	0.0020701	0.002619	-0.00014233	-0.00013413	-0.00020646	-0.0039842	-0.0002683	0.0019467
An18g06260.Aspni5_54246	0.0014276	2.7809e-06	0.0011793	0.0021199	0.00034704	-0.00056049	0.00091607	-0.00070627	-0.0031647	0.00058863
An18g06250.Aspni5_202692	-0.0017934	-0.0056088	0.0042569	0.0071447	0.0023413	-0.0012014	-0.0041808	-0.0044971	-0.0017036	-0.00059209
An18g06240	-0.0009076	-0.011541	0.0099232	-0.0047421	-0.0048505	0.0015351	-0.015089	-0.00084948	0.0097858	-0.0064999
An18g06230.Aspni5_212230	0.0013414	-0.00052524	0.004022	-8.3071e-05	-0.0021843	-0.0030569	-0.0051563	-0.0031603	-0.0039561	0.00015038
An18g06220.Aspni5_56841	0.0013339	0.0027878	0.0014514	0.00019496	-0.0049198	0.00058077	-0.0015689	0.0010726	0.0069674	-0.0025746
An18g06210.Aspni5_49967	-0.0025801	-0.00044998	0.0031231	0.0066912	-0.002599	-0.0030549	-0.0047004	-0.0029461	0.0049435	-0.001257
An18g06200	-0.003204	-0.0048382	-0.0038302	-0.0076574	0.00076193	0.0010105	-0.0081841	0.0055058	-0.0042816	-0.0010362
An18g06190.Aspni5_122402	-0.0017157	0.0022502	-0.0032366	0.0022744	0.0011292	-0.0022542	-0.0003953	0.0062288	9.0267e-05	0.0035375
An18g06180	0.0019634	0.00062832	-0.00055897	-0.001482	0.0028923	-0.0094093	-0.0049768	0.010664	-0.0062134	0.0057444
An18g06170.Aspni5_122702	-0.0066935	-0.0036893	0.0041639	0.0021073	-0.001002	-0.0033294	-0.012286	0.0034423	0.00045018	0.0010529
An18g06160.Aspni5_43012	-0.0068246	-0.0021816	-0.0011619	-0.0024015	-0.0042308	0.0040238	-0.0033321	-0.0023211	0.00028937	-0.0015996
An18g06150	-0.0098089	-0.0014522	-0.0003354	-0.010495	-0.00023357	0.01633	0.002675	0.002323	0.026328	0.0014137
An18g06140	-0.014701	-0.0032721	0.0030672	0.0019062	-0.00037545	0.0092464	0.010755	0.0047405	0.016325	0.012025
An18g06130.Aspni5_202682	-0.010392	-0.0027843	0.0023607	0.0014597	0.00050719	0.0074004	0.0039367	-0.0013797	0.005884	0.0042647
An18g06120.Aspni5_186948	0.00046717	-0.00029382	0.0053897	0.00076117	-0.0016828	-0.0021783	-0.0027348	-0.0010511	0.0057718	0.00031124
An18g06115	0.00015741	-0.0036197	-0.0038581	0.0013027	0.0047699	-0.0054622	0.00046199	0.0010137	0.0061539	0.0043205
An18g06110.Aspni5_54241	-0.00066298	-0.0021819	-0.0027371	0.0048274	0.0058009	-0.0055527	0.0029889	-0.00061245	0.0084841	0.00496
An18g06100	-0.0035449	-0.0097178	-0.0021698	-0.0036578	-0.0019802	-0.0068401	-0.009994	-0.0027042	-0.0011842	0.012578
An18g06090	0.0017344	-0.015232	-0.0030318	-0.015584	0.0046279	-0.0055978	-0.014678	0.010056	0.011261	0.003704
An18g06085	-0.009994	-0.0052099	-0.00033705	-0.0029257	-0.0059696	-0.003519	-0.0040864	-0.00012932	0.0076751	0.012231
An18g06080	0.0065318	-0.0057525	-0.011387	-0.0090506	0.0066107	-0.010568	-0.0073318	-0.0082661	0.014124	0.0082571
An18g06070	-0.0060778	-0.0097283	-0.0078214	0.0048172	0.013491	-0.0035737	-0.0046557	0.0034429	0.010967	0.005142
An18g06060	-0.0013042	-0.015072	0.002314	0.0017632	0.0015074	-0.0086523	-0.011775	0.0092455	0.0074171	-0.012757
An18g06050.Aspni5_202677	-0.0023492	0.0012093	0.0025423	0.0014437	0.0027205	-0.0041685	0.0044728	-0.0022058	0.0069788	0.0039903
An18g06040	-0.00167	0.0032787	-0.0099818	-0.010079	0.006264	-0.0066862	-0.0024901	0.0034684	-0.0014703	0.0059407
An18g06030	0.0061385	-0.003593	0.0054328	-0.0035505	0.0027883	-0.0031215	-0.0046618	0.0021953	0.004536	-0.0020392
An18g06020.Aspni5_187028	0.0032654	-0.0033143	0.0029325	0.0018714	-0.0019132	-0.0053334	-0.001399	-0.0015446	0.0018335	0.00019244
An18g06010.Aspni5_56837	-0.0015667	-0.0021809	0.00074265	0.0033317	2.0698e-05	-0.0043888	-0.0032335	-0.00037951	-0.0001409	0.0056893
An18g06000	0.00050952	-0.0019595	-0.0052507	-0.013351	0.0034482	0.0025456	-0.0074107	0.00018989	-0.0042925	-0.00056515
An18g05990	4.8219e-05	-0.0040235	-0.0040435	-0.0064534	-0.0016903	0.0027222	-0.0033501	0.015578	0.017908	0.013293
An18g05980.Aspni5_56836	0.0031576	0.00095071	0.00070156	0.0010653	0.00099857	-0.0012386	-0.00064718	-0.0011521	-0.0018746	0.00031399
An18g05970	0.0045513	0.0010235	-0.00034866	-0.00024067	0.0016588	-0.00062367	-0.00070043	0.0002442	-0.0011	0.00033595
An18g05960.Aspni5_212204	0.0035662	0.0038678	-0.0047214	-2.3889e-06	0.0018244	0.0011975	0.0035651	0.0011856	0.0080263	-0.0054632
An18g05950	0.0047897	0.0024778	-0.0028216	-0.0036174	0.00080159	0.0013451	-0.00039421	0.002832	0.0044264	-0.0064954
An18g05940.Aspni5_187227	-0.0034562	0.016699	-0.027437	0.019644	-0.013296	-0.0018088	-0.0050581	0.028693	0.021189	0.0076231
An18g05930	0.0052683	0.0052686	-0.0040007	-0.0038799	0.0059603	-0.0094207	-0.0053209	0.007773	-0.00020886	-0.0052559
An18g05920.Aspni5_120185	0.00069261	0.004462	0.0017093	0.00049649	0.0094882	-0.0039145	0.0097512	0.00062277	0.0081659	0.0052249
An18g05910.Aspni5_54233	-0.0016681	0.0022719	-0.00080792	0.0057152	0.00092511	0.0030674	0.0016718	-0.0019282	0.0053053	-8.3539e-05
An18g05900.Aspni5_187108	-0.0051666	-0.0033861	0.0010705	0.0075066	0.0029349	0.0068894	-0.00073157	-0.0036969	0.0043178	0.0093714
An18g05890.Aspni5_212197	-0.0026721	0.00081049	0.0005981	0.0038022	0.0037901	0.002915	0.0015542	-0.0038969	0.0010263	0.0063807
An18g05880.Aspni5_186978	-0.00088028	-0.00045411	-0.0028806	0.0026904	0.0039934	0.001617	-0.0016575	0.0016792	-0.0026754	0.0072535
An18g05870.Aspni5_187479	-0.0031155	-0.0019123	-0.017557	0.0021653	0.016185	0.0094204	0.0083001	-0.0026902	0.00094302	0.012528
An18g05860.Aspni5_202653	0.00092127	-0.003624	-0.00075854	0.003244	-0.0020102	-0.00025051	-0.0056094	-0.0043059	-0.0068617	-0.0012373
An18g05850.Aspni5_212193	0.00065222	-0.00036522	0.0062129	-0.00084985	0.00375	0.0033127	-0.0023794	-0.0034305	-0.00063441	-0.00026162
An18g05840.Aspni5_42987	0.014691	0.00024969	-0.0016457	-0.0071467	0.011133	0.0026772	0.0062416	-0.020375	-0.0069924	-0.00092957
An18g05830.Aspni5_212190	0.0017564	0.0012742	-0.003047	0.0061984	0.0034641	-0.004656	0.00025492	-0.003957	0.0044305	0.00094644
An18g05820.Aspni5_54229	-0.0085836	-0.0029265	-0.0012431	0.0057393	0.0060836	0.0048088	0.0017736	-0.0018496	0.0036134	0.0056503
An18g05810.Aspni5_212184	0.00054887	-0.0034147	-1.3687e-05	0.0039916	-0.002653	-0.0030457	-0.0073866	-0.0031223	-0.0040762	-0.00056827
An18g05800.Aspni5_187314	-0.00092864	0.0011751	0.00076315	-0.0033853	0.0055253	-0.0015009	0.0029777	0.0030329	-0.00050015	0.0046595
An18g05790.Aspni5_212182	-0.0018654	-0.0015019	-0.0014999	-0.0093976	-0.0025608	-0.0019448	0.00052357	0.0049765	-0.0046976	0.0032971
An18g05780.Aspni5_42981	0.0058544	0.0035543	0.0055275	-0.00080108	0.0022524	-0.0039443	-0.0077551	-0.0010686	-0.0015942	-0.0046256
An18g05770.Aspni5_212180	0.00046443	-0.001009	0.0019876	0.0056286	-0.0032151	-0.0031888	-0.0018035	-0.0051573	-0.0034515	0.00081762
An18g05760.Aspni5_187673	0.0028294	0.0051372	0.00074845	-0.0053358	0.0047357	0.000916	0.0053199	-0.00046311	-0.0027876	0.0028468
An18g05750.Aspni5_202631	0.0053584	-0.0027806	-0.00029155	-0.0018555	-0.0010996	-0.0045314	0.00053504	-0.0006713	-0.0050461	-0.0014505
An18g05740.Aspni5_54223	0.00071461	0.00083031	0.0096295	-0.00017675	-0.0022422	0.0016898	-0.0014041	-0.0055456	-0.0037714	0.00034483
An18g05730.Aspni5_187263	0.007557	0.013088	0.004715	0.0055784	0.0016089	0.0030419	0.0032844	0.0013288	0.011665	-0.0010245
An18g05720.Aspni5_187727	0.0025501	0.0038827	0.008176	0.0013971	-0.0018751	0.00070895	-0.0014572	-0.0035251	-0.00084578	-0.00034656
An18g05715	0.0041876	0.016789	0.0093675	-0.0045119	0.0021473	0.0154	-0.0093304	0.0034148	-0.0067993	-0.0035266
An18g05710	0.001616	-0.0020012	-0.00059996	0.0061984	0.0061343	-0.0062743	-0.0036726	0.0036429	-0.0063666	0.0031895
An18g05700.Aspni5_212167	0.0097894	0.0042292	-0.0098619	-0.0017099	0.022078	-0.0085336	0.0055022	0.003176	-0.0072652	0.0049389
An18g05690.Aspni5_202623	0.0016222	-0.00049034	0.0038021	0.0033078	-0.0009592	-0.0018715	0.00072629	-0.0033886	0.0027739	0.0032437
An18g05680.Aspni5_212162	-0.0021313	-0.0026547	0.0014159	0.0016566	-9.5708e-05	-0.0001211	-0.0041	-0.0021545	-0.0039448	0.0029568
An18g05670.Aspni5_54218	-0.0017901	0.0011577	0.0024229	0.0073325	-0.0018881	0.0022252	-0.0056188	-1.5639e-05	-0.0035987	0.0063951
An18g05660.Aspni5_42969	0.0063299	-0.0084774	-0.012616	0.0010752	-0.0081592	-0.017525	-0.036112	0.00045641	0.012695	0.00069118
An18g05650.Aspni5_122199	0.0014705	-0.00084066	-0.0043284	0.0033069	0.0025199	-0.0066312	-0.003147	0.0032692	0.0038232	0.004883
An18g05640.Aspni5_54217	-0.00041112	0.0031679	0.00035409	-0.0082436	0.0060168	-0.00035291	0.0024393	-0.0008477	-0.00171	0.0044438
An18g05630.Aspni5_212155	-0.0016243	-0.0036818	-0.0030391	0.001456	-0.00076234	-0.0057784	-0.0036796	-0.00047747	-0.004403	0.0025863
An18g05620.Aspni5_49940	0.0019951	0.030362	0.009075	0.0044735	-0.0055615	-0.0019827	-0.009757	-0.0045933	0.0072323	0.01835
An18g05610.Aspni5_187486	0.0061414	0.02495	0.012696	-0.0042431	-0.0015246	-0.0029129	-0.0085183	0.0030351	0.0047767	0.0096667
An18g05600.Aspni5_187778	0.013164	0.016801	0.0057238	-0.003373	-0.0026821	0.013118	-0.011144	0.00058936	-0.004182	0.0049487
An18g05590.Aspni5_42962	-7.3593e-05	-0.0029876	0.0045506	0.0050823	-0.00046788	-0.0044334	0.003016	-0.0022673	-0.00097204	0.0082275
An18g05580	-0.00043939	0.00081889	0.0015995	0.00097084	-0.001792	0.00053115	-0.00067747	0.00085727	-0.0010934	-0.00086408
An18g05570.Aspni5_187649	0.0018532	-0.00010083	0.0058426	0.00089481	-0.00463	-0.0060369	-0.00024716	0.0014841	0.0030755	0.00277
An18g05560.Aspni5_187701	0.0052791	-0.0021243	0.001486	-0.0046165	-0.005908	-0.00094584	-0.0091429	0.00041638	-0.0059693	-0.0064985
An18g05550.Aspni5_187802	0.0071791	-0.0034647	-0.0013058	0.0020876	-0.0042119	-0.0054403	-0.0057187	-0.0024212	-0.0054607	-0.013991
An18g05540.Aspni5_188031	0.0018906	0.0038423	0.0040235	-0.0027794	0.0020401	0.001594	-0.0026551	0.0032324	-0.0049904	-0.00041598
An18g05530	0.00036541	0.001416	0.0072173	0.0027467	0.0036759	0.0094942	-0.0014565	0.00076731	0.0097655	0.0096984
An18g05520.Aspni5_56822	0.0032476	0.0062566	0.0039484	0.00070671	0.0016701	0.0016671	-0.0029249	0.0019451	-0.0011159	0.0053423
An18g05510.Aspni5_54213	0.0092201	0.0034425	-0.0091518	-0.010018	-0.018717	-0.016731	0.014401	0.0070793	0.025971	-0.017825
An18g05500.Aspni5_120161	0.027088	0.014963	-0.012177	-0.021253	0.0036733	0.0033727	0.018778	-0.01014	-0.01259	-0.0017263
An18g05490.Aspni5_137408	0.0023759	0.0005199	0.0057171	0.0034025	-0.0015574	-0.0021848	-0.0036595	-0.0019582	-0.00038935	0.0012269
An18g05480.Aspni5_42956	0.015526	0.04245	0.0090612	-0.026942	0.0091312	0.00051952	0.0066923	0.003407	-0.01496	0.0074261
An18g05470.Aspni5_42955	-0.0043269	-0.0046265	0.00047777	-0.00010317	0.0022453	-0.0052894	-0.0016012	0.005279	0.0036214	-0.0047817
An18g05460	-0.0027772	-0.0046959	-0.011843	-0.020522	0.011592	0.0077255	-0.008792	-0.0048532	0.0033978	-0.00016752
An18g05450.Aspni5_212147	0.0077367	-0.0011188	-0.0091984	-0.0034082	0.00031566	8.9968e-05	-0.0053468	0.0050747	-0.011046	-0.010175
An18g05440.Aspni5_128267	0.00579	0.00064584	0.00061778	-0.0046225	-0.001334	-0.0024048	-0.0058105	0.0032426	-0.0055941	-0.0059086
An18g05430.Aspni5_136905	0.0037673	0.0017547	0.0013462	-0.0011033	0.00039515	-0.00096442	-0.00097859	0.0015483	-0.0052625	0.00067711
An18g05420.Aspni5_49934	0.0026983	0.0051813	0.0011935	0.0015281	0.0040849	0.00083829	0.0013837	-0.0010119	-0.0029704	0.0066377
An18g05410	-0.0015701	0.0048969	-0.0033388	-0.0072958	0.0097464	0.0031538	-0.0031311	0.0033985	-0.0040051	0.0034335
An18g05400	-0.0011448	0.0034937	-0.0038934	-0.010372	0.006642	0.0022258	-0.0078381	0.002969	0.0019438	0.0021512
An18g05380.Aspni5_212140	0.0002128	0.0050674	-0.0012472	-0.00050126	0.0071976	-0.00073914	0.0020511	0.0012277	-0.002789	0.0034459
An18g05370	0.0039259	0.0053978	-0.0018912	-0.0018898	0.007359	-0.0016035	9.9459e-05	0.0024544	-0.0026218	0.0010423
An18g05360	0.0017004	0.0022434	0.0011989	0.0023379	0.0055821	-0.0040222	0.00065992	0.0063435	0.0077397	0.0014917
An18g05350	-0.0034445	-0.0059944	-0.004691	-0.00026222	0.0059107	-0.00099063	0.0015088	0.0063862	0.0089319	0.0081427
An18g05340.Aspni5_42949	-0.0061291	-0.0023542	0.0014473	0.0041751	-0.0044443	0.0067153	0.0066264	0.0035696	0.016816	0.0057698
An18g05310	-0.0020127	-0.0026191	-0.0058692	-0.0073899	0.0043962	-0.0080164	-0.018954	0.0079465	-0.0035882	-0.00054547
An18g05290	-0.0006955	0.0035079	0.0011794	-0.0051838	0.00015984	0.0017523	-0.0033877	-0.0038546	0.003276	-0.00042932
An18g05280.Aspni5_42948	-0.0031438	-0.002195	0.0010492	0.0087087	0.018911	-0.0017147	0.010208	-0.0039629	0.013034	-0.015781
An18g05270.Aspni5_187878	0.0083152	-0.00016137	-0.0011041	-0.00041684	0.0071203	0.0036497	-0.0039826	-0.0015965	2.8749e-05	-0.0015669
An18g05260	-0.0035884	-0.001927	-0.0049211	-0.00061422	0.013438	-0.0078436	-0.013493	-0.0038365	0.012438	0.013808
An18g05250	-0.00069754	-0.0025311	0.0017828	-0.0024441	0.0071036	-0.006992	-0.0064962	-0.006736	0.01469	0.0068103
An18g05240.Aspni5_42946	0.0050989	-0.0010678	0.003687	-0.0039644	0.0019627	-0.0085795	-0.0096389	0.0060186	-0.00019055	-0.0051003
An18g05230.Aspni5_54208	0.0018698	0.00073486	0.0042165	0.0015327	-0.0010947	-0.0026602	-0.0036683	-0.0015793	-0.0045121	0.0015728
An18g05220.Aspni5_202592	-0.0032871	0.0050754	0.010168	-0.0038614	-0.0063367	0.001674	-0.0049049	0.0024049	0.00015813	-0.00088244
An18g05210.Aspni5_54207	0.0067899	0.017913	0.0080088	-0.011386	-0.0075111	0.003496	0.0050976	-0.0064621	0.0017434	-0.0022926
An18g05200	0.0050306	0.0016984	-0.0034363	7.6073e-05	0.00012027	-0.0071827	-0.0032911	0.0031404	0.0004697	0.00018444
An18g05190.Aspni5_56817	0.0036863	0.00082008	-0.0030768	0.0015036	0.00069995	-0.0073875	-0.0005554	0.0015302	0.00046073	0.0011799
An18g05180.Aspni5_212124	0.0013792	-0.0012555	0.0049492	0.00077013	-0.0038039	-0.0045473	-0.0065815	-0.00085837	-0.003751	-0.00089964
An18g05170.Aspni5_212120	-0.0014377	-0.005527	0.0020461	0.0091304	-0.0027058	-0.0037693	-0.0013287	-0.0032518	0.0013511	0.00026917
An18g05150.Aspni5_54204	0.0032953	-0.0046322	-0.003717	0.0026767	0.0039265	-0.0039578	-0.00099089	-0.0028061	0.00092802	0.0035507
An18g05140.Aspni5_187076	0.0015075	-0.0027289	-0.0022724	0.0030733	0.0029521	-0.0074342	-0.0038122	-0.0025427	0.0063417	0.0081634
An18g05130.Aspni5_49922	0.0020755	0.00092242	0.011685	-0.005509	-0.0025773	0.0026756	-0.0064285	-0.0076526	-0.0067462	0.0004931
An18g05120.Aspni5_212116	0.0007761	0.0057602	0.013683	0.00011507	-0.0030518	-0.0014312	-0.0044059	-0.0051012	-2.6326e-05	0.0043888
An18g05110.Aspni5_187094	-0.0023103	-0.00055161	0.0052605	0.0033865	0.0026827	-0.0045591	0.001516	0.0021106	0.0051086	-0.0016925
An18g05100.Aspni5_42934	0.0093456	0.0033829	0.000225	-0.0016585	0.001894	-0.0009678	0.00049616	-0.0063268	-0.0036728	-0.0036648
An18g05090.Aspni5_123517	0.0010341	0.002391	0.0055773	-0.0016491	-0.0040622	-0.0034988	-0.0006817	-0.0043666	0.0013516	-0.0013619
An18g05080.Aspni5_42932	0.0017851	-0.0012085	-0.0026308	0.0044856	0.0048178	-0.0046857	0.0026428	-0.0012634	0.0038046	0.0055505
An18g05070	0.00088754	-0.003022	0.0059419	-0.00047809	-0.0063421	-0.0010234	-0.0049434	-0.0050684	-0.0054988	-0.0027675
An18g05060.Aspni5_54201	0.00052441	0.00097085	0.0035778	0.0019038	0.0024007	-0.0013359	0.00044193	-0.0023487	0.0013187	0.0047166
An18g05050.Aspni5_212105	0.0042156	0.0042444	0.0012989	0.0026978	0.0027096	-0.0035258	-4.8577e-06	-0.0023892	-0.0024427	-0.00021343
An18g05040.Aspni5_54199	-0.0038005	0.0056539	0.011783	0.003768	-0.001371	0.00046805	-0.0023828	-0.002065	0.0053393	0.0087877
An18g05030	0.0039233	-0.0092524	0.0043664	-0.007183	0.0010362	0.0038921	-0.011307	-0.0071524	-0.017176	-0.0064899
An18g05020.Aspni5_212102	0.0016026	-0.0027615	-4.5884e-05	0.004579	-0.0044719	-0.0026239	-0.008919	-0.0034669	-0.0040647	-0.0014973
An18g05010	-0.0065346	-0.0050541	0.010302	0.0020258	-0.0019517	0.005576	-0.0066081	0.0017513	2.7404e-05	-0.0090995
An18g05000.Aspni5_212098	-0.0072049	-0.010884	0.001707	0.00053062	-0.0023044	0.0027347	-0.0067571	0.0019373	0.0021798	-0.009435
An18g04970.Aspni5_42926	0.0022997	0.00011	-0.0020015	-0.0057126	-0.0044597	-0.0044818	-0.01352	0.008712	-0.017248	0.0062394
An18g04960.Aspni5_42925	-0.0020978	-0.0062778	-0.0062745	-0.0040577	-0.0023248	-0.00029236	-0.019291	0.011959	-0.00054096	-0.0059831
An18g04950	-0.0006515	-0.00052962	-0.00034902	0.00082403	0.0032148	-0.0024517	-0.00061849	0.0024596	-0.0031334	0.002895
An18g04930	-0.0099161	0.0056269	-0.025267	-0.013835	-0.00085073	-0.018399	-0.018252	0.013837	0.016248	-0.010432
An18g04920	0.0065261	-0.0040894	-0.0030433	0.00042761	-0.0031297	-0.008969	-0.010201	0.0018466	-0.014997	0.0028624
An18g04910.Aspni5_187784	0.013921	-0.0018236	0.0042941	0.00076083	-0.001584	-0.00077051	0.0012995	0.0070549	-0.0018721	0.00032238
An18g04900	0.014666	-0.0019219	0.0045753	-0.0012567	-0.00099143	-0.0011004	-8.5265e-05	0.0054759	-0.0014966	-0.0008065
An18g04880.Aspni5_187914	0.0057535	0.00089085	0.0025607	-0.002645	-0.001841	-0.0024119	-0.0026907	-0.0019	-0.0018894	-0.0032027
An18g04870.Aspni5_42921	0.0024398	-0.0002075	0.0041434	-0.0049851	-0.0050173	-0.0013069	-0.003132	-0.0017974	-0.0033775	-0.0013838
An18g04860	-0.0020356	-0.00090896	0.0034134	-0.0047196	-0.0045039	-0.006125	-0.012362	0.0014338	0.0083651	0.0073153
An18g04850.Aspni5_128501	-0.0015821	-0.0040957	0.0026734	-0.0052877	-0.00050021	-0.0041119	-0.0044358	0.0005934	0.0007384	-0.00042323
An18g04840.Aspni5_212096	0.00034417	0.00069131	-0.0011292	0.0045801	0.00026373	-0.0047932	0.00025957	-0.0051388	0.00072736	0.00052094
An18g04820.Aspni5_42918	0.0078405	0.0064664	0.012715	0.0053368	-0.0026251	0.0068548	-0.013872	0.019515	0.0025531	0.0028057
An18g04810.Aspni5_42917	0.014321	0.029662	-0.021183	-0.0032859	-0.022431	-0.03447	0.0027959	0.01226	0.032643	0.024794
An18g04800.Aspni5_42916	0.017167	0.014078	-0.015789	-0.0050262	-0.017581	-0.018936	0.011232	0.0065773	0.0073487	0.00049459
An18g04790.Aspni5_42914	0.0047648	-0.00072368	-0.0019536	-0.0090401	0.0022509	0.0027544	0.003094	-0.0017195	-0.0076357	-0.0024369
An18g04780.Aspni5_42913	0.0010945	0.0032619	0.0033384	0.00070837	0.00015778	-0.0027312	0.0008665	-0.0023558	0.0056109	-0.0018514
An18g04770	-0.0095978	0.010879	-0.012135	-0.016362	-0.00097675	0.0007868	0.0074272	0.012298	0.037903	-0.007266
An18g04760	0.0059712	0.00063987	0.0018615	-0.00016595	0.0040759	0.0016022	0.0058056	0.010346	0.0038173	0.0057661
An18g04750.Aspni5_187475	0.0018451	0.0015291	0.0037846	0.0024492	0.0044567	0.0015284	0.0068637	0.0065651	0.0027266	0.008413
An18g04740	0.0088403	0.0016541	0.0027971	-0.01584	0.013147	-0.00072172	-0.0036606	0.0045498	0.014482	0.0059953
An18g04730.Aspni5_212091	-0.004579	-0.0025297	-0.0010536	0.0029457	0.0073427	0.00047555	0.0036647	-0.0026347	0.0025892	0.0053566
An18g04720	-0.0037411	-0.0091855	0.0014513	-0.0044648	-0.003286	-0.0046573	-0.012889	0.00094021	0.0044871	-0.0085163
An18g04710	-0.0061721	-0.009959	-0.0054116	-0.013303	-0.0042082	0.0014472	-0.013109	0.0011202	0.0012119	0.0065698
An18g04700	0.00029111	-0.0039538	-0.0083894	0.00061546	0.0032584	0.0044368	0.0053526	0.0010956	0.0018999	0.00153
An18g04690.Aspni5_202548	-0.0005424	0.0010577	-0.00086452	0.0017742	0.0068462	0.00071643	0.0026518	0.0036535	0.0084701	0.0012925
An18g04680	0.011716	0.0066506	-0.010089	0.0033815	0.010773	0.0044123	-0.0012046	-0.0031071	0.0028556	0.0058062
An18g04670.Aspni5_212087	0.0021473	0.0034039	0.0015578	0.0030149	0.0061882	-0.00068405	0.0019466	-0.002563	0.00089794	0.002743
An18g04660.Aspni5_54192	-0.00074792	-0.00043654	0.0038938	-0.0013983	0.0046487	-0.002144	0.0028731	-0.0008158	-3.947e-05	0.0081512
An18g04650.Aspni5_56808	0.0051251	-0.0026291	0.0032754	0.0050941	-0.00088657	-0.00048244	-0.0044494	-0.0030075	-0.0017134	0.00022966
An18g04640.Aspni5_42907	0.002927	0.00085336	0.011144	-0.0014052	-0.0028099	-0.00095584	-0.0077342	-0.0014365	0.002693	-0.0012872
An18g04630.Aspni5_143793	-0.0017787	-0.020457	0.0061674	-0.00022667	-0.013005	0.0022272	-0.02562	-0.022372	0.026616	0.013969
An18g04620.Aspni5_187975	-0.0074527	-0.0076938	0.0081203	0.01042	-0.009283	0.0034469	-0.011216	-0.0047966	0.001238	-0.0033505
An18g04610.Aspni5_212077	0.00093982	0.00071256	0.0077675	0.003897	-0.0010602	-0.0019453	-0.0037082	0.00063204	-0.001454	0.0017888
An18g04600.Aspni5_212076	0.0060296	0.00018388	0.0083663	0.0030202	-0.0031096	-0.0048792	-0.0033205	-0.00051387	2.0323e-05	0.0014398
An18g04590.Aspni5_212073	0.0043155	0.0017644	0.0064284	0.0011122	-0.0045672	-0.0020263	-0.0038864	-0.0055159	-0.0040152	-0.0032601
An18g04580.Aspni5_212069	0.003652	0.0041021	0.0052489	0.0030591	-0.0019182	0.00023354	0.0052938	-0.0050916	0.004154	0.0020055
An18g04570.Aspni5_42900	0.00021162	-0.0015387	0.0061975	0.0017515	-0.0041339	-0.0018706	-0.0043558	-0.0041119	-0.003511	-1.5639e-05
An18g04560.Aspni5_126860	0.0027876	0.00068755	0.0052396	0.0027609	8.5434e-05	-0.0047162	-0.00073227	-0.0045465	0.00040481	-0.0027595
An18g04550.Aspni5_42898	-0.0067476	-0.0023295	0.0021811	0.0083868	0.00018414	-0.0010459	-0.0020372	0.0023641	0.0015296	0.0043184
An18g04540.Aspni5_187292	0.00098323	0.0045012	-0.0028928	-0.0075621	0.0025297	-0.0061693	0.0050868	-0.0066094	-0.002833	-0.0005292
An18g04530.Aspni5_49903	0.0088519	-0.0047655	-0.001697	-0.001489	0.0039072	-0.0048989	-0.005569	0.010468	-0.00046442	-0.0073813
An18g04520.Aspni5_186933	-0.0025877	-0.008926	-0.0051294	0.00086178	0.0072936	-0.0027504	-0.00043365	0.010018	-0.00074346	0.0030738
An18g04490.Aspni5_187803	-0.0024594	-0.0022879	0.00089076	-0.0011864	0.00072597	-0.0063371	-0.0089126	-0.0008084	-0.0020831	0.0037253
An18g04480.Aspni5_54187	0.0066139	0.00078698	0.0034442	0.0015766	0.00079414	-0.0012314	-0.00037762	-0.0032411	-0.0028358	0.00094891
An18g04470.Aspni5_202528	0.0017874	0.00045963	6.7302e-05	0.001046	0.0035471	-0.002415	0.0013616	-0.00397	0.0021624	0.0051872
An18g04460.Aspni5_187386	0.0075644	-0.0012906	0.0011861	0.0027204	0.0070136	0.0022277	-0.00485	0.0082276	-0.0022835	0.0015332
An18g04450.Aspni5_42890	0.0031256	0.0012798	-0.00070241	0.0013007	-0.0022181	-0.0098477	-0.011067	0.0054259	-0.0055924	-0.0012638
An18g04430	-0.0037668	0.002226	0.0081054	-0.0085739	-0.015178	-0.0029054	0.0076446	0.0012563	-0.0012917	0.01127
An18g04420.Aspni5_120259	-0.0020587	0.0045369	0.012376	-0.0040149	-0.0021773	-0.00091264	0.003439	-0.0044221	0.0025616	0.0043999
An18g04410.Aspni5_127313	-0.0055346	-0.010602	0.004064	-0.00058958	0.0035514	-0.0017423	-0.0048868	0.0022727	0.0051575	-0.00061289
An18g04400.Aspni5_212062	0.0038769	-0.002679	0.00018179	0.0021636	-0.00077945	-0.0043332	-0.0049152	0.0019181	-0.0018547	-0.0011882
An18g04390	-0.004097	-0.0029714	0.019701	-0.0073444	-0.015182	-0.0055153	-0.0038923	-0.0092932	0.01932	-0.0079767
An18g04380	-0.00048881	0.0017141	-0.004553	-0.0062543	0.0068427	0.0068213	-0.0094565	-0.0016464	0.011796	0.001701
An18g04370	-0.0038023	-0.0038778	0.0050948	-0.034943	-0.029427	0.0088854	-0.014763	0.0072914	0.030953	-0.001363
An18g04365	-0.0010248	0.0018307	0.0010046	-0.0040937	-0.01262	-0.0036666	0.0014976	0.0032521	0.0091482	0.0055871
An18g04360.Aspni5_212059	-0.00085854	0.0010227	-4.521e-05	-0.005988	-0.012263	-0.0032113	0.0018267	0.0022301	0.0079185	0.0053333
An18g04350.Aspni5_130150	0.002968	0.0030267	0.011245	0.0028873	-0.0040115	0.0017846	-0.0016385	-0.0039985	0.003996	-0.0014513
An18g04340.Aspni5_42881	0.003727	-0.00082734	-0.00029291	-0.0021065	-0.0069321	-0.0015826	-0.0037096	-0.0071636	0.0045667	-0.0030716
An18g04330.Aspni5_49896	0.0062547	0.0047466	-0.0044064	0.012142	-0.015799	-0.0031413	-0.0053386	-0.0011782	0.010771	-0.005766
An18g04320.Aspni5_187754	0.004553	0.0013501	0.0017771	-0.00096855	0.0030416	-0.0022146	0.001262	-0.00060325	0.0041618	-0.00017055
An18g04310.Aspni5_212055	0.00023361	-0.0055958	0.0015166	0.0063718	-0.007588	-0.00065612	-0.0074615	-0.0049608	-0.0079315	-0.0028567
An18g04300.Aspni5_56801	0.0010532	0.0020487	0.00079525	-0.00014499	0.0034792	-0.0033216	0.001951	0.0032024	0.0011917	-0.0017331
An18g04295	0.0075625	-0.0015154	-0.0020399	-0.0037767	0.0054677	-0.0040992	-0.0051369	0.0066931	0.0095065	-0.0059166
An18g04290.Aspni5_187777	-0.00046651	0.00075416	0.00038546	-0.0028078	0.0024769	-0.0014868	0.00060188	0.0027457	-0.0017963	0.0012991
An18g04280.Aspni5_127337	0.0041507	-0.0079165	-0.00014801	0.0038746	-0.010022	-0.0079619	0.00042239	-0.0013931	-0.0021061	-0.004182
An18g04270.Aspni5_187222	0.0072072	-0.00041121	-0.00077545	-0.0057233	-0.0031274	-0.0050672	-0.0072334	-0.0011136	-0.0056189	-0.0037658
An18g04260.Aspni5_134049	-0.003238	0.0080202	-0.020901	0.0044912	-0.0019319	0.015337	0.0075819	0.0069375	0.017393	0.0016406
An18g04250.Aspni5_137492	0.0026773	-0.00075741	-0.0012082	0.0023217	0.00080321	-0.0027104	-0.0012376	-0.00041192	0.0012543	0.002302
An18g04240.Aspni5_202514	0.0014306	0.0016731	0.0035926	0.00015319	0.00018029	-0.0030307	0.00030023	-3.8666e-05	0.00078508	0.002456
An18g04230.Aspni5_139419	0.0014856	-0.0022537	-0.002914	0.0025749	0.0023154	-0.0043924	-0.0046606	0.00045096	0.00297	0.009118
An18g04220.Aspni5_212044	-0.0058633	-0.001928	-0.00183	0.0024743	0.0024989	0.00018162	0.0022915	-0.0030556	-0.00065365	0.0057961
An18g04210.Aspni5_42867	0.0011497	0.0020048	-0.0014171	0.0022401	0.0034695	0.00032697	0.0016019	0.0021588	0.00024135	-0.0013741
An18g04200.Aspni5_187014	0.0069691	0.0086723	0.009177	-0.00068625	6.6171e-05	-0.010494	-0.00082348	-0.010202	0.0024617	-0.0073819
An18g04190.Aspni5_187103	0.005027	0.0043474	0.0095138	-0.0029295	0.0018275	-0.00044195	-0.0053225	-0.0034265	-0.0091262	-0.0016397
An18g04180.Aspni5_202504	0.0013044	-0.0033773	-0.00028615	0.0042632	-0.0031323	-0.00095983	-0.0044891	-0.0042474	-0.0062166	-0.0015661
An18g04170.Aspni5_212036	-0.0044161	-0.0033082	-0.0050579	-0.004147	0.011022	-0.0026024	0.012219	0.0023797	0.0074143	0.0033238
An18g04160.Aspni5_54174	0.006384	0.013413	0.01138	0.0065186	-0.014158	0.00074739	-0.0073795	-0.005175	-0.0042062	0.0017756
An18g04150.Aspni5_202494	0.0022228	0.0082354	0.014094	-0.0033629	-0.0039051	0.0036324	-0.0027511	-0.00028395	-0.0070503	0.00066517
An18g04140.Aspni5_42861	0.013691	0.013494	-0.0067691	0.010693	-0.0029505	0.0035005	0.0044611	0.014392	-0.0022433	0.010223
An18g04130.Aspni5_187856	0.013659	-0.010332	0.0054217	0.00094112	-0.0034808	0.016488	-0.0013636	0.011581	-0.0102	0.0082561
An18g04120.Aspni5_127581	0.011353	-0.0097151	0.0056606	-0.0053671	0.011161	0.0064164	-0.0038009	0.0016294	-0.002007	-0.0066023
An18g04110.Aspni5_42858	-0.00092448	0.0029468	0.0034616	0.001102	0.0044009	-0.0027464	-0.0016328	-0.0045183	0.00080308	0.0064558
An18g04100.Aspni5_202490	0.014655	0.01326	-0.0034286	0.0097879	0.0048496	-0.00029985	-0.00055303	0.0023482	-0.0055979	0.0018782
An18g04090.Aspni5_54172	-0.018248	-0.0019537	-0.0084184	-0.0021542	0.0021417	0.006131	-0.00036071	0.0059217	-0.00085429	-0.0011748
An18g04080.Aspni5_212021	0.0080492	-0.00017742	-0.0063126	0.0084618	-0.0053294	-0.001806	-0.0023008	-0.011692	0.0077611	-0.0088065
An18g04070.Aspni5_56792	0.0019501	-0.00014671	0.0013157	0.00044182	-0.0077118	0.0046275	0.0099641	0.0018848	0.012225	0.010201
An18g04060.Aspni5_56791	0.00040653	-0.0021884	0.0022287	0.002927	0.0033015	-0.00047388	0.0027987	0.00064344	0.0072361	-0.00092823
An18g04050	0.0045234	0.000732	0.0069863	0.0015364	-0.0037353	0.0018489	-0.00047492	0.0015973	0.0012605	-0.010673
An18g04040.Aspni5_42852	-0.0065644	-0.0035967	-0.0055177	0.0046342	0.0030103	0.0040626	-0.0048473	0.00033806	0.00073081	0.013729
An18g04030.Aspni5_54168	0.0018883	0.0030356	0.0072739	0.0019069	0.0013451	-0.0026014	0.00322	-0.0032231	-0.0019229	0.0017125
An18g04020.Aspni5_49873	0.0012317	0.002287	0.0054024	0.00052688	0.0047119	-0.0067082	0.0039085	-0.0015392	0.0023808	0.0047098
An18g04010.Aspni5_212012	-0.00053779	-0.0018206	0.0056645	0.00052783	0.00025385	-0.0028583	-0.0080392	-0.0014876	0.0026207	0.002637
An18g04000	-0.0051652	-0.005113	0.0060387	0.0023392	-0.0076119	0.0063153	-0.0073425	0.0056557	-0.0094382	-0.0022308
An18g03990.Aspni5_123334	0.010585	0.0060845	-0.012575	-0.0033822	0.014334	-0.00072594	0.0078542	-0.0040892	2.5937e-05	0.0069052
An18g03980.Aspni5_56788	0.0026062	0.0045175	0.0064911	-0.0014702	-0.0026057	-0.0031949	0.0026433	-0.0072839	0.00026656	-0.00099514
An18g03970.Aspni5_42846	0.0014669	0.00025019	0.0053815	0.00021241	-0.0029115	-0.0025773	-0.0036587	-0.0010033	-0.0018138	-0.0014072
An18g03960.Aspni5_54165	0.0016945	-0.001354	0.0072079	0.0039036	-0.002711	-0.005675	0.0031081	-0.0017688	-0.00013536	-0.001277
An18g03950.Aspni5_42844	0.0025341	0.0011534	0.0072689	0.0034656	-0.0040588	-0.0022105	-0.00054785	0.0016445	0.0039921	0.0014142
An18g03940	-0.00014762	-0.0043355	0.0013633	-0.0069411	0.012063	-2.7439e-05	0.0064398	0.011346	0.019852	5.0637e-05
An18g03930.Aspni5_187023	0.0014719	-0.0027894	-0.0010662	0.00060158	0.0040097	0.0011457	0.003631	0.0026718	0.0044889	0.00080631
An18g03920.Aspni5_187424	0.00024549	-0.0017605	0.0010041	-0.0027534	-0.0079462	0.0018579	-0.0042324	-0.0048249	-0.0015274	-0.0023472
An18g03910	0.0057999	0.00097612	0.0083706	0.0061859	-0.0022023	-0.0038385	-0.0029575	0.0008266	0.00097275	0.00065389
An18g03900.Aspni5_49866	0.002889	-0.0019052	-0.00012048	-0.0063458	0.00071696	-0.0030932	-0.014084	-0.0038889	-0.0032204	0.0010836
An18g03890	0.010374	-0.00034042	0.007521	0.0013503	0.0030476	-0.0032939	-0.0035213	-0.008555	0.0048132	-0.0043717
An18g03880.Aspni5_126214	-0.003197	-0.0092116	0.01167	0.0073792	0.0034079	-0.0041439	-0.005959	-0.0061691	-0.0044052	-0.0051979
An18g03870.Aspni5_212003	-0.0048245	-0.0029674	-0.0073593	0.0024477	0.0092207	0.0032035	0.0092131	-0.0028923	0.0049046	0.0023453
An18g03860	-0.01289	0.00013256	-0.0050268	-0.018939	0.0049361	0.004643	-0.012069	0.00059989	-0.00029487	0.0028013
An18g03850	-0.0016001	0.002759	0.0012789	-0.0022094	0.0035962	0.0042394	-0.0012029	0.0022956	0.0006327	-0.0019685
An18g03830.Aspni5_187242	-0.0078483	-0.0063566	0.0059321	0.0012272	0.0035025	0.0068882	0.0021738	0.0045665	-0.0057439	0.0028181
An18g03820.Aspni5_202464	-0.0070579	-0.0032666	0.00053176	0.0022531	0.0074313	0.0031104	0.0065966	0.0044895	0.0067714	0.0039992
An18g03810.Aspni5_202461	0.00097722	-0.0027757	0.0017454	0.0068883	-0.0038995	-0.0018677	-0.0049811	-0.0055498	-0.0033971	-0.001006
An18g03800.Aspni5_187366	0.0050356	0.0055448	0.0065342	-0.0023092	-0.0035274	-0.001792	-0.0054392	-0.0054913	-0.0051491	0.0016074
An18g03790	0.0020394	0.0010751	0.0060125	0.0018002	0.0014823	-0.0033939	0.0030845	-0.0029907	0.0035527	0.0010729
An18g03780.Aspni5_187339	7.8306e-05	0.0027798	0.00726	0.0027559	0.0022509	-0.0019598	0.00092306	-0.0060686	0.0038203	0.0026819
An18g03770.Aspni5_211990	-0.0035156	0.002008	0.00079588	0.0037832	0.0079026	0.00023883	0.0050497	-0.00057783	0.011604	0.0069708
An18g03760.Aspni5_42831	0.00049558	0.0038379	0.0012346	0.0043368	0.0047688	-0.00074538	0.0011851	0.0022488	0.003296	0.0046864
An18g03740.Aspni5_211983	-0.00079612	-0.00075834	0.0036265	-0.00027525	0.00018244	-0.0053371	0.00033882	0.0019721	0.0059024	-0.0033853
An18g03730.Aspni5_54157	-0.0023788	0.0025041	0.0073081	0.0022484	-0.011722	0.0054688	0.0066582	-0.0096973	0.011335	0.00068557
An18g03720	-0.0025253	-0.0040751	-0.0077615	-0.0021531	0.010095	-0.009186	0.0076442	0.0051982	0.0062092	0.0065654
An18g03710.Aspni5_42828	0.0038914	0.0057986	-0.0009531	-0.0054521	0.00084447	-0.014312	-0.0072914	0.0068318	0.0036403	-0.0029286
An18g03700.Aspni5_54156	-0.0054601	-0.00085391	-0.0034381	0.0010999	0.0067549	-0.0023524	0.011143	-0.0033432	0.003273	0.0097202
An18g03690	0.020189	-0.00088649	0.0074771	-0.010003	0.01095	0.0085919	0.0060364	0.010357	-0.0063718	-0.0084017
An18g03680	0.029377	0.0069743	0.0041504	-0.020887	0.002552	0.022225	0.0048819	-0.0092424	0.012475	-0.0037855
An18g03670.Aspni5_42826	-0.0022122	9.2663e-05	0.011949	0.0013237	-0.008911	-0.0023585	-0.0014519	-0.0040951	0.0027774	0.0018809
An18g03660.Aspni5_42825	0.00010333	0.0058311	0.0057836	0.004242	0.0023073	-0.0021056	0.0052481	-0.0093223	0.0050108	0.0036741
An18g03650	0.019311	0.0030057	-0.036692	0.0010298	0.029047	-0.0020626	-0.018654	-0.01938	0.00097043	0.013958
An18g03640.Aspni5_211979	0.0033935	0.0053995	-0.0083321	-0.0099981	0.0057398	-0.00098542	-0.0035406	0.0027678	-0.010284	0.0043701
An18g03630.Aspni5_135136	0.00071312	0.0029486	-0.0093724	-0.0021223	0.0077447	0.0039518	0.0073355	0.0019019	-0.00080682	0.00022767
An18g03620.Aspni5_42823	0.015523	-0.003846	-0.003109	-0.0039811	-0.00048327	-0.010123	-0.0044639	-0.0011728	-0.0084355	-0.0044786
An18g03610.Aspni5_131259	-0.0051469	-0.0027876	0.0046481	0.0082284	0.0043	-0.00057372	0.001189	-0.0058628	0.005244	0.010303
An18g03600.Aspni5_49859	0.01789	-0.0004192	0.0015513	0.0038071	0.011303	0.01688	0.0076215	-0.0061907	-0.0013431	-0.0093587
An18g03590.Aspni5_124341	0.019476	0.0015476	0.0016469	-0.0087087	0.020244	0.014245	0.0067292	0.0027899	0.00075586	-0.018784
An18g03580.Aspni5_211974	-0.0040219	0.00033155	0.0027256	-0.0032719	0.0012654	0.00052503	9.6604e-08	-0.0032589	-0.0029736	0.0071413
An18g03570.Aspni5_56782	0.00014854	0.029736	0.0039419	-0.0018268	-0.019045	0.032089	-0.0075649	0.0016681	-0.0079479	0.023481
An18g03560	0.00040069	0.017045	-0.011966	-0.01668	-0.014116	0.035126	-0.015016	-0.0044873	-0.0080734	0.0079536
An18g03550.Aspni5_187553	0.0042805	0.0059976	-0.00036384	0.0040386	-0.014937	0.01896	-0.010132	-0.002769	0.0050256	0.012371
An18g03540.Aspni5_187254	0.0036657	0.0033599	0.0062801	-0.0061635	0.0046035	0.0089764	0.0060899	0.0011477	-0.000167	0.0054394
An18g03530.Aspni5_211968	0.0059983	0.008084	0.003145	0.0018511	0.0010662	-0.00068141	0.0058704	0.0011192	0.0016381	0.0025981
An18g03490.Aspni5_202429	0.0020081	0.0028467	0.0026578	-0.0033492	0.0013464	0.00026731	0.0044976	-0.001024	0.0026428	-0.002441
An18g03480.Aspni5_187304	-0.00057752	-0.0025485	0.009864	0.0036257	-0.0059652	-0.00020095	-0.0037339	-0.0084826	-0.00029083	0.00053307
An18g03470.Aspni5_186946	0.0014724	-0.0045474	0.0066461	0.00098819	-0.0025333	-0.0055448	-0.01014	-0.0060421	-0.0030692	-0.0031867
An18g03460.Aspni5_128404	0.0032865	-0.002001	0.0021079	-0.0033886	-0.00071634	-0.0027308	-0.0086688	-0.00029273	-4.1051e-05	-0.0016662
An18g03450.Aspni5_211963	-0.0052214	-0.00085057	-0.00022972	-0.0056156	0.011802	-0.0027943	4.2055e-05	0.00045071	-0.00089019	0.010239
An18g03440	0.0075482	-0.0044249	0.0013697	-0.018396	0.011447	0.019065	0.0040814	-0.0019711	0.0082976	0.019
An18g03430.Aspni5_54150	-0.0013926	0.0040296	-0.0043963	0.0014637	0.00878	-0.0014213	0.0054924	-0.0011573	0.0040996	0.003755
An18g03420	-0.0045108	-0.0006378	-0.012587	-0.015753	0.0097705	0.00072118	-0.0096305	0.0017973	-0.0038382	0.0047757
An18g03410	0.001681	-0.00056536	-0.0067722	-0.0018471	0.0070482	-0.0014474	0.0017916	0.001933	0.001114	0.0025779
An18g03405	-0.0021794	0.0054592	0.0029783	-0.0029268	0.0012275	-0.0035154	-0.0079111	0.0053583	0.0065194	-0.0044406
An18g03400	0.0026578	0.0008128	-0.0044469	-0.004327	0.0086479	0.0001486	-0.0086422	0.0087785	0.0034014	0.0024087
An18g03390	0.012367	-0.00012357	-0.002776	-0.0078827	0.0077384	-0.0045267	-0.022808	0.00137	0.0059579	-0.0069742
An18g03380.Aspni5_42809	0.028114	0.014349	-0.010127	-0.012684	-0.0018175	-1.7716e-05	0.0051148	0.0068411	-0.0067698	-0.0070944
An18g03370	0.010464	0.0066695	0.0075889	-0.0021487	-0.0040557	-0.0035323	-0.0034654	-0.00012358	-0.0021144	-0.0070881
An18g03360.Aspni5_42808	0.0089142	0.05243	-0.0038077	-0.0074563	-0.0076693	0.0058935	0.0036959	0.0070643	0.0118	-0.018271
An18g03350.Aspni5_42807	0.0050406	0.0029714	0.0062603	0.0013849	-0.00057529	-0.0041826	-0.0045138	0.0030489	-0.0005734	0.00069502
An18g03340	0.0039764	0.0036697	0.0091912	-0.0087951	0.0006253	0.00015892	-0.0064923	-0.0021832	0.0020597	0.0012419
An18g03335.Aspni5_119505	0.001322	0.00030271	0.0022939	0.0018345	0.0035781	-0.0058485	-0.0027801	0.0021118	0.0017569	0.0026119
An18g03330.Aspni5_42805	0.0022282	0.0012584	-0.010077	-0.0066052	0.011404	-0.00050787	-0.002594	-0.0008004	-0.0096348	0.0047343
An18g03320.Aspni5_211957	0.0019769	0.0035317	-0.0055555	-0.0030798	0.0080379	-0.0022192	-0.00062742	0.0013123	-0.0063961	0.0051949
An18g03310.Aspni5_202416	0.00075267	-0.0024102	0.00039426	0.0066417	-0.002035	-0.0025936	-0.0043468	-0.0053447	-0.0027138	0.0010288
An18g03300.Aspni5_211951	0.0011608	-0.0016853	0.0017046	0.0048822	0.0014832	-0.0028224	-0.0034564	-0.003278	0.0012392	0.0028625
An18g03290.Aspni5_187248	0.0031283	0.00062387	0.00363	0.0021661	-0.0021855	-0.0018705	-0.004848	-0.0016074	-0.0031689	0.00098605
An18g03280.Aspni5_42800	0.0012727	0.0045246	0.004045	0.0063119	-0.0098835	0.0058376	-0.0065528	0.0023421	-0.0050008	0.0024934
An18g03270.Aspni5_42799	0.0087684	-0.00059689	-0.0050169	7.5806e-05	-0.0024512	-0.0046439	-0.0066779	0.011509	-0.0018154	0.007871
An18g03260	0.0082748	0.0037117	-0.0069451	-0.019557	0.01961	0.0064466	-0.017637	-0.0067551	0.010303	0.0017048
An18g03250.Aspni5_211948	0.00092015	0.0036787	-0.0043208	-0.00062496	0.010601	-0.0021407	0.0057605	-0.00076664	0.0009763	0.0057497
An18g03240.Aspni5_143698	0.0049038	-0.0031151	0.0018692	-0.0022451	-0.0026734	-0.0027398	-0.0082291	-0.0017641	-0.0049925	-0.0022918
An18g03230.Aspni5_54145	-0.002357	-0.0025116	-0.00071286	0.0030551	0.0021812	-0.0026563	-0.0013893	-0.0033722	0.0017185	0.0071881
An18g03220.Aspni5_211941	-0.00099407	0.0012205	0.0011638	0.0060988	0.0040264	0.0023744	-0.0033184	-0.0016097	0.0015305	0.011858
An18g03210.Aspni5_56776	0.0059726	0.005421	0.0058135	-0.0080551	-0.0074111	-0.0033917	-0.0016525	-0.01117	-0.0034973	-0.0034411
An18g03200.Aspni5_56775	0.00086231	0.0013534	0.0072825	0.0029559	-0.0019178	-0.00034192	-0.00098506	-0.0076976	-0.0019011	0.0031835
An18g03190.Aspni5_187609	0.0081368	0.0014089	-0.001526	0.0036689	0.0026834	-0.0041323	-0.0049414	0.00062532	-0.0038953	-0.0026587
An18g03180.Aspni5_42792	0.0032334	-0.0012186	0.0013136	-0.0011179	0.0025081	-0.0036571	-0.00082671	0.00065007	-0.00062402	0.00059441
An18g03170.Aspni5_54141	0.0058259	0.0096588	0.003306	-0.00036549	0.0014914	0.00015277	-0.0015846	-0.0026577	-0.0028648	-0.0043771
An18g03160	0.0027616	-0.0034739	-0.0032136	-0.0092545	0.0045868	-0.0019535	-0.0061249	-0.0014394	0.0047427	-0.010384
An18g03150.Aspni5_54140	0.0044101	0.0045189	0.0047077	0.0026232	0.00011583	-0.00068352	0.0031871	-0.00091978	0.0029416	0.0038192
An18g03140	0.0035284	-0.01083	-0.0033643	-0.018206	0.004722	-0.012233	-0.0063508	-0.0033999	0.02514	-0.0030944
An18g03130.Aspni5_211926	0.0027373	0.0002498	0.0086076	0.0031269	-0.0041306	-0.0023532	-0.0055536	-0.006446	0.00015261	0.0023719
An18g03120	0.00070997	-0.0011911	-0.00032519	0.0022454	0.0050493	-0.005726	0.0016044	-0.0016939	0.0039163	0.007105
An18g03110.Aspni5_42787	-0.0025117	-0.0022214	0.0017196	0.005501	0.0023192	-0.002569	0.0029404	-0.00048002	0.0053418	0.0044617
An18g03100.Aspni5_188051	2.6786e-05	-0.00086865	0.0072592	0.00116	-0.0078976	-0.003455	-0.0042543	-0.0032555	-0.00049397	0.00092765
An18g03090.Aspni5_141582	0.0015187	-0.0019232	0.0081316	-0.00033269	-0.0026542	-0.0011522	-0.0030941	-0.0042035	-0.0019192	-0.0023561
An18g03080.Aspni5_42784	0.007651	-0.020085	0.019965	-0.014305	-0.020673	-0.0095757	0.010721	-0.01247	-0.0041428	0.019079
An18g03070.Aspni5_123518	0.0040972	0.0011642	0.006119	-0.0021849	0.00096193	0.00054464	-0.0005765	-0.004348	0.00071914	-0.002383
An18g03060.Aspni5_187258	0.0039225	-0.0025626	0.0015127	0.0051412	0.00025738	-0.0030933	-0.0045504	-0.0062348	0.0012537	-0.0011019
An18g03050	-0.0038593	-0.010992	-0.002064	-0.012798	0.0080658	0.0097796	-0.0070684	0.0024291	-0.0051831	-0.0054313
An18g03040.Aspni5_211917	0.0083381	0.0085673	0.0058868	-0.0061565	0.0012651	-0.0041662	0.0035429	-0.002166	0.00024863	-0.002678
An18g03030.Aspni5_42780	0.004083	0.002434	0.004851	0.0020187	0.00070741	-0.005236	-0.0062529	0.002733	0.0012449	0.00012187
An18g03020.Aspni5_187714	0.0047236	-0.00041556	0.0067333	0.0010619	-0.0026089	-0.0024025	-0.0017575	0.00021522	-0.00063046	-0.0037218
An18g03010.Aspni5_42779	0.00077179	0.0020351	0.0048116	0.0019098	-0.00031667	-0.0013219	-0.0004899	-0.0040512	-0.0023007	0.0012695
An18g03000.Aspni5_187573	0.0049244	-0.0015522	0.0024828	0.0046418	0.00067047	-0.0043854	-0.0055298	-0.0022887	0.0014072	0.002746
An18g02990.Aspni5_211915	-0.0020328	-0.0059687	-0.00080071	0.00052676	-0.001726	-0.003269	-0.0070573	-0.0014799	-0.0037203	0.0022986
An18g02980.Aspni5_56770	-0.0023906	0.0093931	0.0089631	-0.0034554	0.0053214	0.0019582	0.0042189	-0.0015425	0.00094226	0.0083378
An18g02970.Aspni5_211909	-0.0048876	-0.0011791	0.0010685	-0.0034054	0.0033697	0.0052453	0.0050401	-0.0042163	0.00017989	0.0041371
An18g02960.Aspni5_49836	0.0034603	-0.0044416	-0.00036673	-0.011294	-0.0075228	-0.004986	-0.0087856	-0.0089535	-0.0010768	0.0041862
An18g02950.Aspni5_42773	0.01566	-0.0033743	-9.5949e-05	-0.001082	0.011575	-0.0057139	-0.0026807	0.0029701	0.0029749	-0.0013031
An18g02940.Aspni5_186897	-0.0004724	0.00023134	0.0036918	0.0018037	0.006711	-0.0020679	0.0017825	-0.001117	0.0082028	0.0045256
An18g02930	0.00065729	-0.00044768	0.00084895	0.00054102	0.00046807	0.0016569	0.0024909	0.0016085	0.00091001	0.00063952
An18g02920	0.0039316	-0.0028914	-0.0014027	0.0017643	-0.0044256	-0.0040182	-0.013784	0.015035	0.01064	0.00031492
An18g02910	0.0062717	0.00019206	-0.00055063	-0.0049352	0.0050471	0.0024498	-0.0090778	-0.001455	-0.0034716	0.00039276
An18g02900.Aspni5_211906	0.0017012	0.0047069	0.00096939	0.00014057	0.0051047	0.001686	0.00045297	-0.0045765	-0.005708	0.0028421
An18g02890.Aspni5_211901	-0.0019151	-0.0010103	-0.0029409	-0.0012613	0.0046337	-0.00069612	-0.001428	-0.0039494	-0.0018947	0.0075607
An18g02880	-0.0030616	-0.0050486	-0.013734	-0.022755	0.0045806	0.024978	0.0040063	-0.017661	0.0029353	0.011601
An18g02870	0.0043443	0.0026549	-0.011651	-0.016017	0.012565	0.0043794	-0.00090034	-0.0042699	-0.0018112	0.0032461
An18g02850	-0.0012279	-0.0030676	-0.0033638	-0.0015045	0.0014357	-0.0042888	-0.0020199	-0.0010193	-0.00083694	0.0061849
An18g02840	0.0049482	0.00015319	0.0052477	-0.003528	0.0074564	-0.0070589	-0.0083114	0.0046158	0.010471	-0.0093336
An18g02830	0.00053792	-0.00049373	0.00019636	0.0030904	0.0032426	0.0030079	0.0020364	-0.0027225	-0.0023815	-0.0032802
An18g02820.Aspni5_137779	0.0076995	0.0010872	-0.00091831	-0.0027258	-0.00049477	-0.0032998	-0.0070431	-0.0016699	-0.0042387	-0.0068659
An18g02810	0.0017412	0.0013297	-0.00044075	0.0014392	-0.0018064	-0.0030458	0.0024724	0.0016929	-7.0593e-05	0.0034502
An18g02800.Aspni5_54129	0.0082924	-0.0037708	-0.0011434	-0.0079845	0.0028127	0.00084783	-0.0098832	-0.006461	0.00066909	0.0005967
An18g02790.Aspni5_42764	0.0094026	-0.0041913	0.0024223	0.0011291	-0.0027985	-0.00044737	-0.0080456	-0.003771	0.00084741	-0.00055726
An18g02780.Aspni5_42762	0.01931	0.00358	-7.4192e-06	-0.010923	0.0037627	-0.0053177	0.014961	0.0071511	0.0029951	0.0014091
An18g02770.Aspni5_54128	0.0037824	0.0064895	0.00428	-0.013407	-0.003018	-0.0061192	0.0099145	0.0066384	0.0077718	0.0038493
An18g02760.Aspni5_187731	0.003727	0.00095297	-0.0014308	-0.0071061	-0.007229	-0.0013465	0.0086461	0.0046263	0.014349	-0.0033905
An18g02752.Aspni5_42759	0.0050391	0.010921	0.0017392	-0.0060647	-0.015446	-0.0031648	0.00010188	-0.0017408	0.0030199	0.0166
An18g02750.Aspni5_54127	0.0039356	0.0076591	0.001966	-0.0018816	-0.015965	0.0022407	-0.0081142	-0.0017959	0.0018219	0.010006
An18g02740.Aspni5_54126	0.0095135	0.0084797	0.0047698	0.004396	-0.011025	0.005533	-0.0014268	0.0015769	0.0052502	0.0062601
An18g02730.Aspni5_54125	0.013844	0.021018	-0.001255	-0.004666	-0.016029	0.008379	-0.0066322	0.0074503	0.0059978	0.0078901
An18g02720.Aspni5_54124	0.0065278	0.0089786	-0.0027524	-0.0034235	-0.018626	0.0038345	-0.00015661	0.001035	0.0029953	0.010652
An18g02710.Aspni5_54123	0.014138	0.022606	0.0074807	0.0046211	-0.010501	0.0013366	-0.0040777	0.0038732	0.013452	0.01518
An18g02700.Aspni5_188056	0.0086619	0.020747	0.0065684	0.004064	-0.013257	-0.002196	-0.0067459	0.002805	0.005842	0.020363
An18g02690.Aspni5_131352	0.0052824	0.018885	0.014459	0.0094274	-0.010959	0.0027831	-0.0064781	0.0026031	0.0063959	0.020064
An18g02680.Aspni5_140623	0.0044793	0.0084928	0.0066815	-0.0013264	-0.0064222	0.00050946	0.0020064	0.0028051	0.0029866	0.0083574
An18g02670	0.015415	0.0054855	0.0030769	-0.0063265	0.00069046	0.0052966	0.016518	0.0097566	0.02788	-0.0043413
An18g02660	0.014209	0.0031383	-0.0088006	-0.0020399	0.007181	0.0010309	0.014024	0.011735	0.0068727	0.0023136
An18g02650.Aspni5_202333	-0.011818	-0.0092269	0.011006	-0.0085354	-0.0061014	-0.0064561	-0.00074174	0.0051567	0.0025332	-0.0024202
An18g02640	-0.0095866	-0.0077309	0.016077	-0.024881	0.0148	-0.01528	0.0062393	0.0031417	0.0015319	-0.014404
An18g02620.Aspni5_128952	0.011571	-0.0019564	-0.018492	0.00029329	-0.025512	0.0086667	0.0026587	0.021245	0.016929	0.0013929
An18g02610	0.013342	0.0018216	-0.012124	0.0044427	-0.010873	0.0041119	0.0072711	0.018022	0.020474	-0.001823
An18g02600.Aspni5_42737	0.019189	0.012069	-0.0014798	0.0047932	0.0080053	0.0036535	0.0012002	0.013523	0.0024834	0.0075314
An18g02590.Aspni5_42736	0.010821	-0.0076462	0.010836	0.0043615	0.0030894	0.0036662	-0.0022797	0.012945	0.0047682	-0.0074707
An18g02580.Aspni5_42735	0.011107	-0.0032822	0.0008779	-0.015471	0.00078711	-0.0087122	-0.011094	0.0056034	0.017619	-0.0065673
An18g02560.Aspni5_42734	0.011925	0.00010043	0.0044066	-0.0091389	-0.0047336	-0.01147	-0.0022288	0.0082359	0.0074033	-0.0052796
An18g02550.Aspni5_42733	-3.1203e-05	-0.015064	0.0024421	0.010367	-0.013041	-0.0039305	-0.0069341	-0.0034357	-0.002585	0.010773
An18g02540	-0.00021837	0.00089614	0.00086904	0.0010035	-0.0021898	-0.00016662	0.00071679	0.00060208	0.0012602	-0.0018627
An18g02530	0.0058585	-0.0072321	0.0047725	-0.008221	-0.0012579	-0.011367	-0.0029792	0.0040108	0.0022028	0.0062707
An18g02520.Aspni5_187460	0.0049938	-0.0013149	0.0046921	0.0018337	-0.0022037	-0.0046901	-0.0043546	-0.0010983	0.0011019	-0.0020106
An18g02510.Aspni5_54114	0.00089704	0.0070696	-0.00098982	0.0058416	0.0033795	-0.0021291	0.0032919	0.0037404	0.0082226	0.0023564
An18g02500	0.0030665	0.0044534	0.0051643	0.003274	0.0050251	-0.0015	-0.0038313	0.0026046	0.01014	0.0013658
An18g02490.Aspni5_186956	0.00016473	0.0053883	0.0045484	0.0036633	0.0032519	0.00043529	0.0025005	-0.0034566	0.0071927	0.0031414
An18g02480.Aspni5_49828	0.0010407	0.00038886	0.0052902	0.0019412	-0.00025601	-0.00038023	-0.0027795	-0.0014525	-0.0003966	0.0033368
An18g02470.Aspni5_42728	0.0019774	0.0027857	0.0050959	-0.00069645	-0.0033781	0.0007557	-0.0033912	-0.0021742	2.469e-05	0.00036932
An18g02460.Aspni5_42727	0.0014868	-0.0019343	0.0038528	0.00062493	-0.0013981	-0.0011326	-0.0042883	0.00044578	-0.0047588	0.00092411
An18g02440.Aspni5_42726	0.0047804	0.0030666	0.0070005	0.0019377	-0.0029843	-0.0024509	-0.0018818	-0.0031063	0.00015821	-0.0024398
An18g02430	-0.0035723	0.015569	0.00012235	-0.0070475	0.0065105	-0.0027496	0.0030012	0.019375	0.014419	-0.0025787
An18g02420	0.0011228	-0.00054389	0.0025742	-0.002369	0.00081446	0.0037308	0.002602	0.00057161	0.0042954	0.0042063
An18g02410.Aspni5_187336	0.0083798	0.0064893	0.0015756	0.00065724	0.0058233	-0.0043929	-0.0008759	-0.00030796	0.0051346	0.0010969
An18g02400.Aspni5_51653	0.0006581	0.0017299	0.0058287	0.0020664	0.0023526	-0.00031957	0.0025827	-0.0034355	0.0050827	-0.00062302
An18g02390	-0.0040809	0.0024576	0.0039231	-0.01143	-0.010241	-0.0052388	0.0041552	0.0016455	-0.0044974	0.014553
An18g02380.Aspni5_42722	0.016986	0.0061653	-0.0024648	0.0042979	-0.00059994	-0.0034905	0.0018941	-0.0030508	-0.0030699	-0.003516
An18g02370.Aspni5_187847	0.0037875	-0.00021656	0.0017113	0.0054322	0.0013641	-0.0050767	-0.0049922	0.0019059	-0.0013178	-0.00042929
An18g02360.Aspni5_42720	0.00072114	0.0014461	0.0012081	0.0055148	-0.0055734	0.0035287	-0.0040154	0.00058915	0.0056531	-0.0041889
An18g02340	0.011759	7.5729e-05	0.0042563	0.0060308	-0.0032256	-0.0073257	-0.0034459	0.0039725	-0.0021211	-0.0083695
An18g02330	0.011333	0.00064827	0.0042393	0.0070408	-0.0025162	-0.0078634	-0.0033814	0.004428	-0.0014018	-0.0082005
An18g02320.Aspni5_42716	0.013275	-0.0021927	0.019288	0.0016357	-0.014778	0.0013397	-0.018883	0.0087216	0.0028103	-0.0063038
An18g02310	0.0012889	0.0053737	-0.010437	-0.0020953	0.011254	-0.0017891	0.0077949	-0.0025687	0.0021847	0.001766
An18g02305.Aspni5_211856	0.00095547	0.0045959	-0.012173	-0.0013637	0.0082696	-0.0014147	0.0065539	-0.00095183	-0.0011	0.0018386
An18g02300	0.003021	0.001611	-0.0041734	-0.006351	0.008085	0.007044	-0.010338	-0.0023506	0.0075951	-0.0081971
An18g02290	0.00079177	0.00355	-0.0074796	-0.0076555	-0.0044155	-0.0056897	-0.01915	0.005241	-0.0055839	-0.0010428
An18g02280.Aspni5_119238	0.0052736	0.0093813	0.0060527	-0.0021843	-0.0087664	0.0011915	-0.0040756	0.002624	0.0051895	-0.00039472
An18g02270	0.0045072	0.0029549	0.0067826	0.0043511	-0.0034172	-0.0016685	-0.0022884	0.00053261	6.1052e-05	-0.0016004
An18g02260	0.0058891	0.0034201	0.010224	-7.9924e-05	-0.0020773	-0.00064333	-0.00065652	-0.00017002	0.0014723	-0.0029589
An18g02250.Aspni5_186950	0.0066153	0.0044073	-0.0040071	0.0023901	0.0022199	-0.0084793	-0.011059	-0.0051559	0.0045076	0.0027024
An18g02240.Aspni5_202315	0.00077976	0.0060075	0.0053448	-0.0026198	0.0025828	-0.00082656	-0.0027328	0.0024382	-8.4232e-05	0.0038933
An18g02230.Aspni5_120052	-0.00030614	-0.0020723	-0.0034159	0.0018699	0.0047754	-0.0050642	-0.0041287	-8.5687e-05	0.0035439	0.008889
An18g02220.Aspni5_127828	0.0069102	0.0024052	0.0070043	0.0017002	-0.0030877	-0.0047566	-0.0047191	-0.00029655	0.00030869	-0.0050221
An18g02210.Aspni5_54109	0.0025011	0.00022331	0.0052413	-0.0012259	-0.0015907	-0.0013632	-0.00064636	-0.0035796	-0.0023373	-0.0014367
An18g02200.Aspni5_124139	0.0024027	-0.0044161	0.0026098	0.0015693	0.00076742	-0.0040704	-0.00040852	-0.00077824	0.00091165	-0.0035915
An18g02190.Aspni5_54108	0.0014595	-0.001218	-0.0027166	0.0050095	0.0049909	0.003774	0.0034703	-0.00024308	0.006339	-0.0017328
An18g02180	-0.002466	-0.0013065	-0.041115	-0.017081	0.019566	0.0010409	-0.015775	-0.0018398	0.0032824	0.0084609
An18g02170.Aspni5_211845	-0.00043971	0.001123	-0.0013017	0.00059244	0.0041622	0.0022401	0.0053884	-0.00042578	0.0039999	0.0042162
An18g02160	0.0027411	0.00038938	-0.0087509	-0.015391	0.0068745	0.0011948	-0.019001	0.0015278	0.0025294	-0.0082476
An18g02150.Aspni5_54106	0.0039261	0.0032894	0.00066969	0.00066199	0.0039764	5.5341e-05	-0.00024218	0.0027881	0.0007835	-0.0027734
An18g02140.Aspni5_211840	0.0031982	-0.001868	0.0029198	0.0025282	-0.0023588	8.204e-05	9.8593e-05	-0.0010848	-0.0033356	-0.0016832
An18g02130.Aspni5_202301	0.0015989	-0.00068259	0.004455	0.0017534	-0.00069415	-0.0011826	-0.0038687	-0.0017092	0.0014867	0.0028617
An18g02120	0.0061164	-0.0025163	-0.0039407	0.0019808	0.0044602	-0.0087266	-0.0018196	0.0060812	0.0016118	-0.00089675
An18g02110.Aspni5_187256	0.0053705	-0.0011504	-0.0035317	0.0050987	0.0046813	-0.009224	0.00038397	0.005692	0.0028149	-0.00017864
An18g02100	0.0037945	-0.0041392	-0.011903	-0.0021337	0.0095545	-0.0098384	-0.0099333	0.0042013	0.0051056	-0.0016936
An18g02090.Aspni5_54102	0.00012472	0.001661	0.0050498	-4.3073e-06	-0.00083059	0.00084272	0.0018486	-0.00094749	0.0051174	0.00092519
An18g02080	-0.00010024	-0.0049507	0.0031176	-0.011689	-0.0021796	0.0074691	-0.0095323	-0.00050912	0.0099214	-0.010483
An18g02070	-0.00016177	-0.00058558	-0.0027452	-0.002507	0.0084955	0.0021973	-0.0059377	0.0035815	0.0063709	0.00040523
An18g02060.Aspni5_211829	-0.0049414	-8.2791e-05	0.001174	0.0048984	0.0043084	-0.00050907	0.003217	-0.00025819	0.0046574	0.0041758
An18g02050.Aspni5_187240	0.0060096	-0.0013889	0.0023931	0.0010033	-0.0068723	0.001273	-0.00065659	-0.0040308	-0.0055475	-0.0040377
An18g02040	0.01164	-0.0054976	-0.0050166	-0.0079167	0.003707	0.003295	-0.016456	-0.0024512	0.016412	0.01151
An18g02030.Aspni5_42698	0.0031118	-0.0033707	0.0026679	-0.0011313	-0.0038523	0.0015028	-0.007415	0.00084036	-0.0079078	-0.0027379
An18g02020.Aspni5_211828	-0.0057778	0.0010646	-0.0064352	0.0021368	-0.008512	0.0073935	0.0014253	-0.0036055	0.01081	-0.0064144
An18g02010.Aspni5_202289	-0.00045653	-0.0021522	0.007604	0.0033971	-0.0023673	-0.00079868	-0.0040141	-0.0034664	0.0014178	-0.00097704
An18g02000.Aspni5_42695	-0.0056826	-0.011444	0.0077825	0.0033904	0.00082291	0.00076122	-0.011577	0.0048286	0.0033581	-0.013238
An18g01990.Aspni5_187470	0.008262	0.0020046	0.0084383	0.001701	0.00083766	-0.0034585	-0.0016662	-0.0069023	-0.0015673	-0.0068101
An18g01980.Aspni5_49811	0.0015202	-0.0016208	-0.0033082	0.001106	0.0037281	-0.0042174	-0.0010063	-0.00065216	0.0041958	0.009833
An18g01970.Aspni5_49810	0.0014492	-0.0020516	0.00085251	0.0024046	-0.0013592	-0.0036025	-0.0021064	-0.0032651	-0.0035685	0.0023185
An18g01960.Aspni5_188006	0.0030053	0.007749	0.011986	-0.0035669	-0.0020933	6.9126e-05	-0.0029988	-0.0006345	-0.0037918	0.0011701
An18g01950.Aspni5_186977	-0.001116	0.0066	-0.0047665	-0.0023427	-0.0011165	-0.0067872	-0.003788	-0.0014441	0.010899	-0.0057345
An18g01940	0.0025298	-0.0020019	-0.0096216	0.00257	0.0069918	-0.0016529	-0.0078596	0.0019479	-0.00076134	-0.00041752
An18g01930.Aspni5_42689	0.016079	0.0014672	-0.00084397	-0.0036746	0.0019366	-0.0047127	-0.0026949	0.0082876	0.0011115	-0.010394
An18g01920	0.0051564	-0.0050617	-0.00036005	-0.0020883	-0.0069624	-0.0014929	-0.0084422	0.0109	-0.010699	-0.0079272
An18g01910.Aspni5_134478	0.0041404	-0.005091	-0.0020786	-0.0028173	-0.0048616	-0.0021133	-0.0082879	0.013006	-0.010883	-0.0087946
An18g01900	0.015688	-0.012435	-0.0084603	-0.013526	0.013691	-0.014247	-0.0059309	0.0048997	0.00076024	0.0020143
An18g01890.Aspni5_54098	0.011405	-0.015422	-0.01626	0.0068758	0.012276	-0.016345	0.0042552	-0.0074527	-0.0085059	0.0061904
An18g01880	0.0049376	-0.0025927	0.0011646	-0.0014043	0.0023325	-0.00081142	-0.0053461	0.0047164	-0.00078197	0.001347
An18g01870	0.0073954	-0.0050123	0.0021566	-0.0070506	-0.00205	0.0073014	-7.2395e-05	0.0055192	-0.0060065	-0.0015144
An18g01860.Aspni5_188069	0.010978	0.00012165	-0.0048169	0.0040936	0.012036	0.0033841	0.0012058	0.0053932	0.004914	0.00026077
An18g01850	1.8027e-05	-0.0031042	0.0011976	-0.0004197	0.00058618	-0.0093898	0.0037892	0.0054731	0.0074853	-0.00061428
An18g01840.Aspni5_49807	-0.0019179	-0.00080922	0.0018248	0.00088385	0.0039191	-0.00070476	0.00055843	0.0055565	0.0027929	-0.0018503
An18g01830.Aspni5_42684	-0.0023179	-0.0018635	0.004879	-2.8398e-05	-0.0052601	0.00018664	-0.0094381	0.0019804	-0.0051427	0.0047745
An18g01810.Aspni5_42683	-0.011377	-0.013084	0.03262	-0.0024729	-0.00015618	0.017361	-0.0040013	0.028793	0.042469	-0.022907
An18g01800	-0.0043815	-0.011223	0.0038656	0.00099216	-0.0014338	-0.001257	0.00086949	-0.0062165	0.0027252	0.0015151
An18g01790	-0.004908	-0.022708	0.014253	0.00032236	-0.0016782	0.024874	-0.0017893	0.016541	0.0072307	-0.020136
An18g01780.Aspni5_54097	-0.026993	-0.019649	0.011616	0.0028477	-0.0076245	0.028591	0.0049157	0.026084	0.0047398	-0.012275
An18g01770.Aspni5_187288	-0.00028057	-0.0083158	-0.0011895	-0.00029425	0.0020204	-0.0049529	0.0030019	0.00038914	-0.00092009	-0.0055412
An18g01760.Aspni5_187615	-0.0062545	0.003534	-0.020664	-0.0040353	-0.0035072	0.0076733	-0.0079327	-0.0029607	-0.0077083	0.025152
An18g01750.Aspni5_42679	0.0055065	0.00071612	-0.0044053	-0.005003	0.001366	0.0047307	0.0011343	-0.0060883	-0.0063445	0.0098321
An18g01740.Aspni5_211815	0.0078872	-0.0085606	-0.00028165	0.0079478	-0.0095043	-0.0031179	-0.0048345	-0.0042994	-0.0007394	-0.0063172
An18g01730	0.016852	-0.0025856	-0.0060332	0.0060107	-0.0043621	0.0080544	0.0037761	0.01286	-0.00072398	0.0097598
An18g01720.Aspni5_140172	0.008043	0.0082426	0.011331	-0.0081008	0.00070644	0.001448	0.0065213	0.0051749	0.00020154	0.0042687
An18g01710	0.007073	0.010909	0.0022583	-0.0018162	-0.0040159	-0.0011324	-0.0087394	-0.0038521	-0.0098006	0.0086383
An18g01700.Aspni5_54095	0.025304	0.047961	0.012196	-0.0085737	-0.0034844	0.0031724	0.01101	0.011527	-0.0077219	0.017005
An18g01690.Aspni5_123758	0.00028849	0.0031992	0.0040729	-0.0017618	1.5961e-05	0.0024475	-0.0036107	-0.00088545	-0.0069572	0.0045009
An18g01680.Aspni5_187622	0.0016611	0.0026617	0.0018648	-0.015175	0.0052149	0.0036303	-0.0033022	-0.011995	-0.0046713	-0.0038114
An18g01670.Aspni5_54093	-0.010897	-0.014026	0.0095404	0.012608	0.0012253	0.0042288	-0.0066508	-0.0066033	0.0017803	0.0031367
An18g01660	-0.0091838	-0.0099268	0.010409	0.014315	0.00078923	0.0033302	-0.0034735	-0.0065518	0.006423	0.0024142
An18g01640.Aspni5_42671	-0.017964	-0.018834	0.026595	-0.0078492	0.0015724	0.0037411	-0.0082192	0.012833	0.022391	-0.016598
An18g01630.Aspni5_123460	0.02151	-0.025993	0.0097357	0.013566	0.00688	-0.0089931	-0.0046377	-0.001447	-0.0045149	-0.0044893
An18g01620.Aspni5_42669	0.0026074	-0.021108	0.027871	0.00458	0.010748	0.0035636	-0.0087451	0.0033381	0.023284	-0.017292
An18g01610.Aspni5_187212	0.0025721	-0.0026143	0.0064491	0.0051249	-0.0042675	-0.0027042	-0.0020808	-0.0039001	0.0017612	0.00011209
An18g01600.Aspni5_187950	0.0048439	0.025907	0.015309	-0.015031	0.0051695	0.013638	-0.0050413	0.0036935	-0.017525	0.012632
An18g01590.Aspni5_120926	-0.0043172	0.024179	0.014034	-0.0062851	0.00668	0.0049335	0.0059492	-0.0034659	-0.0094154	0.012545
An18g01580.Aspni5_137120	-0.029661	-0.025241	0.010728	-0.0043985	-0.011226	0.02264	-0.0024632	0.0092486	0.0098867	-0.014402
An18g01570.Aspni5_134538	0.0004672	0.019833	0.022728	0.0054914	-0.00159	0.011082	0.0010935	0.017423	0.015785	0.0072086
An18g01560	0.00097515	-0.0043734	-0.0035394	-0.0093823	-0.0092907	-0.0068103	-0.0040002	0.0020583	-0.0017099	0.0048001
An18g01550	-0.0020389	-0.0015808	0.01926	0.0065076	-0.0069901	0.0068974	-0.0038601	0.004979	0.0084997	0.0064351
An18g01540.Aspni5_42664	-0.0083553	-0.017229	0.017261	-0.0097588	-0.034735	0.0014468	0.022228	-0.016175	-0.026349	0.03219
An18g01530.Aspni5_133797	-0.003347	-0.01505	0.02799	-0.014199	-0.031668	-0.0038915	0.0024883	-0.022981	-0.0027962	0.033468
An18g01520.Aspni5_49801	0.0022054	-0.0020747	-0.0018372	0.0013037	-0.004186	0.0031217	-0.0066708	0.0022557	-0.0046115	-0.00058426
An18g01510	-0.00061767	0.001457	-0.0056251	0.0010501	-0.006189	-0.003108	-0.0014698	0.0023607	0.011593	-0.0014242
An18g01500.Aspni5_42661	-0.0040572	-0.0058426	-0.0051051	0.00057327	-0.0061723	-0.01251	-0.0078218	0.0117	-0.00693	-0.0042247
An18g01490.Aspni5_187061	-0.0016486	-0.0021369	-0.00091856	0.0040588	0.0012851	-0.0039724	0.0019476	0.0037705	0.0012104	0.004122
An18g01480.Aspni5_187425	0.010428	-0.006625	0.0067433	-0.00080135	0.00098166	-0.0011793	0.0071958	0.005669	0.0015155	-0.014673
An18g01470	-0.0024212	-0.0030991	0.0027026	-0.00080536	0.0035919	-0.0043619	-0.0002521	0.0015529	-0.0021241	-0.00056019
An18g01460.Aspni5_187066	2.0348e-05	-0.0028593	0.0011032	-0.0011453	0.0037098	-0.0033511	-0.00090483	-0.001629	0.00083385	-0.001536
An18g01450	-0.00054922	0.0030306	-0.00015904	-0.00072675	0.0023875	0.00051692	0.0005279	-0.0020343	0.0071261	0.0074617
An18g01440	0.0057434	-0.005317	0.0041746	-0.0047969	0.0032492	0.011051	0.0027655	0.017354	-0.00083169	-0.0032178
An18g01430	-0.00090769	-0.0008288	0.0011495	-0.00014933	0.0027343	-0.0053282	0.00047365	0.0017936	-0.0043854	0.0020086
An18g01420.Aspni5_42657	0.00030409	-0.0012781	-0.0014185	-0.0019311	0.00040818	-0.0032428	0.0032866	0.0016517	0.0086423	-0.0045084
An18g01410.Aspni5_42656	0.037359	-0.039319	0.017322	0.0047008	-0.0024495	0.031889	7.3796e-05	-0.023556	-0.0059372	0.021281
An18g01400.Aspni5_186889	0.00016059	-0.0034085	0.012519	0.0026121	-0.0030334	0.00072625	-0.0060116	-0.001921	-0.00018949	-0.0028411
An18g01390.Aspni5_42654	0.0022429	0.0044128	0.0071942	0.0019928	0.0020648	0.0026748	0.0034125	0.00087942	-0.00049917	0.00025203
An18g01380.Aspni5_128818	0.0033018	-0.0069381	0.014792	-0.0034732	0.0042038	-0.0067526	0.003207	-0.0071597	0.0022773	-0.003988
An18g01370	0.0021847	0.0010344	-0.0032792	-0.0032406	-0.0014382	-0.0045755	-0.0011817	0.0040963	0.014267	0.0056423
An18g01360.Aspni5_42651	-0.0078789	-0.0047395	0.015866	-0.0099745	0.010947	-0.0080849	0.011729	0.016144	0.010186	-0.019784
An18g01350.Aspni5_211800	-0.0034407	-0.00017445	0.0021253	-0.025774	-0.011277	-0.0049489	0.015119	0.0018049	-0.010188	-0.014478
An18g01340.Aspni5_42649	0.0073013	-0.0027937	-0.0042287	-0.0060033	0.0056891	0.0026541	-0.0031359	0.0031702	0.0036018	0.0070814
An18g01330.Aspni5_187977	0.0043645	-0.004685	-0.0076306	-0.0053033	-0.0063613	-0.0027586	-0.0047859	0.0096914	-0.015996	-0.0020956
An18g01320.Aspni5_211797	0.0021907	-0.0018871	-0.0021247	-0.011403	0.0083256	0.0028924	0.010234	0.0032311	0.0029112	0.0024902
An18g01300.Aspni5_187015	0.012344	0.0093219	0.0040569	-0.0080342	-0.0092144	0.00030162	0.00061146	-0.0055122	-0.0011639	-0.00378
An18g01290.Aspni5_187796	0.0030745	0.0065863	0.0094529	-0.016639	-0.0043863	0.0081193	0.010856	-0.00014081	-0.0043905	0.0028391
An18g01280	0.001541	0.0078561	0.0018565	-0.02217	-0.0015543	0.0038269	0.0052149	0.0088433	-0.014286	-0.0043552
An18g01270	-0.00070182	-0.005826	0.00093066	0.00011152	0.008916	-0.0017545	5.8516e-05	-0.010223	0.0068421	0.00088929
An18g01250	0.01394	-0.0028978	0.0017559	-0.0070783	0.011761	0.0084269	-0.0028736	0.0003568	-0.0011122	-0.01175
An18g01240.Aspni5_56753	0.0065165	-0.019235	-0.0024391	-0.00060641	-0.0057379	0.0047888	0.005402	-0.013083	-0.0067359	-0.010151
An18g01230.Aspni5_125004	0.011378	-0.023917	0.0045726	0.004512	0.0011356	-0.00036812	0.0012711	-0.01412	-0.0028828	0.0014339
An18g01220.Aspni5_211789	0.010618	-0.01996	0.0047319	0.0087076	-0.0054833	-0.00015108	0.00061902	-0.016113	-0.00066173	-0.00052944
An18g01210.Aspni5_187381	0.002394	-0.0017191	0.0016871	0.0030249	-0.0012658	-0.0072301	-0.010404	3.6333e-05	-0.0019973	0.00026542
An18g01200.Aspni5_187510	0.0042867	0.014859	0.00047338	-0.0034491	-0.0060772	-0.010147	-0.0059325	-0.0046287	-0.0054661	-0.00070845
An18g01180.Aspni5_202252	0.016532	0.0065791	-0.00062682	-0.0093704	-0.0019231	-0.0058172	0.0073666	-0.0099708	-0.0023065	0.0042299
An18g01170.Aspni5_42644	0.0019181	-1.626e-05	0.0035194	-0.00045393	0.0022132	-0.0015019	-0.006084	0.0075605	0.00078625	0.00012641
An18g01150.Aspni5_202248	-0.010957	0.00052265	-0.020072	-0.009363	0.017569	0.004042	0.0061826	-0.016719	0.0063574	0.014334
An18g01140.Aspni5_42642	0.0047404	-0.00064569	-0.006912	0.00026897	-0.011187	-0.0028652	3.7189e-05	-0.0062919	0.003943	-0.0087781
An18g01130.Aspni5_42641	0.010697	0.013944	-0.00052069	0.0023002	-0.0013858	0.0018139	0.0013655	0.010105	-0.0067113	-0.0042965
An18g01120.Aspni5_131188	0.0052417	-0.0057154	0.0023913	0.0033607	-0.0025553	0.006286	-0.00085189	0.0035209	-0.0042882	0.0023466
An18g01110	0.015157	-0.0036065	0.0031326	-0.0091057	0.022085	0.01053	-0.007222	0.0010801	0.0065636	-0.011472
An18g01100.Aspni5_187238	0.012485	0.0077287	-0.0084386	-0.00031672	-0.0063075	0.0013063	0.0088587	-0.017951	0.016474	-0.00054173
An18g01090.Aspni5_139485	0.00080967	-0.0035876	-0.0010297	-0.0041372	-0.0029294	-0.00043506	-0.0039052	0.0010246	-0.0053329	0.0077763
An18g01080	0.0091135	0.0053402	0.0045384	-0.010001	-0.0031831	0.0064792	-0.013277	0.0038969	-0.00096197	0.0038625
An18g01070.Aspni5_187815	0.022566	0.022491	0.016163	-0.012945	-0.014934	0.013845	0.0021441	-0.0019798	-0.001014	0.013185
An18g01060.Aspni5_49792	0.014368	-0.022157	0.01596	-0.0050107	0.0013851	0.027828	0.0052166	0.0052609	0.0013556	0.012444
An18g01050.Aspni5_211780	0.0081027	0.0093352	0.00068787	-0.012042	-0.0033074	0.0098084	0.00027065	-0.01248	-0.0025931	-0.0030685
An18g01040.Aspni5_211779	0.0022445	0.0013377	0.0062575	-0.0028072	-0.005793	-0.0015425	-0.0010435	-0.0015962	0.0061917	-0.0025444
An18g01030.Aspni5_123260	0.012165	-0.0060823	0.0049641	-0.01183	-0.0093646	0.011125	0.0091185	0.0064475	0.0018903	0.0072041
An18g01020.Aspni5_187293	0.022075	-0.0041985	0.013154	-0.009372	-0.0047715	0.0097512	0.0060345	0.0077788	0.004928	0.00042123
An18g01010.Aspni5_140013	0.00099317	-0.0037225	-0.00050915	-0.0025175	-0.019158	-0.0064827	0.0025417	-0.0070917	0.0061421	-0.0091305
An18g01000	-0.0019552	-0.0066603	-0.010672	-0.0027465	-0.021693	-0.0075559	0.0030115	-0.0038426	0.0059251	-0.0086965
An18g00990	-0.0018242	-0.0049045	-0.014588	-0.0053076	-0.02454	-0.0072325	0.0032412	-0.0012083	0.0068945	-0.0062644
An18g00980	0.010817	-0.0010549	-0.013575	-0.010391	-0.015675	-0.0029059	0.0030821	-0.001638	0.0040808	-0.012133
An18g00970	0.010626	-0.0013674	-0.0065209	-0.0043255	-0.002789	0.010586	0.0020504	0.0069457	0.023133	-0.0026208
An18g00960.Aspni5_211774	0.0076316	-0.0014317	-0.015071	0.002446	-0.017256	0.0022415	0.00436	-0.0040115	0.012401	-0.012391
An18g00950.Aspni5_54083	-0.00020592	-0.003217	-0.0039719	-0.0090988	-0.015292	-0.0023033	0.0026291	-0.0081189	-0.0010947	0.00087221
An18g00940.Aspni5_187819	0.011401	-0.0011917	-0.0029469	-0.0032582	-0.0012432	-0.00017687	-0.0022151	-0.0033859	-0.0016905	-0.0012357
An18g00920	0.0066432	0.00021371	0.0093916	-0.0030072	0.014106	-0.004234	-0.017027	-0.0016147	0.008846	-0.005992
An18g00910.Aspni5_211773	0.0081206	-0.009125	0.0069219	-0.0074769	-0.020744	-0.0056762	0.0077925	-0.0042058	-0.0017647	-0.0048848
An18g00900.Aspni5_49789	0.0019852	-0.0047316	0.0041514	-0.0020667	-0.0061766	-0.00079721	-0.01166	-0.0028769	-0.0079958	-0.00095541
An18g00890.Aspni5_42626	0.0045507	0.0027699	0.0041762	0.0059379	-0.0019361	-0.0075956	-0.0059417	0.0046832	-0.0018759	0.0038344
An18g00880.Aspni5_126316	0.013869	0.003717	0.00078161	-0.0065488	-0.0098496	-0.0067274	-0.0057534	-0.007085	-0.007481	-0.0087421
An18g00870.Aspni5_187805	0.009457	-0.0037034	-0.0021936	-0.0031053	0.011945	-0.00020333	0.012341	-0.031642	-0.0045972	0.0069908
An18g00860.Aspni5_42623	0.0041662	-0.00053393	0.010194	0.00073735	-0.0011317	0.0026353	-0.0039461	0.0022651	-0.00089799	-0.0075421
An18g00850.Aspni5_42622	-0.010972	-0.0046524	0.014458	0.0091494	-0.014133	0.013788	-0.024941	0.015176	-0.021054	-0.0068229
An18g00840.Aspni5_42621	-0.0033918	-0.0032632	0.016517	-0.0054671	0.0018641	0.009644	-0.014089	0.021854	-0.026243	-0.0064311
An18g00830	-0.0018631	-0.0019978	-0.00014185	-0.016458	-0.0020748	0.0001907	0.00011184	0.0017702	0.0018207	0.011959
An18g00820.Aspni5_54081	0.0015535	-0.00065637	0.0053881	-0.0016933	-0.0021172	-0.0003651	-0.0030179	-0.00054178	-0.0039252	-0.004288
An18g00810.Aspni5_42619	0.0034929	0.0057862	0.007312	-0.0051784	-0.0035762	0.0036091	-0.00098726	0.010807	-0.0019298	0.00074211
An18g00750.Aspni5_187809	0.016835	0.0039685	-0.0094377	-0.020098	0.0017823	0.00035732	0.0031159	0.0070028	-0.021551	-0.0097728
An18g00740.Aspni5_54080	0.0021199	-0.0044214	0.0078331	-0.0067898	-0.0062098	-0.0052964	0.0045944	-0.0035784	0.00026182	-0.002427
An18g00730.Aspni5_54079	0.0030882	-0.01249	0.01256	-0.00029104	-0.012114	-0.003044	0.0037691	-0.0045318	0.0023389	-0.0052376
An18g00720	-0.0021276	-0.010711	0.0066699	-0.027925	-0.014195	-0.0099927	-0.0095279	0.0027326	0.014654	0.015907
An18g00710.Aspni5_42615	0.0030079	-0.0085857	0.011037	-0.0074913	0.0011514	3.1285e-05	-0.0047482	-0.0012645	0.0084102	-0.00019707
An18g00700.Aspni5_187934	0.0025772	-0.0048932	-0.0023036	-0.015308	-0.0019958	-0.015069	-0.0022007	0.011932	-0.0040687	0.0070873
An18g00690.Aspni5_42613	0.013706	0.014417	0.0017287	-0.0011434	-0.0042931	-0.003968	-0.0026598	-0.0035176	0.0029443	-0.0078293
An18g00680.Aspni5_42612	0.0050133	0.00080396	0.004639	0.0013942	-0.010397	0.00076001	-0.0026373	-0.0049776	0.0036307	-0.0067485
An18g00670.Aspni5_187232	0.0014244	0.0006105	-0.0033229	-0.00769	0.0024505	-0.0047991	0.013573	0.0082345	0.013085	0.0068752
An18g00660.Aspni5_211766	0.0014473	-0.0022536	-0.001591	-0.001449	0.0041536	0.0084884	-0.00068769	0.0083732	-0.0002958	-0.0018358
An18g00650.Aspni5_42609	0.0062906	-0.00091474	0.0047851	-0.0050891	-0.0056049	-0.0021298	-0.0014359	0.0021574	0.0077673	-0.0035184
An18g00640	-0.0090838	-0.0050419	0.0096717	0.0060773	-0.0062351	-0.012477	0.0014667	0.011118	0.0042433	0.0050574
An18g00630.Aspni5_54077	0.010382	0.0076596	0.010581	-0.012598	-0.010709	-0.0007571	0.0093026	-0.0061439	0.0093547	-0.0052767
An18g00620	0.005045	-0.0046413	0.010794	-0.0026714	-0.0031883	-0.011601	0.0055096	-0.00012973	0.012577	-0.0086018
An18g00600.Aspni5_56751	-0.016832	-0.0054762	-0.0087847	-0.01823	-0.0027194	0.018874	0.024911	0.018669	-0.017305	0.012673
An18g00590	-0.0066328	-0.00025977	-0.0071592	-0.007315	-8.2524e-05	0.010458	-0.0039501	0.011939	-0.0017686	-0.0086184
An18g00580	-0.001687	-0.0046944	0.00044518	-0.0023299	0.0042026	-0.00021853	-0.0014936	0.0061174	0.0014358	-0.0027411
An18g00570.Aspni5_134351	0.013296	-0.0082681	-0.00047099	0.0048491	0.020467	-0.0032383	-0.005544	0.0092265	0.010244	0.010421
An18g00560	-0.004514	0.0026812	0.0044938	-0.0087072	-0.0014786	0.012155	-0.016339	-0.0042105	-0.0011139	0.016938
An18g00550.Aspni5_42606	0.0022435	0.0042809	-0.00055609	-0.002	-0.0016121	-0.0022756	-0.019169	0.020696	-0.00013007	0.010203
An18g00540.Aspni5_119175	0.00069442	-0.0033859	-0.0021358	-0.0024487	0.007135	-0.0082959	-0.0011425	0.0047754	0.0068529	0.0032922
An18g00530.Aspni5_139484	0.0060604	0.0015528	-0.0007579	0.0047669	-0.0036949	0.02046	0.0040006	0.012286	-0.0029656	0.014351
An18g00520	0.0062424	0.0013546	0.0075819	0.007377	0.0032777	0.011531	0.0071905	-0.002165	0.0039906	0.01574
An18g00510.Aspni5_42603	0.031332	-0.029171	0.0013061	0.012569	-0.0092735	0.016893	0.00076983	-0.018649	-0.010036	0.0085637
An18g00500.Aspni5_42602	0.014991	-0.0011102	-0.0035632	0.0081847	-0.0050643	0.005438	-0.0070607	-0.0052301	-0.0097619	0.0036304
An18g00490.Aspni5_42601	0.02105	-0.01891	-0.00053711	0.0071327	-0.0053539	0.01043	-0.0001558	-0.013675	-0.0088396	0.011038
An18g00480.Aspni5_42600	0.034881	-0.040965	0.0070794	0.012513	-0.014242	0.011016	0.0061863	-0.029	0.0022695	0.015903
An18g00470.Aspni5_187320	0.038283	-0.049825	0.0044212	0.0013437	-0.0096668	0.0028436	0.0055976	-0.023322	0.003974	0.017521
An18g00460.Aspni5_42599	0.0025781	0.0084221	-0.0006913	0.0071839	-0.008559	-0.0039539	0.002028	0.0043918	0.0043611	0.0092103
An18g00450	0.00086696	0.0015544	-0.0028542	-0.0032459	-0.0072793	0.0040073	-0.0051518	0.016714	0.002614	0.0053511
An18g00440.Aspni5_211758	0.015719	0.023424	0.010056	-0.0097753	-0.0086324	0.0018159	0.0078872	0.01288	0.0076577	0.004684
An18g00430.Aspni5_188035	0.016661	0.014816	0.0036769	-0.0036046	0.00055718	0.0068794	0.0016884	0.0084738	0.016974	0.0010141
An18g00420.Aspni5_123450	-0.011933	-0.0084051	0.0094257	-0.0018128	-0.015744	0.0026314	0.0065065	0.0030307	0.0061432	0.0020685
An18g00410.Aspni5_187009	-0.0072464	-0.01289	0.004266	0.00016667	-0.0095434	-0.01	0.0054066	0.0019346	-0.0048812	-0.0067041
An18g00400.Aspni5_54073	-0.007429	-0.019841	0.0091029	-0.0017552	-0.014814	0.0033428	-0.00065142	-0.0099221	6.1049e-05	-0.0094039
An18g00390.Aspni5_127004	-0.0035111	-0.009724	0.0096996	0.00032324	-0.00064651	0.0015836	-0.0026938	-0.0019086	-0.006616	-0.00072294
An18g00380.Aspni5_42592	0.0078817	0.0025627	-0.00059965	0.0033599	0.00066633	0.0015647	0.00059688	-0.015104	-0.0032869	-0.0062266
An18g00370.Aspni5_54072	-0.0096059	-0.0058987	-0.017091	-0.02612	0.018917	0.0034988	0.0095834	-0.012836	-0.0093649	0.013127
An18g00360	-0.0026945	-0.0035866	-0.00032242	-0.016772	-0.0027251	-0.0096424	-0.0038963	-0.0066236	-0.0020988	0.0078774
An18g00350	0.0069019	-0.01297	-0.017206	0.0040243	-0.017047	-0.013299	-0.032553	-0.001622	-0.0051836	0.01354
An18g00340	0.012715	-0.011244	-0.0097409	0.003925	-0.0059957	-0.017285	-0.0091205	-0.0052772	-0.012188	-0.00079231
An18g00330.Aspni5_187859	0.0052762	-0.0055915	0.0090011	0.0064308	-0.012696	0.015004	-0.011396	0.010099	-0.023252	-0.0092302
An18g00320.Aspni5_187909	0.0051026	-0.0018467	0.010249	0.00033497	-0.0013099	-0.0032662	0.00031708	-0.0057323	-0.0024348	-0.0025737
An18g00310	0.0017078	-0.00024214	0.0056647	0.0015419	0.00012387	0.0044748	-0.0011762	0.016333	0.0048962	0.011998
An18g00300.Aspni5_132972	0.016258	-0.003655	-0.0064712	-0.0028597	0.0073363	-0.00229	0.00079051	0.0076073	-0.0032906	-0.011645
An18g00290.Aspni5_187979	0.01108	0.002142	-0.0070496	0.0056248	-0.0045444	-0.0050013	-0.013732	-0.0028571	-0.0036205	-0.0034402
An18g00280.Aspni5_187349	0.0018874	-6.2808e-05	-0.00064001	0.00071343	-0.0026214	-0.0020974	3.5347e-05	-0.0026881	-0.0013263	0.00032716
An18g00270	0.011409	-0.0093104	0.01727	-0.01108	-0.0061634	0.0053236	0.013878	0.0057949	-0.012378	-0.010676
An18g00260.Aspni5_140548	0.0086621	-0.0073505	0.00090869	-0.0034267	-0.0080023	0.0024206	-0.0013613	0.00050728	-0.0057792	-0.00049228
An18g00240.Aspni5_42585	0.0057832	0.009707	0.0033966	-0.005026	-0.001301	0.0098175	0.0033458	-0.0064143	0.0028656	0.0045938
An18g00230.Aspni5_126382	-0.004759	-0.011497	0.0093753	-0.014354	0.003695	0.0052767	-0.0065594	-0.0049692	0.01304	-0.018957
An18g00200	0.0070668	-0.00071455	-0.00288	-0.01442	0.0055219	-0.0075012	0.0018996	0.0098838	0.0022808	-0.0069374
An18g00190	0.0040156	-0.012075	0.0079815	-0.023771	-0.0051399	-0.012836	0.0071436	0.021282	-0.0024465	-0.01627
An18g00180	-0.0010304	-0.013178	-0.0099274	-0.022111	-0.0022013	-0.0095674	-0.013365	0.0010654	0.012545	-0.0062527
An18g00170.Aspni5_54071	0.0029634	-0.0023587	-0.00080432	-0.0066387	-0.006359	-0.0047982	0.0011681	0.0021604	0.0022304	-0.004431
An18g00160	-0.001298	-0.00032176	0.0083963	-0.011425	-0.002933	-0.0079352	-0.011556	0.015634	0.0046207	0.0049211
An18g00150	-0.011875	-0.012367	0.0016502	-0.027315	-0.01108	0.0093939	0.0012643	-0.020839	-0.0024559	0.0033426
An18g00130	0.00018309	0.00085847	-0.00017391	0.0017352	0.0003391	0.00042063	0.004183	-0.0022666	0.0033959	0.0068608
An18g00120.Aspni5_187756	-0.005326	-0.010018	0.0088689	-0.0023824	0.0032149	-0.010704	-0.0095989	-0.014255	0.011439	0.0059192
An18g00110.Aspni5_187660	0.0050203	-0.0059836	0.0030655	0.00061646	0.004753	-0.0067908	-0.0069383	0.0050785	-0.00074577	0.002184
An18g00100.Aspni5_187454	0.0043771	-0.01105	0.0038634	0.010107	-0.0019731	0.0097511	-0.0079228	0.0060251	0.0086985	-0.017219
An18g00090.Aspni5_42579	0.007985	-0.001489	-0.0018924	0.0034385	0.0017905	0.0070649	-0.0094548	0.0051942	-0.004739	0.0060162
An18g00080	0.004339	0.0019025	-0.0020705	-0.0022797	-0.00054046	-0.0044237	-0.0054705	0.011792	-0.0035973	0.0072503
An18g00070.Aspni5_42578	-0.0049316	0.0084629	0.0070617	-0.0046406	-0.0088793	0.00080083	-0.012991	-0.0078474	-0.0068229	0.011548
An18g00060.Aspni5_132241	0.0011338	0.0069817	0.0070037	-0.0013638	0.0020607	-3.8696e-05	-0.00046328	-0.0058496	0.0012919	-0.00055306
An18g00050.Aspni5_186986	0.00081578	0.001977	0.0034401	-0.0051275	-0.0002421	0.00059453	-0.0056418	-0.0079934	0.0037084	-0.0048557
An18g00040.Aspni5_49775	0.0070809	0.005419	0.0056784	5.3751e-06	-0.001627	0.0036144	-0.0026266	0.0032103	-0.0016355	-0.0044155
An18g00030.Aspni5_187189	-0.0039753	0.0029854	0.0095727	-0.0017229	0.0016475	0.0083581	-0.011988	0.0013788	-0.012778	0.0078094
An18g00020	-0.0015413	-0.0029159	0.0017225	0.0013481	0.0051699	-0.0037693	-0.0027728	0.0031925	-0.0029457	0.0019212
An18g00010.Aspni5_42574	-0.0015752	-0.0039466	0.0055407	-0.0070361	0.00090868	-0.0087806	0.0075619	-0.0038771	0.00079128	-0.0021438
An18e00930	0.0043996	0.00027136	-0.0033687	0.00050425	-0.00057112	-0.0037902	0.0027771	-0.0071826	-0.0034567	0.0070925
An18e00610	0.0070527	-0.0041198	-0.0065047	-0.0065929	-0.0055616	-0.0012659	0.0028497	-0.0098813	0.00027427	0.012573
An17g02400	0.015391	-0.0049118	-0.0091378	-0.0066813	-0.0077778	-0.0015916	-0.033853	0.0034948	-0.02125	0.010461
An17g02390	0.00042345	-0.0025294	-0.00042829	0.0046093	-0.0012266	-0.0014975	-0.0051502	-0.0017364	-0.0039515	0.00033477
An17g02380.Aspni5_204597	0.0024016	-0.0019454	0.00015844	-0.0019639	-0.0028184	-0.0014492	-0.0055612	0.00059064	-0.001635	-0.0029986
An17g02370.Aspni5_54952	0.0036661	0.00036366	0.00073097	-0.0044532	-0.0015853	-0.0027247	-0.0085263	-0.00024032	-0.0033211	-0.0036441
An17g02360.Aspni5_193056	0.0045383	0.00095068	0.004565	0.00015123	3.9251e-05	-0.0033548	-0.0060895	0.002355	0.0016079	-0.0012624
An17g02350.Aspni5_192649	0.0026425	-0.0045961	0.00059864	-0.0066389	0.0039994	-0.0021774	-0.0095195	0.0025742	0.0010053	-0.0034485
An17g02340.Aspni5_57312	0.0039244	-0.0014336	-0.00049138	-0.00087219	-0.00049711	-0.0021717	-0.0072291	0.00014078	0.00063894	-0.0002333
An17g02330.Aspni5_57311	0.0021547	-0.010771	-0.0026797	0.00059562	-0.00070308	-0.0025308	-0.0070314	-0.003234	-0.00030514	-0.0010785
An17g02320.Aspni5_214151	0.0039545	0.00082554	0.0026861	-0.0019216	0.00034333	-0.0016773	-0.0093635	0.0045545	0.00032738	-0.00076453
An17g02310.Aspni5_214148	0.002107	-0.0012754	0.00091748	0.0012675	0.0034168	-0.0047394	-0.0043468	0.0024616	0.0040716	-0.0001387
An17g02300.Aspni5_192770	0.0011146	-0.0021642	-0.00080946	0.001358	0.0012023	-0.0055482	-0.0028256	0.0017398	-5.5129e-05	0.0014978
An17g02290.Aspni5_214140	0.0012225	0.0018424	0.0045946	-0.0036674	0.0023417	-0.0031227	-0.0080614	0.0032436	0.0054145	0.0014405
An17g02287.Aspni5_143320	0.0075605	0.0011287	-0.0016115	-0.0025698	-0.0037919	-0.0015305	-0.0049796	-0.001888	-0.0022749	-0.0063521
An17g02285.Aspni5_204569	0.0042105	0.0027479	0.0034506	0.0005093	-0.0036629	-2.5046e-05	-0.0075247	0.0049113	-0.0018363	-0.002708
An17g02280.Aspni5_54942	-0.0005531	-0.0057075	-0.00077033	0.0036294	0.00045461	0.0002154	-0.0056867	0.0011763	0.0015869	0.0036771
An17g02260.Aspni5_214129	0.0039265	0.0012991	0.0050112	-5.3664e-05	0.0034694	-0.00066033	-0.0017918	0.0012662	0.0060671	0.0014658
An17g02250.Aspni5_51095	0.0034818	-0.0026117	-0.00013527	-0.0051964	-0.0010893	-0.0021375	-0.0077686	0.0024793	-0.0022842	-0.0019078
An17g02240.Aspni5_214126	0.0009707	-0.0032188	-0.00073214	0.0055361	-0.0032855	-0.0010565	-0.0033711	-0.0025449	-0.005444	-0.0012463
An17g02230.Aspni5_45232	0.0032108	0.0020313	0.0022376	0.001475	0.0027646	-0.0044367	-0.0050535	0.0038021	0.0019284	0.00094072
An17g02220.Aspni5_54939	-9.2569e-06	-0.0086414	0.0051874	0.004312	-0.00394	-0.0091884	-0.0048508	-0.0026683	0.0016661	-0.0060789
An17g02210.Aspni5_54938	0.0027476	-0.0030299	-0.00014776	0.00069696	-0.0030005	-0.0026122	-0.0039271	-0.0018033	-0.0030459	0.0013278
An17g02190.Aspni5_193079	0.0026536	-0.00079307	0.0035092	0.00018975	-0.0018599	-0.0034377	-0.002054	-0.0016938	0.0003762	-0.0015455
An17g02180	0.0056558	-0.0012468	-0.00029621	0.0038199	-0.0021232	-0.0030152	-0.0019707	0.002482	0.0010306	-0.0067448
An17g02170.Aspni5_214112	-0.00081257	-0.003704	-0.0062227	0.0025448	0.0010164	-0.0044191	-0.0021296	-0.00066021	-0.001258	0.0049585
An17g02160.Aspni5_192427	0.0020056	0.0010901	0.0041849	0.0014595	0.0010255	-0.0041909	-0.0046805	0.0019294	0.001494	-0.0016561
An17g02150.Aspni5_51089	0.0067023	-0.0034813	-0.0021816	0.0019957	0.00097664	-0.0021163	-0.0080833	0.0012862	-0.0024445	0.00055324
An17g02140.Aspni5_214109	0.0017379	0.00049906	-0.0008916	0.0011081	0.0028477	-0.00041614	0.0059824	-0.0012767	0.0030654	0.0040646
An17g02130.Aspni5_192439	0.0012841	-0.00099463	-0.00082857	0.0035798	-0.0011651	-0.0047869	-0.0037934	0.0028497	-0.0033181	0.00029818
An17g02120.Aspni5_54934	-0.00012677	-0.00097307	0.0032549	0.0011567	9.3075e-05	-0.0051824	0.002532	-0.0036836	0.0055135	0.0024436
An17g02110.Aspni5_45220	-0.000412	-0.0014051	0.0045295	0.0044366	0.0015406	-1.5946e-05	0.00046398	0.0014963	0.0036442	0.0018939
An17g02100	0.00056231	-0.0027825	0.0028599	0.00019298	-0.0032629	-0.0012798	-0.005541	0.0020058	-0.0036638	-0.0025891
An17g02095.Aspni5_54933	0.0026476	-0.0024346	-0.0042127	-0.0065067	-0.0046779	0.0045897	-0.0044904	0.00085137	-0.0015746	-0.0070601
An17g02090.Aspni5_214104	-0.00064326	-0.0027638	0.00015763	0.0026018	-0.0017284	-0.0017396	-0.0049981	0.0018195	-0.0026963	0.00048566
An17g02080.Aspni5_57297	-0.0018633	0.00016016	-0.004754	0.0027424	0.0037276	-0.0015588	0.0038316	0.0047652	0.00037647	0.0039956
An17g02075.Aspni5_120917	0.0027014	0.0024203	0.010969	0.0012797	-0.003327	0.0011065	0.001233	0.0016316	0.00046245	-0.00030002
An17g02070.Aspni5_57296	0.0049234	-0.00057829	0.0014682	-0.0010156	0.0031912	-0.00478	0.0019713	0.0068777	0.0030259	0.0022962
An17g02060.Aspni5_120073	-0.0038158	0.0025797	0.0035515	0.0053073	-0.0084994	-0.0042819	0.0040423	-0.0035597	0.012021	0.0086109
An17g02050	-0.00089866	-0.0080189	-0.00072845	-0.021851	-0.0077625	0.020703	-0.020916	-0.010954	0.0065605	0.010812
An17g02040.Aspni5_128938	-0.0027576	0.0024858	0.0054466	0.0037504	0.0039306	-0.0044307	0.0041409	-0.0034935	0.0076327	0.0076272
An17g02030	-0.0003038	0.0022958	0.0024803	0.001902	0.0037928	-0.00010485	-0.0047519	-0.00069313	-0.0050404	0.0034759
An17g02020.Aspni5_192414	-0.0020826	-0.0017762	-0.00045252	-0.00066492	0.004975	-0.0025718	-0.0014183	0.0018196	-0.0036641	0.0037447
An17g02010.Aspni5_214094	0.0041308	0.0035074	0.0051147	0.0032382	0.0002617	-0.0036461	0.0042024	-0.0072096	0.0051631	0.0013275
An17g01977.Aspni5_57294	0.00054844	-0.0012928	0.0033216	0.0079616	-0.003162	-0.00028158	0.00080152	-0.0078947	0.0020989	0.001432
An17g01975.Aspni5_45208	0.0007256	-0.0029493	-0.002954	0.0016674	0.0017625	-0.0034104	-0.0015935	-0.0011673	-0.00030893	0.0041057
An17g01965.Aspni5_134837	-0.0051675	-0.00011107	-0.0029652	-0.0088324	0.011019	0.00067325	0.0078564	0.0026928	0.003939	0.0055384
An17g01955.Aspni5_57293	-0.0038633	-0.0060966	0.00012896	-0.010887	0.0063396	-0.0043723	0.0033394	0.0068981	0.0021731	0.0026858
An17g01945.Aspni5_54926	-0.00075804	0.00084439	-0.0022238	-0.0068698	0.00739	-0.0018641	0.0050145	0.00089966	-0.0017841	0.0020412
An17g01935.Aspni5_45204	0.0059406	-0.0035078	-0.0047072	-0.0068989	-0.0025013	-0.0090613	-0.0065972	-0.00059143	-0.0074066	0.0088113
An17g01925.Aspni5_57291	0.0028213	0.002561	-0.00090622	-0.0036998	0.0056746	-0.0017053	0.0039421	0.00045468	-0.0016323	0.0003347
An17g01915.Aspni5_45202	-0.0032638	-0.00046096	0.0038688	-0.029163	-0.0094904	-0.00068675	-0.007325	-0.012602	-0.0019983	-0.007773
An17g01905	0.0041091	0.00029672	0.0072391	-0.010803	0.005386	0.0011341	-0.0060917	0.00031143	0.0081402	-0.0071232
An17g01895	0.0018138	-0.0033518	-0.0055214	-0.0076352	0.0096049	0.0042043	-0.01078	0.0016191	0.0013611	0.0016367
An17g01885.Aspni5_192575	0.014317	-0.0029764	-0.010429	0.0020567	0.01291	0.0048886	-0.011354	-0.0046763	0.00025216	8.7813e-06
An17g01875.Aspni5_192646	0.001079	-0.0014033	0.0016244	0.0012145	0.00094409	-0.0016674	-0.00069059	0.0026155	0.0016348	0.0003581
An17g01865.Aspni5_120585	0.005474	0.004207	0.0027459	-0.0028092	0.00061244	-0.0038209	-0.0014209	-0.00051259	0.0021487	-0.0035242
An17g01855.Aspni5_136394	0.0043249	0.0021971	-0.0028714	-0.00078679	0.003968	-0.0092507	0.0013391	0.0038625	0.0047985	-0.0047886
An17g01845	-0.0014638	0.0080257	-0.0074785	-0.012457	0.01176	-0.0079911	-0.010483	0.0034437	0.012243	0.0013503
An17g01835.Aspni5_45195	-0.0028986	-0.007369	-0.015141	-0.027646	-0.00021815	0.00027276	-0.009465	0.0010312	-0.00077625	0.011111
An17g01825.Aspni5_51069	0.0019934	-0.00021884	0.0031564	0.0014334	0.0031536	-0.0047669	0.00069294	0.0017533	0.0060239	0.0042057
An17g01823	0.0010965	0.0050484	0.002635	-0.0007386	0.0093625	0.00021266	0.0058984	-0.0045005	0.016735	0.010514
An17g01815.Aspni5_214079	0.0028918	-0.0010157	0.0020497	0.0010986	-0.00041521	-0.0018935	-0.00089726	0.0025493	-0.0044409	0.0024181
An17g01805.Aspni5_51067	0.0024976	0.0022397	0.001194	0.00068151	0.0092278	-0.0033937	0.0059481	-0.0022162	0.0041304	0.002815
An17g01795.Aspni5_192595	-0.0039408	0.0053482	-0.0011383	0.00070292	0.0036923	-0.0081102	-0.0096326	0.0014797	0.0010145	0.00045904
An17g01760.Aspni5_45185	-0.012461	-0.0068989	0.0035494	-0.0045291	-0.0062798	-0.0063483	-0.013006	0.0086197	0.011486	-0.0054019
An17g01750.Aspni5_214063	-0.0045751	-0.0013676	0.0012322	0.0017313	0.0027428	0.0022354	0.0012156	0.0038094	0.0018043	0.0016811
An17g01740.Aspni5_134428	0.0044119	0.0031897	0.0011256	0.00018182	0.005325	-0.004333	0.00058903	-0.0051418	-0.0036415	0.0025519
An17g01730.Aspni5_192901	0.0042172	0.003424	0.0022428	-0.0018931	0.0060171	-0.0055043	-0.0030035	0.0007357	0.00026104	-0.00028681
An17g01720.Aspni5_57286	-0.00072471	0.0033288	0.013846	0.0035276	-0.0037839	-0.00040077	-0.0047273	-0.0053585	0.0059785	0.0043733
An17g01710.Aspni5_57285	-0.025698	-0.00037176	0.014524	0.0017254	0.0095322	-0.047411	-0.016389	-0.010792	0.012778	-0.0062884
An17g01700	0.0061787	-0.00045261	0.0028609	-1.5896e-05	-0.0017143	0.00013412	-0.0084202	0.0023254	0.0013181	-0.0003406
An17g01690	-0.012291	-0.0089579	-0.0067322	-0.023705	0.018034	-0.023827	-0.0407	-0.026056	0.016253	-0.00043392
An17g01680	-0.016774	-0.0088229	-0.0056147	-0.033518	-0.0016908	-0.0060133	-0.016302	0.0044729	-0.0044742	0.0056232
An17g01670.Aspni5_57284	-0.0010552	-0.0017506	0.0013024	0.00017816	0.0023565	-0.0020108	0.0021916	-0.0047609	2.9857e-05	0.0017868
An17g01660.Aspni5_51057	0.0035257	0.0022492	-0.0020595	0.00049545	0.0065349	-0.0040844	0.0022777	-0.0034925	0.0010409	0.0038174
An17g01650.Aspni5_127896	0.001575	-0.0006015	0.0025118	-0.0012694	-0.0021231	0.00022966	-0.0023912	0.0010695	-0.001014	-0.0012662
An17g01640.Aspni5_51056	0.0050324	-0.0035589	0.0039735	0.0015478	-0.0055831	-0.004272	-0.011994	-0.0045181	-0.00070838	-0.0022626
An17g01630.Aspni5_192425	0.0033529	-0.0039137	-0.004252	0.0023663	0.0033539	-0.0025462	-0.002043	-0.00036225	0.0029402	0.0055848
An17g01620.Aspni5_45175	-0.0016384	-0.00092617	0.0069032	-0.0026412	-0.0052213	-0.01287	0.00060787	0.0048131	0.0034213	-0.004625
An17g01610	-0.008764	0.0029711	0.0019186	-0.014111	0.00096479	-0.010707	-0.012932	0.0070638	0.0063355	0.0075321
An17g01600	2.1059e-05	0.0029918	-0.0013063	-0.0018754	-0.00097972	-0.00094114	-0.008528	-0.0041489	0.0023042	0.0016994
An17g01590	0.0024912	-0.0041646	-0.001008	-0.012689	0.0028568	0.0063856	-0.018035	0.014638	0.017571	0.010135
An17g01580.Aspni5_57283	0.0052272	0.0056479	0.00039911	0.0028582	-0.0010895	-0.0056777	0.0029457	-0.00015154	0.0042108	-0.0015413
An17g01570	0.0054501	0.0037124	-4.8504e-05	-0.0023486	-0.00075698	-0.0040792	-0.00079151	0.00041192	0.0032379	-0.0025897
An17g01560.Aspni5_214048	0.0027911	0.001194	0.00017456	0.002507	0.0042367	0.0013879	-0.0013631	0.00058472	-0.00089301	-0.00063474
An17g01550.Aspni5_57281	-0.0012331	0.0013579	-0.0044253	0.0019317	0.0038734	0.0048947	0.0074626	-0.0037206	0.0021667	0.0039708
An17g01540.Aspni5_193095	0.0096948	0.0027598	-0.0075955	-0.0030805	0.014405	-0.010292	0.0092248	-0.022091	-0.010172	-0.00035186
An17g01530.Aspni5_204476	-0.028811	-0.0092689	0.012331	-0.00090387	-0.012515	0.021444	0.0037961	0.01256	0.0017495	0.012778
An17g01520	-0.0057093	-0.0053595	0.0099064	-0.0039046	0.0040186	0.0082969	-0.0044485	0.0075588	0.0055397	0.0004467
An17g01510	-0.020402	-0.01051	-0.0039124	-0.021155	0.0009481	0.008192	-0.019858	-0.0062107	-0.00082053	0.0072243
An17g01495	-0.0050171	-0.00018972	-0.0027198	0.005359	0.006709	0.0030303	0.0014772	0.0035927	0.0039182	0.0090843
An17g01490.Aspni5_214038	-0.0040491	0.00037805	-0.0027779	0.0042191	0.0085223	0.004214	0.0035402	0.0010654	0.0038544	0.0101
An17g01480.Aspni5_214035	-0.0037012	0.0026861	-0.0029845	0.0076201	0.013537	0.0028782	0.0070728	-0.0045103	0.0056966	0.017074
An17g01470.Aspni5_45166	-0.0022118	-0.0028603	-0.0039596	0.0039592	0.0057763	-0.0052234	0.0019376	-0.004774	0.004993	0.007868
An17g01460	0.00064635	-0.0055399	-0.0022845	0.00014185	-0.0041061	-0.00092708	-0.011205	-0.0040104	-0.0079908	-0.0018502
An17g01450.Aspni5_122612	0.013419	-0.00059628	-0.00022356	-0.0041544	-0.0034523	-0.0013957	0.00037907	0.0030037	0.00044056	-0.0014441
An17g01440.Aspni5_192954	-0.002426	0.0024962	0.0064924	-0.0017988	-0.0036179	0.0012631	-0.00081884	0.0031573	-0.0034165	0.00054224
An17g01430.Aspni5_51046	0.006651	0.0030302	0.00078739	0.00078232	-0.00046805	-0.0031039	-0.0044487	0.0035921	-0.0045848	-0.0050724
An17g01420.Aspni5_57277	0.0014606	-0.00035464	-0.00072539	0.00034913	0.00031427	-0.0012389	-0.0025832	-0.0020533	-0.0019082	0.00079402
An17g01410.Aspni5_51044	1.2572e-05	0.0022848	0.0028833	0.0019651	0.0050785	-0.0012133	0.0030296	-0.0013709	0.0073775	0.0052171
An17g01400	-0.00094261	0.0028783	-0.0032431	0.0086292	0.0023147	0.0028865	-0.0011485	0.0030828	0.003799	0.0085422
An17g01390.Aspni5_204464	0.0012709	-0.0017638	-0.0031905	9.3412e-05	-0.0061176	-0.0097585	0.00016797	0.00021992	0.0090394	-0.006238
An17g01380	0.0053529	-0.0078641	-0.011422	-0.0020316	0.00014984	-0.0085439	-0.0086003	0.0075503	0.0086094	-0.0022972
An17g01370.Aspni5_192778	0.0045315	-0.0035905	0.00155	0.0014023	-0.00098679	-0.0074603	-0.0050393	0.0026514	-0.00039557	-0.012241
An17g01360.Aspni5_204461	0.00038128	-0.0021441	0.0002262	0.0057555	-0.0022399	-0.0026032	-0.0045181	-0.0052582	-0.0031114	-3.9162e-05
An17g01350.Aspni5_192940	0.0029558	-0.0015229	0.0046938	0.0034972	-0.0020015	-0.0032216	-0.003174	-0.002685	0.0046389	0.0021234
An17g01340.Aspni5_45156	0.001389	-6.8803e-05	0.0058704	-0.0012619	-0.00047198	-0.00059265	-0.0012558	-0.0036683	-0.0038445	0.0013608
An17g01330.Aspni5_214022	0.00066765	-0.0062573	-0.0010564	0.004735	-0.0028974	-0.0014871	-0.0028708	-0.0078163	-0.0028024	0.0049503
An17g01320.Aspni5_214021	0.0037946	0.0011648	-0.00062893	0.003479	0.006004	-0.0038584	0.0026381	0.00078664	0.0025264	0.0025375
An17g01310.Aspni5_192809	0.006919	-0.0018746	-0.0054217	-0.00024231	0.00054242	-0.0055743	-0.0050009	6.436e-05	-0.0047133	-0.0039139
An17g01300.Aspni5_45152	0.0063331	0.0078107	0.011722	0.0006833	-0.0059313	-0.00079494	-0.0022933	-0.0039761	-0.00023606	-0.0030351
An17g01290	0.0087038	0.0011002	0.0055131	-0.0057256	-0.0057144	0.0035134	-0.0094179	0.0046155	-0.011076	-0.0037484
An17g01280.Aspni5_214017	0.0041623	0.0028171	0.0056004	-0.00189	0.00033862	-0.0036161	0.00013335	-0.0016583	0.0041817	-0.0011899
An17g01270.Aspni5_57271	-0.0037988	-0.0018523	-0.0011387	0.0045635	0.0030243	-0.0045608	-0.0010545	-0.0010791	0.0023607	0.0073946
An17g01260.Aspni5_51035	0.0065691	0.0035856	0.00062937	0.0025001	0.0075005	-0.0015807	-0.0020327	0.002273	-0.0028743	0.0045805
An17g01250.Aspni5_57270	0.00081088	0.0015384	0.008894	0.00060857	-0.0053618	-0.0004837	-0.0014831	-0.0042467	-0.0034607	0.00051833
An17g01240	0.012831	-0.007452	0.023135	-0.0017445	0.0056213	0.012042	-0.017626	-0.0039671	0.0060286	-0.0052455
An17g01230	-0.0012197	-0.0053016	0.00012714	-0.008342	0.0010127	-0.00031825	-0.0097093	-0.0018177	0.0036471	-0.0065552
An17g01220	-0.00021958	-0.0069384	-0.0092935	-0.022819	0.00043629	0.0045258	-0.0090731	-0.0073117	-0.0028674	0.010375
An17g01210	-0.00070168	-0.0068937	-0.0096171	-0.020416	0.0096295	0.012335	-0.013076	-0.0065809	0.0095964	-0.007609
An17g01200.Aspni5_54902	-0.0029677	-0.0050026	-0.0019917	-0.015896	0.0079203	0.010511	-0.0089219	-0.012662	0.0078243	-0.0016524
An17g01180.Aspni5_204445	0.0010964	0.0016342	-0.0018691	0.003442	0.0094908	0.00064375	0.0043069	-0.0014398	0.0048298	-0.00028376
An17g01170.Aspni5_128861	-0.0075718	-0.0018716	0.00010594	0.0066271	-0.0016549	0.0032881	0.0058857	-0.0027031	0.01213	-0.00011755
An17g01160	0.00058993	0.0025866	0.0085825	-0.0028729	-0.004252	0.0032861	-0.0016172	-0.0022405	0.00016431	-0.00067712
An17g01150	-3.8343e-05	0.0017088	-0.00040316	-0.00019977	0.00087338	8.9212e-05	0.0021604	0.00065221	-0.0024012	0.0025938
An17g01140.Aspni5_54900	0.0043359	0.0014695	-0.0070877	0.0011547	0.0060686	-0.0056519	0.0054359	-0.0047906	0.003252	0.0022525
An17g01130.Aspni5_214000	0.0056862	1.986e-05	-0.0070581	0.00059328	0.0040838	-0.0061104	0.00060779	-0.0004732	-0.0029153	0.0025356
An17g01120.Aspni5_51030	-0.00018158	-0.0032533	0.0040889	0.0044751	0.0012018	-0.0053854	-0.0013372	-0.0040177	0.0014894	0.0061558
An17g01110.Aspni5_204434	-1.9133e-05	-0.0015845	0.0045154	0.00013957	-0.0034217	-0.00040636	-0.0046813	-0.0021813	-0.0030435	0.00059535
An17g01100.Aspni5_129107	0.0018421	0.0035277	0.007345	0.0018881	-0.0014282	-0.00030578	-0.00096926	-0.00439	0.00015141	0.0017265
An17g01090.Aspni5_192466	4.585e-05	0.00028807	0.0012314	0.0056803	0.0045255	-0.0031211	-0.00074039	-0.0066351	0.0073285	0.0077994
An17g01080	0.0020124	0.0058974	-0.0031968	0.0028648	0.0071062	-0.0078144	0.0023418	-0.0032599	0.0085273	0.0061696
An17g01070.Aspni5_193097	0.0058844	0.012647	-0.0067173	-0.0079503	0.0041933	0.0031248	0.011002	-0.020194	0.0077327	8.8973e-05
An17g01060.Aspni5_192821	-0.0025196	0.003336	-0.0080514	0.0028804	0.00073337	-0.0088015	-0.0078785	0.010983	-0.0066045	-0.0019006
An17g01050.Aspni5_192985	0.0016555	-0.0021198	0.008114	-0.0023671	-0.0003014	-0.0065368	-0.0012364	0.00489	0.0070959	-0.0020062
An17g01040.Aspni5_45134	0.00094611	-0.0025426	-0.0034095	0.00085393	0.0021435	-0.0027554	-0.012385	0.0028901	0.0016535	-0.0012409
An17g01030	0.0046718	-0.002618	0.0084939	-0.0011926	-0.00043434	-0.0049784	-0.0097116	0.0050396	0.00098521	-0.0033655
An17g01020.Aspni5_51026	-0.00043833	-0.0019063	0.01009	-0.0037605	-0.0065601	0.0014011	-0.0087238	-0.0040881	0.0003559	0.0006301
An17g01010	0.00084596	-0.0046749	-0.002448	0.0014449	-0.00041996	-0.001268	-0.0049857	-0.0029984	-0.0037773	0.0046142
An17g01000.Aspni5_54896	-0.0080936	0.0088242	0.0013159	-0.0028794	-0.0016754	-0.015258	0.0028048	-0.00219	0.01537	0.0060398
An17g00990	0.016766	-0.0055029	0.0018813	-0.0049811	0.026197	0.011354	-0.0039687	0.0055899	0.018722	0.0065335
An17g00980	0.0071324	-0.00052006	0.0049928	-0.0093469	0.0048421	0.00028919	-0.011817	0.0083281	0.022077	-0.0062907
An17g00970.Aspni5_45131	-0.011154	0.02161	-0.0077521	-0.0025538	-0.0037006	-0.0070355	-0.019705	0.0040508	-0.0015505	0.0087056
An17g00960	-0.00034106	-0.0083278	-0.0027997	-0.011953	0.0060029	0.0044132	-0.0098692	-0.013437	0.011818	0.0093497
An17g00950.Aspni5_45130	0.0002044	0.0012876	0.011975	-0.012528	-0.00084051	0.0084867	-0.011059	0.007704	0.0093431	0.0049177
An17g00940.Aspni5_125779	-0.002199	0.0069405	0.017142	-0.0042931	-0.012446	-0.00090593	-0.00018172	-0.00029466	0.0073304	-0.00025256
An17g00930.Aspni5_51025	-0.0090265	-0.0015169	-0.00030014	-0.012926	0.015368	0.010264	0.0051266	0.0019743	0.0060352	-0.0074369
An17g00920	-0.0009304	0.0013955	0.0040393	-0.021921	0.0088529	-0.0058387	0.001561	0.0039991	0.0073108	0.0029389
An17g00910.Aspni5_57265	-0.0054945	-0.0035644	0.013551	0.0030508	0.0053813	-0.0070034	0.012308	-0.0029737	0.0025042	0.0030413
An17g00900	0.0022458	-0.0026222	0.0029838	-0.0019018	-0.0002238	-0.0032186	-0.0024174	-0.00049164	-0.0029211	0.0017243
An17g00890	0.0029797	-0.0013523	0.0049488	0.00019681	-0.0046991	-0.0031787	-0.0025985	-0.0024101	-0.0018571	-0.0018158
An17g00880.Aspni5_192720	0.00029911	-0.0008201	0.0073351	0.0041835	-0.0020068	0.0017179	-0.0052613	-0.0068893	-0.0015375	0.0030029
An17g00870.Aspni5_51021	0.0096166	0.0041574	0.0075219	0.0062027	0.0026507	-0.0016618	-0.00019304	-0.0026728	0.0046236	-0.00093054
An17g00860.Aspni5_57263	0.0050581	0.0027726	0.004797	0.0055121	0.005209	-0.001981	-0.0022282	-0.0018109	0.003737	0.00016062
An17g00850.Aspni5_45120	0.00061973	-0.0021329	0.0014634	-0.00059245	0.00021418	-0.0021214	-0.0015923	0.00034021	-0.001306	0.0017874
An17g00840.Aspni5_51019	0.0045537	-0.00045753	0.0040537	0.00075779	-0.0038888	-0.002926	-0.0061517	-0.0037604	-0.0013448	-0.0019721
An17g00830.Aspni5_45118	0.0036064	-0.00073209	0.0049265	-0.00036111	0.0055652	-0.0042573	0.0035386	-0.0021071	0.0031725	0.005159
An17g00820.Aspni5_54890	0.0004304	-0.00014018	-0.0027511	0.0070841	0.0062506	0.00098247	0.00093008	-0.001458	0.00076955	0.0064114
An17g00810.Aspni5_193035	0.00013891	0.0042596	0.0045888	-0.0017534	-0.00048869	0.0055493	-0.001387	-0.00098609	0.0052389	0.0053701
An17g00800.Aspni5_192500	0.0055966	0.004425	0.0014271	-0.00092542	-0.0036699	0.00044702	-0.0017507	0.0012728	0.001992	-0.0033609
An17g00790.Aspni5_193100	-0.0006075	0.0046958	0.0059376	0.0054681	0.0047199	-0.0031779	0.0042578	-0.0026633	0.009115	0.0022059
An17g00780.Aspni5_133806	-0.00080778	-0.00083189	0.00028924	0.0034402	-0.0055662	-0.0032126	-0.0051608	-0.0029724	-0.0061049	-0.0020287
An17g00770.Aspni5_57261	-0.005065	-0.0035019	-0.0057588	-0.0032569	0.0075959	0.001191	0.0087002	0.00021194	-0.0025032	0.0077707
An17g00760.Aspni5_192619	0.0018086	-0.0018711	0.010797	-0.0015779	-0.0026894	-0.0084111	-0.0020968	-0.0082652	-0.0004216	-0.0014027
An17g00750.Aspni5_213970	-0.0022715	0.002341	-0.0052743	-0.00049142	0.0087145	0.0014221	0.0036154	-0.0044595	-0.0003419	0.0029695
An17g00740	-0.002058	-0.002984	-0.0050899	-0.00438	0.008911	0.0098756	-0.0066428	0.0079057	0.0034147	0.008927
An17g00720.Aspni5_54887	0.0031311	-0.002601	0.0095436	0.0014093	-0.0049921	-0.00056099	-0.0070599	2.8773e-06	-0.0058207	0.001872
An17g00710.Aspni5_192711	0.0011834	-0.0025706	-0.002552	-0.0010259	0.0019826	-0.0041471	-0.0032818	0.0015847	-0.00073807	0.0027283
An17g00690.Aspni5_192903	0.0034073	0.0019615	0.0067352	0.0002904	-0.0016911	-0.0010009	-0.0032477	-0.0027205	-0.0017186	-0.0010918
An17g00680.Aspni5_132324	0.001241	-0.001125	-0.0013163	-0.0032914	0.0032881	-0.0053159	0.0068964	-0.0022709	0.0059707	0.006507
An17g00670.Aspni5_54886	0.0022698	0.0020038	0.00361	0.0036856	0.0010488	-0.00051668	0.00054606	-0.0010735	0.002767	0.0024813
An17g00660.Aspni5_192625	0.0068299	-0.0037188	-0.011925	-1.7662e-05	-0.0088212	-0.0034103	0.0010881	-0.00081633	0.0038678	-0.010627
An17g00650.Aspni5_193009	0.0054309	0.0032733	0.0079834	-0.01276	-7.9092e-05	0.0027211	0.0069528	0.0019519	0.0053787	0.0083283
An17g00640.Aspni5_192694	-0.0044704	0.009129	-0.0021249	-0.013826	-0.0018395	0.0022445	-0.0041131	0.0051338	-0.011487	0.013783
An17g00630.Aspni5_213962	-0.0003894	-0.0036583	-0.0023752	0.0019739	0.0039703	0.0053699	-0.00245	-0.0006176	0.002773	0.002446
An17g00620.Aspni5_45103	0.011665	0.0040399	-0.0087898	0.0032054	0.0057637	-0.0064196	-0.0080171	0.0033805	-0.0073698	-0.0053049
An17g00610.Aspni5_45102	0.0030347	-0.0037125	-0.0015785	-0.0075151	-0.0018006	-0.013203	-0.0049524	-0.0010452	0.0028868	-0.00059593
An17g00600.Aspni5_45101	0.0025536	-0.00073063	0.001685	-0.0039682	0.0033224	0.0033169	-0.0052626	0.01134	-0.0065572	-0.0009675
An17g00590.Aspni5_45100	0.0066192	-0.0062747	0.0022037	-0.0080394	0.0004256	-0.0062015	0.0036527	-0.010379	-0.0038172	-0.011806
An17g00580.Aspni5_136740	-0.012098	-0.012629	-0.012308	0.0035026	-0.012394	-0.040181	-0.0019975	-0.011293	-0.0029973	0.001152
An17g00570.Aspni5_54884	6.4665e-05	0.0015565	0.002317	0.0060096	0.0020369	-0.0050027	-0.002553	-0.00069105	0.0018094	0.0065188
An17g00560.Aspni5_213957	-0.00041355	-0.00022	0.0067989	0.0028931	-0.00067575	0.00023121	-0.0011198	-0.0023168	0.00032177	0.0010309
An17g00550	-0.00058179	0.0046233	-0.00021393	-4.467e-05	-0.0044241	-0.0038855	-0.0071442	0.0078507	0.00056354	0.0039646
An17g00540.Aspni5_45093	-0.0021581	0.0017836	0.0021896	0.0044636	0.0068466	-0.00048509	0.0054978	-0.0026902	0.0040435	0.0077794
An17g00530.Aspni5_213953	-0.001718	0.0028629	0.005092	0.0064929	0.0062255	-0.0023444	0.0051227	-0.002579	0.0071381	0.0068914
An17g00520.Aspni5_129891	0.0094172	0.0065092	-0.037894	0.0012397	-0.016947	0.021979	0.011515	-0.013548	0.0093503	0.008077
An17g00510	0.018665	0.0019835	-0.047137	-0.0030232	-0.026088	0.020162	0.013672	-0.013004	-0.0052	0.015088
An17g00500.Aspni5_45091	0.0030813	0.00070517	-0.000595	0.0027325	-0.0019436	-0.0027815	0.0026973	-0.0055003	0.014534	0.013403
An17g00490	0.01249	-0.0089599	0.0035803	-0.0046926	0.0088508	-0.0054489	-0.00033877	0.0049077	0.015224	0.0096106
An17g00480	0.0051588	0.0023411	-0.012911	-0.0022397	0.0074097	0.015838	-0.012515	0.012126	-0.0085142	0.0035187
An17g00470.Aspni5_192970	0.00080081	-0.00022517	0.0024621	0.00083725	0.0046171	-0.0028719	0.0013288	-0.0014543	-0.0015816	-0.0049891
An17g00460	0.00045397	0.00093899	0.00071524	0.0017454	-0.0028062	-0.0011138	0.0010439	0.00040682	0.0019947	-0.001251
An17g00450	0.00050314	-0.00039472	0.0012243	-0.00038905	0.0021316	-0.0034665	-9.2612e-05	-0.0022584	0.0020778	0.00093524
An17g00440.Aspni5_122685	0.0011019	0.00055886	-0.012199	-0.0028761	0.025645	0.017363	-0.0013807	0.0016143	-0.00068793	0.0095211
An17g00430.Aspni5_141094	0.014333	-0.0025978	-0.0067385	0.0023554	-0.0011479	-0.014743	0.010071	0.01532	0.010025	0.0026656
An17g00420.Aspni5_45088	0.0014751	-0.0033972	0.0075411	0.0052181	-0.0092113	-0.0021971	-0.02327	-0.0032779	-0.0087456	0.0027924
An17g00410.Aspni5_45087	-0.0013477	0.0025839	-0.0031188	0.002686	-0.00066994	-0.0058008	-0.0097707	-0.010446	-0.0010667	0.0079557
An17g00400.Aspni5_45086	0.0009833	0.00028623	0.0035426	0.00053015	-0.0025244	-0.0031755	-0.0039375	-0.0029365	-0.0018779	0.00044761
An17g00390.Aspni5_213950	0.0041575	-0.0024209	0.001207	0.0012656	-0.0096002	-0.0082375	0.0042164	-0.0028428	0.0057468	-0.0020056
An17g00380.Aspni5_122919	0.0046824	-0.0070645	0.0013665	-0.013366	0.00066632	-0.0006694	-0.0078743	-0.0067527	0.018703	0.022702
An17g00370.Aspni5_213947	-0.0036423	0.0019309	0.0041132	0.0035567	-0.0001549	0.00096565	0.0036055	-0.0017901	0.003419	0.001244
An17g00360	-0.0027128	0.0020537	0.0036464	0.0012011	0.0013134	-3.9825e-05	-0.0007279	0.00096378	0.003839	0.0010781
An17g00350.Aspni5_45082	0.0066598	0.0094917	-0.0027792	-0.013253	0.01382	-0.0062646	-0.014778	-0.0060512	0.020436	-0.0059836
An17g00340.Aspni5_204381	0.00062111	0.021422	0.006882	-0.027392	0.018813	0.015188	-0.010703	-0.020772	0.0056775	-0.0076577
An17g00330.Aspni5_213943	-0.0027897	0.0005756	-0.0019709	-0.001202	0.01032	0.0022401	0.0049625	0.0019471	0.0038759	0.011759
An17g00320.Aspni5_50998	0.0011747	0.0026905	0.0038145	0.0021261	0.0017673	-0.0018204	0.0032504	0.0018765	0.0064159	0.0049559
An17g00310.Aspni5_213941	0.00080755	-0.00018379	-0.0029746	0.00084807	0.009271	-0.0041222	0.0057117	0.0010135	0.003004	0.0069685
An17g00300.Aspni5_50997	0.0090897	0.013613	-0.033583	-0.0034433	-0.024328	0.017051	0.005211	0.001495	0.013846	-0.00098207
An17g00290.Aspni5_119891	0.00030668	0.0015735	-0.00063455	-0.00085837	0.0074451	-0.00022194	0.010286	-0.0048353	0.0027654	0.0043052
An17g00280.Aspni5_50995	0.0037086	-0.001008	0.0035553	0.0028672	-0.00096751	-0.000589	-0.0027855	0.00095623	1.4031e-05	0.0011036
An17g00270.Aspni5_213937	0.00044357	-0.00084276	0.0041138	-0.00072473	-0.0028049	-0.0018821	-0.004009	-0.00077717	-0.0053041	0.0012299
An17g00260.Aspni5_57253	0.003681	0.00090134	0.0028286	-0.0038079	-0.0039226	-0.0040673	-0.0024862	0.0014675	-0.005381	-0.0034181
An17g00250.Aspni5_50992	0.00326	0.0023376	0.0015626	0.00012419	0.0053599	-0.0055778	0.0014548	-0.00020617	-0.001009	0.005083
An17g00240.Aspni5_57252	0.0022685	3.7e-06	-0.003762	0.0020614	0.0067947	-0.0049085	0.0026336	-0.0017162	0.001055	0.0045595
An17g00230.Aspni5_45070	0.012747	0.0029118	-0.0013691	-0.00055289	0.00715	-0.0094793	0.0051953	0.0040494	-0.0080444	0.0050787
An17g00220	0.004547	0.0021329	0.0071463	0.0024538	0.0033648	-0.003817	-0.0015833	-0.00042709	0.00097769	-5.7903e-05
An17g00210.Aspni5_54874	-0.0010462	-0.0016662	0.013004	-0.00074917	-0.0010406	0.0064816	-0.0012233	-0.010445	-0.0066554	0.0077571
An17g00180.Aspni5_122135	0.0065689	0.0010726	0.0087582	0.00033218	-0.0015337	0.0019883	-0.0021508	0.0031195	-0.0063627	-0.00030657
An17g00170.Aspni5_213924	-9.9876e-05	0.0023662	-0.00019523	-0.0017778	0.0088082	-0.0017823	0.0070814	4.3453e-05	0.0012954	0.0064577
An17g00160	0.013857	-0.0075589	-0.003836	-0.0047276	0.0048278	4.3397e-05	-0.003136	0.0027032	-0.00012716	-0.0041763
An17g00150.Aspni5_45066	0.010889	-0.0058462	-0.0014156	-0.0043892	0.0098572	0.0008565	-0.0038334	-0.00036776	0.0014414	-0.0012411
An17g00140.Aspni5_45065	0.0086736	0.0026766	0.0026867	0.0026614	0.00081332	-0.0025812	-0.0023884	-0.0048303	0.0081158	0.003659
An17g00130.Aspni5_192784	0.0074569	0.00067254	-0.00064119	0.0022276	-0.00019206	-0.0049753	-0.0028198	0.00010076	0.0054435	0.0010528
An17g00120.Aspni5_192820	0.0075825	0.00095613	-0.016462	0.0090018	-0.014274	-0.0075976	0.0052253	-0.0053051	0.013881	-0.0018518
An17g00100	0.0011267	-0.0040385	-0.0036881	-0.004697	0.0064152	-0.00033535	-0.0095233	-0.0033808	-0.0058635	0.01394
An17g00090.Aspni5_204359	0.0026519	-0.0019178	-0.00073265	-0.0020299	-0.0037558	-0.00039524	-9.0208e-05	0.00043263	-0.0022407	-0.0017152
An17g00070.Aspni5_45061	-0.0038468	-0.0088553	0.016375	0.0029081	0.0047488	-0.00041097	-0.0095863	0.012162	0.019283	-0.0050383
An17g00060	-0.0034071	-0.0086448	0.010268	0.0021257	0.0082996	0.00047792	-0.0071427	0.0098181	0.011389	-0.0075546
An17g00050	-0.0012112	0.0008791	-0.00047137	-0.0016002	0.0029245	0.0028064	-0.0027185	0.0014567	0.0057456	-0.0027793
An17g00040	-0.0031996	-0.0089603	0.0036711	0.0017775	0.0076989	0.0011835	-0.005908	0.006781	0.0049581	-0.0023998
An17g00030	-0.0032273	-0.007324	0.002628	0.0032948	0.0087827	0.00027737	-0.003852	0.0085273	0.0060508	-0.0027601
An17g00020	-0.003487	-0.007539	-0.0013883	0.00057059	0.0094477	-6.5959e-05	-0.0029567	0.0049377	0.0026574	-0.00038986
An17g00010.Aspni5_204355	0.0020884	0.0047065	0.019444	0.0084783	-7.6485e-05	0.014693	-0.0098489	-0.0035042	-0.017852	0.0079309
An16g09330	0.0043489	-0.0036451	-0.0051069	-0.005517	0.0048257	-0.0016531	-0.0067259	0.0023922	0.0021819	-0.002992
An16g09320.Aspni5_51231	0.0027435	-0.00084478	-0.0014097	0.00064543	0.0026023	-0.0016309	-0.0054752	0.0031148	-0.00021307	0.00074939
An16g09310.Aspni5_193846	0.0038041	-0.0014636	-0.0054268	-0.0047294	0.0030937	-0.0023456	-0.013778	0.0015419	-0.00019769	-0.0025264
An16g09300.Aspni5_45447	0.0027132	0.0024388	0.0025759	0.0022297	-0.0010766	-0.0023449	-0.0015718	0.0036355	0.00019262	-0.00043811
An16g09290.Aspni5_193822	0.0050102	-0.00052482	0.0021865	-0.0011162	-0.0034156	-0.0026173	-0.0053913	-0.00066175	-0.0042885	-0.0023332
An16g09280	0.0055868	-0.0021505	-0.0028035	-0.0098364	5.6739e-05	-0.00034616	-0.011509	0.00016698	-0.0019632	-0.0045499
An16g09270.Aspni5_193941	0.0029626	0.00019912	0.00071638	0.0014942	-0.0018965	-0.0029034	-0.0046422	0.0032168	-0.0017966	-0.001366
An16g09260.Aspni5_55041	0.00025054	-0.0027501	-0.0059449	0.005237	0.002175	-0.0045843	-0.0019311	-0.0021595	0.00076206	0.0042321
An16g09255	0.00073964	-0.0027981	-0.0063191	0.002802	0.0023371	-0.003674	-0.0040309	-0.0011214	0.0001466	0.0035999
An16g09250.Aspni5_193626	-0.00033526	0.0028626	0.0054609	-0.0051588	0.00089583	-0.0021262	-0.0071036	-0.0015682	-0.0011603	0.0040518
An16g09240.Aspni5_194066	-0.00059012	-0.0026844	-0.0010839	-0.00092426	0.0020722	-0.0030057	-0.0052778	-0.0011628	-0.00020577	0.0043793
An16g09230.Aspni5_214434	0.0040204	0.0029136	0.0051566	0.00061982	0.0012342	-0.0036059	-0.0048719	0.002855	0.0026268	-0.0010527
An16g09220	0.008173	-0.0060798	0.010214	-0.0091486	0.014316	-0.0032997	-0.02145	0.0058546	-0.0086004	-0.0090903
An16g09210.Aspni5_204865	0.0046808	0.00020569	0.006887	0.0025647	-0.0041239	-0.0040043	-0.00012112	-0.0013185	0.00012575	0.00039485
An16g09200.Aspni5_193773	0.0019958	-0.003549	0.0035869	0.001837	-0.0029067	-0.0024665	-0.0045059	-0.00091047	-0.0038433	-0.00015608
An16g09190.Aspni5_214441	0.002467	-0.00083425	0.0047742	0.00018569	0.00046762	-0.0035342	0.00077418	-0.0043318	-0.0025494	-0.0020005
An16g09180.Aspni5_214443	0.00081536	0.0010566	0.0069914	-0.0067279	-0.0014773	-0.00064908	-0.00055861	-0.0052973	0.0022182	-0.0039488
An16g09170.Aspni5_121949	0.0029447	0.0011071	0.003843	-0.00060944	0.00086234	-0.0023243	-0.0050613	0.002313	-0.00069329	-0.00045819
[truncated: 12,505 more rows]

## Sheet: Cluster1-gProfiler
source	term_name	term_id	adjusted_p_value	negative_log10_of_adjusted_p_value	term_size	query_size	intersection_size	effective_domain_size	intersections
GO:MF	oxidoreductase activity, acting on a heme group of donors, oxygen as acceptor	GO:0016676	7.4e-08	7.13073	10	1465	10	13013	AN02G09930,AN02G01720,AN09G03990,AN08G01550,AN07G07390,AN04G01560,AN11G10200,AN14G04170,AN04G07180,AN16G03410
GO:MF	oxidoreductase activity, acting on a heme group of donors	GO:0016675	7.4e-08	7.13073	10	1465	10	13013	AN02G09930,AN02G01720,AN09G03990,AN08G01550,AN07G07390,AN04G01560,AN11G10200,AN14G04170,AN04G07180,AN16G03410
GO:MF	heme-copper terminal oxidase activity	GO:0015002	7.4e-08	7.13073	10	1465	10	13013	AN02G09930,AN02G01720,AN09G03990,AN08G01550,AN07G07390,AN04G01560,AN11G10200,AN14G04170,AN04G07180,AN16G03410
GO:MF	cytochrome-c oxidase activity	GO:0004129	7.4e-08	7.13073	10	1465	10	13013	AN02G09930,AN02G01720,AN09G03990,AN08G01550,AN07G07390,AN04G01560,AN11G10200,AN14G04170,AN04G07180,AN16G03410
GO:MF	structural constituent of ribosome	GO:0003735	1.70829e-05	4.76744	124	2465	49	13013	AN02G07130,AN04G05950,AN08G00950,AN18G02990,AN07G09250,AN08G04150,AN09G06140,AN04G00210,AN08G10500,AN02G03110,AN14G04960,AN07G06540,AN02G09190,AN07G03460,AN17G01270,AN11G06810,AN14G06310,AN18G05630,AN02G11570,AN04G07330,AN13G01000,AN01G09120,AN04G06190,AN18G03230,AN07G09070,AN18G04490,AN08G05500,AN04G01970,AN15G00770,AN14G06300,AN14G03920,AN16G05440,AN04G02010,AN11G11170,AN08G00330,AN04G09065,AN0…
GO:MF	amino acid transmembrane transporter activity	GO:0015171	0.000551489	3.25846	71	854	17	13013	AN02G09540,AN05G01440,AN03G00230,AN16G01200,AN05G01740,AN02G08340,AN03G01590,AN16G06090,AN03G00430,AN12G09900,AN09G01090,AN09G05010,AN09G06730,AN18G00120,AN01G13290,AN16G01920,AN01G09730
GO:MF	transmembrane transporter activity	GO:0022857	0.00116975	2.93191	459	226	23	13013	AN15G07190,AN14G02610,AN16G06580,AN02G03540,AN08G05670,AN02G11050,AN02G09540,AN16G00240,AN05G01440,AN03G00230,AN16G01200,AN05G02470,AN08G04670,AN02G13460,AN18G00400,AN05G01740,AN08G03200,AN02G08340,AN14G03990,AN12G05750,AN03G01590,AN11G07780,AN16G06090
GO:MF	organic acid transmembrane transporter activity	GO:0005342	0.00152973	2.81539	84	854	18	13013	AN02G09540,AN16G00240,AN05G01440,AN03G00230,AN16G01200,AN05G01740,AN02G08340,AN03G01590,AN16G06090,AN03G00430,AN12G09900,AN09G01090,AN09G05010,AN09G06730,AN18G00120,AN01G13290,AN16G01920,AN01G09730
GO:MF	carboxylic acid transmembrane transporter activity	GO:0046943	0.00152973	2.81539	84	854	18	13013	AN02G09540,AN16G00240,AN05G01440,AN03G00230,AN16G01200,AN05G01740,AN02G08340,AN03G01590,AN16G06090,AN03G00430,AN12G09900,AN09G01090,AN09G05010,AN09G06730,AN18G00120,AN01G13290,AN16G01920,AN01G09730
GO:MF	anion transmembrane transporter activity	GO:0008509	0.00159665	2.79679	109	854	21	13013	AN08G05670,AN02G09540,AN16G00240,AN05G01440,AN03G00230,AN16G01200,AN05G01740,AN02G08340,AN03G01590,AN16G06090,AN03G00430,AN15G04600,AN12G09900,AN09G01090,AN09G05010,AN09G06730,AN18G00120,AN01G13290,AN16G01920,AN01G07860,AN01G09730
GO:MF	transporter activity	GO:0005215	0.00238443	2.62262	514	226	24	13013	AN15G07190,AN14G02610,AN16G06580,AN02G03540,AN08G05670,AN02G11050,AN02G09540,AN16G00240,AN05G01440,AN03G00230,AN16G01200,AN05G02470,AN04G08250,AN08G04670,AN02G13460,AN18G00400,AN05G01740,AN08G03200,AN02G08340,AN14G03990,AN12G05750,AN03G01590,AN11G07780,AN16G06090
GO:MF	electron transfer activity	GO:0009055	0.00267396	2.57284	41	2429	20	13013	AN11G02430,AN02G09930,AN02G01720,AN09G03990,AN08G01550,AN07G07390,AN04G01560,AN11G10200,AN14G04170,AN01G12100,AN04G07180,AN08G06550,AN16G03410,AN04G01200,AN01G12210,AN09G06300,AN04G05220,AN03G03660,AN11G04370,AN17G01110
GO:MF	NADH dehydrogenase (quinone) activity	GO:0050136	0.00462509	2.33488	27	2429	15	13013	AN08G04240,AN11G09350,AN02G05880,AN12G00220,AN04G00060,AN14G00060,AN11G06200,AN15G00690,AN02G09730,AN08G04910,AN08G10690,AN07G04180,AN02G11200,AN11G09390,AN17G01110
GO:MF	NADH dehydrogenase (ubiquinone) activity	GO:0008137	0.00462509	2.33488	27	2429	15	13013	AN08G04240,AN11G09350,AN02G05880,AN12G00220,AN04G00060,AN14G00060,AN11G06200,AN15G00690,AN02G09730,AN08G04910,AN08G10690,AN07G04180,AN02G11200,AN11G09390,AN17G01110
GO:MF	organic anion transmembrane transporter activity	GO:0008514	0.00529819	2.27587	92	611	15	13013	AN02G09540,AN16G00240,AN05G01440,AN03G00230,AN16G01200,AN05G01740,AN02G08340,AN03G01590,AN16G06090,AN03G00430,AN12G09900,AN09G01090,AN09G05010,AN09G06730,AN18G00120
GO:MF	NADH dehydrogenase activity	GO:0003954	0.00824526	2.0838	28	2429	15	13013	AN08G04240,AN11G09350,AN02G05880,AN12G00220,AN04G00060,AN14G00060,AN11G06200,AN15G00690,AN02G09730,AN08G04910,AN08G10690,AN07G04180,AN02G11200,AN11G09390,AN17G01110
GO:MF	oxidoreductase activity, acting on NAD(P)H	GO:0016651	0.00831238	2.08027	57	2429	24	13013	AN08G04240,AN11G02430,AN11G06670,AN01G08570,AN15G06810,AN11G09350,AN12G02850,AN15G05770,AN09G06300,AN01G03570,AN02G05880,AN12G00220,AN04G00060,AN14G00060,AN11G06200,AN15G00690,AN02G09730,AN08G04910,AN08G10690,AN07G04180,AN03G03660,AN02G11200,AN11G09390,AN17G01110
GO:MF	structural molecule activity	GO:0005198	0.00978448	2.00946	194	2531	61	13013	AN15G03800,AN02G07130,AN04G05950,AN08G00950,AN18G02990,AN07G09250,AN08G04150,AN02G11910,AN09G06140,AN04G00210,AN16G08550,AN08G10500,AN02G03110,AN14G04960,AN01G10880,AN07G06540,AN02G09190,AN07G03460,AN17G01270,AN11G06810,AN14G06310,AN18G05630,AN02G11570,AN04G07330,AN13G01000,AN01G09120,AN04G06190,AN18G03230,AN07G09070,AN18G04490,AN08G05500,AN04G01970,AN15G00770,AN14G06300,AN14G03920,AN16G05440,AN0…
GO:MF	oxygen carrier activity	GO:0005344	0.0290757	1.53647	2	146	2	13013	AN18G01780,AN14G02460
GO:MF	ion transmembrane transporter activity	GO:0015075	0.0340114	1.46838	243	1640	51	13013	AN15G07190,AN08G05670,AN02G09540,AN16G00240,AN05G01440,AN03G00230,AN16G01200,AN05G01740,AN08G03200,AN02G08340,AN03G01590,AN16G06090,AN03G00430,AN15G04600,AN01G03790,AN12G09900,AN09G01090,AN02G04160,AN09G05010,AN09G06730,AN18G00120,AN01G13290,AN16G01920,AN01G07860,AN01G09730,AN04G08190,AN02G14410,AN02G09930,AN02G01720,AN09G03990,AN08G01550,AN01G01180,AN07G07390,AN04G01560,AN11G10200,AN17G02220,AN1…
GO:BP	mitochondrial translation	GO:0032543	5.73e-22	21.2415	72	2443	54	12803	AN04G03110,AN12G00130,AN17G01955,AN09G03870,AN04G05950,AN08G00950,AN18G02990,AN07G09250,AN08G04150,AN08G04470,AN01G03650,AN09G06140,AN04G00210,AN02G03110,AN14G04960,AN07G06540,AN04G02550,AN15G00420,AN07G03460,AN09G05980,AN17G01270,AN11G06810,AN02G01740,AN14G06310,AN18G05630,AN02G11570,AN13G01000,AN01G09120,AN01G10990,AN04G03060,AN04G06190,AN18G03230,AN07G09070,AN18G04490,AN08G05500,AN15G00770,AN1…
GO:BP	mitochondrial gene expression	GO:0140053	6.26e-21	20.2037	81	2554	58	12803	AN04G03110,AN12G00130,AN17G01955,AN09G03870,AN04G05950,AN08G00950,AN18G02990,AN07G09250,AN08G04150,AN08G04470,AN01G03650,AN09G06140,AN04G00210,AN02G03110,AN14G04960,AN07G06540,AN04G02550,AN15G00420,AN07G03460,AN09G05980,AN17G01270,AN11G06810,AN02G01740,AN14G06310,AN18G05630,AN02G11570,AN13G01000,AN01G09120,AN01G10990,AN04G03060,AN04G06190,AN18G03230,AN07G09070,AN18G04490,AN08G05500,AN15G00770,AN1…
GO:BP	mitochondrion organization	GO:0007005	4.11e-12	11.3862	144	2542	70	12803	AN08G04880,AN11G01630,AN08G03480,AN04G01160,AN09G03940,AN07G10010,AN02G01720,AN08G01550,AN11G10200,AN15G01270,AN02G08900,AN08G00950,AN12G04940,AN02G01750,AN02G03770,AN09G06030,AN11G00550,AN16G02470,AN11G09985,AN16G03410,AN04G02460,AN04G00200,AN16G08550,AN14G01570,AN11G05700,AN02G06850,AN11G10140,AN04G01200,AN01G10880,AN01G12210,AN04G02570,AN02G11800,AN01G08860,AN14G00220,AN16G06400,AN08G01650,AN0…
GO:BP	organonitrogen compound biosynthetic process	GO:1901566	3.61705e-06	5.44165	701	2482	197	12803	AN03G04520,AN02G06420,AN09G00170,AN02G10320,AN18G01670,AN12G09640,AN07G10040,AN03G03640,AN02G07130,AN15G01990,AN04G01340,AN02G06150,AN11G01630,AN04G05100,AN16G01830,AN18G02550,AN03G04280,AN11G02430,AN16G02500,AN11G09700,AN09G03940,AN11G09510,AN05G00220,AN04G01320,AN04G01750,AN15G03420,AN07G09920,AN03G04810,AN01G11930,AN15G00550,AN02G10750,AN04G08190,AN04G03110,AN12G01270,AN08G02260,AN11G09780,AN0…
GO:BP	cytochrome complex assembly	GO:0017004	5.01116e-06	5.30006	21	1905	15	12803	AN08G04880,AN02G01720,AN08G01550,AN15G01270,AN02G08900,AN02G13360,AN11G09985,AN16G03410,AN04G00200,AN14G01570,AN02G06850,AN04G01200,AN04G02570,AN04G01535,AN05G00080
GO:BP	mitochondrial respiratory chain complex assembly	GO:0033108	1.02698e-05	4.98844	24	2281	17	12803	AN08G04880,AN02G01720,AN08G01550,AN15G01270,AN02G08900,AN11G09985,AN16G03410,AN04G00200,AN14G01570,AN02G06850,AN11G10140,AN04G01200,AN04G02570,AN01G08860,AN05G00080,AN07G07510,AN16G00850
GO:BP	ATP metabolic process	GO:0046034	0.000152906	3.81558	52	2543	27	12803	AN18G01670,AN16G01830,AN04G08190,AN08G02260,AN02G09930,AN07G07390,AN14G04170,AN16G05420,AN01G00100,AN08G06550,AN18G06250,AN16G08550,AN04G01200,AN01G10880,AN01G08860,AN06G00380,AN12G08610,AN04G05220,AN08G04910,AN11G11290,AN01G04930,AN16G07290,AN07G06560,AN12G04950,AN15G01710,AN02G06240,AN11G09400
GO:BP	establishment of protein localization to mitochondrion	GO:0072655	0.000165827	3.78035	42	2447	23	12803	AN02G08900,AN12G04940,AN02G01750,AN09G06030,AN11G00550,AN16G02470,AN04G02460,AN01G12210,AN02G11800,AN14G00220,AN08G01650,AN07G02770,AN08G04080,AN09G02730,AN13G00670,AN08G07360,AN07G06340,AN02G04260,AN15G00190,AN02G10740,AN01G06370,AN02G01360,AN04G04970
GO:BP	protein localization to mitochondrion	GO:0070585	0.000165827	3.78035	42	2447	23	12803	AN02G08900,AN12G04940,AN02G01750,AN09G06030,AN11G00550,AN16G02470,AN04G02460,AN01G12210,AN02G11800,AN14G00220,AN08G01650,AN07G02770,AN08G04080,AN09G02730,AN13G00670,AN08G07360,AN07G06340,AN02G04260,AN15G00190,AN02G10740,AN01G06370,AN02G01360,AN04G04970
GO:BP	respiratory chain complex IV assembly	GO:0008535	0.000224517	3.64875	11	1628	9	12803	AN08G04880,AN02G01720,AN08G01550,AN15G01270,AN02G13360,AN11G09985,AN16G03410,AN04G00200,AN04G02570
GO:BP	purine ribonucleoside triphosphate metabolic process	GO:0009205	0.000255618	3.59241	56	2543	28	12803	AN18G01670,AN16G01830,AN04G08190,AN08G02260,AN02G09930,AN07G07390,AN14G04170,AN16G05420,AN01G00100,AN08G06550,AN18G06250,AN16G08550,AN04G01200,AN01G10880,AN01G08860,AN06G00380,AN12G08610,AN08G00300,AN04G05220,AN08G04910,AN11G11290,AN01G04930,AN16G07290,AN07G06560,AN12G04950,AN15G01710,AN02G06240,AN11G09400
GO:BP	amide biosynthetic process	GO:0043604	0.00037203	3.42942	328	2538	102	12803	AN02G06420,AN03G03640,AN02G07130,AN15G01990,AN04G01340,AN05G00220,AN15G03420,AN15G00550,AN04G03110,AN12G01270,AN09G01130,AN12G00130,AN07G02180,AN17G01955,AN07G09530,AN09G03870,AN17G00770,AN15G02000,AN04G05950,AN08G00950,AN18G02990,AN01G00100,AN16G05350,AN07G09250,AN08G04150,AN08G04470,AN01G03650,AN02G11910,AN09G06140,AN04G00210,AN15G00890,AN08G10500,AN02G03110,AN14G04960,AN07G06540,AN02G09190,AN0…
GO:BP	small molecule biosynthetic process	GO:0044283	0.000388195	3.41095	322	2191	90	12803	AN04G04370,AN03G04520,AN09G00170,AN02G10320,AN03G03770,AN18G01670,AN12G09640,AN01G10030,AN15G01990,AN12G09940,AN04G01340,AN02G06150,AN11G09930,AN11G01630,AN16G01830,AN18G02550,AN01G14200,AN07G01960,AN03G04280,AN10G00530,AN16G02500,AN11G09700,AN09G03940,AN11G09510,AN07G05610,AN04G01320,AN04G01750,AN07G09920,AN01G11930,AN02G10750,AN18G04520,AN08G02260,AN11G09780,AN09G01130,AN04G06490,AN18G06760,AN0…
GO:BP	generation of precursor metabolites and energy	GO:0006091	0.00043952	3.35702	132	2429	49	12803	AN06G00990,AN18G01670,AN16G01830,AN11G02430,AN08G02260,AN02G09930,AN02G01720,AN09G03990,AN18G06760,AN08G01550,AN07G02160,AN07G07390,AN09G03870,AN04G01560,AN11G10200,AN15G01270,AN02G08900,AN02G04330,AN11G07190,AN08G05580,AN14G04170,AN01G12100,AN04G07180,AN16G05420,AN01G00100,AN11G06590,AN08G06550,AN16G02570,AN18G06250,AN11G09985,AN14G04960,AN04G01200,AN01G12210,AN01G08860,AN06G00380,AN09G06300,AN1…
GO:BP	peptide biosynthetic process	GO:0043043	0.000466195	3.33143	288	2478	90	12803	AN03G03640,AN02G07130,AN05G00220,AN15G03420,AN15G00550,AN04G03110,AN12G01270,AN12G00130,AN17G01955,AN09G03870,AN17G00770,AN04G05950,AN08G00950,AN18G02990,AN07G09250,AN08G04150,AN08G04470,AN01G03650,AN09G06140,AN04G00210,AN15G00890,AN08G10500,AN02G03110,AN14G04960,AN07G06540,AN02G09190,AN04G02550,AN15G00420,AN07G03460,AN09G05980,AN17G01270,AN11G06810,AN02G01740,AN14G06310,AN01G13920,AN18G05630,AN1…
GO:BP	protein targeting to mitochondrion	GO:0006626	0.000482466	3.31653	41	2447	22	12803	AN02G08900,AN12G04940,AN02G01750,AN09G06030,AN11G00550,AN16G02470,AN04G02460,AN01G12210,AN14G00220,AN08G01650,AN07G02770,AN08G04080,AN09G02730,AN13G00670,AN08G07360,AN07G06340,AN02G04260,AN15G00190,AN02G10740,AN01G06370,AN02G01360,AN04G04970
GO:BP	mitochondrial transport	GO:0006839	0.000487615	3.31192	53	2447	26	12803	AN02G08900,AN12G04940,AN02G01750,AN18G04220,AN09G06030,AN11G00550,AN16G02470,AN01G03650,AN04G02460,AN01G12210,AN14G00220,AN08G01650,AN07G02770,AN08G04080,AN09G02730,AN13G00670,AN04G02140,AN12G07510,AN08G07360,AN07G06340,AN02G04260,AN15G00190,AN02G10740,AN01G06370,AN02G01360,AN04G04970
GO:BP	translation	GO:0006412	0.000562571	3.24982	273	2478	86	12803	AN02G07130,AN15G03420,AN15G00550,AN04G03110,AN12G01270,AN12G00130,AN17G01955,AN09G03870,AN17G00770,AN04G05950,AN08G00950,AN18G02990,AN07G09250,AN08G04150,AN08G04470,AN01G03650,AN09G06140,AN04G00210,AN15G00890,AN08G10500,AN02G03110,AN14G04960,AN07G06540,AN02G09190,AN04G02550,AN15G00420,AN07G03460,AN09G05980,AN17G01270,AN11G06810,AN02G01740,AN14G06310,AN18G05630,AN11G10090,AN02G11570,AN04G07330,AN1…
GO:BP	ribonucleoside triphosphate metabolic process	GO:0009199	0.000639512	3.19415	58	2543	28	12803	AN18G01670,AN16G01830,AN04G08190,AN08G02260,AN02G09930,AN07G07390,AN14G04170,AN16G05420,AN01G00100,AN08G06550,AN18G06250,AN16G08550,AN04G01200,AN01G10880,AN01G08860,AN06G00380,AN12G08610,AN08G00300,AN04G05220,AN08G04910,AN11G11290,AN01G04930,AN16G07290,AN07G06560,AN12G04950,AN15G01710,AN02G06240,AN11G09400
GO:BP	mitochondrial membrane organization	GO:0007006	0.000800382	3.0967	30	2510	18	12803	AN02G08900,AN09G06030,AN04G02460,AN16G08550,AN11G05700,AN01G10880,AN02G11800,AN14G00220,AN08G06540,AN15G01020,AN17G01120,AN14G04090,AN08G07360,AN07G06340,AN02G04260,AN08G10610,AN02G10740,AN15G00340
GO:BP	inner mitochondrial membrane organization	GO:0007007	0.000806826	3.09322	16	2363	12	12803	AN02G08900,AN09G06030,AN04G02460,AN16G08550,AN11G05700,AN01G10880,AN08G06540,AN14G04090,AN07G06340,AN02G04260,AN08G10610,AN02G10740
GO:BP	cellular amide metabolic process	GO:0043603	0.00088291	3.05408	387	2478	113	12803	AN02G06420,AN01G14960,AN03G03640,AN02G07130,AN15G01990,AN04G01340,AN01G03790,AN15G05120,AN05G00220,AN15G03420,AN15G00550,AN04G03110,AN12G01270,AN09G01130,AN12G00130,AN07G02180,AN17G01955,AN07G09530,AN09G03870,AN16G02970,AN17G00770,AN15G02000,AN04G05950,AN05G00410,AN08G00950,AN18G02990,AN01G00100,AN16G05350,AN07G09250,AN08G04150,AN08G04470,AN01G03650,AN02G11910,AN09G06140,AN04G00210,AN15G00890,AN0…
GO:BP	purine ribonucleotide metabolic process	GO:0009150	0.000948119	3.02314	105	2543	42	12803	AN02G06420,AN18G01670,AN16G01830,AN04G08190,AN04G00610,AN08G02260,AN13G04000,AN02G09930,AN07G02180,AN12G00320,AN07G07390,AN07G09530,AN14G04170,AN16G05420,AN01G00100,AN08G06550,AN18G06250,AN02G11910,AN02G04020,AN16G08550,AN04G01200,AN01G10880,AN01G08860,AN06G00380,AN15G00570,AN14G00490,AN01G13920,AN12G08610,AN02G14520,AN08G00300,AN04G05220,AN08G04910,AN11G11290,AN01G04930,AN16G07290,AN17G01670,AN0…
GO:BP	peptide metabolic process	GO:0006518	0.00116598	2.93331	310	2478	94	12803	AN03G03640,AN02G07130,AN05G00220,AN15G03420,AN15G00550,AN04G03110,AN12G01270,AN12G00130,AN17G01955,AN09G03870,AN17G00770,AN04G05950,AN08G00950,AN18G02990,AN07G09250,AN08G04150,AN08G04470,AN01G03650,AN09G06140,AN04G00210,AN15G00890,AN08G10500,AN02G03110,AN14G04960,AN07G06540,AN02G09190,AN04G02550,AN15G00420,AN07G03460,AN09G05980,AN17G01270,AN11G06810,AN02G01740,AN14G06310,AN01G13920,AN18G05630,AN1…
GO:BP	purine nucleotide metabolic process	GO:0006163	0.00127183	2.89557	106	2543	42	12803	AN02G06420,AN18G01670,AN16G01830,AN04G08190,AN04G00610,AN08G02260,AN13G04000,AN02G09930,AN07G02180,AN12G00320,AN07G07390,AN07G09530,AN14G04170,AN16G05420,AN01G00100,AN08G06550,AN18G06250,AN02G11910,AN02G04020,AN16G08550,AN04G01200,AN01G10880,AN01G08860,AN06G00380,AN15G00570,AN14G00490,AN01G13920,AN12G08610,AN02G14520,AN08G00300,AN04G05220,AN08G04910,AN11G11290,AN01G04930,AN16G07290,AN17G01670,AN0…
GO:BP	mitochondrial respiratory chain complex IV assembly	GO:0033617	0.00145531	2.83704	10	1628	8	12803	AN08G04880,AN02G01720,AN08G01550,AN15G01270,AN11G09985,AN16G03410,AN04G00200,AN04G02570
GO:BP	purine nucleoside triphosphate metabolic process	GO:0009144	0.00150302	2.82304	60	2543	28	12803	AN18G01670,AN16G01830,AN04G08190,AN08G02260,AN02G09930,AN07G07390,AN14G04170,AN16G05420,AN01G00100,AN08G06550,AN18G06250,AN16G08550,AN04G01200,AN01G10880,AN01G08860,AN06G00380,AN12G08610,AN08G00300,AN04G05220,AN08G04910,AN11G11290,AN01G04930,AN16G07290,AN07G06560,AN12G04950,AN15G01710,AN02G06240,AN11G09400
GO:BP	amino acid transmembrane transport	GO:0003333	0.0018015	2.74437	71	854	17	12803	AN02G09540,AN05G01440,AN03G00230,AN16G01200,AN05G01740,AN02G08340,AN03G01590,AN16G06090,AN03G00430,AN12G09900,AN09G01090,AN09G05010,AN09G06730,AN18G00120,AN01G13290,AN16G01920,AN01G09730
GO:BP	ribose phosphate metabolic process	GO:0019693	0.00184271	2.73454	125	2543	47	12803	AN02G06420,AN18G01670,AN16G01830,AN11G02040,AN07G03850,AN04G08190,AN04G00610,AN08G02260,AN13G04000,AN02G09930,AN07G02180,AN12G00320,AN07G07390,AN07G09530,AN14G04170,AN16G05420,AN02G02910,AN01G00100,AN08G06570,AN08G06550,AN18G06250,AN02G11910,AN02G04020,AN16G08550,AN04G01200,AN01G10880,AN01G08860,AN06G00380,AN15G00570,AN14G00490,AN01G13920,AN12G08610,AN02G14520,AN02G12140,AN08G00300,AN04G05220,AN0…
GO:BP	mitochondrial transmembrane transport	GO:1990542	0.00199036	2.70107	32	2447	18	12803	AN12G04940,AN02G01750,AN18G04220,AN11G00550,AN16G02470,AN01G03650,AN04G02460,AN08G01650,AN07G02770,AN13G00670,AN04G02140,AN12G07510,AN08G07360,AN07G06340,AN15G00190,AN01G06370,AN02G01360,AN04G04970
GO:BP	nucleoside triphosphate metabolic process	GO:0009141	0.00209725	2.67835	64	2543	29	12803	AN18G01670,AN16G01830,AN04G08190,AN08G02260,AN02G09930,AN07G07390,AN09G05840,AN14G04170,AN16G05420,AN01G00100,AN08G06550,AN18G06250,AN16G08550,AN04G01200,AN01G10880,AN01G08860,AN06G00380,AN12G08610,AN08G00300,AN04G05220,AN08G04910,AN11G11290,AN01G04930,AN16G07290,AN07G06560,AN12G04950,AN15G01710,AN02G06240,AN11G09400
GO:BP	sulfur compound biosynthetic process	GO:0044272	0.00240147	2.61952	65	2513	29	12803	AN02G06420,AN02G10320,AN03G03640,AN15G01990,AN11G01630,AN11G09700,AN11G09510,AN04G01750,AN08G02700,AN02G10750,AN11G09780,AN07G02180,AN07G09530,AN15G02000,AN01G00100,AN02G11910,AN02G04020,AN17G02280,AN15G05770,AN01G13920,AN18G05680,AN17G00630,AN11G09790,AN16G07520,AN14G00930,AN02G02520,AN02G09720,AN07G07560,AN16G04600
GO:BP	ribonucleotide metabolic process	GO:0009259	0.00256077	2.59163	112	2543	43	12803	AN02G06420,AN18G01670,AN16G01830,AN04G08190,AN04G00610,AN08G02260,AN13G04000,AN02G09930,AN07G02180,AN12G00320,AN07G07390,AN07G09530,AN14G04170,AN16G05420,AN02G02910,AN01G00100,AN08G06550,AN18G06250,AN02G11910,AN02G04020,AN16G08550,AN04G01200,AN01G10880,AN01G08860,AN06G00380,AN15G00570,AN14G00490,AN01G13920,AN12G08610,AN02G14520,AN08G00300,AN04G05220,AN08G04910,AN11G11290,AN01G04930,AN16G07290,AN1…
GO:BP	anion transmembrane transport	GO:0098656	0.00339584	2.46905	106	854	21	12803	AN02G09540,AN16G00240,AN05G01440,AN03G00230,AN16G01200,AN05G01740,AN02G08340,AN03G01590,AN16G06090,AN03G00430,AN15G04600,AN12G09900,AN09G01090,AN02G04160,AN09G05010,AN09G06730,AN18G00120,AN01G13290,AN16G01920,AN01G07860,AN01G09730
GO:BP	aerobic respiration	GO:0009060	0.00358168	2.44591	63	2060	25	12803	AN06G00990,AN02G09930,AN18G06760,AN07G02160,AN07G07390,AN09G03870,AN11G10200,AN15G01270,AN02G08900,AN02G04330,AN11G07190,AN08G05580,AN14G04170,AN11G06590,AN08G06550,AN16G02570,AN11G09985,AN14G04960,AN04G01200,AN01G08860,AN15G00930,AN04G07330,AN11G11280,AN04G05220,AN08G10340
GO:BP	purine ribonucleoside triphosphate biosynthetic process	GO:0009206	0.00394715	2.40372	35	2543	19	12803	AN18G01670,AN16G01830,AN04G08190,AN08G02260,AN16G05420,AN01G00100,AN18G06250,AN16G08550,AN01G10880,AN06G00380,AN12G08610,AN08G00300,AN01G04930,AN16G07290,AN07G06560,AN12G04950,AN15G01710,AN02G06240,AN11G09400
GO:BP	small molecule metabolic process	GO:0044281	0.00402386	2.39536	777	2229	182	12803	AN06G00990,AN04G04370,AN04G03200,AN03G04520,AN12G09340,AN02G06420,AN01G14960,AN07G01290,AN09G00170,AN02G10320,AN08G05640,AN08G05610,AN03G03770,AN18G01670,AN12G09640,AN08G09710,AN18G04630,AN01G10030,AN15G01990,AN12G00160,AN08G08840,AN12G09940,AN07G08390,AN04G01340,AN04G06380,AN02G06150,AN14G03820,AN01G03790,AN11G09930,AN05G01620,AN11G01630,AN18G04410,AN08G11610,AN16G01830,AN18G02550,AN01G14200,AN0…
GO:BP	electron transport chain	GO:0022900	0.00474007	2.32422	49	2429	23	12803	AN11G02430,AN02G09930,AN02G01720,AN09G03990,AN08G01550,AN07G07390,AN04G01560,AN11G10200,AN14G04170,AN01G12100,AN04G07180,AN08G06550,AN04G01200,AN01G12210,AN01G08860,AN09G06300,AN02G05880,AN04G05220,AN08G04910,AN11G11290,AN03G03660,AN11G09390,AN17G01110
GO:BP	amino acid transport	GO:0006865	0.00484728	2.3145	76	854	17	12803	AN02G09540,AN05G01440,AN03G00230,AN16G01200,AN05G01740,AN02G08340,AN03G01590,AN16G06090,AN03G00430,AN12G09900,AN09G01090,AN09G05010,AN09G06730,AN18G00120,AN01G13290,AN16G01920,AN01G09730
GO:BP	organic acid biosynthetic process	GO:0016053	0.00503447	2.29805	213	2188	62	12803	AN04G04370,AN03G04520,AN09G00170,AN18G01670,AN01G10030,AN15G01990,AN12G09940,AN04G01340,AN02G06150,AN16G01830,AN18G02550,AN01G14200,AN07G01960,AN16G02500,AN11G09700,AN09G03940,AN11G09510,AN04G01750,AN07G09920,AN01G11930,AN02G10750,AN08G02260,AN11G09780,AN09G01130,AN18G06760,AN04G00430,AN02G00890,AN16G02970,AN15G02000,AN08G05580,AN01G00060,AN05G00410,AN13G01080,AN16G05420,AN01G00100,AN16G02520,AN0…
GO:BP	carboxylic acid biosynthetic process	GO:0046394	0.00503447	2.29805	213	2188	62	12803	AN04G04370,AN03G04520,AN09G00170,AN18G01670,AN01G10030,AN15G01990,AN12G09940,AN04G01340,AN02G06150,AN16G01830,AN18G02550,AN01G14200,AN07G01960,AN16G02500,AN11G09700,AN09G03940,AN11G09510,AN04G01750,AN07G09920,AN01G11930,AN02G10750,AN08G02260,AN11G09780,AN09G01130,AN18G06760,AN04G00430,AN02G00890,AN16G02970,AN15G02000,AN08G05580,AN01G00060,AN05G00410,AN13G01080,AN16G05420,AN01G00100,AN16G02520,AN0…
GO:BP	purine-containing compound biosynthetic process	GO:0072522	0.00513319	2.28961	73	2543	31	12803	AN02G06420,AN18G01670,AN16G01830,AN04G01750,AN04G08190,AN08G02260,AN07G02180,AN12G00320,AN07G09530,AN02G00890,AN16G05420,AN01G00100,AN04G06690,AN18G06250,AN02G11910,AN02G04020,AN16G08550,AN01G10880,AN06G00380,AN15G00570,AN01G13920,AN12G08610,AN02G14520,AN08G00300,AN01G04930,AN16G07290,AN07G06560,AN12G04950,AN15G01710,AN02G06240,AN11G09400
GO:BP	transmembrane transport	GO:0055085	0.00625093	2.20406	813	618	67	12803	AN15G07190,AN14G02610,AN16G06580,AN02G03540,AN04G08300,AN09G00660,AN08G05670,AN15G04060,AN02G11050,AN01G11450,AN02G09540,AN16G00240,AN05G01440,AN13G01760,AN03G00230,AN16G01200,AN05G02470,AN04G08250,AN08G04670,AN05G01840,AN02G13460,AN18G00400,AN05G01740,AN08G03200,AN02G08340,AN14G03990,AN12G05750,AN17G01710,AN08G08710,AN03G01590,AN11G07780,AN16G06090,AN11G07820,AN14G02450,AN13G03220,AN10G00800,AN1…
GO:BP	ATP biosynthetic process	GO:0006754	0.00633519	2.19824	33	2543	18	12803	AN18G01670,AN16G01830,AN04G08190,AN08G02260,AN16G05420,AN01G00100,AN18G06250,AN16G08550,AN01G10880,AN06G00380,AN12G08610,AN01G04930,AN16G07290,AN07G06560,AN12G04950,AN15G01710,AN02G06240,AN11G09400
GO:BP	organic acid metabolic process	GO:0006082	0.00640853	2.19324	458	1854	100	12803	AN06G00990,AN04G04370,AN03G04520,AN12G09340,AN02G06420,AN01G14960,AN09G00170,AN08G05640,AN08G05610,AN18G01670,AN08G09710,AN18G04630,AN01G10030,AN15G01990,AN12G00160,AN08G08840,AN12G09940,AN07G08390,AN04G01340,AN04G06380,AN02G06150,AN18G04410,AN16G01830,AN18G02550,AN01G14200,AN07G01960,AN16G02500,AN11G09700,AN11G02040,AN09G03940,AN11G09510,AN05G00220,AN04G01750,AN07G09920,AN09G04250,AN08G02700,AN0…
GO:BP	cellular respiration	GO:0045333	0.00664936	2.17722	79	2229	30	12803	AN06G00990,AN02G09930,AN09G03990,AN18G06760,AN07G02160,AN07G07390,AN09G03870,AN11G10200,AN15G01270,AN02G08900,AN02G04330,AN11G07190,AN08G05580,AN14G04170,AN11G06590,AN08G06550,AN16G02570,AN11G09985,AN14G04960,AN04G01200,AN01G08860,AN15G00930,AN04G07330,AN11G11280,AN02G05880,AN04G05220,AN08G10340,AN08G04910,AN11G11290,AN17G01670
GO:BP	protein refolding	GO:0042026	0.00672052	2.1726	7	1406	6	12803	AN08G03480,AN01G13350,AN12G04940,AN02G01750,AN02G03770,AN11G00550
GO:BP	oxoacid metabolic process	GO:0043436	0.00680784	2.16699	453	1854	99	12803	AN06G00990,AN04G04370,AN03G04520,AN12G09340,AN01G14960,AN09G00170,AN08G05640,AN08G05610,AN18G01670,AN08G09710,AN18G04630,AN01G10030,AN15G01990,AN12G00160,AN08G08840,AN12G09940,AN07G08390,AN04G01340,AN04G06380,AN02G06150,AN18G04410,AN16G01830,AN18G02550,AN01G14200,AN07G01960,AN16G02500,AN11G09700,AN11G02040,AN09G03940,AN11G09510,AN05G00220,AN04G01750,AN07G09920,AN09G04250,AN08G02700,AN01G11930,AN0…
GO:BP	purine-containing compound metabolic process	GO:0072521	0.00680925	2.1669	123	2543	45	12803	AN02G06420,AN18G01670,AN16G01830,AN04G01750,AN04G08190,AN04G00610,AN08G02260,AN13G04000,AN02G09930,AN07G02180,AN12G00320,AN07G07390,AN07G09530,AN02G00890,AN14G04170,AN16G05420,AN01G00100,AN08G06550,AN04G06690,AN18G06250,AN02G11910,AN02G04020,AN16G08550,AN04G01200,AN01G10880,AN01G08860,AN06G00380,AN15G00570,AN14G00490,AN01G13920,AN12G08610,AN02G14520,AN08G00300,AN04G05220,AN08G04910,AN11G11290,AN0…
GO:BP	purine ribonucleotide biosynthetic process	GO:0009152	0.0070399	2.15243	64	2543	28	12803	AN02G06420,AN18G01670,AN16G01830,AN04G08190,AN08G02260,AN07G02180,AN12G00320,AN07G09530,AN16G05420,AN01G00100,AN18G06250,AN02G11910,AN02G04020,AN16G08550,AN01G10880,AN06G00380,AN15G00570,AN01G13920,AN12G08610,AN02G14520,AN08G00300,AN01G04930,AN16G07290,AN07G06560,AN12G04950,AN15G01710,AN02G06240,AN11G09400
GO:BP	purine nucleotide biosynthetic process	GO:0006164	0.0070399	2.15243	64	2543	28	12803	AN02G06420,AN18G01670,AN16G01830,AN04G08190,AN08G02260,AN07G02180,AN12G00320,AN07G09530,AN16G05420,AN01G00100,AN18G06250,AN02G11910,AN02G04020,AN16G08550,AN01G10880,AN06G00380,AN15G00570,AN01G13920,AN12G08610,AN02G14520,AN08G00300,AN01G04930,AN16G07290,AN07G06560,AN12G04950,AN15G01710,AN02G06240,AN11G09400
GO:BP	cofactor biosynthetic process	GO:0051188	0.00806416	2.09344	133	2046	41	12803	AN02G06420,AN18G01670,AN07G10040,AN03G03640,AN15G01990,AN11G09930,AN16G01830,AN03G04280,AN11G02430,AN11G09700,AN07G05610,AN05G00220,AN08G02700,AN08G02260,AN09G01130,AN04G06490,AN07G02180,AN07G09530,AN15G02000,AN01G08640,AN16G05420,AN01G00100,AN11G06590,AN12G03940,AN16G05350,AN18G06250,AN02G11910,AN01G08500,AN01G04250,AN18G02970,AN06G00380,AN09G06300,AN04G00170,AN02G01540,AN15G00930,AN03G03460,AN1…
GO:BP	carboxylic acid transmembrane transport	GO:1905039	0.00839151	2.07616	87	854	18	12803	AN02G09540,AN16G00240,AN05G01440,AN03G00230,AN16G01200,AN05G01740,AN02G08340,AN03G01590,AN16G06090,AN03G00430,AN12G09900,AN09G01090,AN09G05010,AN09G06730,AN18G00120,AN01G13290,AN16G01920,AN01G09730
GO:BP	organic acid transmembrane transport	GO:1903825	0.00839151	2.07616	87	854	18	12803	AN02G09540,AN16G00240,AN05G01440,AN03G00230,AN16G01200,AN05G01740,AN02G08340,AN03G01590,AN16G06090,AN03G00430,AN12G09900,AN09G01090,AN09G05010,AN09G06730,AN18G00120,AN01G13290,AN16G01920,AN01G09730
GO:BP	ubiquinone metabolic process	GO:0006743	0.00867203	2.06188	14	1712	9	12803	AN11G09930,AN07G05610,AN04G06490,AN11G06590,AN01G08500,AN09G06300,AN04G00170,AN02G01540,AN15G00930
GO:BP	ubiquinone biosynthetic process	GO:0006744	0.00867203	2.06188	14	1712	9	12803	AN11G09930,AN07G05610,AN04G06490,AN11G06590,AN01G08500,AN09G06300,AN04G00170,AN02G01540,AN15G00930
GO:BP	quinone biosynthetic process	GO:1901663	0.00867203	2.06188	14	1712	9	12803	AN11G09930,AN07G05610,AN04G06490,AN11G06590,AN01G08500,AN09G06300,AN04G00170,AN02G01540,AN15G00930
GO:BP	quinone metabolic process	GO:1901661	0.00867203	2.06188	14	1712	9	12803	AN11G09930,AN07G05610,AN04G06490,AN11G06590,AN01G08500,AN09G06300,AN04G00170,AN02G01540,AN15G00930
GO:BP	carboxylic acid metabolic process	GO:0019752	0.00898775	2.04635	439	1854	96	12803	AN06G00990,AN04G04370,AN03G04520,AN12G09340,AN01G14960,AN09G00170,AN18G01670,AN08G09710,AN18G04630,AN01G10030,AN15G01990,AN12G00160,AN08G08840,AN12G09940,AN07G08390,AN04G01340,AN04G06380,AN02G06150,AN18G04410,AN16G01830,AN18G02550,AN01G14200,AN07G01960,AN16G02500,AN11G09700,AN11G02040,AN09G03940,AN11G09510,AN04G01750,AN07G09920,AN09G04250,AN08G02700,AN01G11930,AN01G09740,AN08G09450,AN02G10750,AN0…
GO:BP	cellular amino acid biosynthetic process	GO:0008652	0.00978407	2.00948	120	2142	39	12803	AN03G04520,AN09G00170,AN04G01340,AN02G06150,AN18G02550,AN16G02500,AN11G09700,AN09G03940,AN11G09510,AN04G01750,AN07G09920,AN01G11930,AN02G10750,AN11G09780,AN18G06760,AN04G00430,AN02G00890,AN16G02970,AN08G05580,AN05G00410,AN13G01080,AN01G00100,AN16G02520,AN04G06690,AN01G06560,AN16G04170,AN13G00550,AN04G02580,AN17G02280,AN01G08800,AN14G03280,AN15G05770,AN03G04330,AN17G00630,AN11G09790,AN04G01610,AN1…
GO:BP	ribonucleoside triphosphate biosynthetic process	GO:0009201	0.0113934	1.94334	37	2543	19	12803	AN18G01670,AN16G01830,AN04G08190,AN08G02260,AN16G05420,AN01G00100,AN18G06250,AN16G08550,AN01G10880,AN06G00380,AN12G08610,AN08G00300,AN01G04930,AN16G07290,AN07G06560,AN12G04950,AN15G01710,AN02G06240,AN11G09400
GO:BP	purine nucleoside triphosphate biosynthetic process	GO:0009145	0.0113934	1.94334	37	2543	19	12803	AN18G01670,AN16G01830,AN04G08190,AN08G02260,AN16G05420,AN01G00100,AN18G06250,AN16G08550,AN01G10880,AN06G00380,AN12G08610,AN08G00300,AN01G04930,AN16G07290,AN07G06560,AN12G04950,AN15G01710,AN02G06240,AN11G09400
GO:BP	nucleoside triphosphate biosynthetic process	GO:0009142	0.011495	1.93949	40	2543	20	12803	AN18G01670,AN16G01830,AN04G08190,AN08G02260,AN09G05840,AN16G05420,AN01G00100,AN18G06250,AN16G08550,AN01G10880,AN06G00380,AN12G08610,AN08G00300,AN01G04930,AN16G07290,AN07G06560,AN12G04950,AN15G01710,AN02G06240,AN11G09400
GO:BP	ribonucleotide biosynthetic process	GO:0009260	0.0126202	1.89893	69	2543	29	12803	AN02G06420,AN18G01670,AN16G01830,AN04G08190,AN08G02260,AN07G02180,AN12G00320,AN07G09530,AN16G05420,AN02G02910,AN01G00100,AN18G06250,AN02G11910,AN02G04020,AN16G08550,AN01G10880,AN06G00380,AN15G00570,AN01G13920,AN12G08610,AN02G14520,AN08G00300,AN01G04930,AN16G07290,AN07G06560,AN12G04950,AN15G01710,AN02G06240,AN11G09400
GO:BP	branched-chain amino acid biosynthetic process	GO:0009082	0.012813	1.89235	18	1658	10	12803	AN03G04520,AN09G00170,AN02G06150,AN18G02550,AN09G03940,AN11G09510,AN04G00430,AN16G04170,AN04G02580,AN14G03280
GO:BP	pyruvate metabolic process	GO:0006090	0.0141881	1.84807	23	1853	12	12803	AN18G01670,AN12G00160,AN16G01830,AN08G02260,AN07G02180,AN07G09530,AN16G05420,AN01G00100,AN18G06250,AN02G11910,AN06G00380,AN12G08610
GO:BP	ATP synthesis coupled proton transport	GO:0015986	0.0260647	1.58395	14	2543	10	12803	AN04G08190,AN16G08550,AN01G10880,AN01G04930,AN16G07290,AN07G06560,AN12G04950,AN15G01710,AN02G06240,AN11G09400
GO:BP	energy coupled proton transport, down electrochemical gradient	GO:0015985	0.0260647	1.58395	14	2543	10	12803	AN04G08190,AN16G08550,AN01G10880,AN01G04930,AN16G07290,AN07G06560,AN12G04950,AN15G01710,AN02G06240,AN11G09400
GO:BP	energy derivation by oxidation of organic compounds	GO:0015980	0.0268823	1.57053	88	2229	31	12803	AN06G00990,AN02G09930,AN09G03990,AN18G06760,AN07G02160,AN07G07390,AN09G03870,AN11G10200,AN15G01270,AN02G08900,AN02G04330,AN11G07190,AN08G05580,AN14G04170,AN11G06590,AN08G06550,AN16G02570,AN11G09985,AN14G04960,AN04G01200,AN01G08860,AN15G00930,AN04G07330,AN11G11280,AN12G08610,AN02G05880,AN04G05220,AN08G10340,AN08G04910,AN11G11290,AN17G01670
GO:BP	protein import into mitochondrial intermembrane space	GO:0045041	0.0295756	1.52907	6	2447	6	12803	AN12G04940,AN11G00550,AN16G02470,AN04G02460,AN07G02770,AN04G04970
GO:BP	organic acid transport	GO:0015849	0.0317556	1.49818	97	611	15	12803	AN02G09540,AN16G00240,AN05G01440,AN03G00230,AN16G01200,AN05G01740,AN02G08340,AN03G01590,AN16G06090,AN03G00430,AN12G09900,AN09G01090,AN09G05010,AN09G06730,AN18G00120
GO:BP	carboxylic acid transport	GO:0046942	0.0317556	1.49818	97	611	15	12803	AN02G09540,AN16G00240,AN05G01440,AN03G00230,AN16G01200,AN05G01740,AN02G08340,AN03G01590,AN16G06090,AN03G00430,AN12G09900,AN09G01090,AN09G05010,AN09G06730,AN18G00120
GO:BP	ribose phosphate biosynthetic process	GO:0046390	0.0326523	1.48609	72	2543	29	12803	AN02G06420,AN18G01670,AN16G01830,AN04G08190,AN08G02260,AN07G02180,AN12G00320,AN07G09530,AN16G05420,AN02G02910,AN01G00100,AN18G06250,AN02G11910,AN02G04020,AN16G08550,AN01G10880,AN06G00380,AN15G00570,AN01G13920,AN12G08610,AN02G14520,AN08G00300,AN01G04930,AN16G07290,AN07G06560,AN12G04950,AN15G01710,AN02G06240,AN11G09400
GO:BP	pigment biosynthetic process	GO:0046148	0.0375038	1.42593	30	2005	14	12803	AN07G10040,AN11G02430,AN11G09700,AN04G01750,AN12G00320,AN02G00890,AN01G08640,AN04G06690,AN01G04250,AN18G02970,AN09G06300,AN15G00570,AN01G13920,AN15G02690
GO:BP	drug metabolic process	GO:0017144	0.0467901	1.32985	238	2543	72	12803	AN06G00990,AN04G04370,AN12G09340,AN01G01820,AN02G10320,AN08G05610,AN18G01670,AN12G09640,AN08G09710,AN15G01990,AN03G05660,AN19G00100,AN11G01630,AN08G09030,AN16G01830,AN03G04280,AN01G01550,AN04G01750,AN08G02700,AN04G08190,AN08G02260,AN02G09930,AN02G04900,AN18G06760,AN07G02160,AN12G00320,AN07G07390,AN09G03870,AN08G06370,AN11G07190,AN16G02970,AN15G02000,AN08G05580,AN05G00410,AN14G04170,AN16G05420,AN0…
GO:BP	cellular amino acid metabolic process	GO:0006520	0.0481925	1.31702	254	2290	70	12803	AN04G04370,AN03G04520,AN01G14960,AN09G00170,AN08G09710,AN18G04630,AN12G00160,AN08G08840,AN04G01340,AN04G06380,AN02G06150,AN18G04410,AN18G02550,AN16G02500,AN11G09700,AN09G03940,AN11G09510,AN04G01750,AN07G09920,AN09G04250,AN08G02700,AN01G11930,AN02G10750,AN04G03110,AN18G04520,AN12G01270,AN11G09780,AN03G01120,AN18G06760,AN04G00430,AN02G00890,AN17G00910,AN16G02970,AN04G00990,AN08G05580,AN05G00410,AN1…
GO:CC	mitochondrial part	GO:0044429	8.51e-37	36.0699	314	2513	165	12674	AN08G04880,AN11G09930,AN08G03480,AN11G02430,AN04G01160,AN09G03940,AN07G05610,AN01G05570,AN03G04810,AN04G08190,AN04G06490,AN02G09930,AN02G01720,AN09G03990,AN01G13600,AN18G06760,AN08G01550,AN12G00130,AN07G02180,AN07G02160,AN07G07390,AN11G10200,AN15G01270,AN02G08900,AN02G04330,AN08G05580,AN04G05950,AN08G00950,AN02G13360,AN12G04940,AN12G07550,AN04G07180,AN02G01750,AN18G02990,AN18G04220,AN02G03770,AN0…
GO:CC	mitochondrial protein complex	GO:0098798	2.59e-30	29.5868	129	2543	88	12674	AN04G08190,AN02G09930,AN02G01720,AN18G06760,AN07G02180,AN07G07390,AN11G10200,AN02G04330,AN08G05580,AN04G05950,AN08G00950,AN02G01750,AN18G02990,AN01G00100,AN08G06550,AN07G09250,AN08G04150,AN02G11910,AN04G02460,AN09G06140,AN04G00210,AN16G08550,AN02G03110,AN11G05700,AN14G04960,AN04G01200,AN01G10880,AN07G06540,AN01G12210,AN07G03460,AN09G05980,AN01G08860,AN14G00220,AN17G01270,AN11G06810,AN08G01650,AN1…
GO:CC	mitochondrion	GO:0005739	1.51e-29	28.8206	594	2515	239	12674	AN08G04880,AN03G03640,AN12G00160,AN11G09930,AN04G00220,AN02G04160,AN08G03480,AN11G02430,AN04G01160,AN09G03940,AN07G05610,AN01G05570,AN07G09920,AN03G04810,AN02G10750,AN04G08190,AN16G05090,AN04G03110,AN08G02260,AN07G10010,AN04G06490,AN02G09930,AN02G01720,AN09G03990,AN01G13600,AN18G06760,AN18G04000,AN08G01550,AN07G07780,AN12G00130,AN07G02180,AN17G01955,AN07G02160,AN07G07390,AN09G03870,AN11G10200,AN1…
GO:CC	mitochondrial matrix	GO:0005759	3.69e-25	24.4334	117	2513	77	12674	AN08G03480,AN09G03940,AN18G06760,AN07G02180,AN07G02160,AN02G04330,AN08G05580,AN04G05950,AN08G00950,AN12G04940,AN02G01750,AN18G02990,AN02G03770,AN01G00100,AN11G06590,AN11G00550,AN16G02570,AN07G09250,AN08G04150,AN02G11910,AN09G06140,AN04G00210,AN14G01570,AN02G03110,AN14G04960,AN07G06540,AN01G12210,AN07G03460,AN09G05980,AN01G08860,AN17G01270,AN02G03760,AN11G06810,AN09G06300,AN02G01540,AN15G00930,AN1…
GO:CC	mitochondrial ribosome	GO:0005761	1.28e-20	19.8934	50	2443	42	12674	AN02G04330,AN04G05950,AN08G00950,AN18G02990,AN07G09250,AN08G04150,AN09G06140,AN04G00210,AN02G03110,AN14G04960,AN07G06540,AN07G03460,AN09G05980,AN17G01270,AN11G06810,AN14G06310,AN18G05630,AN02G11570,AN13G01000,AN01G09120,AN09G04110,AN04G06190,AN18G03230,AN07G09070,AN18G04490,AN08G05500,AN15G00770,AN14G06300,AN05G00080,AN11G11170,AN04G09065,AN08G01660,AN07G09550,AN02G06040,AN04G03900,AN03G04620,AN0…
GO:CC	organellar ribosome	GO:0000313	1.28e-20	19.8934	50	2443	42	12674	AN02G04330,AN04G05950,AN08G00950,AN18G02990,AN07G09250,AN08G04150,AN09G06140,AN04G00210,AN02G03110,AN14G04960,AN07G06540,AN07G03460,AN09G05980,AN17G01270,AN11G06810,AN14G06310,AN18G05630,AN02G11570,AN13G01000,AN01G09120,AN09G04110,AN04G06190,AN18G03230,AN07G09070,AN18G04490,AN08G05500,AN15G00770,AN14G06300,AN05G00080,AN11G11170,AN04G09065,AN08G01660,AN07G09550,AN02G06040,AN04G03900,AN03G04620,AN0…
GO:CC	mitochondrial inner membrane	GO:0005743	5.71e-20	19.2433	140	2543	80	12674	AN08G04880,AN11G09930,AN11G02430,AN04G01160,AN07G05610,AN01G05570,AN03G04810,AN04G08190,AN04G06490,AN02G09930,AN02G01720,AN09G03990,AN01G13600,AN12G00130,AN07G07390,AN11G10200,AN15G01270,AN02G08900,AN02G04330,AN02G13360,AN12G07550,AN04G07180,AN02G01750,AN18G04220,AN02G03770,AN11G06590,AN09G06030,AN08G06550,AN11G09985,AN04G02460,AN04G00200,AN16G08550,AN01G08500,AN11G05700,AN02G06850,AN01G12590,AN0…
GO:CC	organelle inner membrane	GO:0019866	6.51e-18	17.1865	148	2543	80	12674	AN08G04880,AN11G09930,AN11G02430,AN04G01160,AN07G05610,AN01G05570,AN03G04810,AN04G08190,AN04G06490,AN02G09930,AN02G01720,AN09G03990,AN01G13600,AN12G00130,AN07G07390,AN11G10200,AN15G01270,AN02G08900,AN02G04330,AN02G13360,AN12G07550,AN04G07180,AN02G01750,AN18G04220,AN02G03770,AN11G06590,AN09G06030,AN08G06550,AN11G09985,AN04G02460,AN04G00200,AN16G08550,AN01G08500,AN11G05700,AN02G06850,AN01G12590,AN0…
GO:CC	mitochondrial membrane part	GO:0044455	1.37e-17	16.8641	111	2543	66	12674	AN08G04880,AN11G09930,AN11G02430,AN04G01160,AN07G05610,AN03G04810,AN04G08190,AN04G06490,AN02G09930,AN02G01720,AN09G03990,AN01G13600,AN12G00130,AN07G07390,AN11G10200,AN15G01270,AN04G07180,AN02G01750,AN02G03770,AN11G06590,AN09G06030,AN08G06550,AN04G02460,AN04G00200,AN16G08550,AN01G08500,AN11G05700,AN02G06850,AN04G01200,AN01G10880,AN04G02570,AN01G08860,AN14G00220,AN04G00170,AN15G00930,AN08G01650,AN0…
GO:CC	mitochondrial membrane	GO:0031966	2.83e-16	15.548	194	2543	93	12674	AN08G04880,AN11G09930,AN11G02430,AN04G01160,AN07G05610,AN01G05570,AN03G04810,AN04G08190,AN04G06490,AN02G09930,AN02G01720,AN09G03990,AN01G13600,AN12G00130,AN07G07390,AN11G10200,AN15G01270,AN02G08900,AN02G04330,AN02G13360,AN12G04940,AN12G07550,AN04G07180,AN02G01750,AN18G04220,AN02G03770,AN11G06590,AN09G06030,AN08G06550,AN11G09985,AN04G02460,AN04G00200,AN16G08550,AN01G08500,AN11G05700,AN02G06850,AN0…
GO:CC	mitochondrial envelope	GO:0005740	4.77e-16	15.3216	217	2543	100	12674	AN08G04880,AN11G09930,AN11G02430,AN04G01160,AN07G05610,AN01G05570,AN03G04810,AN04G08190,AN04G06490,AN02G09930,AN02G01720,AN09G03990,AN01G13600,AN08G01550,AN12G00130,AN07G07390,AN11G10200,AN15G01270,AN02G08900,AN02G04330,AN02G13360,AN12G04940,AN12G07550,AN04G07180,AN02G01750,AN18G04220,AN02G03770,AN11G06590,AN09G06030,AN08G06550,AN16G05350,AN16G02470,AN11G09985,AN16G03410,AN04G02460,AN04G00200,AN1…
GO:CC	organellar large ribosomal subunit	GO:0000315	9.89e-12	11.0046	28	2441	24	12674	AN04G05950,AN08G00950,AN18G02990,AN08G04150,AN09G06140,AN04G00210,AN02G03110,AN14G04960,AN07G03460,AN09G05980,AN17G01270,AN11G06810,AN14G06310,AN02G11570,AN04G06190,AN08G05500,AN14G06300,AN11G11170,AN04G09065,AN02G06040,AN04G03900,AN01G07430,AN18G02890,AN02G04300
GO:CC	mitochondrial large ribosomal subunit	GO:0005762	9.89e-12	11.0046	28	2441	24	12674	AN04G05950,AN08G00950,AN18G02990,AN08G04150,AN09G06140,AN04G00210,AN02G03110,AN14G04960,AN07G03460,AN09G05980,AN17G01270,AN11G06810,AN14G06310,AN02G11570,AN04G06190,AN08G05500,AN14G06300,AN11G11170,AN04G09065,AN02G06040,AN04G03900,AN01G07430,AN18G02890,AN02G04300
GO:CC	inner mitochondrial membrane protein complex	GO:0098800	4.05e-09	8.39235	48	2543	31	12674	AN04G08190,AN02G09930,AN02G01720,AN07G07390,AN11G10200,AN02G01750,AN08G06550,AN04G02460,AN16G08550,AN11G05700,AN04G01200,AN01G10880,AN01G08860,AN08G01650,AN08G06220,AN09G02730,AN13G00670,AN02G05880,AN04G05220,AN08G04910,AN11G11290,AN07G06340,AN01G04930,AN16G07290,AN02G10740,AN01G06370,AN12G04950,AN04G04970,AN15G01710,AN02G06240,AN11G09400
GO:CC	ribosomal subunit	GO:0044391	4.27e-09	8.36977	85	2465	44	12674	AN17G00770,AN04G05950,AN08G00950,AN18G02990,AN07G09250,AN08G04150,AN09G06140,AN04G00210,AN02G03110,AN14G04960,AN07G06540,AN07G03460,AN09G05980,AN17G01270,AN11G06810,AN14G06310,AN18G05630,AN02G11570,AN13G01000,AN01G09120,AN04G06190,AN18G03230,AN07G09070,AN18G04490,AN08G05500,AN15G00770,AN14G06300,AN14G03920,AN11G11170,AN08G00330,AN04G09065,AN08G01660,AN07G09550,AN02G06040,AN04G03900,AN03G04620,AN0…
GO:CC	integral component of mitochondrial inner membrane	GO:0031305	8.31e-09	8.08052	19	2373	17	12674	AN08G04880,AN11G02430,AN01G13600,AN15G01270,AN04G02460,AN04G00200,AN11G05700,AN02G06850,AN04G02570,AN04G00170,AN08G06220,AN07G02770,AN08G02450,AN01G14110,AN04G02140,AN08G10610,AN08G05900
GO:CC	intrinsic component of mitochondrial inner membrane	GO:0031304	4.57e-08	7.34047	20	2373	17	12674	AN08G04880,AN11G02430,AN01G13600,AN15G01270,AN04G02460,AN04G00200,AN11G05700,AN02G06850,AN04G02570,AN04G00170,AN08G06220,AN07G02770,AN08G02450,AN01G14110,AN04G02140,AN08G10610,AN08G05900
GO:CC	organelle envelope	GO:0031967	1.07e-07	6.97136	314	2543	109	12674	AN08G04880,AN11G09930,AN11G02430,AN04G01160,AN01G13350,AN07G05610,AN01G05570,AN03G04810,AN04G08190,AN04G06490,AN02G09930,AN02G01720,AN09G03990,AN01G13600,AN08G01550,AN12G00130,AN07G07390,AN11G10200,AN15G01270,AN02G08900,AN02G04330,AN02G13360,AN12G04940,AN12G07550,AN04G07180,AN02G01750,AN18G04220,AN02G03770,AN11G06590,AN09G06030,AN08G06550,AN16G05350,AN16G02470,AN11G09985,AN16G03410,AN04G02460,AN0…
GO:CC	envelope	GO:0031975	1.07e-07	6.97136	314	2543	109	12674	AN08G04880,AN11G09930,AN11G02430,AN04G01160,AN01G13350,AN07G05610,AN01G05570,AN03G04810,AN04G08190,AN04G06490,AN02G09930,AN02G01720,AN09G03990,AN01G13600,AN08G01550,AN12G00130,AN07G07390,AN11G10200,AN15G01270,AN02G08900,AN02G04330,AN02G13360,AN12G04940,AN12G07550,AN04G07180,AN02G01750,AN18G04220,AN02G03770,AN11G06590,AN09G06030,AN08G06550,AN16G05350,AN16G02470,AN11G09985,AN16G03410,AN04G02460,AN0…
GO:CC	integral component of mitochondrial membrane	GO:0032592	5.38e-07	6.26945	36	2373	23	12674	AN08G04880,AN11G02430,AN04G01160,AN01G13600,AN15G01270,AN04G02460,AN04G00200,AN11G05700,AN02G06850,AN04G02570,AN14G00220,AN04G00170,AN08G06220,AN01G03570,AN07G02770,AN08G02450,AN01G14110,AN03G03460,AN05G00080,AN04G02140,AN08G07360,AN08G10610,AN08G05900
GO:CC	intrinsic component of mitochondrial membrane	GO:0098573	1.16924e-06	5.9321	37	2373	23	12674	AN08G04880,AN11G02430,AN04G01160,AN01G13600,AN15G01270,AN04G02460,AN04G00200,AN11G05700,AN02G06850,AN04G02570,AN14G00220,AN04G00170,AN08G06220,AN01G03570,AN07G02770,AN08G02450,AN01G14110,AN03G03460,AN05G00080,AN04G02140,AN08G07360,AN08G10610,AN08G05900
GO:CC	organellar small ribosomal subunit	GO:0000314	5.6061e-06	5.25134	19	2443	15	12674	AN07G09250,AN07G06540,AN18G05630,AN13G01000,AN01G09120,AN18G03230,AN07G09070,AN18G04490,AN15G00770,AN08G01660,AN07G09550,AN03G04620,AN04G01650,AN01G03110,AN07G06570
GO:CC	mitochondrial small ribosomal subunit	GO:0005763	5.6061e-06	5.25134	19	2443	15	12674	AN07G09250,AN07G06540,AN18G05630,AN13G01000,AN01G09120,AN18G03230,AN07G09070,AN18G04490,AN15G00770,AN08G01660,AN07G09550,AN03G04620,AN04G01650,AN01G03110,AN07G06570
GO:CC	large ribosomal subunit	GO:0015934	8.71314e-06	5.05983	47	2465	26	12674	AN04G05950,AN08G00950,AN18G02990,AN08G04150,AN09G06140,AN04G00210,AN02G03110,AN14G04960,AN07G03460,AN09G05980,AN17G01270,AN11G06810,AN14G06310,AN02G11570,AN04G06190,AN08G05500,AN14G06300,AN11G11170,AN08G00330,AN04G09065,AN02G06040,AN04G03900,AN01G07430,AN18G02890,AN02G04300,AN12G04870
GO:CC	mitochondrial respirasome	GO:0005746	0.000184089	3.73497	19	2175	13	12674	AN02G09930,AN02G01720,AN09G03990,AN07G07390,AN11G10200,AN04G07180,AN08G06550,AN04G01200,AN01G08860,AN02G05880,AN04G05220,AN08G04910,AN11G11290
GO:CC	ribosome	GO:0005840	0.000576382	3.23929	174	2504	60	12674	AN02G07130,AN15G00550,AN02G04330,AN17G00770,AN04G05950,AN08G00950,AN18G02990,AN07G09250,AN08G04150,AN09G06140,AN04G00210,AN08G10500,AN02G03110,AN14G04960,AN07G06540,AN02G09190,AN07G03460,AN09G05980,AN17G01270,AN11G06810,AN14G06310,AN18G05630,AN02G11570,AN04G07330,AN13G01000,AN01G09120,AN09G04110,AN12G00470,AN04G06190,AN18G03230,AN07G09070,AN18G04490,AN08G05500,AN04G01970,AN15G00770,AN14G06300,AN1…
GO:CC	proton-transporting ATP synthase complex, coupling factor F(o)	GO:0045263	0.00338006	2.47108	9	2543	8	12674	AN04G08190,AN16G08550,AN01G10880,AN16G07290,AN07G06560,AN15G01710,AN02G06240,AN11G09400
GO:CC	extrinsic component of mitochondrial inner membrane	GO:0031314	0.00498186	2.30261	17	1831	10	12674	AN11G09930,AN07G05610,AN03G04810,AN04G06490,AN12G00130,AN02G03770,AN11G06590,AN01G08500,AN15G00930,AN11G06960
GO:CC	respiratory chain complex	GO:0098803	0.00633852	2.19801	18	2175	11	12674	AN02G09930,AN02G01720,AN07G07390,AN11G10200,AN08G06550,AN04G01200,AN01G08860,AN02G05880,AN04G05220,AN08G04910,AN11G11290
GO:CC	respirasome	GO:0070469	0.00800885	2.09643	25	2429	14	12674	AN02G09930,AN02G01720,AN09G03990,AN07G07390,AN11G10200,AN04G07180,AN08G06550,AN04G01200,AN01G08860,AN02G05880,AN04G05220,AN08G04910,AN11G11290,AN17G01110
GO:CC	proton-transporting ATP synthase complex	GO:0045259	0.00822537	2.08484	14	2543	10	12674	AN04G08190,AN16G08550,AN01G10880,AN01G04930,AN16G07290,AN07G06560,AN12G04950,AN15G01710,AN02G06240,AN11G09400
GO:CC	respiratory chain complex IV	GO:0045277	0.0133009	1.87612	4	1184	4	12674	AN02G09930,AN02G01720,AN07G07390,AN11G10200
GO:CC	mitochondrial respiratory chain complex IV	GO:0005751	0.0133009	1.87612	4	1184	4	12674	AN02G09930,AN02G01720,AN07G07390,AN11G10200
GO:CC	small ribosomal subunit	GO:0015935	0.0141218	1.85011	38	2443	18	12674	AN17G00770,AN07G09250,AN07G06540,AN18G05630,AN13G01000,AN01G09120,AN18G03230,AN07G09070,AN18G04490,AN15G00770,AN14G03920,AN08G01660,AN07G09550,AN03G04620,AN04G01650,AN01G03110,AN11G10630,AN07G06570
GO:CC	mitochondrial proton-transporting ATP synthase complex, coupling factor F(o)	GO:0000276	0.0150568	1.82227	8	2543	7	12674	AN04G08190,AN16G08550,AN01G10880,AN16G07290,AN15G01710,AN02G06240,AN11G09400
GO:CC	mitochondrial proton-transporting ATP synthase complex	GO:0005753	0.0296323	1.52824	13	2543	9	12674	AN04G08190,AN16G08550,AN01G10880,AN01G04930,AN16G07290,AN12G04950,AN15G01710,AN02G06240,AN11G09400
GO:CC	oxidoreductase complex	GO:1990204	0.0300571	1.52205	30	2175	14	12674	AN18G06760,AN07G02180,AN08G05580,AN01G00100,AN08G06550,AN02G11910,AN04G01200,AN15G07390,AN01G08860,AN11G11280,AN02G05880,AN04G05220,AN08G04910,AN11G11290
GO:CC	cytochrome complex	GO:0070069	0.0328585	1.48335	10	2002	7	12674	AN02G09930,AN02G01720,AN07G07390,AN11G10200,AN08G06550,AN04G01200,AN04G05220

## Sheet: Cluster2-gProfiler
source	term_name	term_id	adjusted_p_value	negative_log10_of_adjusted_p_value	term_size	query_size	intersection_size	effective_domain_size	intersections
GO:MF	oxidoreductase activity	GO:0016491	3.22e-14	13.4927	1351	1461	248	13013	AN01G01530,AN15G01590,AN09G02980,AN12G10680,AN12G02700,AN03G00530,AN14G05370,AN15G01580,AN03G05240,AN12G07070,AN11G07550,AN12G05400,AN18G00510,AN02G12800,AN09G00560,AN05G02000,AN06G02700,AN18G03380,AN03G00580,AN11G08410,AN09G05130,AN06G02670,AN04G08100,AN01G08690,AN07G00080,AN14G01260,AN01G09450,AN11G03800,AN04G08220,AN01G07830,AN09G02000,AN10G00660,AN01G00860,AN09G05140,AN09G03880,AN12G02730,AN0…
GO:MF	oxidoreductase activity, acting on paired donors, with incorporation or reduction of molecular oxygen	GO:0016705	4.44e-12	11.3526	242	1453	70	13013	AN15G01590,AN03G00530,AN15G01580,AN12G05400,AN09G00560,AN06G02700,AN03G00580,AN09G05130,AN06G02670,AN01G08690,AN07G00080,AN11G03800,AN09G02000,AN10G00660,AN04G09810,AN11G09260,AN09G04390,AN18G00490,AN03G02570,AN09G01840,AN03G02320,AN14G01245,AN09G01070,AN02G08860,AN02G05090,AN11G06510,AN12G04510,AN09G00590,AN16G01610,AN05G01120,AN08G09760,AN07G02080,AN12G01670,AN09G01850,AN12G04210,AN03G05310,AN1…
GO:MF	monooxygenase activity	GO:0004497	6.16e-10	9.21007	211	1739	67	13013	AN03G00530,AN12G05400,AN09G00560,AN03G00580,AN09G05130,AN06G02670,AN01G08690,AN07G00080,AN11G03800,AN09G02000,AN10G00660,AN09G04390,AN18G00490,AN03G02570,AN09G01840,AN03G02320,AN14G01245,AN09G01070,AN02G08860,AN02G05090,AN11G06510,AN12G04510,AN09G00590,AN05G01120,AN08G09760,AN07G02080,AN12G01670,AN09G01850,AN03G05310,AN18G00500,AN04G08440,AN01G08540,AN11G03540,AN08G06720,AN08G07920,AN16G01280,AN0…
GO:MF	cofactor binding	GO:0048037	2.5e-07	6.60172	737	1453	136	13013	AN15G01590,AN12G10680,AN03G00530,AN15G01580,AN12G07070,AN12G05400,AN18G00510,AN09G00560,AN06G02700,AN03G00580,AN06G02670,AN01G08690,AN07G00080,AN01G09450,AN11G03800,AN09G02000,AN10G00660,AN12G02730,AN09G01830,AN03G00920,AN04G09810,AN11G09260,AN11G07330,AN06G02340,AN09G04390,AN18G01630,AN16G00700,AN09G00530,AN18G00490,AN03G02570,AN09G01840,AN03G02320,AN14G01245,AN02G08860,AN05G02380,AN08G07240,AN0…
GO:MF	iron ion binding	GO:0005506	7.77e-07	6.10972	207	1449	53	13013	AN15G01590,AN15G01580,AN12G05400,AN09G00560,AN06G02700,AN03G00580,AN06G02670,AN01G08690,AN07G00080,AN09G02000,AN10G00660,AN04G09810,AN11G09260,AN03G02570,AN01G10910,AN14G01245,AN01G15100,AN02G08860,AN09G05150,AN02G05090,AN12G04510,AN05G01120,AN07G01390,AN09G01850,AN12G04210,AN18G00500,AN04G08440,AN11G03540,AN16G04760,AN02G10080,AN14G07260,AN01G14990,AN16G01030,AN02G09420,AN15G04380,AN12G01320,AN0…
GO:MF	flavin adenine dinucleotide binding	GO:0050660	1.94568e-06	5.71093	200	1453	51	13013	AN12G10680,AN03G00530,AN18G00510,AN11G03800,AN09G01830,AN11G07330,AN06G02340,AN09G04390,AN18G01630,AN09G00530,AN18G00490,AN09G01840,AN03G02320,AN05G02380,AN04G08890,AN01G08630,AN14G03340,AN01G14760,AN09G00590,AN12G10250,AN12G09510,AN02G11560,AN12G03440,AN08G09760,AN07G02080,AN14G02940,AN03G05310,AN18G05480,AN03G02090,AN01G08540,AN08G06720,AN16G06500,AN08G07920,AN11G00350,AN16G01280,AN08G08250,AN0…
GO:MF	heme binding	GO:0020037	2.21319e-06	5.65498	184	1449	48	13013	AN12G05400,AN09G00560,AN06G02700,AN03G00580,AN06G02670,AN01G08690,AN07G00080,AN09G02000,AN10G00660,AN11G09260,AN03G02570,AN14G01245,AN02G08860,AN02G05090,AN12G04510,AN05G01120,AN09G01850,AN12G04210,AN08G08920,AN12G00660,AN18G00500,AN04G08440,AN11G03540,AN04G02840,AN02G10080,AN14G07260,AN01G14990,AN16G01030,AN02G09420,AN15G04380,AN12G01320,AN01G06820,AN01G00680,AN01G15110,AN04G09540,AN11G01980,AN1…
GO:MF	tetrapyrrole binding	GO:0046906	2.67212e-06	5.57314	185	1449	48	13013	AN12G05400,AN09G00560,AN06G02700,AN03G00580,AN06G02670,AN01G08690,AN07G00080,AN09G02000,AN10G00660,AN11G09260,AN03G02570,AN14G01245,AN02G08860,AN02G05090,AN12G04510,AN05G01120,AN09G01850,AN12G04210,AN08G08920,AN12G00660,AN18G00500,AN04G08440,AN11G03540,AN04G02840,AN02G10080,AN14G07260,AN01G14990,AN16G01030,AN02G09420,AN15G04380,AN12G01320,AN01G06820,AN01G00680,AN01G15110,AN04G09540,AN11G01980,AN1…
GO:MF	FAD binding	GO:0071949	4.92157e-06	5.3079	122	1244	33	13013	AN12G10680,AN03G00530,AN18G00510,AN11G03800,AN09G01830,AN11G07330,AN06G02340,AN09G04390,AN18G01630,AN09G00530,AN18G00490,AN09G01840,AN03G02320,AN01G08630,AN14G03340,AN01G14760,AN09G00590,AN12G10250,AN07G02080,AN03G05310,AN03G02090,AN01G08540,AN08G06720,AN16G06500,AN08G07920,AN11G00350,AN16G01280,AN07G01440,AN09G01320,AN07G01350,AN08G08310,AN03G01030,AN18G01030
GO:MF	oxidoreductase activity, acting on CH-OH group of donors	GO:0016614	1.18851e-05	4.925	292	1509	66	13013	AN12G02700,AN18G00510,AN05G02000,AN04G08100,AN04G08220,AN01G07830,AN09G01830,AN16G06470,AN06G00750,AN08G09750,AN18G01630,AN16G01710,AN11G04100,AN11G04150,AN08G05320,AN05G02380,AN01G06850,AN04G08890,AN01G08630,AN01G14760,AN16G06450,AN12G09950,AN02G11560,AN12G03440,AN15G06250,AN14G02940,AN07G01320,AN13G01130,AN14G03510,AN18G05480,AN04G08120,AN04G09410,AN01G09820,AN05G02060,AN04G04170,AN11G00350,AN0…
GO:MF	oxidoreductase activity, acting on paired donors, with incorporation or reduction of molecular oxygen, NAD(P)H as one donor, and incorporation of one atom of oxygen	GO:0016709	0.000460511	3.33676	84	1739	28	13013	AN03G00530,AN12G05400,AN01G08690,AN11G03800,AN09G04390,AN18G00490,AN09G01840,AN03G02320,AN11G06510,AN12G04510,AN09G00590,AN08G09760,AN07G02080,AN09G01850,AN03G05310,AN01G08540,AN08G06720,AN08G07920,AN16G01280,AN13G02690,AN12G05000,AN01G15110,AN16G08060,AN15G02070,AN11G10310,AN04G02970,AN03G01540,AN09G01340
GO:MF	structural constituent of cell wall	GO:0005199	0.0017081	2.76749	6	10	2	13013	AN03G02360,AN03G02400
GO:MF	hydrolase activity, acting on glycosyl bonds	GO:0016798	0.00292375	2.53406	225	1275	43	13013	AN18G01410,AN01G01260,AN01G01920,AN01G04560,AN09G00880,AN08G08370,AN09G05920,AN04G09650,AN01G03090,AN03G00740,AN03G02080,AN15G04760,AN07G08950,AN06G02420,AN02G07020,AN01G06500,AN08G09140,AN18G04800,AN04G03170,AN02G10550,AN01G14650,AN01G11670,AN12G02220,AN15G03550,AN02G13180,AN11G02100,AN18G04100,AN18G04810,AN01G12550,AN01G05360,AN02G00140,AN06G00170,AN11G00200,AN14G05490,AN05G02440,AN03G00500,AN0…
GO:MF	hydrolase activity, hydrolyzing O-glycosyl compounds	GO:0004553	0.00805781	2.09378	205	1275	39	13013	AN18G01410,AN01G01260,AN01G01920,AN01G04560,AN09G00880,AN09G05920,AN01G03090,AN03G00740,AN03G02080,AN15G04760,AN07G08950,AN06G02420,AN02G07020,AN01G06500,AN08G09140,AN18G04800,AN04G03170,AN02G10550,AN01G14650,AN01G11670,AN12G02220,AN15G03550,AN02G13180,AN11G02100,AN18G04100,AN18G04810,AN01G12550,AN01G05360,AN02G00140,AN06G00170,AN11G00200,AN14G05490,AN05G02440,AN03G00500,AN01G04880,AN01G06630,AN0…
GO:MF	oxidoreductase activity, acting on paired donors, with incorporation or reduction of molecular oxygen, NAD(P)H as one donor, and incorporation of two atoms of oxygen into one donor	GO:0016708	0.00841577	2.07491	4	281	3	13013	AN15G01590,AN15G01580,AN04G09810
GO:MF	oxidoreductase activity, acting on the CH-OH group of donors, NAD or NADP as acceptor	GO:0016616	0.00971889	2.01238	201	1508	43	13013	AN12G02700,AN05G02000,AN04G08100,AN04G08220,AN01G07830,AN16G06470,AN06G00750,AN08G09750,AN16G01710,AN11G04150,AN08G05320,AN01G06850,AN16G06450,AN12G09950,AN15G06250,AN07G01320,AN13G01130,AN14G03510,AN04G08120,AN04G09410,AN01G09820,AN05G02060,AN04G04170,AN05G02050,AN14G07210,AN02G10040,AN05G02070,AN12G05870,AN12G04220,AN05G02260,AN08G09340,AN16G00400,AN16G01700,AN01G14000,AN04G02770,AN12G05100,AN1…
GO:MF	terpene synthase activity	GO:0010333	0.0178686	1.74791	10	118	3	13013	AN12G10670,AN03G00590,AN11G06260
GO:MF	dioxygenase activity	GO:0051213	0.0193686	1.7129	49	1700	17	13013	AN15G01590,AN15G01580,AN02G12800,AN04G09810,AN18G01020,AN01G10910,AN09G05150,AN11G02200,AN16G01610,AN01G02960,AN11G02180,AN12G01320,AN04G01280,AN04G05880,AN11G00180,AN01G10640,AN04G07210
GO:MF	coenzyme binding	GO:0050662	0.0295834	1.52895	450	1286	69	13013	AN12G10680,AN03G00530,AN18G00510,AN01G09450,AN11G03800,AN09G01830,AN03G00920,AN11G07330,AN06G02340,AN09G04390,AN18G01630,AN09G00530,AN18G00490,AN09G01840,AN03G02320,AN05G02380,AN08G07240,AN04G08890,AN01G08630,AN02G11030,AN14G03340,AN01G14760,AN09G00590,AN12G10250,AN13G03320,AN11G08250,AN12G09510,AN02G11560,AN12G03440,AN08G09760,AN07G02080,AN14G02940,AN04G02220,AN03G02110,AN02G00030,AN03G05310,AN1…
GO:MF	carbon-oxygen lyase activity, acting on phosphates	GO:0016838	0.0323275	1.49043	12	118	3	13013	AN12G10670,AN03G00590,AN11G06260
GO:MF	O-methyltransferase activity	GO:0008171	0.0358931	1.44499	39	1639	14	13013	AN14G05840,AN16G06360,AN03G05480,AN12G05370,AN02G00810,AN01G07720,AN11G08080,AN13G03370,AN03G05990,AN04G04700,AN15G02990,AN11G00070,AN11G00280,AN04G09520
GO:MF	oxidoreductase activity, acting on single donors with incorporation of molecular oxygen	GO:0016701	0.0464038	1.33345	43	1700	15	13013	AN02G12800,AN18G01020,AN01G10910,AN09G05150,AN11G02200,AN07G01390,AN01G02960,AN11G02180,AN16G04760,AN04G09730,AN04G01280,AN11G00180,AN05G01450,AN01G10640,AN04G07210
GO:MF	lyase activity	GO:0016829	0.0470257	1.32766	249	1710	53	13013	AN12G10670,AN03G00590,AN03G00450,AN12G02760,AN11G06260,AN02G00080,AN14G01235,AN09G00010,AN04G08090,AN03G02830,AN16G00180,AN01G01360,AN02G12810,AN02G11030,AN08G01420,AN07G00680,AN07G02050,AN13G02290,AN09G06090,AN13G03320,AN11G08250,AN11G03880,AN04G02220,AN15G04230,AN02G04430,AN11G09270,AN08G09920,AN04G02760,AN14G01130,AN06G02500,AN02G05560,AN12G07110,AN12G10050,AN07G00090,AN07G01440,AN15G07070,AN1…
GO:BP	oxidation-reduction process	GO:0055114	1.53e-09	8.81504	1321	1509	237	12803	AN01G01530,AN15G01590,AN09G02980,AN12G10680,AN12G02700,AN03G00530,AN14G05370,AN15G01580,AN03G05240,AN12G07070,AN11G07550,AN12G05400,AN18G00510,AN02G12800,AN09G00560,AN05G02000,AN06G02700,AN18G03380,AN03G00580,AN11G08410,AN09G05130,AN06G02670,AN04G08100,AN01G08690,AN07G00080,AN14G01260,AN11G03800,AN04G08220,AN01G07830,AN09G02000,AN10G00660,AN01G00860,AN09G05140,AN09G03880,AN12G02730,AN08G03890,AN0…
GO:BP	transmembrane transport	GO:0055085	0.00598332	2.22306	813	1632	145	12803	AN15G04270,AN12G05710,AN04G10000,AN08G08330,AN08G03150,AN18G00480,AN05G02550,AN12G09140,AN03G05250,AN14G01160,AN04G07510,AN13G03250,AN03G05890,AN06G00620,AN13G03480,AN18G01700,AN12G10130,AN08G10300,AN09G01910,AN02G10170,AN03G05950,AN03G06530,AN10G00880,AN10G00300,AN18G01070,AN06G00260,AN18G06370,AN08G09350,AN03G00320,AN12G09270,AN04G07680,AN01G14480,AN14G04340,AN02G08230,AN12G08350,AN01G08700,AN1…
GO:BP	indolalkylamine catabolic process	GO:0046218	0.0338685	1.4702	16	1700	9	12803	AN07G02080,AN12G00660,AN01G08540,AN13G03300,AN09G05280,AN08G05070,AN04G07200,AN08G04540,AN04G07210
GO:BP	tryptophan catabolic process	GO:0006569	0.0338685	1.4702	16	1700	9	12803	AN07G02080,AN12G00660,AN01G08540,AN13G03300,AN09G05280,AN08G05070,AN04G07200,AN08G04540,AN04G07210
GO:BP	indole-containing compound catabolic process	GO:0042436	0.0338685	1.4702	16	1700	9	12803	AN07G02080,AN12G00660,AN01G08540,AN13G03300,AN09G05280,AN08G05070,AN04G07200,AN08G04540,AN04G07210
GO:CC	fungal-type cell wall	GO:0009277	0.0220126	1.65733	20	10	2	12674	AN03G02360,AN03G02400

## Sheet: Cluster2a-gProfiler
source	term_name	term_id	adjusted_p_value	negative_log10_of_adjusted_p_value	term_size	query_size	intersection_size	effective_domain_size	intersections
GO:MF	catalytic activity	GO:0003824	0.000182727	3.7382	4382	460	204	13013	AN15G03730,AN12G08280,AN08G09700,AN15G03740,AN02G03330,AN12G10390,AN03G06220,AN14G01770,AN02G03320,AN08G04990,AN15G01860,AN02G00610,AN06G00340,AN14G00990,AN04G08360,AN13G01120,AN15G01830,AN07G05040,AN09G00260,AN18G01590,AN04G06920,AN01G09270,AN15G03750,AN03G03520,AN02G00740,AN16G07110,AN11G07760,AN04G05720,AN08G08720,AN04G06270,AN03G05330,AN15G06700,AN01G09550,AN16G05390,AN16G05690,AN09G06740,AN1…
GO:MF	transmembrane transporter activity	GO:0022857	0.000598779	3.22273	459	55	11	13013	AN14G02700,AN06G02390,AN04G09030,AN15G01830,AN14G02740,AN15G03940,AN03G03360,AN01G08780,AN01G04690,AN14G04280,AN06G02270
GO:MF	transporter activity	GO:0005215	0.00176889	2.7523	514	55	11	13013	AN14G02700,AN06G02390,AN04G09030,AN15G01830,AN14G02740,AN15G03940,AN03G03360,AN01G08780,AN01G04690,AN14G04280,AN06G02270
GO:MF	carnitine O-acetyltransferase activity	GO:0004092	0.001813	2.7416	2	38	2	13013	AN08G04990,AN18G01590
GO:MF	carnitine O-acyltransferase activity	GO:0016406	0.001813	2.7416	2	38	2	13013	AN08G04990,AN18G01590
GO:MF	motor activity	GO:0003774	0.00203532	2.69137	21	326	6	13013	AN02G01200,AN07G04780,AN08G10640,AN02G08840,AN07G07570,AN12G01500
GO:MF	microtubule motor activity	GO:0003777	0.00269245	2.56985	16	729	7	13013	AN02G01200,AN08G10640,AN02G08840,AN07G07570,AN12G01500,AN14G05920,AN18G02940
GO:MF	cytoskeletal protein binding	GO:0008092	0.00619004	2.20831	55	382	9	13013	AN04G05700,AN02G01200,AN07G04780,AN08G10640,AN02G08840,AN07G07570,AN12G01500,AN16G08460,AN13G00290
GO:MF	microtubule binding	GO:0008017	0.0100896	1.99613	17	326	5	13013	AN02G01200,AN08G10640,AN02G08840,AN07G07570,AN12G01500
GO:MF	oxidoreductase activity, acting on the CH-CH group of donors	GO:0016627	0.0222853	1.65198	72	601	12	13013	AN16G05340,AN14G05750,AN14G02890,AN16G07150,AN11G10470,AN14G03240,AN11G00400,AN01G07000,AN14G04400,AN01G13930,AN07G03170,AN01G00120
GO:MF	carbon-oxygen lyase activity	GO:0016835	0.0231138	1.63613	88	344	10	13013	AN14G00990,AN15G06700,AN16G05390,AN02G02820,AN11G04030,AN12G07850,AN16G03550,AN14G06290,AN10G00440,AN08G10530
GO:MF	hydro-lyase activity	GO:0016836	0.041654	1.38034	61	344	8	13013	AN14G00990,AN15G06700,AN16G05390,AN02G02820,AN12G07850,AN16G03550,AN14G06290,AN08G10530
GO:BP	peroxisome organization	GO:0007031	1.85177e-06	5.73241	23	468	10	12803	AN01G04690,AN11G02590,AN16G02010,AN16G04020,AN16G07610,AN18G02980,AN04G09150,AN01G13690,AN17G01440,AN14G00700
GO:BP	peroxisomal transport	GO:0043574	9.88759e-06	5.00491	15	468	8	12803	AN09G06740,AN16G02010,AN16G04020,AN16G07610,AN18G02980,AN01G13690,AN17G01440,AN14G00700
GO:BP	peroxisomal membrane transport	GO:0015919	9.88759e-06	5.00491	15	468	8	12803	AN09G06740,AN16G02010,AN16G04020,AN16G07610,AN18G02980,AN01G13690,AN17G01440,AN14G00700
GO:BP	fatty acid oxidation	GO:0019395	4.19257e-05	4.37752	7	86	4	12803	AN01G04690,AN04G05720,AN09G06740,AN11G02590
GO:BP	lipid oxidation	GO:0034440	4.19257e-05	4.37752	7	86	4	12803	AN01G04690,AN04G05720,AN09G06740,AN11G02590
GO:BP	establishment of protein localization to peroxisome	GO:0072663	7.58046e-05	4.1203	13	468	7	12803	AN16G02010,AN16G04020,AN16G07610,AN18G02980,AN01G13690,AN17G01440,AN14G00700
GO:BP	protein localization to peroxisome	GO:0072662	7.58046e-05	4.1203	13	468	7	12803	AN16G02010,AN16G04020,AN16G07610,AN18G02980,AN01G13690,AN17G01440,AN14G00700
GO:BP	protein targeting to peroxisome	GO:0006625	7.58046e-05	4.1203	13	468	7	12803	AN16G02010,AN16G04020,AN16G07610,AN18G02980,AN01G13690,AN17G01440,AN14G00700
GO:BP	cytokinesis	GO:0000910	0.000273932	3.56236	93	491	16	12803	AN14G05530,AN14G00660,AN02G10710,AN15G04520,AN12G03830,AN07G05410,AN07G08210,AN07G04780,AN12G08100,AN02G07890,AN01G05660,AN13G00290,AN08G08590,AN11G10410,AN14G05050,AN01G11910
GO:BP	protein import into peroxisome matrix	GO:0016558	0.00058544	3.23252	11	468	6	12803	AN16G02010,AN16G04020,AN16G07610,AN18G02980,AN01G13690,AN14G00700
GO:BP	fatty acid metabolic process	GO:0006631	0.0019148	2.71788	76	106	7	12803	AN02G03330,AN03G03360,AN01G04690,AN04G05720,AN09G06740,AN11G02590,AN14G02890
GO:BP	fatty acid beta-oxidation	GO:0006635	0.00207051	2.68392	6	71	3	12803	AN01G04690,AN04G05720,AN09G06740
GO:BP	cytoskeleton organization	GO:0007010	0.00261724	2.58216	176	493	21	12803	AN14G05530,AN14G00660,AN02G10710,AN15G04520,AN12G03830,AN07G05410,AN04G05700,AN07G08210,AN07G03090,AN07G04780,AN12G08100,AN02G08840,AN07G07570,AN12G01500,AN16G08460,AN13G00290,AN16G04670,AN14G05050,AN02G01210,AN01G11910,AN16G03020
GO:BP	cytoskeleton-dependent cytokinesis	GO:0061640	0.00355175	2.44956	76	491	13	12803	AN14G00660,AN02G10710,AN15G04520,AN12G03830,AN07G05410,AN07G08210,AN07G04780,AN12G08100,AN13G00290,AN08G08590,AN11G10410,AN14G05050,AN01G11910
GO:BP	cytokinetic process	GO:0032506	0.00367686	2.43452	58	291	9	12803	AN14G05530,AN14G00660,AN02G10710,AN15G04520,AN07G05410,AN07G08210,AN07G04780,AN12G08100,AN02G07890
GO:BP	monocarboxylic acid metabolic process	GO:0032787	0.00443972	2.35264	160	106	9	12803	AN02G03330,AN15G01860,AN03G03360,AN16G07110,AN01G04690,AN04G05720,AN09G06740,AN11G02590,AN14G02890
GO:BP	carnitine metabolic process	GO:0009437	0.0052468	2.28011	3	259	3	12803	AN08G04990,AN18G01590,AN18G05220
GO:BP	amino-acid betaine metabolic process	GO:0006577	0.0052468	2.28011	3	259	3	12803	AN08G04990,AN18G01590,AN18G05220
GO:BP	cell division	GO:0051301	0.0069243	2.15962	118	491	16	12803	AN14G05530,AN14G00660,AN02G10710,AN15G04520,AN12G03830,AN07G05410,AN07G08210,AN07G04780,AN12G08100,AN02G07890,AN01G05660,AN13G00290,AN08G08590,AN11G10410,AN14G05050,AN01G11910
GO:BP	localization	GO:0051179	0.00766766	2.11534	1456	815	132	12803	AN14G02700,AN06G02390,AN01G10360,AN04G09030,AN15G01830,AN14G02740,AN15G03940,AN01G08780,AN01G04690,AN14G04280,AN06G02270,AN09G06740,AN13G03990,AN04G08320,AN16G02010,AN07G05500,AN15G05510,AN16G04020,AN01G05830,AN16G07610,AN09G06780,AN02G05230,AN14G05530,AN16G00800,AN02G10710,AN08G05450,AN02G00560,AN05G01290,AN15G04520,AN02G01480,AN18G02980,AN07G05410,AN04G06250,AN07G08210,AN16G00460,AN07G06240,AN1…
GO:BP	mitotic spindle organization	GO:0007052	0.00773868	2.11133	22	491	7	12803	AN15G04520,AN07G03090,AN12G08100,AN02G08840,AN07G07570,AN12G01500,AN01G11910
GO:BP	actomyosin contractile ring organization	GO:0044837	0.0102019	1.99132	39	273	7	12803	AN14G00660,AN02G10710,AN15G04520,AN07G05410,AN07G08210,AN07G04780,AN12G08100
GO:BP	actomyosin structure organization	GO:0031032	0.0102019	1.99132	39	273	7	12803	AN14G00660,AN02G10710,AN15G04520,AN07G05410,AN07G08210,AN07G04780,AN12G08100
GO:BP	mitotic spindle elongation	GO:0000022	0.0111915	1.95111	10	491	5	12803	AN07G03090,AN02G08840,AN07G07570,AN12G01500,AN01G11910
GO:BP	carbohydrate metabolic process	GO:0005975	0.0122625	1.91142	385	64	10	12803	AN12G08280,AN12G10390,AN03G06220,AN14G01770,AN15G01860,AN02G00610,AN09G00260,AN04G06920,AN03G05330,AN16G05390
GO:BP	microtubule cytoskeleton organization involved in mitosis	GO:1902850	0.0131556	1.88089	27	787	9	12803	AN15G04520,AN07G03090,AN12G08100,AN02G08840,AN07G07570,AN12G01500,AN01G11910,AN18G02940,AN04G01520
GO:BP	polysaccharide catabolic process	GO:0000272	0.0155005	1.80965	88	226	9	12803	AN12G08280,AN12G10390,AN03G05330,AN03G05380,AN01G10350,AN11G04030,AN03G06550,AN08G01710,AN01G00330
GO:BP	fatty acid catabolic process	GO:0009062	0.0167444	1.77613	11	71	3	12803	AN01G04690,AN04G05720,AN09G06740
GO:BP	antibiotic metabolic process	GO:0016999	0.0184934	1.73298	53	720	12	12803	AN15G01860,AN16G07110,AN02G12430,AN02G02750,AN12G07850,AN08G10530,AN14G04400,AN07G03170,AN09G06680,AN07G06840,AN02G11040,AN02G08110
GO:BP	spindle elongation	GO:0051231	0.0198713	1.70177	11	491	5	12803	AN07G03090,AN02G08840,AN07G07570,AN12G01500,AN01G11910
GO:BP	regulation of cytokinesis	GO:0032465	0.0208741	1.68039	36	460	8	12803	AN14G05530,AN02G10710,AN15G04520,AN12G08100,AN01G05660,AN08G08590,AN11G10410,AN14G05050
GO:BP	macromolecule localization	GO:0033036	0.0290442	1.53694	503	829	56	12803	AN09G06740,AN16G02010,AN16G04020,AN16G07610,AN14G05530,AN02G10710,AN15G04520,AN18G02980,AN07G05410,AN07G08210,AN01G12750,AN01G13690,AN01G05660,AN13G00290,AN07G01470,AN11G10720,AN04G07100,AN17G01440,AN15G02740,AN14G05050,AN06G01630,AN14G00700,AN02G14400,AN15G01510,AN01G11910,AN16G02460,AN11G01510,AN08G10360,AN01G07420,AN02G01690,AN11G10710,AN08G10650,AN01G07320,AN15G01520,AN18G04110,AN15G03220,AN0…
GO:BP	protein import into peroxisome matrix, docking	GO:0016560	0.0320986	1.49351	4	300	3	12803	AN16G04020,AN16G07610,AN01G13690
GO:BP	actin cytoskeleton organization	GO:0030036	0.0323031	1.49076	112	463	14	12803	AN14G05530,AN14G00660,AN02G10710,AN15G04520,AN07G05410,AN04G05700,AN07G08210,AN07G04780,AN12G08100,AN16G08460,AN13G00290,AN16G04670,AN14G05050,AN02G01210
GO:BP	cellular localization	GO:0051641	0.0331472	1.47955	565	829	61	12803	AN09G06740,AN16G02010,AN15G05510,AN16G04020,AN16G07610,AN14G05530,AN02G10710,AN15G04520,AN18G02980,AN07G05410,AN07G08210,AN02G08840,AN01G12750,AN01G13690,AN01G05660,AN07G07570,AN12G00800,AN13G00290,AN11G10720,AN04G07100,AN17G01440,AN15G02740,AN08G03960,AN14G05050,AN06G01630,AN02G01210,AN14G00700,AN02G14400,AN01G11910,AN16G02460,AN11G01510,AN08G10360,AN01G07420,AN02G01690,AN11G10710,AN08G10650,AN0…
GO:BP	lipid modification	GO:0030258	0.0333272	1.4772	31	86	4	12803	AN01G04690,AN04G05720,AN09G06740,AN11G02590
GO:BP	carboxylic acid catabolic process	GO:0046395	0.0422474	1.3742	77	71	5	12803	AN07G05040,AN01G04690,AN04G05720,AN16G05390,AN09G06740
GO:BP	organic acid catabolic process	GO:0016054	0.0422474	1.3742	77	71	5	12803	AN07G05040,AN01G04690,AN04G05720,AN16G05390,AN09G06740
GO:BP	actin filament-based process	GO:0030029	0.0433569	1.36294	115	463	14	12803	AN14G05530,AN14G00660,AN02G10710,AN15G04520,AN07G05410,AN04G05700,AN07G08210,AN07G04780,AN12G08100,AN16G08460,AN13G00290,AN16G04670,AN14G05050,AN02G01210
GO:BP	regulation of cell division	GO:0051302	0.0467602	1.33012	40	460	8	12803	AN14G05530,AN02G10710,AN15G04520,AN12G08100,AN01G05660,AN08G08590,AN11G10410,AN14G05050
GO:BP	spindle organization	GO:0007051	0.0483037	1.31602	29	326	6	12803	AN15G04520,AN07G03090,AN12G08100,AN02G08840,AN07G07570,AN12G01500
GO:CC	microbody	GO:0042579	1.57e-09	8.80466	45	347	14	12674	AN18G01590,AN01G04690,AN04G05720,AN09G06740,AN11G02590,AN16G02010,AN16G04020,AN16G07610,AN18G02980,AN02G02750,AN04G09150,AN09G05670,AN01G13690,AN02G11790
GO:CC	peroxisome	GO:0005777	1.57e-09	8.80466	45	347	14	12674	AN18G01590,AN01G04690,AN04G05720,AN09G06740,AN11G02590,AN16G02010,AN16G04020,AN16G07610,AN18G02980,AN02G02750,AN04G09150,AN09G05670,AN01G13690,AN02G11790
GO:CC	microbody part	GO:0044438	3.66e-07	6.43641	20	246	8	12674	AN01G04690,AN04G05720,AN11G02590,AN16G04020,AN16G07610,AN18G02980,AN02G02750,AN04G09150
GO:CC	peroxisomal part	GO:0044439	3.66e-07	6.43641	20	246	8	12674	AN01G04690,AN04G05720,AN11G02590,AN16G04020,AN16G07610,AN18G02980,AN02G02750,AN04G09150
GO:CC	cytoskeletal part	GO:0044430	0.000259183	3.58639	258	686	34	12674	AN06G01580,AN02G10710,AN15G04520,AN12G03830,AN07G08210,AN02G01200,AN07G03090,AN07G04780,AN08G10640,AN12G08100,AN02G08840,AN01G12750,AN01G05660,AN07G07570,AN12G01500,AN16G08460,AN13G00290,AN16G04670,AN08G08590,AN01G04470,AN07G08490,AN14G05050,AN02G01210,AN01G11910,AN16G03020,AN17G02040,AN11G01510,AN01G07420,AN02G10400,AN14G05920,AN09G05230,AN15G00470,AN11G10060,AN02G07140
GO:CC	cytoskeleton	GO:0005856	0.000368981	3.433	262	686	34	12674	AN06G01580,AN02G10710,AN15G04520,AN12G03830,AN07G08210,AN02G01200,AN07G03090,AN07G04780,AN08G10640,AN12G08100,AN02G08840,AN01G12750,AN01G05660,AN07G07570,AN12G01500,AN16G08460,AN13G00290,AN16G04670,AN08G08590,AN01G04470,AN07G08490,AN14G05050,AN02G01210,AN01G11910,AN16G03020,AN17G02040,AN11G01510,AN01G07420,AN02G10400,AN14G05920,AN09G05230,AN15G00470,AN11G10060,AN02G07140
GO:CC	membrane protein complex	GO:0098796	0.000385249	3.41426	220	861	35	12674	AN15G05510,AN04G03495,AN04G05310,AN14G04400,AN16G02460,AN07G03740,AN07G03170,AN02G01690,AN08G10650,AN01G07320,AN01G08950,AN02G04520,AN16G08570,AN08G03270,AN16G03320,AN04G05640,AN04G02070,AN02G10440,AN14G04180,AN06G01540,AN01G04730,AN16G07970,AN07G06030,AN16G07410,AN09G06650,AN01G04630,AN02G14560,AN12G04000,AN01G08980,AN03G04340,AN07G04190,AN02G05870,AN04G02480,AN06G01550,AN02G11950
GO:CC	microbody membrane	GO:0031903	0.00267297	2.57301	17	246	5	12674	AN01G04690,AN11G02590,AN16G04020,AN16G07610,AN04G09150
GO:CC	peroxisomal membrane	GO:0005778	0.00267297	2.57301	17	246	5	12674	AN01G04690,AN11G02590,AN16G04020,AN16G07610,AN04G09150
GO:CC	microbody lumen	GO:0031907	0.00284691	2.54563	4	196	3	12674	AN04G05720,AN18G02980,AN02G02750
GO:CC	peroxisomal matrix	GO:0005782	0.00284691	2.54563	4	196	3	12674	AN04G05720,AN18G02980,AN02G02750
GO:CC	transporter complex	GO:1990351	0.00380589	2.41954	15	143	4	12674	AN11G02590,AN15G05510,AN16G04020,AN16G07610
GO:CC	microtubule cytoskeleton	GO:0015630	0.00454818	2.34216	200	636	25	12674	AN06G01580,AN02G10710,AN15G04520,AN07G08210,AN02G01200,AN07G03090,AN08G10640,AN12G08100,AN02G08840,AN01G12750,AN07G07570,AN12G01500,AN08G08590,AN01G04470,AN07G08490,AN14G05050,AN01G11910,AN16G03020,AN17G02040,AN11G01510,AN01G07420,AN02G10400,AN14G05920,AN09G05230,AN15G00470
GO:CC	Golgi-associated vesicle membrane	GO:0030660	0.00470535	2.32741	26	829	9	12674	AN16G02460,AN02G01690,AN08G10650,AN08G03270,AN16G03320,AN04G02070,AN01G04730,AN07G06030,AN02G05870
GO:CC	Golgi-associated vesicle	GO:0005798	0.00549056	2.26038	46	829	12	12674	AN08G03960,AN15G01510,AN16G02460,AN02G01690,AN08G10650,AN08G03270,AN16G03320,AN04G02070,AN08G08540,AN01G04730,AN07G06030,AN02G05870
GO:CC	peroxisomal importomer complex	GO:1990429	0.00941192	2.02632	7	143	3	12674	AN11G02590,AN16G04020,AN16G07610
GO:CC	Golgi membrane	GO:0000139	0.0104488	1.98094	56	834	13	12674	AN06G01630,AN15G01510,AN16G02460,AN02G01690,AN08G10650,AN15G01520,AN01G12290,AN08G03270,AN16G03320,AN01G04730,AN07G06030,AN02G05870,AN04G02480
GO:CC	vesicle coat	GO:0030120	0.0114182	1.9424	25	740	8	12674	AN16G02460,AN02G01690,AN08G10650,AN08G03270,AN16G03320,AN04G02070,AN01G04730,AN07G06030
GO:CC	Pex17p-Pex14p docking complex	GO:1990415	0.0149345	1.82581	8	143	3	12674	AN11G02590,AN16G04020,AN16G07610
GO:CC	membrane coat	GO:0030117	0.0169931	1.76973	30	829	9	12674	AN16G02460,AN02G01690,AN08G10650,AN08G03270,AN16G03320,AN04G02070,AN01G04730,AN07G06030,AN02G05870
GO:CC	coated vesicle membrane	GO:0030662	0.0169931	1.76973	30	829	9	12674	AN16G02460,AN02G01690,AN08G10650,AN08G03270,AN16G03320,AN04G02070,AN01G04730,AN07G06030,AN02G05870
GO:CC	coated membrane	GO:0048475	0.0169931	1.76973	30	829	9	12674	AN16G02460,AN02G01690,AN08G10650,AN08G03270,AN16G03320,AN04G02070,AN01G04730,AN07G06030,AN02G05870
GO:CC	cell periphery	GO:0071944	0.029013	1.53741	261	780	32	12674	AN03G06220,AN15G05510,AN14G05530,AN12G03830,AN07G08210,AN07G04780,AN07G07530,AN01G08560,AN01G05660,AN04G06200,AN01G06690,AN16G08460,AN13G00290,AN16G04670,AN10G00400,AN07G01470,AN16G07040,AN11G10720,AN11G10410,AN15G02740,AN02G01210,AN11G01540,AN01G08950,AN09G04590,AN11G10060,AN04G02070,AN08G08540,AN18G02940,AN16G07970,AN13G00850,AN08G01060,AN03G06960
GO:CC	intrinsic component of peroxisomal membrane	GO:0031231	0.0321645	1.49262	9	444	4	12674	AN01G04690,AN11G02590,AN04G09150,AN17G01440
GO:CC	integral component of peroxisomal membrane	GO:0005779	0.0321645	1.49262	9	444	4	12674	AN01G04690,AN11G02590,AN04G09150,AN17G01440
GO:CC	organelle membrane	GO:0031090	0.0397757	1.40038	461	861	52	12674	AN03G03360,AN01G04690,AN11G02590,AN16G04020,AN16G07610,AN04G09150,AN01G08560,AN09G03630,AN13G00290,AN02G04860,AN08G00560,AN17G01440,AN06G01630,AN14G00700,AN15G01510,AN14G04400,AN16G02460,AN11G01510,AN01G13930,AN02G01690,AN08G10650,AN15G01520,AN16G03390,AN01G12290,AN04G08800,AN02G04520,AN02G03780,AN08G03270,AN16G03320,AN04G05640,AN09G03250,AN04G02070,AN02G10440,AN14G04180,AN01G04730,AN07G06030,AN0…
GO:CC	mitotic spindle pole body	GO:0044732	0.0436377	1.36014	119	686	17	12674	AN02G10710,AN15G04520,AN07G08210,AN12G08100,AN01G12750,AN12G01500,AN01G04470,AN07G08490,AN14G05050,AN16G03020,AN17G02040,AN11G01510,AN01G07420,AN02G10400,AN09G05230,AN15G00470,AN02G07140
GO:CC	oligosaccharyltransferase complex	GO:0008250	0.0475293	1.32304	6	825	4	12674	AN04G03495,AN16G08570,AN02G14560,AN07G04190
GO:CC	endomembrane system	GO:0012505	0.0491435	1.30853	631	842	65	12674	AN11G02590,AN15G05510,AN12G08100,AN16G03550,AN04G06200,AN16G08460,AN13G00290,AN16G02150,AN02G04860,AN08G00560,AN11G10720,AN04G03495,AN17G01440,AN04G05310,AN08G03960,AN06G01630,AN02G14400,AN15G01510,AN16G05150,AN16G02460,AN04G03350,AN01G11100,AN11G01510,AN01G07420,AN07G03740,AN02G01690,AN08G10650,AN01G07320,AN15G01520,AN18G04110,AN01G12290,AN07G09170,AN02G03780,AN15G00470,AN16G03640,AN16G08570,AN0…
GO:CC	vesicle membrane	GO:0012506	0.0491682	1.30832	34	829	9	12674	AN16G02460,AN02G01690,AN08G10650,AN08G03270,AN16G03320,AN04G02070,AN01G04730,AN07G06030,AN02G05870
GO:CC	cytoplasmic vesicle membrane	GO:0030659	0.0491682	1.30832	34	829	9	12674	AN16G02460,AN02G01690,AN08G10650,AN08G03270,AN16G03320,AN04G02070,AN01G04730,AN07G06030,AN02G05870

## Sheet: Cluster3-gProfiler
source	term_name	term_id	adjusted_p_value	negative_log10_of_adjusted_p_value	term_size	query_size	intersection_size	effective_domain_size	intersections
GO:MF	catalytic activity	GO:0003824	0.00301799	2.52028	4382	1392	540	13013	AN18G06670,AN18G06050,AN18G05940,AN18G05910,AN18G05890,AN18G05670,AN18G05220,AN18G04430,AN18G04420,AN18G04290,AN18G03770,AN18G03220,AN18G02980,AN18G02940,AN18G02170,AN18G02020,AN18G01590,AN18G01450,AN17G02030,AN17G01490,AN17G01480,AN17G01150,AN17G01060,AN17G00970,AN17G00640,AN17G00550,AN16G08820,AN16G08730,AN16G08670,AN16G08570,AN16G08140,AN16G08100,AN16G08080,AN16G07970,AN16G07410,AN16G07150,AN1…
GO:MF	ubiquitin protein ligase activity	GO:0061630	0.017971	1.74543	12	1392	7	13013	AN16G07970,AN14G05050,AN14G04980,AN08G01060,AN07G03890,AN04G06400,AN01G03060
GO:MF	ubiquitin-like protein ligase activity	GO:0061659	0.0353386	1.45175	13	1392	7	13013	AN16G07970,AN14G05050,AN14G04980,AN08G01060,AN07G03890,AN04G06400,AN01G03060
GO:BP	carbohydrate metabolic process	GO:0005975	0.000901094	3.04523	385	1344	71	12803	AN18G05940,AN18G05910,AN16G07040,AN16G05390,AN16G04160,AN15G07810,AN15G07800,AN15G07760,AN15G04900,AN15G02300,AN15G01860,AN14G06500,AN14G02670,AN14G01770,AN13G00400,AN12G10560,AN12G10390,AN12G09850,AN12G08280,AN11G10990,AN11G06540,AN11G06080,AN11G04040,AN11G04030,AN11G03340,AN11G02550,AN11G01540,AN11G01120,AN10G00400,AN09G06680,AN09G06020,AN09G03450,AN09G03300,AN09G03100,AN09G00260,AN08G10780,AN0…
GO:BP	peroxisomal membrane transport	GO:0015919	0.00268739	2.57067	15	1344	9	12803	AN18G02980,AN17G01440,AN16G07610,AN16G04020,AN16G02010,AN14G00700,AN09G06740,AN02G06680,AN01G13690
GO:BP	peroxisomal transport	GO:0043574	0.00268739	2.57067	15	1344	9	12803	AN18G02980,AN17G01440,AN16G07610,AN16G04020,AN16G02010,AN14G00700,AN09G06740,AN02G06680,AN01G13690
GO:BP	localization	GO:0051179	0.00428725	2.36782	1456	1344	203	12803	AN18G04260,AN18G04110,AN18G03770,AN18G03580,AN18G02980,AN18G02940,AN18G01760,AN18G01150,AN18G00070,AN18G00030,AN17G02080,AN17G02040,AN17G01945,AN17G01550,AN17G01440,AN16G08830,AN16G08460,AN16G08330,AN16G08080,AN16G07970,AN16G07610,AN16G07410,AN16G04020,AN16G03640,AN16G03630,AN16G03320,AN16G03300,AN16G02460,AN16G02010,AN16G00800,AN16G00460,AN16G00090,AN15G05530,AN15G05510,AN15G04630,AN15G04580,AN1…
GO:BP	peroxisome organization	GO:0007031	0.00429329	2.36721	23	1344	11	12803	AN18G02980,AN17G01440,AN16G07610,AN16G04020,AN16G02010,AN14G00700,AN11G02590,AN04G09150,AN02G06680,AN01G13690,AN01G04690
GO:BP	establishment of protein localization to peroxisome	GO:0072663	0.00734628	2.13393	13	1344	8	12803	AN18G02980,AN17G01440,AN16G07610,AN16G04020,AN16G02010,AN14G00700,AN02G06680,AN01G13690
GO:BP	protein localization to peroxisome	GO:0072662	0.00734628	2.13393	13	1344	8	12803	AN18G02980,AN17G01440,AN16G07610,AN16G04020,AN16G02010,AN14G00700,AN02G06680,AN01G13690
GO:BP	protein targeting to peroxisome	GO:0006625	0.00734628	2.13393	13	1344	8	12803	AN18G02980,AN17G01440,AN16G07610,AN16G04020,AN16G02010,AN14G00700,AN02G06680,AN01G13690
GO:BP	generation of precursor metabolites and energy	GO:0006091	0.00790447	2.10213	132	1344	31	12803	AN16G03910,AN15G03220,AN15G01860,AN14G04400,AN14G04180,AN14G04080,AN14G00310,AN12G07850,AN11G09970,AN09G06850,AN09G06680,AN09G06650,AN09G06020,AN08G10530,AN07G06840,AN07G03170,AN07G02700,AN04G05640,AN04G04750,AN02G12770,AN02G12430,AN02G11040,AN02G07470,AN02G04660,AN02G02920,AN02G01830,AN01G12610,AN01G08910,AN01G06180,AN01G03000,AN01G00120
GO:BP	cellular respiration	GO:0045333	0.008529	2.0691	79	1344	22	12803	AN16G03910,AN15G01860,AN14G04400,AN14G04080,AN14G00310,AN12G07850,AN11G09970,AN09G06850,AN09G06680,AN09G06650,AN08G10530,AN07G03170,AN04G05640,AN04G04750,AN02G12770,AN02G12430,AN02G11040,AN02G04660,AN02G01830,AN01G12610,AN01G06180,AN01G00120
GO:BP	monosaccharide metabolic process	GO:0005996	0.0141706	1.84861	54	1344	17	12803	AN16G04160,AN15G02300,AN12G10560,AN11G02550,AN11G01120,AN08G01710,AN07G03140,AN07G02100,AN04G09290,AN04G05300,AN04G02090,AN02G14490,AN02G11320,AN02G10400,AN02G07470,AN02G02920,AN01G00330
GO:BP	energy derivation by oxidation of organic compounds	GO:0015980	0.0169308	1.77132	88	1344	23	12803	AN16G03910,AN15G01860,AN14G04400,AN14G04080,AN14G00310,AN12G07850,AN11G09970,AN09G06850,AN09G06680,AN09G06650,AN09G06020,AN08G10530,AN07G03170,AN04G05640,AN04G04750,AN02G12770,AN02G12430,AN02G11040,AN02G04660,AN02G01830,AN01G12610,AN01G06180,AN01G00120
GO:BP	drug metabolic process	GO:0017144	0.0191753	1.71726	238	1344	46	12803	AN18G05940,AN16G08100,AN16G07410,AN16G07110,AN15G01860,AN14G04400,AN14G04180,AN14G04080,AN14G03370,AN14G00660,AN14G00310,AN12G07850,AN11G04040,AN11G04030,AN11G01540,AN09G06850,AN09G06710,AN09G06680,AN09G06650,AN09G06050,AN09G04520,AN08G10530,AN08G07740,AN08G01000,AN07G10100,AN07G06840,AN07G03170,AN04G09690,AN04G06020,AN04G04750,AN04G04670,AN03G00190,AN02G12770,AN02G12430,AN02G11040,AN02G10440,AN0…
GO:BP	posttranslational protein targeting to membrane, translocation	GO:0031204	0.0197126	1.70526	8	1344	6	12803	AN16G08830,AN11G04180,AN03G04340,AN02G01510,AN01G13220,AN01G13070
GO:BP	intracellular protein transmembrane transport	GO:0065002	0.0271028	1.56699	41	1344	14	12803	AN18G02980,AN16G08830,AN16G07610,AN16G04020,AN16G02010,AN14G00700,AN11G04180,AN11G02140,AN07G07880,AN03G04340,AN02G01510,AN01G13690,AN01G13220,AN01G13070
GO:BP	protein transmembrane transport	GO:0071806	0.0367608	1.43462	42	1344	14	12803	AN18G02980,AN16G08830,AN16G07610,AN16G04020,AN16G02010,AN14G00700,AN11G04180,AN11G02140,AN07G07880,AN03G04340,AN02G01510,AN01G13690,AN01G13220,AN01G13070
GO:BP	carbohydrate catabolic process	GO:0016052	0.038558	1.41389	149	1344	32	12803	AN18G05940,AN16G05390,AN15G07800,AN15G04900,AN15G02300,AN14G06500,AN12G10390,AN12G08280,AN11G06540,AN11G04040,AN11G04030,AN11G03340,AN11G01120,AN09G06680,AN09G03100,AN08G01710,AN07G03140,AN04G09690,AN04G05300,AN03G06550,AN03G05380,AN03G05330,AN03G05260,AN03G00190,AN02G07470,AN02G07140,AN02G02920,AN01G12150,AN01G10350,AN01G09290,AN01G07300,AN01G00330
GO:BP	tricarboxylic acid cycle	GO:0006099	0.041502	1.38193	28	1344	11	12803	AN15G01860,AN14G04400,AN14G00310,AN12G07850,AN09G06680,AN08G10530,AN07G03170,AN04G04750,AN02G12770,AN02G12430,AN02G11040
GO:BP	organic substance catabolic process	GO:1901575	0.0438061	1.35846	569	1344	89	12803	AN18G05940,AN18G04290,AN18G03220,AN18G02980,AN16G08100,AN16G07970,AN16G05390,AN16G04100,AN15G07800,AN15G04900,AN15G02300,AN14G06500,AN14G06290,AN14G03370,AN14G00700,AN12G10390,AN12G08280,AN12G04800,AN12G04000,AN12G00410,AN11G11210,AN11G10450,AN11G06540,AN11G06210,AN11G04310,AN11G04180,AN11G04040,AN11G04030,AN11G03340,AN11G01120,AN11G00670,AN09G06740,AN09G06680,AN09G06020,AN09G03100,AN08G12250,AN0…
GO:CC	organelle membrane	GO:0031090	2.25283e-06	5.64727	461	1311	87	12674	AN17G01550,AN17G01440,AN16G08830,AN16G08820,AN16G07610,AN16G07410,AN16G04020,AN16G03390,AN16G03320,AN16G02460,AN15G01520,AN15G01510,AN14G06000,AN14G04400,AN14G04180,AN14G04080,AN14G04040,AN14G00700,AN14G00250,AN14G00240,AN13G00290,AN12G04000,AN11G05000,AN11G04310,AN11G04180,AN11G03290,AN11G02760,AN11G02590,AN11G02140,AN11G01510,AN09G06650,AN09G06290,AN09G03630,AN09G03250,AN08G10650,AN08G03270,AN0…
GO:CC	membrane protein complex	GO:0098796	2.22757e-05	4.65217	220	1311	49	12674	AN16G08830,AN16G08570,AN16G07970,AN16G07410,AN16G03320,AN16G02460,AN15G05510,AN14G04400,AN14G04180,AN14G04080,AN12G04000,AN11G02760,AN11G02140,AN09G06650,AN08G10650,AN08G03270,AN07G07880,AN07G06030,AN07G04190,AN07G03740,AN07G03170,AN06G01550,AN06G01540,AN05G00140,AN04G09170,AN04G07090,AN04G05640,AN04G05310,AN04G03495,AN04G02480,AN04G02070,AN03G04340,AN02G14560,AN02G13570,AN02G11950,AN02G10440,AN0…
GO:CC	microbody	GO:0042579	2.72251e-05	4.56503	45	1311	18	12674	AN18G02980,AN18G01590,AN17G01440,AN16G07610,AN16G05570,AN16G04020,AN16G02010,AN11G02590,AN09G06740,AN09G05670,AN04G09150,AN04G05720,AN02G11790,AN02G06680,AN02G06030,AN02G02750,AN01G13690,AN01G04690
GO:CC	peroxisome	GO:0005777	2.72251e-05	4.56503	45	1311	18	12674	AN18G02980,AN18G01590,AN17G01440,AN16G07610,AN16G05570,AN16G04020,AN16G02010,AN11G02590,AN09G06740,AN09G05670,AN04G09150,AN04G05720,AN02G11790,AN02G06680,AN02G06030,AN02G02750,AN01G13690,AN01G04690
GO:CC	mitochondrion	GO:0005739	3.74529e-05	4.42651	594	1311	101	12674	AN18G06660,AN18G05890,AN18G03770,AN18G03220,AN18G01590,AN17G01480,AN16G07410,AN16G07110,AN16G03910,AN16G03390,AN15G05790,AN15G03210,AN15G02360,AN14G06290,AN14G06000,AN14G04400,AN14G04180,AN14G04080,AN14G04040,AN14G04010,AN14G02250,AN14G00700,AN14G00310,AN14G00250,AN14G00240,AN12G08360,AN12G07850,AN12G07580,AN12G04780,AN12G01480,AN11G10450,AN11G09970,AN11G06930,AN11G06630,AN11G05710,AN11G04810,AN1…
GO:CC	oxidoreductase complex	GO:1990204	6.55329e-05	4.18354	30	1311	14	12674	AN18G05890,AN15G05510,AN14G04400,AN14G04080,AN09G06650,AN08G00210,AN07G06840,AN07G03170,AN04G05640,AN04G04750,AN02G04660,AN01G08950,AN01G06180,AN01G06110
GO:CC	endoplasmic reticulum part	GO:0044432	0.000210123	3.67753	190	1311	42	12674	AN18G05910,AN18G03580,AN16G08830,AN16G08820,AN16G08570,AN16G07970,AN16G03640,AN16G03550,AN15G06470,AN15G01520,AN12G04000,AN11G10720,AN11G04180,AN11G02760,AN08G10650,AN08G03960,AN08G00560,AN07G09280,AN07G04190,AN07G03740,AN06G01540,AN06G01360,AN05G00140,AN04G09170,AN04G07090,AN04G06200,AN04G03495,AN04G02480,AN03G06410,AN03G04340,AN02G14560,AN02G13570,AN02G04860,AN02G01690,AN02G01510,AN01G13220,AN0…
GO:CC	organelle envelope	GO:0031967	0.000261666	3.58225	314	1311	60	12674	AN18G05890,AN18G04110,AN16G08460,AN16G07410,AN16G03390,AN16G02150,AN14G06000,AN14G04980,AN14G04400,AN14G04180,AN14G04080,AN14G04040,AN14G02250,AN14G00700,AN14G00250,AN14G00240,AN12G08100,AN12G04000,AN11G09970,AN11G04180,AN11G02760,AN11G02140,AN11G01510,AN09G06650,AN09G06290,AN08G02280,AN08G00560,AN08G00210,AN07G10100,AN07G07880,AN07G04190,AN07G01520,AN04G09170,AN04G08800,AN04G07090,AN04G05720,AN0…
GO:CC	envelope	GO:0031975	0.000261666	3.58225	314	1311	60	12674	AN18G05890,AN18G04110,AN16G08460,AN16G07410,AN16G03390,AN16G02150,AN14G06000,AN14G04980,AN14G04400,AN14G04180,AN14G04080,AN14G04040,AN14G02250,AN14G00700,AN14G00250,AN14G00240,AN12G08100,AN12G04000,AN11G09970,AN11G04180,AN11G02760,AN11G02140,AN11G01510,AN09G06650,AN09G06290,AN08G02280,AN08G00560,AN08G00210,AN07G10100,AN07G07880,AN07G04190,AN07G01520,AN04G09170,AN04G08800,AN04G07090,AN04G05720,AN0…
GO:CC	membrane	GO:0016020	0.000353388	3.45175	2741	1311	350	12674	AN18G06050,AN18G05910,AN18G05670,AN18G05640,AN18G04430,AN18G04290,AN18G04260,AN18G03670,AN18G03580,AN18G02170,AN18G01760,AN18G01150,AN18G00070,AN18G00030,AN17G02080,AN17G02030,AN17G01945,AN17G01795,AN17G01550,AN17G01440,AN17G01000,AN17G00940,AN17G00330,AN17G00170,AN16G08830,AN16G08820,AN16G08570,AN16G08330,AN16G08080,AN16G07970,AN16G07610,AN16G07420,AN16G07410,AN16G06820,AN16G06350,AN16G05920,AN1…
GO:CC	mitochondrial envelope	GO:0005740	0.00131851	2.87992	217	1311	44	12674	AN18G05890,AN16G07410,AN16G03390,AN14G06000,AN14G04400,AN14G04180,AN14G04080,AN14G04040,AN14G02250,AN14G00700,AN14G00250,AN14G00240,AN11G09970,AN11G02760,AN11G02140,AN09G06650,AN09G06290,AN08G02280,AN08G00560,AN08G00210,AN07G10100,AN07G07880,AN04G09170,AN04G08800,AN04G07090,AN04G05720,AN04G05640,AN04G04060,AN04G00130,AN03G03360,AN02G12770,AN02G04860,AN02G04660,AN02G04520,AN02G01730,AN01G13930,AN0…
GO:CC	microbody part	GO:0044438	0.00140369	2.85273	20	1311	10	12674	AN18G02980,AN17G01440,AN16G07610,AN16G04020,AN11G02590,AN04G09150,AN04G05720,AN02G06680,AN02G02750,AN01G04690
GO:CC	peroxisomal part	GO:0044439	0.00140369	2.85273	20	1311	10	12674	AN18G02980,AN17G01440,AN16G07610,AN16G04020,AN11G02590,AN04G09150,AN04G05720,AN02G06680,AN02G02750,AN01G04690
GO:CC	membrane part	GO:0044425	0.00167478	2.77604	2552	1311	324	12674	AN18G06050,AN18G05910,AN18G04430,AN18G04290,AN18G04260,AN18G03670,AN18G03580,AN18G02170,AN18G01760,AN18G01150,AN18G00070,AN18G00030,AN17G02080,AN17G02030,AN17G01945,AN17G01795,AN17G01550,AN17G01440,AN17G01000,AN17G00940,AN17G00330,AN17G00170,AN16G08830,AN16G08820,AN16G08570,AN16G08330,AN16G08080,AN16G07970,AN16G07610,AN16G07420,AN16G07410,AN16G06820,AN16G06350,AN16G05920,AN16G05720,AN16G03650,AN1…
GO:CC	endoplasmic reticulum	GO:0005783	0.00180699	2.74304	355	1311	63	12674	AN18G05910,AN18G04260,AN18G03580,AN18G02020,AN17G02030,AN17G01440,AN16G08830,AN16G08820,AN16G08570,AN16G07970,AN16G05150,AN16G03640,AN16G03550,AN15G06470,AN15G05510,AN15G01520,AN14G06910,AN14G00280,AN12G04000,AN11G10720,AN11G04180,AN11G02760,AN11G02590,AN11G02230,AN09G03250,AN08G10650,AN08G03960,AN08G00560,AN07G09280,AN07G09170,AN07G04190,AN07G03740,AN06G01540,AN06G01360,AN05G00140,AN04G09170,AN0…
GO:CC	mitochondrial part	GO:0044429	0.00471197	2.3268	314	1311	56	12674	AN18G05890,AN17G01480,AN16G07410,AN16G03390,AN15G05790,AN15G02360,AN14G06000,AN14G04400,AN14G04180,AN14G04080,AN14G04040,AN14G02250,AN14G00700,AN14G00250,AN14G00240,AN12G07850,AN11G09970,AN11G05710,AN11G02760,AN11G02140,AN09G06670,AN09G06650,AN09G06290,AN08G10530,AN08G02280,AN08G00560,AN08G00210,AN07G10100,AN07G07880,AN07G06840,AN04G09170,AN04G08800,AN04G07090,AN04G06020,AN04G05720,AN04G05640,AN0…
GO:CC	bounding membrane of organelle	GO:0098588	0.00476991	2.32149	285	1311	52	12674	AN17G01550,AN17G01440,AN16G08830,AN16G07610,AN16G04020,AN16G03320,AN16G02460,AN15G01520,AN15G01510,AN14G06000,AN13G00290,AN11G05000,AN11G04310,AN11G03290,AN11G02760,AN11G02590,AN09G06290,AN09G03630,AN09G03250,AN08G10650,AN08G03270,AN08G02280,AN08G01060,AN08G00210,AN07G06030,AN06G01630,AN06G01360,AN05G00200,AN05G00140,AN04G09170,AN04G09150,AN04G07090,AN04G02480,AN04G02070,AN03G04340,AN02G10440,AN0…
GO:CC	endoplasmic reticulum membrane	GO:0005789	0.00610725	2.21415	175	1311	36	12674	AN18G05910,AN18G03580,AN16G08830,AN16G08820,AN16G08570,AN16G07970,AN16G03640,AN16G03550,AN15G06470,AN15G01520,AN12G04000,AN08G10650,AN08G03960,AN08G00560,AN07G09280,AN07G04190,AN07G03740,AN06G01540,AN06G01360,AN05G00140,AN04G09170,AN04G03495,AN04G02480,AN03G06410,AN03G04340,AN02G14560,AN02G13570,AN02G04860,AN02G01690,AN02G01510,AN01G13070,AN01G09480,AN01G08980,AN01G08420,AN01G04730,AN01G04320
GO:CC	endomembrane system	GO:0012505	0.00880467	2.05529	631	1311	96	12674	AN18G05910,AN18G04260,AN18G04110,AN18G03580,AN18G02020,AN17G02030,AN17G01550,AN17G01440,AN16G08830,AN16G08820,AN16G08570,AN16G08460,AN16G07970,AN16G05150,AN16G03650,AN16G03640,AN16G03550,AN16G03320,AN16G02460,AN16G02150,AN15G06470,AN15G05750,AN15G05510,AN15G01520,AN15G01510,AN15G00470,AN14G06910,AN14G04980,AN14G00280,AN13G00290,AN12G08100,AN12G04000,AN11G10780,AN11G10720,AN11G04310,AN11G04180,AN1…
GO:CC	respirasome	GO:0070469	0.0152919	1.81554	25	1311	10	12674	AN14G04400,AN14G04080,AN11G04810,AN09G06650,AN07G03170,AN04G05640,AN02G04660,AN02G01830,AN01G08910,AN01G06180
GO:CC	mitochondrial membrane	GO:0031966	0.0252927	1.59701	194	1311	37	12674	AN16G07410,AN16G03390,AN14G06000,AN14G04400,AN14G04180,AN14G04080,AN14G04040,AN14G00700,AN14G00250,AN14G00240,AN11G02760,AN11G02140,AN09G06650,AN09G06290,AN08G02280,AN08G00560,AN08G00210,AN07G07880,AN04G09170,AN04G08800,AN04G07090,AN04G05640,AN03G03360,AN02G12770,AN02G04860,AN02G04660,AN02G04520,AN02G01730,AN01G13930,AN01G10190,AN01G09480,AN01G08910,AN01G08560,AN01G07650,AN01G07190,AN01G06180,AN0…
GO:CC	nuclear outer membrane-endoplasmic reticulum membrane network	GO:0042175	0.031605	1.50024	189	1311	36	12674	AN18G05910,AN18G03580,AN16G08830,AN16G08820,AN16G08570,AN16G07970,AN16G03640,AN16G03550,AN15G06470,AN15G01520,AN12G04000,AN08G10650,AN08G03960,AN08G00560,AN07G09280,AN07G04190,AN07G03740,AN06G01540,AN06G01360,AN05G00140,AN04G09170,AN04G03495,AN04G02480,AN03G06410,AN03G04340,AN02G14560,AN02G13570,AN02G04860,AN02G01690,AN02G01510,AN01G13070,AN01G09480,AN01G08980,AN01G08420,AN01G04730,AN01G04320
GO:CC	integral component of membrane	GO:0016021	0.0366074	1.43643	2351	1311	291	12674	AN18G06050,AN18G04430,AN18G04290,AN18G04260,AN18G03670,AN18G03580,AN18G02170,AN18G01760,AN18G01150,AN18G00070,AN18G00030,AN17G02080,AN17G02030,AN17G01795,AN17G01550,AN17G01440,AN17G01000,AN17G00940,AN17G00330,AN17G00170,AN16G08830,AN16G08570,AN16G08330,AN16G08080,AN16G07970,AN16G07610,AN16G07420,AN16G06820,AN16G06350,AN16G05920,AN16G05720,AN16G03650,AN16G03640,AN16G03550,AN16G03300,AN16G02930,AN1…
GO:CC	intrinsic component of membrane	GO:0031224	0.0450465	1.34634	2358	1311	291	12674	AN18G06050,AN18G04430,AN18G04290,AN18G04260,AN18G03670,AN18G03580,AN18G02170,AN18G01760,AN18G01150,AN18G00070,AN18G00030,AN17G02080,AN17G02030,AN17G01795,AN17G01550,AN17G01440,AN17G01000,AN17G00940,AN17G00330,AN17G00170,AN16G08830,AN16G08570,AN16G08330,AN16G08080,AN16G07970,AN16G07610,AN16G07420,AN16G06820,AN16G06350,AN16G05920,AN16G05720,AN16G03650,AN16G03640,AN16G03550,AN16G03300,AN16G02930,AN1…

## Sheet: 9-12h M pca_loadings
	PC1	PC2	PC3	PC4	PC5	PC6	PC7	PC8	PC9	PC10
Aspni5_57211	-0.001824	0.0085621	-0.0011122	-0.004549	0.0019245	-0.0035384	-0.0018599	0.0033856	-0.00059233	-0.0017106
Aspni5_56930	-0.0059981	0.0059252	-0.0042513	0.0061746	0.0022923	0.0056781	0.0043599	0.0046736	1.8662e-05	-0.0020292
Aspni5_56861	-0.0022216	-0.0040631	-0.0048791	0.004607	-0.0011816	-0.0065219	-0.0006157	-0.0034366	0.010126	0.0034239
Aspni5_56745	0.0024882	0.0027112	-0.0010247	-0.0053723	0.00078023	-0.0028396	0.00055683	-0.00095609	-0.00018732	-0.0014169
Aspni5_56472	-0.00025308	0.0038251	-0.0061315	-0.0057649	0.0014879	-0.0035139	0.0022654	0.0016303	0.0018918	-0.0016572
Aspni5_56429	0.0022145	0.0032779	0.00096616	-0.0070381	-9.1071e-05	-0.002939	-0.0010442	-0.00032945	0.00058688	-0.0011391
Aspni5_56338	0.0052148	0.0022299	-0.0031256	0.0139	0.010914	0.0063832	0.0051966	0.0026019	-0.0059694	-0.0021798
Aspni5_56296	-0.0023638	0.0049256	-0.0026271	-7.1375e-05	-0.0033576	-0.0025062	0.0016933	-0.001197	0.0092679	-0.0035312
Aspni5_56154	-0.00013552	0.0035746	-0.0049144	-0.0031026	-0.0018244	2.2767e-05	0.00098034	-0.0028774	-0.0033249	0.0019191
Aspni5_56064	0.0035084	0.0008737	0.0010579	6.0761e-05	8.2459e-06	-0.0028307	0.0023582	-0.0015228	0.0014953	0.003935
Aspni5_55758	0.0020984	-0.0065071	0.010348	-0.0050039	0.0024238	0.0014045	0.00034727	-0.0030293	-0.0018111	-0.00063978
Aspni5_55645	-0.001796	-0.00091943	0.00075968	0.0038621	0.002327	-0.00074586	-0.0030685	-0.0020774	-0.0020858	0.0066882
Aspni5_55567	-0.009285	0.0010555	0.0054735	0.0042675	0.0041984	-0.003806	0.0013995	-0.0011866	0.0026645	-0.0015484
Aspni5_55543	-0.0019324	0.0026411	-0.0055085	-0.0043354	-0.0028471	-0.0041619	-0.0022264	-0.001319	-0.0017958	0.0002653
Aspni5_55495	-0.0024447	0.0020903	0.0046453	-0.0028197	0.002868	-0.0021036	0.0019083	-0.00048912	0.0012332	-0.0041903
Aspni5_55209	0.0065468	0.0069173	-0.010143	0.010311	0.0024374	0.006796	0.0025676	-0.0071122	-0.010084	0.0023666
Aspni5_55153	0.0025399	0.0012105	0.0032937	0.0087597	0.0076359	0.0085962	-0.0038808	0.0086626	0.0016405	-0.0043359
Aspni5_55148	-0.010561	-0.0026298	-0.0019432	9.6032e-05	-0.0013953	-0.005215	-0.0029344	0.0026791	0.00039303	-0.0025448
Aspni5_55058	0.006294	-0.00086937	0.0079051	0.0059739	0.0067725	0.00067697	0.0037223	-0.0044004	0.00016798	-0.0025565
Aspni5_54922	-0.002588	-0.005895	-0.0022978	-0.001115	-0.0037535	0.0065463	-0.0027724	0.00042432	0.0012156	-0.0018536
Aspni5_54869	-0.00029087	-0.0036071	-0.022322	0.013849	-0.0012155	0.01583	-0.018551	-0.0064487	0.014975	-0.0071193
Aspni5_54867	0.025606	-0.00094074	0.0027489	-0.0057947	0.0017043	-0.0046934	0.002834	-0.00060444	-0.010466	0.0019148
Aspni5_54865	-0.010512	-0.00516	-0.0015697	0.021832	0.002569	0.0052224	-0.014059	0.01303	0.011557	0.001569
Aspni5_54844	0.0093686	0.0034371	-0.014228	-0.016326	-0.0038661	-0.0078587	-0.01312	-0.0035365	0.0019371	0.011724
Aspni5_54765	0.0015859	0.0034844	-0.0050231	-0.00057552	0.00024389	-0.0044684	0.00016498	0.0011247	0.00010425	0.00016611
Aspni5_54678	-0.0035937	-0.0005967	-0.0049257	-0.0014437	0.006189	-0.0049438	-0.0030983	0.0037042	0.00048118	0.0009339
Aspni5_54575	0.0013321	0.0031644	-0.0040428	-0.0010284	-0.002663	-0.0024449	0.0021376	-0.0030298	0.0021738	-0.0010973
Aspni5_54440	0.0056348	-0.010817	0.0056186	0.0019431	0.0096956	0.0017576	0.0052438	-0.0049344	-0.00067873	-0.0024893
Aspni5_54433	-0.003023	0.0045987	-0.0020697	-0.0083927	0.0013726	-3.7311e-05	0.0023621	0.0031299	0.0047635	-0.0060903
Aspni5_54391	0.0033873	0.0044416	-0.0083812	0.0029308	-0.00053593	-0.001959	0.0011568	-8.4386e-05	-0.00063286	0.0002218
Aspni5_54374	0.0021691	-0.010942	0.00093288	-0.0082751	0.0036253	0.009147	0.014294	-0.0069727	0.0072611	-0.0039297
Aspni5_54287	0.00065469	0.0062371	-0.0045763	-0.0014054	-0.0011249	-0.00054118	-0.00098117	0.0020252	0.0025029	-0.0019381
Aspni5_54270	0.0019239	0.0050653	-0.010403	-0.0024349	-0.0039967	-0.00025022	0.001935	0.0024889	-0.00038224	0.0033095
Aspni5_54235	0.0045526	0.0046068	0.0003044	-0.0015287	0.0035282	-0.0016129	-0.0089061	0.0067608	-0.002882	-0.0022967
Aspni5_53982	0.0089664	0.014456	-0.010293	-0.014988	-0.012459	0.022012	0.012732	0.0054929	0.026239	-0.0021696
Aspni5_53980	-0.0024116	0.0024951	-0.016934	0.0077087	-0.0044478	-0.0091309	0.002572	0.0020064	-0.0075544	0.0080395
Aspni5_53947	0.0012959	-0.0054951	0.0058324	-0.0079219	0.0015681	0.00052274	-0.0011559	-0.0032182	-0.0028153	-0.0034141
Aspni5_53927	0.0017608	0.0019874	-0.00063469	-0.0078223	-0.0011506	-0.0012935	0.0015922	0.0020414	0.0013992	-0.0039139
Aspni5_53845	-0.020483	-0.0056163	0.0051017	0.0045154	0.0059255	0.0073689	0.0091332	0.0038776	0.0053923	-0.0037164
Aspni5_53706	0.0087156	-0.0063709	0.011534	0.0091213	0.0034959	-0.0052723	-0.0045892	-0.010582	0.0002002	-0.0010657
Aspni5_53668	-0.0071321	0.0053167	-0.00031032	0.00012807	0.0014137	-0.0015187	0.0010143	-0.0026171	0.0016585	0.0019798
Aspni5_53663	0.0039858	0.0026607	-0.0018235	0.0041231	0.0015694	3.3866e-05	-0.0013598	0.0029317	0.00125	0.0074277
Aspni5_53657	0.0035097	0.0017546	-0.0019867	0.0021394	0.00068376	0.0020921	0.0019414	-0.0021736	0.0001526	-0.00041006
Aspni5_53656	-0.0030457	-0.0022504	-0.010767	0.0036363	0.0087011	0.002581	0.0023442	-0.0076014	-0.0073152	0.0018602
Aspni5_53655	-0.00036732	0.0019416	-0.001822	0.0028298	0.0063722	0.0016203	0.0028001	0.0010612	-0.0020993	-7.5042e-05
Aspni5_53574	0.0060951	0.0079551	-0.0040262	-0.0065913	-4.3147e-05	0.000659	-0.00061663	0.0087996	0.00081142	-0.0043096
Aspni5_53555	0.0090988	-0.01567	0.015676	-0.012476	0.0031701	-0.0018302	0.0010261	-0.0008742	-0.0037966	-0.0020251
Aspni5_53364	-0.0022719	0.0010379	0.0021228	-0.0086322	-0.00098269	-0.0013995	-0.0022775	-0.0037117	0.0022614	-0.0048697
Aspni5_53357	0.00069523	0.0013543	-0.0017955	0.013305	0.0025568	-0.0060272	-0.0045389	-0.0006851	-0.0018749	-0.0011311
Aspni5_53348	-0.0014881	0.0015367	0.0012935	-0.0026395	0.0064565	0.00096333	0.0037821	-0.00020494	0.0029061	-0.0065475
Aspni5_53188	0.0043333	-0.011312	0.0081443	-0.0055121	0.0069568	0.00071287	-0.0028111	0.0015038	-0.0052137	-0.0025678
Aspni5_53152	-0.0075708	0.006832	-0.0063197	0.0073802	0.0013521	0.0014655	0.0016457	0.0020173	-0.0016695	-0.0036549
Aspni5_53146	-0.00035693	0.0024486	0.0045711	-0.0037168	0.0032751	-0.00087768	-0.00019171	0.00086989	-0.00076738	-0.0048625
Aspni5_53140	0.0041264	0.0052072	-0.00046808	0.00092774	0.00037923	-0.0011064	0.0008154	-0.0018961	-0.0016807	-0.00015357
Aspni5_53116	-0.0019937	0.0058153	-0.0033898	-0.0027289	-0.0019389	-0.0030372	-0.00010947	-0.00061689	0.0023482	0.0015793
Aspni5_53115	-0.0020358	0.0048477	-0.0013346	-0.0034947	0.0020972	-0.0019171	-2.3762e-05	0.0013943	0.0010067	-0.0020577
Aspni5_53033	0.0022978	0.00062469	-0.0027241	0.0061494	0.0038785	0.0007291	0.0032843	0.00017208	-0.0027028	-0.0014505
Aspni5_53015	-0.0010197	0.0060508	-0.0061105	-0.0065462	-0.00064703	-0.0055134	-0.0083	0.0024928	-0.0014634	0.0016595
Aspni5_52903	-0.0063484	0.0051951	-0.002383	-0.0026429	-0.0040459	-0.0043245	-0.002436	0.0011347	0.0015136	0.0025534
Aspni5_52853	-0.0058808	-0.00028387	-0.0061777	-0.0073283	-0.0030817	-0.0015726	-0.0070614	0.0015116	-0.0019152	0.00044748
Aspni5_52848	0.0067991	0.00052867	-0.015609	-0.0042609	0.0080298	-0.0010254	0.0068443	0.014486	-0.013774	-0.01847
Aspni5_52774	0.001109	0.010788	0.0092175	-0.0098844	0.01411	0.0020097	-0.006799	0.0019083	-0.0084665	-0.014769
Aspni5_52498	0.0055006	0.0088353	-0.0077839	0.0075739	-4.4072e-05	-0.0066599	-0.0065432	0.017564	-0.0094683	0.010549
Aspni5_52344	-0.016397	-0.00099021	0.0018174	0.0047523	0.0025221	-0.0061658	0.00018042	-0.00012525	0.0024778	-0.00027451
Aspni5_52103	-0.019649	0.0027516	-0.010393	0.014527	0.020362	0.015489	0.0019886	0.016731	-0.0086876	-0.018296
Aspni5_52066	-0.0047709	-0.0029275	-0.0063979	-0.0035483	0.0025966	-0.0059499	-0.0002943	0.00041492	-0.0016601	0.003459
Aspni5_52063	-7.7649e-05	0.0005667	-0.0011628	0.0043699	0.0020298	-0.002313	0.0030416	-0.0040334	0.0048226	0.0014708
Aspni5_52026	0.0029057	0.0021347	-0.0031878	-0.0035171	-0.0032831	-0.00061983	0.0028344	-0.00020021	0.0021661	-0.00064817
Aspni5_52015	0.0026615	0.00096765	-0.00066551	-0.0052261	-0.0026032	-0.0035546	0.0014018	-0.00075417	0.0039714	-0.0010687
Aspni5_51987	-0.0029178	0.001491	-0.001661	-0.0040196	0.0014552	-0.0033942	-0.0012854	0.0011137	0.0033347	-0.0019145
Aspni5_51917	-0.0056018	-2.6306e-05	0.0048817	-0.0068724	0.00097978	0.0061489	0.0020223	-0.0025876	0.0047656	-0.0024888
Aspni5_51718	-0.0017132	0.0037576	-0.001218	0.0011793	-0.0025935	-0.0017049	0.0046441	-0.010083	0.012733	-0.013376
Aspni5_51629	-0.0024043	0.0050265	-0.0046139	-0.00053593	0.00042226	-0.001021	0.0018311	0.0013286	4.2687e-05	-0.0011874
Aspni5_51523	-0.00075516	-0.0088787	-0.02082	0.012516	0.0018957	-0.011299	0.0071858	0.0069575	0.027099	-0.0024347
Aspni5_51412	-0.0027367	0.0022821	-0.00016103	-0.0075341	0.0013306	-0.0061032	-0.0036451	0.0006839	0.0037035	0.001385
Aspni5_50982	-0.0035723	0.0011438	-0.0062108	-0.0047513	-0.0050632	0.00054764	0.001659	0.0011474	0.0019648	-0.0029834
Aspni5_50981	-0.014253	0.0012532	-0.004074	0.0074378	0.0016815	-0.0057813	0.0043057	-0.0013571	-0.0059903	-7.7038e-05
Aspni5_50980	0.024253	0.0012261	0.0058499	0.018537	-0.0089205	-0.0063432	0.0028846	-0.022031	0.0087022	0.0026564
Aspni5_50979	0.013371	0.021381	0.0060137	0.013969	0.011349	0.00094239	-0.0010934	0.01966	0.006496	0.0022217
Aspni5_50977	-0.0061462	0.012722	0.00034164	0.0081928	0.0056811	-0.0052588	0.0097215	-0.011222	-0.012837	0.027452
Aspni5_50976	-0.016677	0.0030707	-0.0021866	0.0023298	0.011697	-0.010247	-0.0020689	-0.0023399	-0.0018104	-0.0058217
Aspni5_50936	-0.0080574	0.036409	0.024558	-0.019045	0.0023015	0.0046548	-0.0085008	0.006337	0.0067583	0.020302
Aspni5_50930	-0.0045735	-0.0053239	-0.00076463	-0.0023807	-5.7486e-06	-0.0044989	0.00016086	-0.0034224	0.0024894	0.0010553
Aspni5_50777	-0.0027187	0.0044564	0.0034944	-0.0053158	-0.0013751	-0.0023288	-0.00159	-0.00050182	0.0022045	-0.0010944
Aspni5_50495	0.0079276	0.0038773	-0.00093384	-0.0081024	0.0014068	-0.0064268	-0.012837	-0.003412	0.00049661	0.003952
Aspni5_50237	-0.0070046	0.014981	0.0084326	-0.0077161	0.0024377	-0.005452	0.015981	-0.0074339	0.008237	0.013993
Aspni5_49900	-0.0073329	0.0034257	-0.0013115	0.013154	-0.0054973	-0.00074266	0.01574	-0.012356	-0.012832	-0.0071668
Aspni5_49696	-0.0020481	0.0018482	-0.005605	7.5352e-05	-0.0028334	-0.0041042	0.00082121	-0.00049742	0.00058177	-0.00026543
Aspni5_49603	-0.0047069	0.0023608	0.0038603	-0.0026533	-0.0021489	0.0053406	0.0019512	0.002852	0.0071565	-0.0061531
Aspni5_49598	0.014661	-0.0047143	-0.0066731	0.0096211	-0.0034575	0.0058302	0.0069858	0.011786	0.01324	0.00031617
Aspni5_49499	0.0035707	0.0011707	-0.012015	0.0070206	-0.0020073	0.0032287	0.0020513	-0.0058529	-0.0039686	0.00040963
Aspni5_49473	0.00078118	0.00017927	-0.0049152	-0.0020188	-0.0027456	-0.0029702	-0.00030576	0.0006266	0.00062269	0.00016066
Aspni5_49317	-0.0037641	-0.010423	0.0043433	0.00020043	-0.0013914	-0.011494	-0.0042825	-0.0026551	-0.0015486	-0.0031324
Aspni5_49311	-0.0043004	0.0030132	-0.0037806	-0.0015083	0.0038024	0.00068438	0.0031879	0.00044543	-0.0061237	-0.0036076
Aspni5_49276	-0.0031096	0.002273	-0.0010529	-0.0036171	-0.00054398	-0.001587	-0.00094023	-3.7598e-05	0.0029647	-0.00054932
Aspni5_49100	0.0022365	0.0040101	-0.0064506	0.0041854	-0.0033912	-0.0040902	-0.0043434	0.0058858	-0.0066983	0.0056521
Aspni5_49092	-0.0031769	0.0061699	-0.0064984	0.0026272	0.0016768	-0.0028142	-0.0035276	0.00089482	0.001797	-0.00033744
Aspni5_48902	-0.013461	0.0077918	-0.0091161	0.0069501	0.0032838	-0.0017571	0.0030764	0.00014254	-0.0026317	0.0026993
Aspni5_48025	-0.0065539	0.0014843	-0.0050409	0.01461	0.0040682	-0.007576	0.0076163	7.0477e-05	-0.0037191	0.0010482
Aspni5_47986	-0.0012102	0.0064847	-0.0048202	-0.0059174	-0.0021927	-0.0055293	-0.0051863	-0.0016741	0.00038645	0.0002668
Aspni5_47971	0.0052979	0.0039066	-0.0029569	-0.0022008	-0.001333	-0.0016598	0.0031315	-0.0037506	-0.0048183	-0.0020408
Aspni5_47911	0.0068261	0.017267	0.015026	-0.0021361	0.0021063	-0.0090872	0.01883	0.0080181	0.012563	0.018173
Aspni5_47870	-0.0067116	0.0073207	-0.0015834	0.0015673	-0.002678	0.0013394	0.0025425	-0.00212	0.0046754	-0.0050785
Aspni5_47867	0.0010516	0.0045036	-0.0031995	-0.004234	0.0015481	-0.0056409	-0.00091865	0.00020299	-0.0017268	0.00037245
Aspni5_47818	0.013538	0.021949	0.0077333	-0.002209	0.0035831	-0.0045975	0.0029607	0.0068263	0.0026768	0.0086542
Aspni5_47772	-0.022565	-0.023116	0.0028261	-0.0024806	0.0092257	-0.022696	0.0089383	0.0069454	0.0027563	-0.025993
Aspni5_47664	-0.0017322	0.0062188	-0.0016326	-0.0030388	-0.0015419	0.001635	0.0018715	0.0030275	0.0016432	-0.0022071
Aspni5_47491	-0.00097328	7.0583e-05	0.0016809	-0.0071602	0.0037472	-0.0022049	0.0009233	-5.3446e-05	0.0034162	-0.00080145
Aspni5_47240	0.011165	0.005746	0.011388	0.0023003	0.016828	0.0093711	0.012879	0.015102	0.03828	0.0097333
Aspni5_47218	0.00018544	0.0022959	0.0030733	-0.0057921	5.7233e-05	-0.0017535	0.0005901	-0.0022217	0.0023859	-0.0021887
Aspni5_46889	-0.0047265	0.0018796	-0.005726	0.0022672	-0.00075036	-0.0021914	-0.00098943	0.00039883	-0.00088634	0.0022322
Aspni5_46852	-0.0074156	0.0041016	-0.0069332	0.0017565	0.0049766	-0.00095125	-0.00073971	0.0035855	-0.0074279	-0.001044
Aspni5_46836	-0.0023647	0.0020539	-0.00061568	-0.0074389	-0.00049841	0.00087152	0.0016908	0.0018934	0.0052427	-0.0030793
Aspni5_46835	0.0064091	0.01242	-0.0019393	-0.001545	-0.00069572	0.0030285	0.00074115	-0.0017099	0.00020178	0.0064221
Aspni5_46834	-0.0026663	0.010719	0.00065446	-0.010927	0.0018353	-0.0079342	-0.00802	0.0033675	0.0020009	0.00149
Aspni5_46832	-0.00034405	0.01088	-0.01539	-0.0032198	0.0042489	-0.011511	0.0012234	0.0015952	-0.0023859	0.0025004
Aspni5_46226	0.00026443	0.00058146	-0.00076582	-0.0010444	0.0013867	-0.000263	-0.00087018	0.0020489	-0.0012764	-0.0035671
Aspni5_46170	0.0026018	-0.0034655	0.0074891	-0.005703	0.00609	0.0036475	0.0024204	0.0016443	0.0006631	-0.0066619
Aspni5_46166	-0.0022994	0.0022141	-0.00033222	0.020202	0.0033516	0.011297	-0.0018774	0.00069637	-0.002521	-0.0078243
Aspni5_46165	0.0071425	0.0023133	0.0037205	-0.0069428	0.0057482	-0.00098333	-0.0014927	0.0016434	0.0047572	-0.0012969
Aspni5_46158	0.011429	-0.02912	0.0010563	-0.017879	0.028931	0.0042936	0.03429	0.012125	0.0068578	0.025902
Aspni5_46156	-0.010202	0.013136	-0.029382	0.00038743	0.015609	-0.0076288	-0.0036499	-0.0014736	-0.0025483	0.021935
Aspni5_46155	-0.0011928	0.0038175	0.001873	0.0024722	0.002491	0.0042244	0.00078854	-0.0023379	-0.0012961	0.0084308
Aspni5_46152	0.014995	-0.0024049	0.007403	0.014767	0.0081917	-0.0056751	-0.0093177	-0.0043849	-0.0045291	0.00061644
Aspni5_46151	0.024481	-0.020887	0.028837	0.018344	-0.0016954	0.0058606	-0.011496	-0.026678	-0.016668	0.0024104
Aspni5_46150	0.0095273	0.0018263	0.003429	0.01619	0.0041181	0.0027477	-0.011685	0.0048192	-0.0055918	-0.00062714
Aspni5_46149	0.01054	0.0065103	0.0045544	0.020821	-0.0006791	0.0091023	-0.0054439	-0.0015404	0.002744	0.025888
Aspni5_46121	0.0083983	0.014665	-0.0047405	0.00082193	0.008698	0.0078194	0.024542	0.0094872	-0.021835	0.018992
Aspni5_46108	-0.0017693	0.0023494	0.0139	0.010539	-0.0060479	0.0077189	0.0029866	-0.00050073	0.0046826	0.016215
Aspni5_46107	0.00016862	0.0066139	-0.0079271	0.0017543	-0.0017023	0.0080946	0.0076618	-0.0035818	0.0045851	-0.010455
Aspni5_46105	-0.0015231	0.0039833	-0.0027487	-0.0093461	0.0035742	0.0056412	0.0059563	0.00076664	0.0026781	-0.0054969
Aspni5_46101	0.016349	-0.00043225	-0.048306	0.014188	0.012998	0.016291	0.0073837	0.0096081	0.006962	0.003228
Aspni5_46100	0.0054048	-0.0010732	-0.0094353	-0.00094302	-0.0017906	0.0020982	0.0042742	-0.006038	-0.0018507	-0.0027468
Aspni5_46099	0.0091939	0.0054165	-0.0083976	0.0047063	0.0030028	0.0090611	0.0055007	-0.0075422	-0.010348	-0.001897
Aspni5_46070	-0.0010665	-0.0012869	-0.0164	-0.00060141	-0.0081708	0.0024127	-0.00028687	-0.018082	0.00017613	0.0071579
Aspni5_46066	0.0066953	0.0072695	0.0033556	0.0045439	-0.0046864	0.0012056	0.0056022	-0.0077284	-0.0075477	0.0045256
Aspni5_46053	-0.0015087	0.0077275	6.1787e-05	-0.0060292	0.0077991	-0.013546	-0.0045007	0.0070938	0.0066459	-0.0086085
Aspni5_46035	0.001261	-0.0033439	-0.0027316	0.00042994	0.0022573	0.0065725	-0.00039908	-0.0066795	-0.008579	-0.0089473
Aspni5_46024	-0.007269	-0.0041891	-0.0068739	-0.0043273	-0.00081605	-0.0030866	-0.0042244	0.0013656	0.0019641	0.0024452
Aspni5_45996	0.0010234	0.00035188	-0.0013895	-0.00098566	0.0019049	0.0018075	-0.00074412	-0.0020853	-0.0034343	-0.0008273
Aspni5_45974	-0.0049908	-0.0010035	-0.011327	-0.0042165	-0.0058014	-0.0022349	-0.004803	-0.012003	-0.0022925	0.0051321
Aspni5_45936	0.0019798	-0.006816	0.0022007	-0.019772	0.010129	-0.0025985	-0.0029128	-0.0074343	-0.0099336	-0.0019162
Aspni5_45864	-0.00045807	0.00028483	-0.0077064	-0.0080214	-0.0023774	-0.0010863	0.0066327	0.0019621	0.0060113	-0.0059161
Aspni5_45859	-2.4871e-05	0.0027198	-0.009734	0.00011359	-0.005009	-0.00085642	0.0045331	-0.0033431	0.002186	0.0016358
Aspni5_45843	0.0051681	0.0043879	0.0026499	0.0067977	-0.0036931	0.011341	0.00061455	0.011406	0.026537	-0.017577
Aspni5_45840	-0.00098883	-0.0041569	0.00099461	0.0021978	0.006873	-0.0027021	0.0044313	-0.011534	0.0024117	0.018887
Aspni5_45837	-0.0053702	0.0066102	-0.0075595	0.0037248	0.0020257	0.0059354	0.00053737	0.0069616	-0.0043167	0.0026226
Aspni5_45833	-0.0029109	-0.00019131	0.0095392	-0.0016159	-0.0033932	-0.001302	0.012953	-0.0087674	-0.018884	0.0041831
Aspni5_45672	0.0049943	-0.0058399	0.017128	0.015608	-0.007049	0.0060539	-0.0070003	-0.0029682	0.025154	-0.0075322
Aspni5_45633	-0.0038654	0.0052515	-0.0091816	0.0038293	0.011944	-0.0055254	-0.0031246	-0.0020627	-0.0065326	0.0019118
Aspni5_45623	0.0045114	0.035791	0.027872	0.0035537	0.0033921	0.012589	0.0056754	-0.004056	0.0028042	0.0012743
Aspni5_45622	-0.0059975	0.026536	0.014256	0.0063421	0.002624	0.013139	0.0075789	-0.0070282	0.01025	-0.0025923
Aspni5_45611	0.0010956	-0.0007411	-0.0079607	-0.0081032	-0.0029129	-0.003638	-0.0067879	-0.0026938	-0.0029892	-0.005466
Aspni5_45547	-0.0042713	0.0087749	-0.0070958	-0.0030896	0.0010672	-0.0026323	-0.00084698	0.0008294	-0.0022559	-0.0024169
Aspni5_45519	0.0081234	-0.0030195	0.010338	-0.0058646	0.012689	0.012387	-0.021471	0.016322	-0.021818	0.022611
Aspni5_45491	-0.0033961	0.0034188	0.0010419	0.0053816	-0.001528	-0.00098707	-0.0021278	-0.0015299	0.00045472	0.0028689
Aspni5_45472	-0.0033336	-0.00047913	0.0019884	-0.0027662	-0.00098876	-0.0074042	0.00080931	-0.0034336	0.0054025	-0.00045109
Aspni5_45464	0.0089013	-0.010798	-0.0022611	-0.018567	0.026869	0.012716	0.013354	0.0053573	0.0028373	0.020932
Aspni5_45444	8.015e-05	0.0048068	-0.0024342	0.00015732	-0.0031524	0.00041596	0.0041888	-0.0023204	7.1195e-05	-0.0019249
Aspni5_45443	-0.0018953	0.005637	-0.0010832	-0.012583	-0.00057431	0.016788	-0.0029624	0.0073956	0.0026683	0.0086035
Aspni5_45371	-0.0034596	-0.011329	0.0044768	-0.0014052	0.0042228	-0.0017573	0.0019916	-0.00054416	-0.0020406	-0.00089677
Aspni5_45331	-0.0024266	-0.002727	0.0032789	0.001758	0.0033482	0.004602	0.002841	-0.0030579	0.01014	0.0020137
Aspni5_45302	0.018144	0.0092877	0.034706	-0.0012823	0.017994	0.015302	-0.0076024	-0.0015868	-0.0048475	0.040294
Aspni5_45301	-0.0041629	-0.0014586	0.0055358	0.00054218	-0.0012038	-0.002593	0.0015584	0.0022255	-0.0025325	0.0034359
Aspni5_45263	0.00039386	0.0079289	-0.0067735	-9.9217e-05	-0.002109	-0.0033089	-0.00014005	0.00099822	0.0013374	0.00048355
Aspni5_45201	-0.0010371	-0.0054558	-0.0038173	-0.0069899	0.0094084	-0.0021771	-0.00095541	-0.00088991	0.0009986	-0.0012873
Aspni5_45191	-0.0049067	0.0010719	-7.5962e-05	-0.029845	-0.0068063	-0.022581	0.015682	-0.023955	-0.016238	0.010502
Aspni5_45189	-0.013842	0.0053316	-0.006684	-0.0079237	0.0072937	-0.00013354	-0.003365	0.010589	-0.0069552	0.015092
Aspni5_45173	0.0010616	-0.014413	0.0052613	-0.0081569	0.012074	0.0036373	-0.0010936	0.00024658	-0.0091268	0.0029759
Aspni5_45060	0.01274	0.0074909	0.0084077	-0.0034142	0.018277	0.0041017	-0.0020673	0.0090268	-0.0011222	-0.036305
Aspni5_45057	0.0013066	0.0059314	-0.0044984	-0.00071942	-0.0043692	-0.0021248	0.001043	-0.00064724	0.00090463	-0.00076666
Aspni5_45051	0.00077073	-0.0067575	-0.0041034	0.0072127	0.0081282	-0.00090213	-0.0026549	0.0030508	-0.014037	-0.001003
Aspni5_45045	-0.00028922	0.0060949	-0.0062441	-0.0027819	-0.0018746	-0.0022051	0.0022744	-0.0054069	0.00379	0.0061407
Aspni5_45042	-0.010199	-0.0022327	0.0023622	0.016245	0.01256	-0.00094027	-0.0069999	-0.0030882	-0.0003974	0.0013544
Aspni5_45041	-0.01489	0.014477	0.00010278	0.024429	0.015197	0.015185	-0.011581	0.0060317	-0.004297	0.011299
Aspni5_45038	-0.0089262	-0.011286	-0.0040268	-0.0079391	0.013468	0.020114	-0.0078061	-0.0083567	0.011209	-0.017656
Aspni5_45037	-0.0037825	0.0079682	-0.0093969	0.0016923	-0.0037904	-0.0010601	0.0012564	0.0028932	0.0055901	-0.0014846
Aspni5_45023	0.013319	-0.014274	-0.026735	0.0028078	0.026345	-0.03804	0.02164	-0.0067861	-0.0052723	-0.0064663
Aspni5_45003	-0.0012864	0.00050911	0.00092968	-0.00086728	0.00063662	0.006181	-0.00054835	0.0022292	-0.0022635	-0.00027486
Aspni5_44987	-0.0025238	0.0020136	0.0018805	-0.016749	0.0087075	0.0014764	-0.012867	-0.0070564	0.010891	0.012471
Aspni5_44973	0.022684	-0.02645	-0.030524	-0.022664	-0.017438	-0.02171	-0.029282	0.013878	-0.00067521	-0.0044309
Aspni5_44972	0.011529	-0.0037269	-0.012865	-0.01821	0.013466	-0.044219	-0.04283	0.00043283	0.040099	-0.012835
Aspni5_44964	0.011898	-0.0045611	-0.019158	-0.010785	0.010244	-0.0095694	0.024604	-0.0095079	0.019736	0.011323
Aspni5_44959	-0.0027391	0.0391	0.031675	-0.032741	0.0021215	-0.0041113	-0.014647	-0.0084861	0.0092368	0.04122
Aspni5_44958	-0.0051743	0.021322	0.013552	-0.016192	-0.0096167	-0.0042232	-0.001597	0.0014634	-0.014207	0.024303
Aspni5_44955	0.0054518	-0.016071	0.00053953	-0.0015721	0.0098925	0.016591	0.010945	-0.0020298	0.010254	0.0014404
Aspni5_44952	-0.0072033	-0.0039824	-0.021562	-0.015821	0.020361	0.024289	0.024538	-0.0024326	-0.0093655	0.010616
Aspni5_44951	-0.0094138	-0.0024371	-0.021003	-0.0014575	0.010248	0.019586	0.01711	-0.017339	0.0094113	-0.0087594
Aspni5_44938	0.0027104	-0.00048727	-0.00096676	-0.00082149	0.0003445	0.003488	0.0032212	-0.0043492	0.0099402	-0.0074678
Aspni5_44933	-0.0042301	0.008085	0.0027851	-0.0061727	0.0082377	0.0087809	0.013194	-0.027441	-0.0080606	-0.014255
Aspni5_44930	-0.0014494	0.018697	-0.014644	-0.0094104	-0.017881	-0.00050604	0.0018408	0.003714	0.010454	-0.0042622
Aspni5_44913	0.014989	-0.0029565	0.00036562	0.028562	-0.016304	-0.015085	0.0094043	-0.010065	0.0025092	0.014121
Aspni5_44892	0.0017404	0.0080933	0.013705	0.0037105	0.0045925	0.0090406	0.011743	-0.028841	0.0031968	0.011825
Aspni5_44834	-0.0010045	0.0022485	0.0030819	-0.0032367	0.0036284	-0.00053312	0.008029	-0.00365	0.0071528	-0.0034345
Aspni5_44802	0.018954	0.015583	0.012144	0.015071	0.020454	-0.0022931	0.0082772	0.010953	0.0019629	-0.0030214
Aspni5_44770	0.0061545	-0.0013134	-0.0026385	-0.0063305	0.0074266	0.0021281	-0.0055934	-0.0096122	-0.0048039	0.0036498
Aspni5_44750	-0.00013334	0.0021294	0.0029012	-6.9548e-05	0.0014555	-0.0014885	-0.0032245	0.0030362	0.0024521	0.0050374
Aspni5_44688	0.0002048	0.0061744	-0.0071394	-0.0025434	-0.0027773	-0.000233	0.00020305	-0.0018167	-0.0023838	-0.0011183
Aspni5_44668	0.0059915	-0.00022085	0.003921	0.003911	0.0089741	-0.0038976	0.0024264	0.0040842	0.0042322	0.0010027
Aspni5_44636	0.0016933	0.0031426	0.0024953	0.0019631	0.004859	-0.00032253	-0.0053118	0.0050559	-0.0028509	-0.013385
Aspni5_44635	-0.006378	0.0026696	-0.0057658	-0.0022471	0.0033932	-0.0022344	0.0030592	-0.00011344	0.0065643	-0.0026834
Aspni5_44632	-0.0044242	0.0014282	0.0061696	-0.0077955	8.0383e-05	-0.0014865	0.00087688	-0.0089432	0.005525	-0.0076624
Aspni5_44614	-0.0074739	0.0032231	0.00015822	-0.00045634	0.0066168	-0.0037021	0.0025228	-0.003865	0.0026692	-0.0051662
Aspni5_44600	-0.0097317	0.0038051	-0.0047282	-0.0098676	-0.0094977	0.011849	0.0078119	0.009512	0.012999	-0.011693
Aspni5_44589	0.01524	0.011251	-0.0077697	-0.0024774	-0.017381	0.0033806	0.028917	0.0056258	0.02463	-0.0069485
Aspni5_44558	-0.019257	0.00069109	0.001291	0.021964	0.0035894	-0.021346	-9.4796e-05	0.0027595	-0.0040481	-3.5165e-05
Aspni5_44483	-3.2672e-05	-0.0025131	-0.0050406	-0.00055619	0.0015736	-0.0010287	-0.001249	0.0044055	-2.2819e-05	-0.0016268
Aspni5_44476	0.0044749	-0.0076677	0.0058357	0.009242	0.016223	-0.0040185	-0.022607	0.0012254	0.020819	0.036962
Aspni5_44465	0.00065688	0.0039747	-0.00098651	-0.0029421	0.00017523	-0.00094412	0.00060202	0.0022073	-0.0037924	0.00091334
Aspni5_44445	0.0039406	0.0092909	0.0022176	0.0030622	0.011221	0.0094036	-0.0041965	-0.0070178	-0.0083453	-0.00050292
Aspni5_44366	-0.0041998	-0.0039713	0.0001032	0.0036183	0.0061551	-0.0059002	0.0051575	-0.001097	0.0019276	0.0011321
Aspni5_44365	-0.0014143	0.0039457	0.00044101	-0.0017483	0.00037841	0.00010029	-0.00067731	-0.0044261	-0.00015571	-0.0063369
Aspni5_44359	-0.0033694	0.0031903	-0.0054711	-0.0090449	0.003369	-0.0030765	-0.0010872	-0.00067038	0.0061837	0.00010908
Aspni5_44332	-0.0049007	0.00053583	-0.019923	0.00099188	-0.014898	-0.019442	-0.018991	-0.03175	0.044775	-0.0052255
Aspni5_44295	0.013941	-0.0059423	-0.0043789	-0.0042704	-0.0034691	0.01458	-0.021876	-0.017181	-0.0058541	-0.010822
Aspni5_44277	-0.011143	0.014656	0.0083841	-0.021246	0.015218	-0.0052958	-0.0068162	-0.012416	0.0028443	-0.02498
Aspni5_44205	0.0013443	0.0095038	-0.005363	-0.0048406	0.0035624	0.0014864	0.0014616	-0.00017558	0.0058223	-0.0056069
Aspni5_44135	-0.0028612	0.0016939	0.0013822	0.0017692	0.013883	0.0027252	0.0058813	-0.0018791	-0.0018405	-0.012082
Aspni5_44117	0.0031859	0.012409	-0.0044609	-0.010895	0.0052874	-0.0064105	-0.0048165	0.004585	-0.0020079	-0.0058007
Aspni5_44100	0.00088615	0.0027565	-0.0055833	-0.0019072	0.0095889	0.0015229	0.0048048	0.0025526	0.0043526	0.0011339
Aspni5_44014	-0.006096	-0.0001652	-0.0096658	0.0051072	0.0072501	-0.0040754	0.010272	-0.001521	-0.0033884	0.0093645
Aspni5_44012	-0.0087791	-0.0054005	0.0051666	0.0048034	0.0021926	0.0003991	0.0024483	-0.0015361	0.0092856	-0.011457
Aspni5_43969	0.011672	-8.2885e-05	0.0095005	0.016176	0.015315	0.0091111	0.0081805	0.0045782	0.0048189	0.021542
Aspni5_43968	-0.00054392	0.0012032	0.00094563	-0.00088641	0.0020991	-0.0017195	0.0010406	-0.00091699	0.0018385	0.0045875
Aspni5_43966	-0.0055102	0.011217	0.0027872	0.018497	0.003258	-0.00067883	-0.022904	-0.013466	0.0085913	0.007919
Aspni5_43936	-0.0021366	0.0065125	-0.014484	-0.0021904	0.0048542	-0.0040531	-0.0059383	-0.0083026	-0.010641	0.0049217
Aspni5_43933	-0.019964	-0.000838	0.015643	0.0076202	0.015213	0.023472	-0.0002444	-0.0069686	0.00023191	0.010779
Aspni5_43851	-0.0063525	-0.0024845	0.0018968	-0.0093679	-0.0044296	-0.0015803	-0.011894	-0.0026826	0.0075755	0.0019158
Aspni5_43825	-0.0021263	0.0049513	0.0094868	-0.0026337	0.021705	0.032944	0.018939	0.017138	-0.0029766	0.018552
Aspni5_43792	0.0088545	0.0022764	-0.0053942	-0.0008179	0.005251	0.0072078	0.0080531	-0.015282	-0.010606	-0.009229
Aspni5_43783	-0.0008471	0.0074584	0.0095829	0.010644	0.0093457	0.0049752	0.01179	-0.0037174	0.0036413	0.001582
Aspni5_43753	0.0064077	-0.0051681	0.0055267	-0.0088995	4.8524e-05	-0.0024408	0.0025032	-0.0064445	0.00089214	-0.0034135
Aspni5_43625	-0.0043663	0.00047282	0.0035187	-0.00017703	0.0092296	0.0013669	-0.003737	0.00012474	0.013221	-0.0083809
Aspni5_43538	-0.018986	-0.0038928	0.025089	0.0068988	0.016247	-0.011629	0.016078	-0.0017083	0.033583	0.015346
Aspni5_43507	0.0011371	-0.0032581	-0.0028321	-0.0039494	0.010411	-0.0091293	-0.00074431	0.0045917	0.00078409	-0.0011945
Aspni5_43495	-0.0038645	0.011404	-0.00024343	-0.0085083	0.0061425	-3.3394e-05	-0.0060373	-0.00041967	0.0027855	-0.0043946
Aspni5_43408	-0.0053881	0.014725	-0.010808	-0.0093565	0.0021857	0.0052776	-0.02831	-0.011213	-0.01284	-0.019534
Aspni5_43386	-0.0037263	-0.020571	-0.017938	-0.016093	0.0040015	-0.0065783	0.027506	0.0031373	-0.0097561	0.026038
Aspni5_43335	0.0032234	4.4196e-05	0.0058011	-0.0092543	0.020993	-0.024411	-0.0063388	-0.023554	-0.026818	0.0071045
Aspni5_43317	-0.00091529	-0.0051903	-0.0023086	0.010087	0.0054821	0.0013265	0.0023037	0.004431	0.0038578	-0.0085904
Aspni5_43258	-0.0064994	0.0064986	0.0011288	0.0031065	0.0080794	0.0010458	-0.0011386	-0.00079549	-0.00086236	0.00071179
Aspni5_43257	-0.0011589	0.0059326	0.0038871	-0.0031699	0.0015216	-0.0011463	-0.00499	-0.001996	0.0018066	-0.0070193
Aspni5_43156	-0.0020902	0.0031204	-0.0062309	-0.0013444	-0.0053248	-0.0015707	0.0018976	-0.0013521	0.0083701	-0.0044394
Aspni5_43114	0.0033954	-0.00033523	-0.0051133	0.0083987	0.011723	0.0095981	0.0054522	-0.003478	-0.0057866	-0.0030243
Aspni5_43109	0.0029478	-0.0060915	-0.024981	-0.0018543	0.027665	-0.032528	0.010491	-0.0049003	-0.0025066	-5.5501e-05
Aspni5_43088	0.0014746	-0.0056826	0.012021	-0.0057173	0.001653	-0.00079053	-0.00050151	0.0023194	-0.0050433	0.00054731
Aspni5_43069	-0.0010152	0.0018873	-0.002443	-0.0075134	0.0064144	-0.0070385	-0.0032201	0.0022062	0.0033776	0.005162
Aspni5_43065	-0.0026656	0.0058025	-0.0074455	-0.0031421	0.00017342	-0.0045583	0.00057419	-0.00095463	0.002864	-0.00051002
Aspni5_43064	-0.00014361	0.0092042	-0.0057423	-0.00079082	-0.00087113	-0.00082773	0.001352	0.0016226	0.0022619	-0.003364
Aspni5_43031	0.00041321	0.0057391	-0.0043198	0.0048125	-0.0002864	-0.0027772	0.005239	-0.00019391	-0.00030235	-0.00050846
Aspni5_43007	-0.00072438	0.0038952	0.00214	-0.0016131	0.001462	0.0012679	0.0013274	0.00011789	0.001303	-0.0067947
Aspni5_42924	-0.00070288	-0.0032778	0.00013495	0.0019987	-0.0013805	0.0022512	0.00092726	-0.0018713	-0.0011355	-0.0058039
Aspni5_42895	0.0022147	-0.016275	-0.0035599	0.00047127	0.010459	0.017953	-0.02071	0.014698	-0.0031229	-0.025255
Aspni5_42884	0.0081544	-0.007957	0.02105	-0.016541	-0.0091779	-0.010151	-0.013166	-0.011937	0.010719	-0.0015286
Aspni5_42868	-0.0025929	0.0068964	0.0023468	-0.0057293	0.0028779	0.0011827	-2.0785e-05	-6.2401e-05	-0.00048556	-0.0019143
Aspni5_42843	-0.0025745	0.0091502	-0.0026816	0.0060152	-0.004427	-0.0013439	0.0034188	-0.0023243	0.0040685	-0.0052297
Aspni5_42818	-0.0051129	-0.019641	0.019118	-0.014176	0.03169	-0.017027	0.008619	-0.032916	0.0068906	-0.011107
Aspni5_42810	0.0012183	0.00098435	0.0062219	0.00036875	0.0084206	-0.0043463	-0.0006292	-0.00023508	0.00077443	0.0031991
Aspni5_42763	-0.013758	-0.0043326	-0.011496	-0.00093834	0.010141	0.0079115	-0.0053758	0.00020305	0.0015316	0.0048854
Aspni5_42743	0.0042368	0.0050767	-0.0060675	0.0046704	0.0058269	0.0054373	0.0068281	-0.004904	-0.0064263	-0.0037098
Aspni5_42719	-0.0034495	0.0018586	-0.0034151	0.0010052	7.1807e-06	-0.0018713	0.0014288	0.0030548	-3.3542e-05	-0.0021009
Aspni5_42717	-0.0012296	0.0016585	0.0021983	-0.0035697	0.0048392	-0.0064708	0.0019636	-0.0064108	0.0031167	0.0071496
Aspni5_42668	-0.014879	-0.010866	-0.010459	-0.0014516	0.0029904	0.011156	-0.00012188	0.00021849	-0.0011318	0.003409
Aspni5_42652	-0.0017626	0.021981	-0.0043162	0.00043694	0.00078968	-0.0075145	0.0028043	-0.02196	-0.0081017	-0.0096042
Aspni5_42531	0.0043962	0.0053644	-0.00045945	0.0054115	0.001601	0.0031062	0.0053621	8.4988e-06	-0.0044691	-0.003315
Aspni5_42527	0.0019054	0.0029113	0.012612	0.0030279	0.0039045	-0.0048766	0.0057882	0.0049043	0.0046948	-0.0011889
Aspni5_42525	0.0069543	0.011025	0.0031697	-0.0011887	0.020012	-0.0010202	0.0066083	0.0068698	-0.0094627	0.0017072
Aspni5_42523	0.0097661	0.0092681	-0.015833	0.0088692	-0.0017763	0.0034522	0.0069447	-0.0021499	-0.0065929	0.0036999
Aspni5_42513	-0.0011771	0.0073519	0.0040683	-0.01051	0.004009	-0.0076911	-0.0048758	-0.00060563	-0.0013941	0.0048422
Aspni5_42490	0.00088735	-0.0028483	-0.00076517	-0.01055	0.00091447	-0.0047155	-0.014259	0.00078092	0.0053277	0.0054419
Aspni5_42463	0.0036822	0.0014603	-0.0022937	-0.0042521	0.0055672	0.0035084	-0.0014744	-0.0034404	-0.0043812	0.00068779
Aspni5_42462	0.0028307	0.01591	-0.011196	-0.038859	0.010023	0.00068572	0.0017088	0.013753	0.015345	-0.01018
Aspni5_42452	0.0048833	0.0023828	0.0029302	-0.0044438	0.0017236	-0.0015514	-8.9944e-05	0.004515	-0.004072	-0.0055465
Aspni5_42414	-0.0027614	-0.0034614	-0.0096842	0.005235	0.0024503	-0.0028618	0.0058785	0.0024038	-0.003354	0.005091
Aspni5_42411	0.0049464	0.008028	-0.0099476	-0.010946	0.0052571	-0.0070021	-0.0011348	0.0043972	-0.00071479	-0.0041384
Aspni5_42365	-1.2268e-05	-0.0017444	0.012271	-0.0034939	-0.010734	-0.0053226	0.025437	0.020327	-0.015231	-0.00086106
Aspni5_42340	-0.003469	-0.0070524	-0.0025169	-0.0046484	0.0039672	0.0089414	-0.0020372	-0.0041738	-0.004537	0.004344
Aspni5_42320	-0.0086995	0.0061175	-0.0047905	0.0026542	0.023325	-0.0089304	-0.003194	0.037072	-0.0051248	-0.014308
Aspni5_42319	-0.00605	-0.0078809	-0.014918	-0.0058236	0.0020679	-0.01697	-0.0023791	-0.0063082	0.0013619	0.0021958
Aspni5_42318	-0.0021264	0.006451	-0.022244	-0.0058455	0.004771	0.0050587	-0.019571	-0.0076458	-0.0018951	-0.018952
Aspni5_42306	0.0058626	-0.004639	0.016624	-0.0038763	0.0066575	-0.011833	-0.02657	0.024051	-0.0036904	-0.0058108
Aspni5_42282	-0.0020918	0.0019856	-0.0068065	0.012083	0.0034481	-0.0029547	0.012848	0.00082775	-0.0034031	-0.0033151
Aspni5_42253	-0.023929	0.0055272	0.017071	0.026972	0.0061618	-0.015722	0.01033	-0.0062541	-0.012163	0.0006756
Aspni5_42251	0.0080234	-0.013002	0.013899	-0.0027685	0.001168	0.0011349	0.012941	0.0032767	-0.019271	0.012018
Aspni5_42250	-0.00063239	-0.0013537	0.006653	0.0027609	8.6607e-05	-0.0029426	-0.0024981	-0.0099987	0.001028	0.0018424
Aspni5_42244	-0.0062342	-0.0033379	0.00034019	-0.009636	-0.00050021	0.0022398	-0.0053454	-0.0080107	0.0057676	-0.0025945
Aspni5_42243	0.012338	0.017026	-0.019499	-0.0018944	0.0090384	-0.0045788	-0.0049434	-0.0082421	0.00093427	-0.0027705
Aspni5_42242	-0.0011185	0.012973	0.0027947	-0.0011603	-0.00017568	0.0080583	0.0054151	0.0068994	0.001066	1.1409e-06
Aspni5_42240	0.0053957	-0.0056693	-0.0033143	0.013394	0.013806	0.0012352	-0.00098193	0.0068489	0.017629	0.011652
Aspni5_42238	0.0090775	0.00072997	-0.014213	0.00068417	-0.011858	0.0080435	0.0044304	-0.0040184	0.0012968	0.001897
Aspni5_42235	-0.0020818	-0.0056886	-0.0049508	0.01079	0.0050238	-0.0053643	-0.0039136	-0.0018275	0.0019149	-0.0017075
Aspni5_42232	-0.0074394	0.0010734	-0.0027006	-0.0074836	0.0047544	0.0028736	0.011577	-0.0056525	0.0052843	-0.0012771
Aspni5_42231	0.0017453	-0.00068337	0.00074892	-0.0014421	0.0035252	0.0019373	-0.0013364	-0.00025096	0.0027214	0.0040882
Aspni5_42227	-0.002805	0.012781	-0.0044217	-0.0071781	-0.0045079	-0.001895	-0.0044556	-0.0033981	0.0037955	-0.0013795
Aspni5_42206	-0.0047229	0.0014012	0.0083464	-0.0059521	0.012595	-0.0062804	-0.0024452	-0.0085955	-0.01244	-0.0024137
Aspni5_42198	-0.0011394	0.0037597	-0.0086081	-0.0048339	0.0030549	-0.0048956	-0.0035589	0.001419	0.0018689	-0.0022893
Aspni5_42197	-0.0082896	0.022874	-0.0014947	-0.023295	0.0099548	-0.0070715	-0.013994	-0.0077342	0.0031151	-0.017096
Aspni5_42118	0.0010721	0.0037593	-0.0020919	-0.0036042	-0.0016173	-0.0050461	0.00038531	-0.0048025	0.003787	-0.0045551
Aspni5_42073	0.017343	0.0010152	0.025128	0.0099153	0.017039	0.0013339	0.0031466	-0.030834	0.0085412	-0.0064221
Aspni5_42068	-0.0051932	0.002599	-0.0024612	-0.00035691	0.0065057	-0.00050468	-0.001588	-0.018076	0.012203	0.010861
Aspni5_42051	-0.011256	-0.013957	-0.014281	0.0041567	-0.0037812	-0.011575	-0.00050021	-0.0078911	-0.0031389	0.002813
Aspni5_42045	-0.00081907	0.0017867	-0.00063749	-0.0008052	0.00057195	0.00082835	-0.00048868	-0.00017785	0.0020893	0.0025215
Aspni5_42044	-0.0081328	-0.0091788	0.00074052	-0.0042009	0.010634	-0.0028485	-0.0034334	-0.00043011	-0.0022749	0.0026923
Aspni5_42037	0.0018748	-0.0067417	0.0059038	-0.0055561	0.0048358	-0.0024567	-0.0069034	-0.0041432	-0.006689	0.0014266
Aspni5_42026	0.0073202	-0.0053018	-0.0068577	-0.013874	0.0044861	-0.0063476	0.00081748	-0.0010594	-0.010585	0.009833
Aspni5_41975	0.0049216	-0.0069523	0.0039271	-0.002206	0.0096203	-0.0031175	-0.0049778	-0.00042537	-0.00028271	0.00063034
Aspni5_41964	-0.0026597	-0.023021	-0.0046088	-0.010634	0.037478	0.029033	-0.02198	-0.009956	0.019565	0.0007738
Aspni5_41899	-0.0008882	0.0024187	0.0028031	0.00073634	0.0034817	-0.003918	0.0096175	0.0067967	-0.0037085	0.0047975
Aspni5_41792	0.0016358	0.0009844	-0.0058502	0.00062535	-0.00073943	-0.0023159	0.0004706	7.8086e-06	0.00059934	0.0018889
Aspni5_41769	-0.005555	0.0014954	0.002577	-0.0063892	0.0049049	-0.0030835	-0.0026216	0.000202	0.00036407	-0.001348
Aspni5_41724	-0.0074852	-0.006956	-0.0096073	-0.0073654	0.0024322	-0.0039961	0.0010251	0.010062	0.0029573	-0.0032727
Aspni5_41688	-0.0031233	0.0025754	-0.0033619	-0.0069502	0.0018174	0.00022235	-0.0068257	-0.0035287	-0.00022528	2.7948e-05
Aspni5_41618	0.0067333	-0.0062993	-0.014717	-0.0039969	0.0070992	0.0066088	-0.0071166	0.0007977	-0.0066132	-0.015123
Aspni5_41616	-0.0025359	0.0052186	0.0056097	-0.0045014	0.0022277	-0.0031772	-0.0037522	0.00086005	0.004768	-0.0024446
Aspni5_41606	0.014952	0.011526	-0.0034678	0.0065509	0.0032322	0.0054018	-0.0094099	0.0095325	0.0035901	-0.00024196
Aspni5_41547	-0.0048779	0.0055311	-0.001316	-0.011154	-0.010474	-0.0042816	-0.0042545	-0.0028569	-0.0033133	-0.0076816
Aspni5_41521	0.0027308	-0.0013695	0.0011655	0.0043536	0.0032386	-0.003071	0.0025386	0.00094425	-0.00038871	0.0014274
Aspni5_41497	-0.0011771	0.0029097	-0.0027674	0.0045501	-0.00053695	-0.0010651	0.002769	0.0015784	0.0036064	0.0017771
Aspni5_41449	0.0034301	-0.011863	0.0093716	0.0027396	0.00072272	-0.0032428	8.2676e-05	-0.0098012	0.0079548	0.00026537
Aspni5_41442	0.0022988	0.0046495	-0.0094355	-0.0038281	-0.0022264	-0.0047467	-0.0042251	-0.00080239	0.0018305	0.00059524
Aspni5_41375	-0.001374	-0.016061	0.0028545	-0.0074835	0.020139	-0.009354	-0.0064577	-0.0047744	0.022953	0.03665
Aspni5_41359	-0.0056326	0.011053	-0.0067332	-0.0016898	0.0096319	0.0022456	0.0030094	-0.0063571	0.003144	-0.006345
Aspni5_41272	0.00019374	0.0022012	-0.00468	-2.3964e-05	-7.2371e-05	-0.0047773	-0.0013643	-0.0012762	0.0012846	0.0009365
Aspni5_41270	0.0034466	-0.00027071	-0.012134	-0.010264	0.0065725	-0.00093253	-0.010121	-0.0075558	-0.0093695	-0.0056455
Aspni5_41269	-0.0083514	0.0020435	-0.0017409	0.015388	0.021173	-0.0093389	0.00068482	0.011665	0.0083273	-0.0078385
Aspni5_41268	-0.0021498	0.025194	0.0076855	-0.012403	0.0081035	-0.0053709	0.0074788	0.0085826	-0.00016556	0.021871
Aspni5_41251	-0.0076089	-0.0030495	-0.0013264	-1.2982e-05	-0.0041287	-0.00095986	-0.0039449	-0.0034266	0.00061371	0.0029774
Aspni5_41250	0.0025395	0.0012717	-0.0088806	0.00956	0.0084774	0.0006441	0.007352	-0.00023177	-0.002078	-0.0055118
Aspni5_41247	0.0007332	0.0059859	0.0020881	-0.0073606	0.00046944	-0.0043482	-0.0011151	-0.0010279	0.0061859	-0.0019698
Aspni5_41246	0.010567	0.0039277	-0.011969	0.0082419	0.0043345	-0.0058278	-0.0011354	0.0019646	-0.00042034	-0.0044925
Aspni5_41245	-0.0064951	-0.016256	0.010031	-0.015139	0.003803	0.012464	0.0087657	-0.012264	-0.0079738	-0.0020187
Aspni5_41242	0.0026985	0.010493	-0.020122	-0.015427	0.0049144	-0.0046479	-0.012924	-0.0019375	0.011924	0.024388
Aspni5_41240	-0.00082871	-0.00067496	-0.00015922	-0.0011652	-0.0018069	0.008325	-0.0010309	0.0021676	-0.001957	-0.0025671
Aspni5_41237	0.0023255	-0.0036356	0.011207	-0.011823	-0.004261	-0.0183	0.010631	-0.0024482	0.013749	0.0090965
Aspni5_41234	0.0030638	-0.0018778	0.0058781	0.0034972	-0.011508	0.012645	0.010041	0.024688	0.0013829	-0.002233
Aspni5_41231	-0.0011963	0.00033917	0.0037442	-0.0043284	0.0019654	0.0044655	0.0016497	-0.001034	-0.0015522	0.0050974
Aspni5_41227	0.0042624	0.0033581	-1.4386e-05	-0.002698	0.0027443	-0.0022513	-0.011181	-0.0014174	-0.020597	-0.00035785
Aspni5_41225	0.011247	-0.0088914	0.0051364	0.0016939	0.010307	0.00078623	0.0022259	-0.0053884	-0.0073825	0.0017276
Aspni5_41224	-0.0039213	-0.0047663	0.0051517	0.0014209	0.0027453	-0.0070371	-0.001306	-0.0012637	0.005979	0.0053715
Aspni5_41218	0.0024403	-0.0087391	-0.0017247	0.0010158	0.0098039	-0.0043202	-0.002577	0.0041195	0.0012748	0.0067636
Aspni5_41216	0.0027928	-0.0029578	0.0073737	0.00045474	0.004544	0.002384	0.0029754	-0.0014148	0.0048303	-0.00010713
Aspni5_41214	-0.0016264	0.00066902	-0.0013527	-0.0031611	0.002624	-0.0032599	0.0010502	0.0031743	0.0044238	-0.00060626
Aspni5_41210	-0.010765	0.014635	0.023142	-0.024743	0.021486	-0.010986	0.040723	0.013427	-0.0071807	0.012328
Aspni5_41209	-0.00497	0.013432	0.0017493	-0.0087889	0.0069474	-0.0057403	0.0045378	-0.00031672	8.116e-05	0.014578
Aspni5_41205	0.017688	0.0071065	-0.00089572	0.0056601	0.012827	-0.0034564	0.0036273	-0.006768	-0.0070218	-0.00085785
Aspni5_41080	-0.0040701	-0.0027035	0.00042792	-0.0044526	0.0082846	-0.0041233	0.0017323	-0.0019833	-0.0094127	-0.0040525
Aspni5_41078	-0.0085677	-0.013362	0.0067739	-0.0021238	0.039877	0.0080785	0.0020869	-0.0063436	-0.00096412	0.0099564
Aspni5_41050	-0.0073676	0.01331	-0.0097394	-0.010617	0.012592	0.0044649	-0.016348	-0.025623	-0.019232	0.00057876
Aspni5_40936	-0.0054039	0.0066433	-0.0020058	-0.00013402	0.00956	-0.0033717	-0.0022426	0.0047966	-0.00028784	0.0033549
Aspni5_40909	-0.0004801	-0.0087685	-0.0019259	-0.0038668	0.0055906	-0.0017114	-0.0043171	-0.00024569	-0.006483	-0.013396
Aspni5_40895	0.0063865	-0.0041854	-0.0021246	0.02776	0.017927	0.035685	0.023846	-0.020369	-0.010325	-0.0047292
Aspni5_40891	-0.0079101	-0.032935	-0.0050145	-0.011258	0.015016	-0.010609	0.0022964	0.024424	0.0032343	-0.025879
Aspni5_40890	-0.0054016	-0.0057076	0.0061238	0.0051	0.026811	0.0039666	0.0085554	-0.0084528	-0.0052798	0.010612
Aspni5_40889	0.0024833	-0.020989	-0.023279	-0.021074	0.00074365	-0.014029	0.016269	0.0043462	-0.00098977	0.0071703
Aspni5_40885	-0.011612	0.0093485	-0.0065987	0.0047399	-0.00030828	0.0011369	0.0053839	-0.0019183	0.00019044	-0.0020454
Aspni5_40883	-0.0051353	-0.007491	-0.0079712	-0.00016668	0.0012297	-0.0094857	-0.014258	-0.0021016	-0.035238	-0.02241
Aspni5_40868	-0.0014296	0.0054558	-0.0091798	-2.316e-06	-0.0080182	-0.0083389	0.0071939	-0.0043011	0.0037944	0.014574
Aspni5_40820	0.0026332	-0.0044031	-0.002438	-0.010297	-0.0020625	-0.0043508	-0.0024218	-0.001045	0.0037328	-0.00051865
Aspni5_40812	0.00021195	0.006854	-0.0048531	-0.023707	-0.00050285	0.005192	0.018804	-0.024734	-0.0040916	0.025053
Aspni5_40768	0.0018449	0.0029162	-0.0028109	-0.0076961	0.004935	-0.013968	0.003817	-0.0012634	0.0077448	-0.0024512
Aspni5_40697	-0.011884	0.0024315	-0.005659	0.0055108	0.00095609	0.00094706	-0.0059131	0.0019599	-0.0071965	0.0041012
Aspni5_40665	0.004241	-0.0043628	0.015242	-0.0076461	0.0029483	0.022754	0.0095607	-0.022773	0.0036238	0.01282
Aspni5_40652	0.015613	0.0037913	3.8846e-06	0.002588	0.0091647	-0.0067313	-0.0045467	-0.0043045	-0.0056556	-0.0063994
Aspni5_40586	-0.0012077	0.0080692	-0.016592	-0.010759	0.019807	0.0085898	0.037091	-0.023791	-0.008724	0.018857
Aspni5_40532	-0.0034563	-0.0011445	0.010818	0.010621	0.0016656	0.0057352	-0.011843	-0.012935	0.0011868	-0.0053017
Aspni5_40518	-0.0013433	0.0054768	0.0017674	-0.00011258	0.0047283	0.0022623	-0.00041433	0.004856	-0.0051303	-0.0027623
Aspni5_40432	0.026645	0.0077511	0.021442	0.029256	0.020227	-0.014064	0.027871	-0.014942	0.02593	-0.021575
Aspni5_40388	0.00079271	-0.0059832	0.010635	-0.0025829	0.0051958	0.002089	-0.0011587	-0.0027326	-0.00028484	0.013224
Aspni5_40385	-0.0068094	-0.0082259	-0.010337	-0.0031125	0.019763	0.0094937	0.00042582	-0.017456	0.016535	0.038595
Aspni5_40384	-0.0037906	-0.0045219	-0.00080012	-0.020462	0.02872	0.029797	0.034898	-0.021559	-0.023278	0.032087
Aspni5_40336	-0.0017496	0.010361	-0.004107	0.0022427	0.0029832	-0.0067747	0.00064058	-0.00097109	0.0015016	-0.0057249
Aspni5_40301	0.0010103	-0.019411	-0.0016651	-0.0091434	0.013968	-0.0045506	-0.00077566	0.0042388	-0.0031166	0.0030617
Aspni5_40281	-0.020399	-0.019124	-0.0019578	0.0079272	-0.011551	0.0081982	-0.021888	-0.024112	0.0083907	-7.6452e-05
Aspni5_40280	0.0054573	0.0094341	0.00014912	0.011413	0.014223	0.010814	0.00049081	-0.011205	0.0030387	0.018832
Aspni5_40256	3.7682e-05	-0.0057954	0.016919	0.0019207	0.0047889	-0.0014267	0.0086403	-0.0014469	0.00054152	-0.00094561
Aspni5_40240	0.019721	-0.0073463	0.012369	-0.0067744	0.00012128	0.021451	0.0098913	-0.010213	-0.0097	-0.01475
Aspni5_40229	-0.0049153	0.007065	-0.0068472	0.0031103	-0.002995	-0.014608	-0.0043683	-0.0017869	-0.0013083	0.012868
Aspni5_40201	0.0044673	-0.0019067	0.0035286	-0.0046889	0.0048536	0.015891	-0.0024361	0.022213	0.015446	0.0038803
Aspni5_40198	0.0037379	-0.012275	-0.0084135	0.020755	0.0047793	0.013401	-0.012438	0.03749	-0.0087869	0.025538
Aspni5_40197	0.020716	0.010579	-0.0097146	-0.0077307	-0.0032221	0.017191	-0.014142	0.049277	0.011814	0.0094355
Aspni5_40161	-0.002168	0.0043481	-0.015917	0.011623	0.00025616	-0.0032077	0.0081947	-0.0028195	-0.0066888	-0.002914
Aspni5_40157	-0.0027988	-0.0015971	-0.0063213	-0.0059293	0.0013587	-0.0055465	-0.012554	-0.00033083	-0.00089531	-0.0069509
Aspni5_40151	-0.0027295	-0.0051603	0.0054928	-0.0052085	0.0056179	0.0042989	0.0034034	-0.00081141	-0.0010939	-0.0059649
Aspni5_40148	-0.0090444	-0.006222	-0.016205	0.0034631	0.001291	0.0043765	0.022408	0.025748	-0.0068689	0.025191
Aspni5_40114	-0.031627	-0.027671	-0.0059434	-0.00073351	-0.011384	0.020117	0.036859	0.026877	-0.0047301	0.024297
Aspni5_40113	-0.0052446	0.0023156	0.0066787	-0.0045639	0.0018675	0.0059479	0.0094707	-0.011793	-0.025528	-0.008137
Aspni5_40112	-0.00012325	-0.0060305	-0.012967	0.016083	0.01173	-0.0087389	0.0090661	-0.00027566	-0.00709	-0.0037558
Aspni5_40111	0.0024837	0.0061557	0.0074976	0.0053613	0.023109	-0.0040858	0.014233	0.0040789	-0.0088504	-0.011508
Aspni5_40075	0.0029015	-0.0049468	0.0092621	-0.0016788	0.001575	-0.0039095	-5.4866e-07	0.0039097	0.0076842	-0.0012771
Aspni5_40053	-0.0039356	-0.0010104	0.00052435	-0.0052276	0.0019033	-0.0029169	-0.0044867	0.0057858	-0.0016714	-0.00046607
Aspni5_40040	0.0069616	0.0035269	0.0048423	-0.0020079	0.0038923	-0.00064728	-0.0020748	-0.00035755	-0.0017761	0.0032016
Aspni5_40039	-0.0035513	0.006551	-0.012932	0.001479	-0.0019962	-0.0016065	0.0029631	0.0018191	-0.0037727	0.0024148
Aspni5_39908	-0.012186	-0.013247	0.0090297	0.0075826	0.017676	-0.01402	0.0097407	0.014277	-0.0010022	0.0026543
Aspni5_39888	-0.0011434	-0.0015967	0.0066005	-0.00098757	-0.0010393	0.00011193	-9.9248e-06	-0.00087473	0.0094035	-0.0013096
Aspni5_39831	-0.0049199	-0.018089	-0.00065744	0.0035659	0.019641	0.0040644	0.0014436	0.0024584	0.012761	-0.0068666
Aspni5_39725	-0.0053766	0.01705	-0.014798	0.0076968	-0.003395	-0.018787	-0.010395	-0.0022591	-0.013788	-0.012856
Aspni5_39638	0.0038477	0.0098755	-0.00019102	0.0020848	-0.0055616	0.00015198	0.0028998	0.0018612	0.00024988	0.0030928
Aspni5_39517	0.001382	-0.030073	-0.001477	0.0028566	0.011582	-0.003741	-0.0042632	0.0031152	0.0021506	0.0037357
Aspni5_39408	0.0039356	0.00035144	0.00078939	-0.0034478	0.0073619	-0.011146	0.0002854	-0.0023263	0.0033178	-0.001184
Aspni5_39407	-0.0021261	-0.0032506	0.0041478	-0.0051917	0.011149	-0.011276	-0.014053	-0.0041885	-0.0010197	0.0029845
Aspni5_39387	-0.0036246	0.0052938	-0.003675	0.002558	0.0017184	0.0011142	-0.0022581	0.0038741	-0.0030816	-0.0033802
Aspni5_39385	0.0023314	0.0088159	0.0027176	-0.0051845	-0.002055	-0.004347	-0.00029475	0.0017592	0.0031133	0.00067261
Aspni5_39382	-0.0055137	0.0030691	-0.0019813	-0.0039199	0.00062271	-0.0035199	0.0027897	-0.0021079	0.00027589	-0.0020899
Aspni5_39381	0.0094384	-0.0090394	0.0030445	-0.0096572	0.0089297	0.0022947	-0.0062272	-0.0066781	0.00081816	-0.0011372
Aspni5_39348	0.0071002	-0.0037911	-0.0064279	0.0086065	-0.0088597	-0.018715	-0.0069054	-0.0082262	-0.010123	-0.0015814
Aspni5_39347	-0.00017966	-0.0060674	0.0026626	0.0047323	0.0010913	-0.0049649	0.0027489	-0.0034879	-0.0055104	0.0032453
Aspni5_39346	-0.0056811	0.0061897	-0.0043213	0.0027498	0.00031552	-0.0017827	-0.00083286	0.0043641	0.0023592	0.0035859
Aspni5_39335	0.0053568	0.0035179	0.0032941	-0.0078356	0.011915	0.01074	-0.00037498	-0.0067531	-0.0073407	-0.019327
Aspni5_39334	0.0040648	0.0069528	0.0078542	0.0062977	0.025561	0.0081865	-0.010936	-0.0081012	0.024434	0.018839
Aspni5_39333	-0.0040215	0.0051021	0.0024191	-0.0059887	0.0058312	-0.0015163	0.0083646	-0.002491	0.0073448	-0.0055702
Aspni5_39321	0.024029	0.00045733	-0.0001285	0.00089171	-0.0047472	-0.0054396	0.0063819	-0.0015644	0.0022451	0.0050533
Aspni5_39320	0.00052168	-0.001045	0.010029	-0.0043837	-0.0014515	-0.0033484	-0.02141	-0.0058647	0.026107	-0.01578
Aspni5_39319	-0.004973	0.0076129	-0.024002	-0.0041367	0.013246	-0.0080684	-0.0045641	-0.0074193	-0.015264	-0.0068801
Aspni5_39317	-0.0026196	0.0013947	-0.0033496	-0.0061012	0.00070931	0.0037528	0.00066518	0.0032693	0.0029938	0.0001335
Aspni5_39253	-0.0052385	0.0042559	0.0014719	0.0098323	0.012959	0.01212	0.00087328	0.008314	-0.0071904	-0.010471
Aspni5_39238	-0.0058959	0.0010254	-0.0066332	0.013155	0.0057551	0.0004542	0.0046214	-0.0052683	-0.0067867	-0.0072608
Aspni5_39194	-0.0029853	0.0048505	-0.0039208	0.0029589	0.00066392	0.00093865	-0.0010346	0.00037849	-0.0034887	-0.0011023
Aspni5_39193	-0.011661	-0.0049887	-0.0067412	0.015191	0.010496	-0.00040754	0.005925	-0.0014238	-0.0086476	-0.0055085
Aspni5_39182	-0.00078341	0.0041154	-0.0075209	0.0067114	0.0052491	0.00033429	0.0038177	-0.0010277	0.005316	-0.0037322
Aspni5_39151	0.0064876	-0.0095678	-0.020557	-0.034467	0.032454	0.052527	-0.015383	0.050507	-0.0040963	-0.036602
Aspni5_39143	0.029905	-0.01791	0.0080654	-0.025317	0.0027918	0.010704	0.0045967	-0.035341	0.00083749	-0.011642
Aspni5_39134	-0.0098913	0.0036868	-0.0078007	-0.013479	-0.0053219	0.012166	0.0094428	0.0003654	-0.0032947	0.029116
Aspni5_39105	-0.0032207	-0.0015971	-0.003796	-0.0041741	-0.0012888	-0.0045682	0.0036318	-0.00044401	0.0019488	0.0028791
Aspni5_39104	-0.0010273	0.0010457	-0.0011946	-0.003132	0.0039798	-0.0005001	0.00060885	0.0022401	0.0030981	0.00011972
Aspni5_39103	0.010544	0.0071633	-0.0075972	0.0011208	0.010764	0.0041442	0.0074639	-0.00724	-0.0031301	0.0041062
Aspni5_39016	-0.018488	0.0091758	0.0074202	-0.0078068	0.00077009	-0.0019571	-0.022079	0.026206	-0.0070056	0.030297
Aspni5_39005	-0.0055121	0.0041496	0.0052806	-0.011662	-0.0097479	0.010844	-0.0062217	-0.0075179	-0.017048	-0.02813
Aspni5_39004	-0.0077305	-0.0072694	0.014981	0.0007925	0.0017664	0.011255	0.0090652	0.0022949	0.0022196	0.00050005
Aspni5_39002	0.0011618	-0.00060911	0.0048268	-0.011441	0.0013932	0.0027739	0.0066242	-0.0054261	0.0024412	-0.0029908
Aspni5_38997	-0.012012	-0.017948	-0.01206	0.0031117	0.00079575	0.030661	-0.0059757	-0.011638	-0.029	0.00012984
Aspni5_38996	-0.017723	0.00051699	-0.012435	0.0076289	-0.012796	0.02469	-0.022629	0.012222	0.012827	-0.058133
Aspni5_38988	-0.010681	-0.0071643	0.0088802	0.0046792	-0.0037077	0.024496	-0.011701	0.0036727	-0.016669	0.011454
Aspni5_38987	0.0045079	-0.001497	-0.0088742	0.0066525	0.0091749	0.00041658	0.017033	0.016841	-0.0059997	0.017874
Aspni5_38974	0.001916	0.0060941	0.0039366	-0.00043931	0.0065902	-0.0036291	0.001067	0.0010014	0.0031111	0.0015393
Aspni5_38962	-0.0087211	0.00026556	-0.0080345	0.0052597	0.0014546	-0.0051229	-0.0030623	0.0047741	-0.0024755	0.0030554
Aspni5_38881	-0.012225	-0.013304	-0.01048	-0.0036325	0.0177	0.023539	0.048938	-0.0079779	-0.011312	0.0085283
Aspni5_38842	0.0052202	-0.011834	0.002938	-0.0043538	0.0018508	-0.0054264	-0.0020045	-0.018972	-0.0079833	0.0019907
Aspni5_38796	-0.0036793	0.00038983	-0.0035474	-0.00297	-0.0050129	-0.0030722	0.00198	0.0017217	-0.0043895	-9.6548e-05
Aspni5_38689	-0.0016194	0.012264	-0.014095	0.0011907	0.025287	0.0018559	-0.0045924	0.015205	-0.037086	-0.016252
Aspni5_38687	-0.021267	-0.0065522	0.013355	0.016316	0.008451	-0.019551	-0.0060055	-0.010394	0.015836	-0.0038418
Aspni5_38686	-0.0073763	-0.00035229	0.0039923	0.01317	0.0030939	0.0074664	0.0037975	-0.017141	0.0012552	0.01235
Aspni5_38683	-0.0011434	0.0091624	-0.0053134	-0.0028795	-0.00039896	-0.0015529	0.00023098	-0.0059423	0.0060569	0.0043081
Aspni5_38681	0.002821	0.0034118	-0.0043906	-0.0052962	-0.0013472	0.00091514	-0.00041667	0.0018935	-0.00061435	-0.00018703
Aspni5_38680	0.007353	0.0075594	-0.0046282	-0.0093446	0.022994	0.00010335	0.016307	0.013436	-0.002423	-0.0080141
Aspni5_38598	0.0043509	0.012579	0.0030404	0.0039915	0.01977	0.014689	-0.0089406	0.0021213	0.032054	0.018076
Aspni5_38538	-0.0043413	-0.00031867	-0.0028887	0.0030272	-0.0010519	-0.0033474	-0.0023602	0.0010318	-0.00077911	0.0018098
Aspni5_38486	-0.0032564	-0.019618	-0.0076258	-0.015642	0.048777	-0.011061	-0.018939	0.0060695	0.016831	0.030733
Aspni5_38420	0.0015437	0.0030996	0.0076031	-0.013759	0.0084014	-0.0058622	-0.0032223	-0.0037489	0.00505	-0.0081678
Aspni5_38411	0.0085365	0.0037522	-0.0068028	0.005143	0.003773	0.00096388	0.0022115	0.0035912	-0.0045884	0.0014972
Aspni5_38391	-0.017676	-0.013516	0.0048974	-0.0055035	-0.0021316	-0.0036052	0.013995	0.0043024	0.011457	0.00049801
Aspni5_38379	0.012718	-0.0036562	-0.0084066	-0.014771	0.019244	-0.0201	0.0076971	0.014736	0.016671	0.010856
Aspni5_38301	-0.0050109	-0.0041898	0.00056435	0.0069312	0.031618	-0.022758	-0.018828	0.025004	0.0021122	0.0017697
Aspni5_38201	0.006949	-0.016312	0.002111	-0.0063635	0.020961	-0.0013274	0.0013439	0.0048189	-0.0086052	0.0061765
Aspni5_38197	-0.0036384	-0.0032798	0.0072378	-0.0088798	0.01592	-0.0044211	-0.021906	0.00153	-0.049539	-0.01752
Aspni5_38196	-0.0032711	0.0022758	0.011507	0.029781	-0.0010307	0.0097381	-0.016366	0.0072136	0.018063	0.0013039
Aspni5_38064	-0.013643	-0.0092252	-0.0066566	-0.0031618	-4.0771e-05	0.0086722	0.012732	-0.012043	-0.028896	0.0072477
Aspni5_38060	0.0084482	0.0072804	-0.028279	0.019064	0.001399	0.0071324	-0.00080889	0.0028772	-0.015352	-0.0022917
Aspni5_38056	-0.0041432	0.0001664	0.031409	-0.0079822	0.01273	0.00056227	0.017102	-0.010295	0.0015689	0.0071775
Aspni5_38025	0.0001817	0.0036255	-0.0083066	-0.0056145	-0.0035112	-0.0040682	-0.0017412	0.0031033	0.0027262	-0.00057673
Aspni5_37969	0.00015654	-0.0045523	0.012207	-0.0031118	0.0032431	0.0075353	-0.012071	-0.02249	0.008968	-0.006441
Aspni5_37946	-0.0099138	-0.0065593	0.014914	-0.0020039	0.012183	0.007586	0.004005	-0.016775	0.018768	-0.024162
Aspni5_37926	-0.0034704	0.0047046	-0.0029467	0.00212	0.0056765	-0.0041867	0.0024214	0.0030417	-0.0037784	-0.0029772
Aspni5_37922	-0.0036992	0.0015114	0.0056874	-0.013434	0.0078946	-0.0097402	-0.0062889	0.004704	0.0035726	0.00042131
Aspni5_37920	-0.0079084	0.01783	-0.0048877	0.010946	0.0045415	0.00053617	-0.0031172	-0.0080779	0.0082085	0.03094
Aspni5_37877	0.013129	-0.021102	0.0024852	-0.0014135	0.012269	-0.0056025	-0.0092552	-2.8066e-05	-0.0098627	0.0030132
Aspni5_37807	0.00052003	-0.0043946	-0.00037494	0.0040431	0.0062388	0.0078465	-0.028825	0.002698	0.014128	-0.0024617
Aspni5_37801	0.0010516	0.005475	-0.00090897	0.0045473	0.0015882	-0.0039205	-0.010737	0.0018918	-0.013561	-0.0019392
Aspni5_37799	-0.0010433	-0.0019582	-0.032544	0.0033384	0.025966	0.027915	0.012723	-0.016974	-0.029996	-0.018321
Aspni5_37784	0.0087078	-0.0013081	-0.0037925	-0.0036382	0.021317	0.018925	0.0019949	-0.010789	-0.0027803	0.0054307
Aspni5_37737	0.00070039	0.01617	-0.0062052	0.0048401	0.023991	0.0053857	0.014995	0.022427	-0.0083874	-0.014117
Aspni5_37713	-0.0034271	0.007959	0.0045523	-0.00029146	-0.00057497	-0.0042132	0.00033953	0.0017788	-0.017376	0.0034842
Aspni5_37664	0.014202	0.010501	-0.00028878	-0.0041127	-0.0059873	-0.0036199	0.0054443	-0.0022252	-0.018602	0.0036236
Aspni5_37610	0.013201	0.0030621	-0.0018945	0.011256	0.0016378	-0.017233	0.00093054	-1.8442e-05	0.0021434	-0.0010033
Aspni5_37590	-0.0048189	-0.0084676	0.0098385	-0.0065209	0.0045382	0.0062225	-6.1286e-05	-0.001537	-0.0056657	-0.0016132
Aspni5_37548	-0.0038607	-0.026394	-0.0060156	-0.024172	-0.00050245	0.035867	0.014454	0.0025979	0.018968	0.012748
Aspni5_37547	0.0014404	0.0083686	-0.0049171	0.0056078	-0.005768	-0.0044637	0.005001	0.0008269	0.0062176	-0.002
Aspni5_37535	0.0047805	-0.015366	0.0096315	-0.014047	0.0032016	-0.0040052	-0.0071196	0.010043	-0.0097065	0.021239
Aspni5_37534	-0.0011988	-0.0017385	-0.0026129	0.0023748	0.0042781	-0.00093309	0.0035468	0.0063676	0.00030615	-0.0078628
Aspni5_37529	-0.0047419	-0.0048067	-0.012391	-0.0031916	-0.0071994	0.0086584	-0.0011513	-0.0043744	0.00055096	0.0030719
Aspni5_37507	0.0093324	0.0020018	-0.022921	-0.003005	-0.025739	0.0023386	0.005625	-0.0006982	0.013374	0.029674
Aspni5_37494	0.0014106	-0.0014828	0.0046572	-0.0064102	0.014214	-0.023409	-0.024645	0.0060749	-0.027483	0.019694
Aspni5_37488	-0.0044913	-0.0019532	-0.0043781	-0.029451	0.017323	0.0024557	0.043833	-0.0049255	-0.031555	-0.023358
Aspni5_37425	0.0025969	0.0016298	-0.0050393	-0.0030104	-0.0025775	-0.0050707	0.0015756	-0.0004949	-0.00043224	0.0002506
Aspni5_37420	0.0041953	0.0066203	-0.0028509	-0.0030525	-0.0024657	-0.00043167	0.0011511	-0.00019684	0.0027535	-0.0024132
Aspni5_37356	0.0033129	0.0071878	-0.0027039	-0.0032096	-0.0016062	0.0027239	-0.0028037	0.0054444	0.0050946	-0.0028693
Aspni5_37349	-0.00077487	0.0050764	0.0062299	0.0016526	0.010991	-0.0042582	-0.0026671	0.0047721	0.0079443	0.0034471
Aspni5_37346	-0.0022993	0.010366	-0.0037698	-0.01406	-0.00015539	0.0046017	-0.0018585	0.015071	0.008666	0.020534
Aspni5_37302	-0.0054509	0.0036813	-0.0013161	-0.0068415	0.0010899	-3.6811e-05	-0.0015785	0.0010044	-0.0015863	0.00057104
Aspni5_37300	-0.014909	-0.00039073	0.0014901	-0.0064233	-0.0050734	-0.0024224	-0.0070455	-0.0036915	0.0015686	0.0026435
Aspni5_37299	-0.0050966	-3.3528e-05	0.0028991	-0.0082776	-0.0021779	-0.0045976	-0.000846	-0.0078702	0.0073064	-0.00066246
Aspni5_37289	-0.0081721	-0.012722	-0.0010338	-0.015866	0.0030797	0.017069	0.013699	-0.0094987	0.016808	0.0061483
Aspni5_37250	-0.003646	0.010765	-0.00020251	0.0062506	-0.00090102	-0.0089735	-0.0035836	0.0092479	-0.0044294	0.0018604
Aspni5_37234	0.0075462	-0.0045547	0.0079125	-0.0033363	0.0084163	0.0061944	-0.0028017	-0.002283	0.0091471	-0.0037735
Aspni5_37229	0.013141	-0.0028812	-0.0042772	-0.0028046	0.013536	-0.019644	0.014053	-0.0088362	-0.003544	0.040929
Aspni5_37221	-0.0059992	0.0014041	0.0010461	-0.0082764	-0.0041173	-0.0026768	-0.0077682	-0.0051033	0.0048917	-0.0026324
Aspni5_37205	-0.0080531	0.00082725	-0.010946	-0.007275	0.0023088	-0.0038091	-0.0054854	0.0074597	0.0018467	-0.0028653
Aspni5_37201	0.0005851	0.00012329	-0.002785	-0.0015763	-0.0051826	-0.0014823	0.00029325	0.0010112	0.0053667	-0.00045581
Aspni5_37191	-0.0032256	-0.00095161	-0.0067774	0.00042725	-0.00091802	-0.0034427	-0.0028995	0.0057149	-0.0092402	0.0091234
Aspni5_37185	-0.0057336	-0.00062201	0.00022302	-0.015998	0.0092204	-0.0052745	-0.0039744	0.0012258	-0.0010509	0.0039619
Aspni5_37171	0.022127	0.0040208	-0.011894	-5.1257e-05	0.0060584	-0.0059926	0.0042401	0.0069492	0.0028046	0.0020513
Aspni5_37167	-0.0043418	-0.008792	-0.00025695	-0.0051522	0.0030524	-0.0059871	-0.002945	0.0049267	0.009699	0.0069315
Aspni5_37151	-0.011796	-0.00092808	-0.0052661	0.028536	-0.0064933	-0.0029327	-0.017849	-0.0085455	-0.0096557	0.012297
Aspni5_37149	0.015044	-0.0082938	0.0074461	0.0058081	-0.0022314	-3.4938e-05	0.0033046	-0.0081625	-0.0089382	3.9362e-05
Aspni5_37122	0.0034971	0.0048674	-0.0087118	0.0029745	-0.0039858	-0.0043081	0.0031373	0.00064154	0.0024928	0.0015608
Aspni5_37117	0.0023515	0.0041627	-0.0090699	-0.010813	-0.0070236	-0.0011188	-0.004625	-0.0053648	-0.0046785	-0.0075623
Aspni5_37104	0.0081077	0.00095919	-0.0018445	-0.003601	0.013533	0.0014274	-0.0065122	-0.0052204	5.8463e-05	0.029562
Aspni5_37071	0.006286	-0.014572	0.0079307	-0.0059035	0.0067886	0.0019938	-0.0021708	0.0007455	-0.0030867	0.0019474
Aspni5_37058	0.0046839	-0.010735	-0.0023046	-0.035712	-0.0029478	0.0094843	0.013616	-0.0028989	0.0070207	-0.0086337
Aspni5_37026	-0.0018292	-0.0028777	0.01387	-0.017687	0.021429	0.0051968	-0.011683	0.020901	-0.0071042	-0.016943
Aspni5_37016	0.0026043	-0.0066845	-0.0017558	-0.0084411	0.026885	-0.0036171	0.042061	-0.0076195	-0.016477	0.030656
Aspni5_37000	0.016536	0.0013052	0.00098753	0.0057138	0.010704	0.0025944	-0.00079388	0.0036561	-0.0077005	-0.0041138
Aspni5_36979	-0.0049016	-0.0067446	-0.0091296	-0.040676	0.038056	0.022933	-0.014654	0.035226	0.023848	-0.0029969
Aspni5_36953	-0.010306	0.0055646	-0.024342	0.0093608	0.019116	0.00786	-0.013474	-0.023352	0.0044814	0.010447
Aspni5_36932	0.0049701	-0.0025303	-0.0014492	-0.015407	0.023146	-0.034039	0.0074129	-0.029565	0.0084921	-0.011002
Aspni5_36846	0.0083178	-0.023994	-0.00442	0.0040998	0.01225	0.0012981	-0.0065168	-0.0083574	-0.010061	-0.0037665
Aspni5_36802	0.010389	0.0039235	0.0044054	0.0029054	0.0047203	0.0038272	-0.0054966	-0.00068434	0.00097877	0.0015605
Aspni5_36797	-0.011313	0.002067	-0.017393	-0.025616	0.027113	-0.017411	-0.0051713	0.011033	-0.012636	0.017158
Aspni5_36796	0.0048934	-0.02037	0.00045867	-0.0069229	0.039607	-0.014506	-0.030461	-0.0029143	0.0070023	-0.022032
Aspni5_36768	-0.011912	0.010364	2.7062e-05	-0.023723	0.019639	0.019066	0.032087	-0.017439	-0.011378	0.0010269
Aspni5_36751	-0.012814	0.033218	0.007568	0.020586	0.0088213	-0.0052982	0.013642	-0.039319	-0.019613	-0.036951
Aspni5_36723	0.0029296	-0.0018636	-0.0018482	-0.0047177	0.0013671	-0.00029292	-0.0054918	-0.0041722	-0.0046116	0.0071375
Aspni5_36692	-0.0036572	0.00083427	-0.0044163	-0.00044559	0.020514	-0.027132	0.025772	0.02248	0.022685	0.0011212
Aspni5_36675	-0.0038226	0.010393	-0.0033774	-0.0023939	-0.0021895	-0.003207	0.0029879	0.00022318	0.0030334	0.0011663
Aspni5_36588	-0.016116	-0.012986	-0.013586	0.013445	-0.0035472	0.0037335	-0.0089153	-0.0076626	0.00065303	-0.0022318
Aspni5_36584	-0.0044061	0.0021962	-0.0053619	0.0052906	0.0013155	0.0081556	-0.0066477	0.0034663	0.00041804	-0.0040501
Aspni5_36576	-0.0020207	0.014754	-0.0083862	0.0080195	0.003734	-0.015374	0.014022	-0.0033638	0.0080486	-0.0091202
Aspni5_36575	-0.0036875	0.0088235	0.0066762	0.0006181	0.0034348	-0.0014758	0.0041104	-0.0092074	0.01169	-0.0072659
Aspni5_36574	-0.00082406	-0.0026487	-0.0014229	-0.001258	0.0033027	-0.00048979	-0.001733	0.00157	-0.00071668	-0.0011619
Aspni5_36573	0.0062591	0.00053115	-0.016413	-0.0097519	0.0022869	-0.020076	0.0064429	0.0078093	0.0078183	0.0097977
Aspni5_36572	-0.016919	0.0053755	-0.0013888	0.0044154	0.015801	0.013624	-0.0020638	0.0011277	-0.010322	-0.010608
Aspni5_36571	-0.0015896	0.0026227	-4.3945e-05	-0.0034869	-0.00018621	-0.00085623	0.0016174	-0.0010417	0.0032734	-5.7679e-06
Aspni5_36569	-0.0001165	0.0061719	-0.0043834	-0.0056255	0.0013797	-0.0015461	-0.0016666	0.00041693	0.00021283	-0.0026953
Aspni5_36567	-0.0026242	0.0068756	-0.0028978	-0.0033234	0.0011992	-0.003064	-0.0016201	-0.0016393	0.0022967	-0.0048297
Aspni5_36544	-0.0028033	-0.00054947	-0.0021147	-0.0015345	0.009838	-0.012042	-0.0067083	-0.0014763	0.00087178	-0.0028011
Aspni5_36536	0.0042494	0.013607	-0.011409	-0.00034141	0.013338	0.0085467	0.0035681	-0.023928	-0.0056056	0.0038736
Aspni5_36528	0.036194	0.0092863	-0.015015	0.014451	0.020358	0.0021266	-0.026752	0.017068	0.02532	-0.014393
Aspni5_36524	-0.00081512	-0.0033593	-0.0010129	-0.0042916	0.017836	0.012275	-0.0012336	0.0028355	-0.0019456	0.0019223
Aspni5_36517	-0.0027247	0.0034283	-0.0035704	-0.0010525	-0.00093965	-0.0040912	0.000226	0.00075138	0.0018202	0.0028845
Aspni5_36462	-0.0040854	0.0066084	-0.0089526	-0.0050522	-0.0027015	-0.0072794	0.00071621	-0.001546	0.001522	2.039e-05
Aspni5_36457	0.00062793	-0.0065936	0.0035064	-0.0013816	0.0060747	-0.0037237	-0.0029766	0.0049976	-0.00092994	-0.0052041
Aspni5_36452	-0.002939	0.004924	0.004355	-0.0079272	-0.0048272	-0.0022394	-0.0050112	-0.0012338	0.0044484	-0.00273
Aspni5_36448	0.0056563	-0.0019179	-0.0056294	0.0013491	0.0010912	0.0023335	0.0055895	-0.0023848	0.00016948	0.0051745
Aspni5_36446	-0.0023493	0.0022598	0.0013298	-0.0017925	-0.00067088	-0.00092978	-0.0020296	-0.00022215	-0.00028065	-0.002553
Aspni5_36440	0.00097009	0.0052542	0.0025343	-0.0039016	0.00089751	0.001163	0.0034373	0.0021089	0.00059038	0.0050044
[truncated: 13,802 more rows]

## Sheet: PCA2 negative gProfiler
source	term_name	term_id	adjusted_p_value	negative_log10_of_adjusted_p_value	term_size	query_size	intersection_size	effective_domain_size	intersections
[truncated: 7 more rows]

[truncated: 1 more sheets: PCA4 positive g-Profiler]
